# Supplementary material for: Functional genomic screening reveals asparagine dependence as a metabolic vulnerability in sarcoma
Source: eLife journal article supplement (doi:10.7554/elife.09436), 2015-10-24
Supplement: supp [file elife-09436-supp-v1.zip]

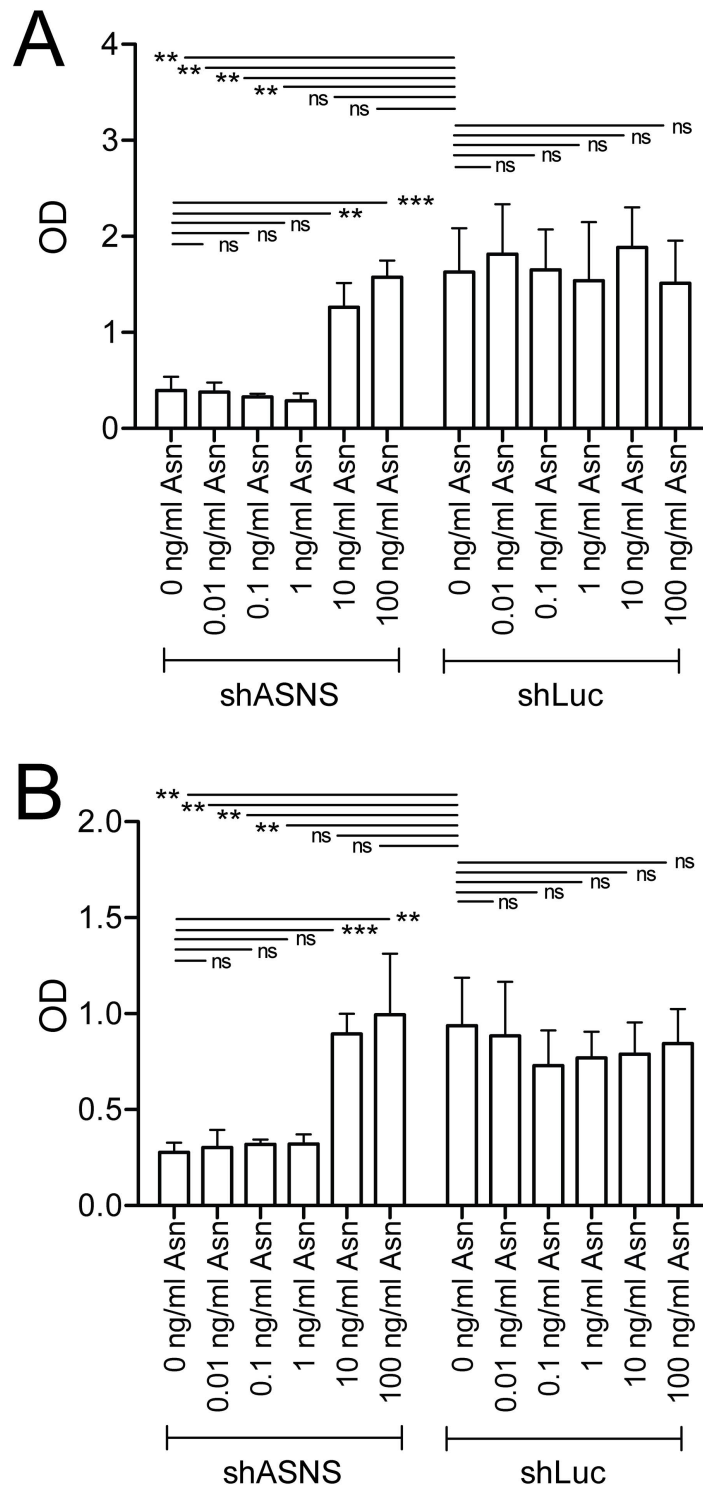

**Figure 2 - Figure Supplement 2. Asparagine concentrations  $\geq 10\text{mg/L}$  are needed to reverse the effects of ASNS silencing on sarcoma growth.**
