# Supplementary material for: Functional genomic screening reveals asparagine dependence as a metabolic vulnerability in sarcoma
Source: eLife journal article supplement (doi:10.7554/elife.09436), 2015-10-24
Supplement: supp [file elife-09436-supp-v1.zip]

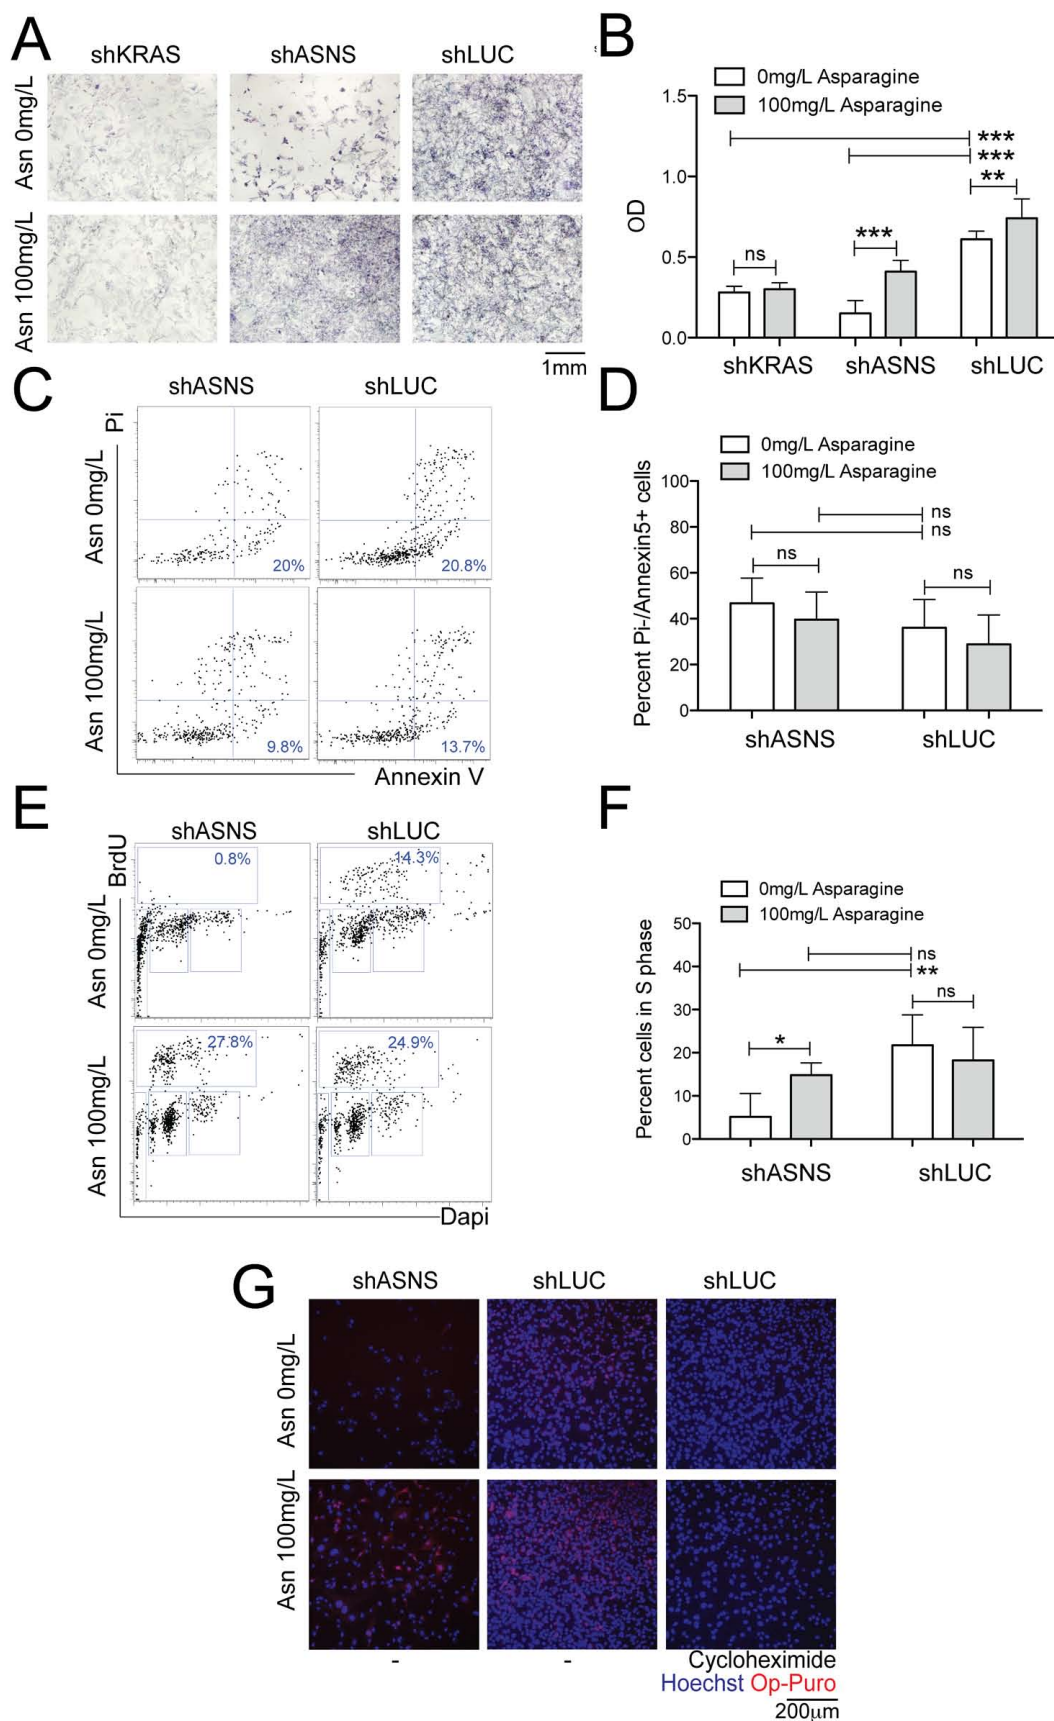

**Figure 2 – Figure supplement 1. Reduced mouse *Kras;p16p19<sup>null</sup>* NMS cell growth after *Asns* silencing was associated with reduced polypeptide synthesis.**
