# Supplementary material for: Functional genomic screening reveals asparagine dependence as a metabolic vulnerability in sarcoma
Source: eLife journal article supplement (doi:10.7554/elife.09436), 2015-10-24
Supplement: supp [file elife-09436-supp-v1.zip]

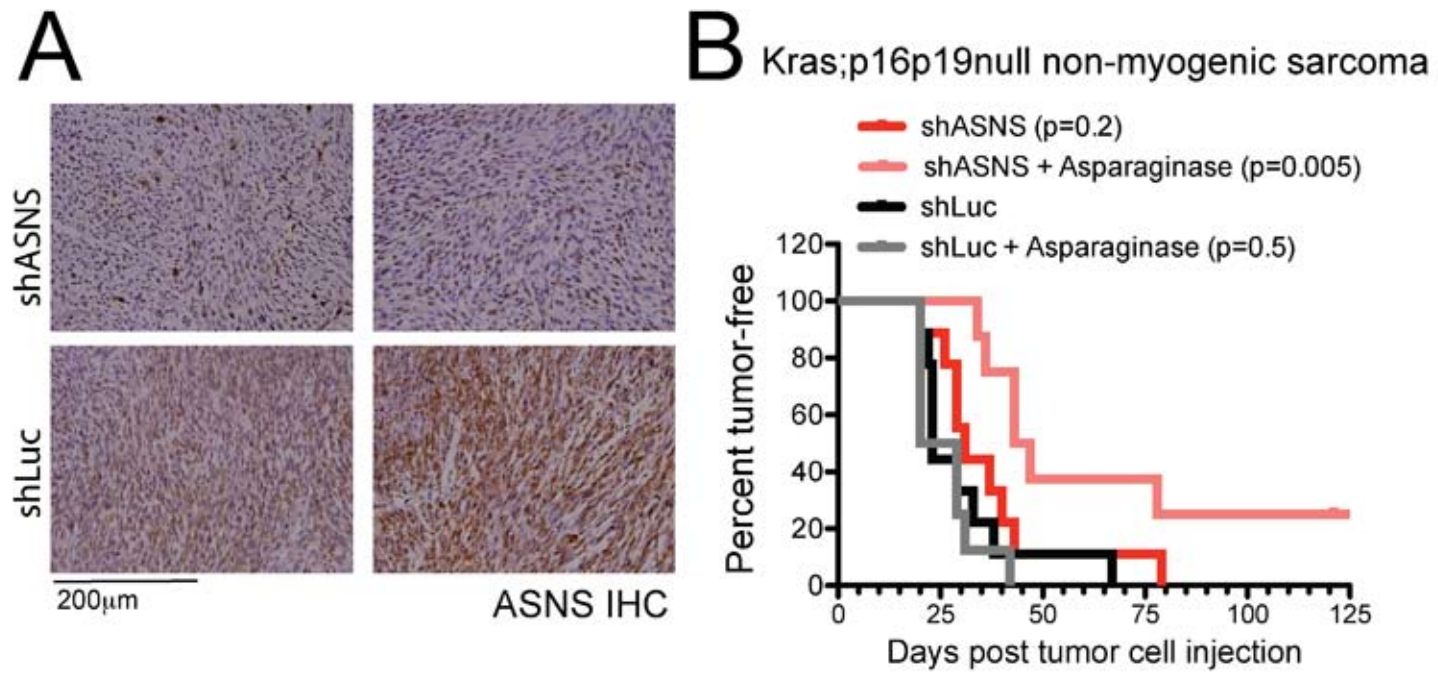

Figure 5 – Figure supplement 1. *Asns* silencing delayed *Kras*;p16p19<sup>null</sup> NMS growth in Asparagine-depleted mice.
