# Supplementary material for: Functional genomic screening reveals asparagine dependence as a metabolic vulnerability in sarcoma
Source: eLife. 2015 Oct 24;4:e09436. doi: 10.7554/eLife.09436 (PMC4695385; doi:10.7554/eLife.09436)
Supplement: Supplementary file 1. — DOI: http://dx.doi.org/10.7554/eLife.09436.014 [file elife-09436-supp1.xlsx]

## Sheet: Sheet1
	Supplementary file 1: Kras; p16p19null rhabdomyosarcoma cell line T14R: raw data from shRNA screen (plates DAS36-DAS45).
	Plate ID	Row	Col	Clone Name	Clone ID	Symbol	NCBI Gene ID	Taxon ID	Viral Particles/mL	(-) Puro	(-) Puro	(+) Puro	(+) Puro	(+) Puro	Average(-)	Average (+)	C.C.	Average	% of control (all)
	DAS43	F	4	NM_033360.2-407s1c1	TRCN0000033260	KRAS	3845	9606	8.736e+07	16459120	15910600	1676240	1252800	2636440	16184860	1855160	0.114623	7587040	0.382283
	DAS43	G	3	NM_033360.2-509s1c1	TRCN0000033262	KRAS	3845	9606	1.104e+08	14232600	18578880	2079280	514000	3628440	16405740	2.07391e+06	0.126413	7806640	0.393347
	DAS43	H	5	NM_033360.2-269s1c1	TRCN0000033263	KRAS	3845	9606	61440000	14268480	20160880	580880	253640	939040	17214680	591187	0.034342	7240584	0.364826
	DAS37	A	1	NM_009616.2-184s1c1	TRCN0000031896	Adam19	11492	10090	1.1424e+08	13285480	10780800	2493160	5272960	2861960	12033140	3.54269e+06	0.294411	6938872	0.415589
	DAS37	A	8	NM_009616.2-2297s1c1	TRCN0000031897	Adam19	11492	10090	1.3728e+08	20644080	19995600	18391760	22597240	21655720	20319840	2.08816e+07	1.02764	20656880	1.2372
	DAS37	C	10	NM_009616.2-660s1c1	TRCN0000031895	Adam19	11492	10090	1.3728e+08	24160000	24503040	19020040	28868880	27105160	24331520	2.4998e+07	1.02739	24731424	1.48123
	DAS37	E	3	NM_009616.2-3899s1c1	TRCN0000031894	Adam19	11492	10090	1.3728e+08	20447880	21419240	12231640	24852560	20959320	20933560	19347840	0.92425	19982128	1.19679
1	DAS37	F	4	NM_009616.2-946s1c1	TRCN0000031898	Adam19	11492	10090	1.1424e+08	16451040	23648120	1874200	18178480	13908880	20049580	11320520	0.564626	14812144	0.887141
	DAS41	A	10	NM_007403.2-1956s21c2	TRCN0000351178	Adam8	11501	10090	8.832e+07	5707640	6721240	1307800	4599560	2069320	6214440	2.65889e+06	0.427857	4081112	0.196801
	DAS41	B	11	NM_007403.2-87s21c2	TRCN0000351250	Adam8	11501	10090	1.3728e+08	17037400	18662640	15291160	14869680	14717200	17850020	1.49593e+07	0.838058	16115616	0.765948
	DAS41	F	10	NM_007403.2-542s21c3	TRCN0000334452	Adam8	11501	10090	1.3728e+08	20532840	18468960	17495440	17248280	15716240	19500900	1.682e+07	0.862524	17892352	0.832191
	DAS41	G	8	NM_007403.2-1151s21c1	TRCN0000331920	Adam8	11501	10090	1.3728e+08	23933320	23924320	24644680	21863280	22968400	23928820	2.31588e+07	0.96782	23466800	1.10416
	DAS41	G	10	NM_007403.1-2303s1c1	TRCN0000031785	Adam8	11501	10090	1.3728e+08	19812000	21458600	16250160	12331280	7864960	20635300	12148800	0.588739	15543400	0.739123
	DAS39	A	12	NM_026644.2-1549s21c1	TRCN0000250470	Agpat4	68262	10090	1.3728e+08	18119000	19816280	20801040	20650040	15019000	18967640	18823360	0.992393	18881072	1.11311
	DAS39	B	9	NM_026644.2-833s21c1	TRCN0000250469	Agpat4	68262	10090	1.3728e+08	19328160	21064000	23191680	23041560	19710680	20196080	2.19813e+07	1.08839	21267216	1.25378
	DAS39	B	12	NM_026644.2-614s21c1	TRCN0000250471	Agpat4	68262	10090	26880000	18602800	19594280	15965280	17038680	12290560	19098540	1.50982e+07	0.790541	16698320	0.984425
	DAS39	C	8	NM_026644.2-925s21c1	TRCN0000250472	Agpat4	68262	10090	1.3728e+08	20995400	23115720	24906000	24436680	23198280	22055560	24180320	1.09634	23330416	1.37541
	DAS39	H	6	NM_026644.2-871s21c1	TRCN0000250468	Agpat4	68262	10090	15360000	19954040	21848840	9486480	9899760	5264520	20901440	8216920	0.393127	13290728	0.783535
	DAS45	A	4	NM_009655.1-2767s1c1	TRCN0000094212	Alcam	11658	10090	9.792e+07	16728000	18450880	16628960	19317360	12112800	17589440	1.60197e+07	0.910757	16647600	0.847133
	DAS45	A	5	NM_009655.1-3419s1c1	TRCN0000094209	Alcam	11658	10090	9.984e+07	27225840	27895200	29383360	33080960	28615360	27560520	3.03599e+07	1.10157	29240144	1.48792
	DAS45	B	9	NM_009655.2-1859s21c1	TRCN0000327357	Alcam	11658	10090	9.408e+07	13826320	11616520	9875120	10214480	9024960	12721420	9.70485e+06	0.762875	10911480	0.555244
	DAS45	F	3	NM_009655.2-2055s21c1	TRCN0000377057	Alcam	11658	10090	1.3728e+08	18046720	10708680	5753960	15537480	3643600	14377700	8311680	0.578095	10738088	0.54642
	DAS45	G	7	NM_009655.1-2312s1c1	TRCN0000094210	Alcam	11658	10090	9.504e+07	31848800	34279920	26094120	38467120	23752120	33064360	2.94378e+07	0.890318	30888416	1.57179
	DAS38	A	1	NM_177305.4-667s21c1	TRCN0000348152	Arl4c	320982	10090	1.3728e+08	20838600	22542280	21584640	19118400	14562080	21690440	1.84217e+07	0.849301	19729200	0.998553
	DAS38	A	6	NM_177305.4-1234s21c1	TRCN0000348086	Arl4c	320982	10090	1.3728e+08	13015000	17721200	12435000	11428000	2638480	15368100	8.83383e+06	0.574816	11447536	0.579394
	DAS38	C	11	NM_177305.4-1208s21c1	TRCN0000380301	Arl4c	320982	10090	1.3728e+08	23357200	23989840	23542960	22862120	16942080	23673520	21115720	0.891955	22138840	1.12051
	DAS38	D	12	NM_177305.4-1049s21c1	TRCN0000334004	Arl4c	320982	10090	1.3728e+08	20238760	19997400	21608960	16761400	14706520	20118080	1.76923e+07	0.879423	18662608	0.94457
	DAS38	E	2	NM_177305.4-1067s21c1	TRCN0000374665	Arl4c	320982	10090	1.3728e+08	21624360	22018800	25185760	19744080	13526320	21821580	1.94854e+07	0.892941	20419864	1.03351
	DAS44	B	2	NM_026139.2-2976s1c1	TRCN0000125852	Armcx2	67416	10090	61440000	27907840	27519560	26527440	25639880	15485800	27713700	22551040	0.813715	24616104	1.20443
	DAS44	C	9	NM_026139.3-1117s21c1	TRCN0000312295	Armcx2	67416	10090	3.36e+07	28571000	28723640	23971080	23318400	14455320	28647320	20581600	0.718448	23807888	1.16489
	DAS44	F	2	NM_026139.2-3321s1c1	TRCN0000125849	Armcx2	67416	10090	1.3728e+08	22169040	23050000	9987520	4910480	7733760	22609520	7543920	0.333661	13570160	0.663968
	DAS44	G	6	NM_026139.3-869s21c1	TRCN0000312294	Armcx2	67416	10090	2.016e+07	30602880	28021760	20250720	20178440	16997040	29312320	1.91421e+07	0.653038	23210168	1.13564
	DAS44	H	1	NM_026139.2-2919s1c1	TRCN0000125850	Armcx2	67416	10090	9.6e+07	24845480	23706800	23056240	22652360	20153200	24276140	2.19539e+07	0.904342	22882816	1.11962
	DAS41	A	5	NM_012055.1-299s1c1	TRCN0000031701	Asns	27053	10090	1.3728e+08	19383000	20136840	13542640	11542160	12603720	19759920	12562840	0.635774	15441672	0.730136
	DAS41	A	8	NM_012055.1-821s1c1	TRCN0000031703	Asns	27053	10090	1.3728e+08	7587560	9526560	1200400	932080	2374000	8557060	1502160	0.175546	4324120	0.21259
	DAS41	B	9	NM_012055.1-1397s1c1	TRCN0000031700	Asns	27053	10090	1.3728e+08	9172840	6281400	2268800	2555640	1657720	7727120	2160720	0.279628	4387280	0.192833
	DAS41	D	6	NM_012055.3-787s21c1	TRCN0000324779	Asns	27053	10090	1.3728e+08	5497960	6181720	916520	1093280	725760	5839840	911853	0.156144	2883048	0.138876
	DAS41	F	9	NM_012055.1-1603s1c1	TRCN0000031702	Asns	27053	10090	1.2864e+08	8482600	11794600	1305640	855160	736360	10138600	965720	0.0952518	4634872	0.233672
	DAS36	D	1	NM_027395.1-33s21c1	TRCN0000250263	Basp1	70350	10090	9.216e+07	5565720	7655640	11280720	5162440	13204560	6610680	9.88257e+06	1.49494	8573816	0.49828
	DAS36	D	3	NM_027395.1-51s1c1	TRCN0000202255	Basp1	70350	10090	4.704e+07	8855800	2536640	2341040	2250360	4439800	5696220	3010400	0.528491	4084728	0.23739
	DAS36	F	2	NM_027395.1-55s21c1	TRCN0000250262	Basp1	70350	10090	1.3728e+08	7854960	7682200	10078960	1578040	4988280	7768580	5.54843e+06	0.714214	6436488	0.374066
	DAS36	F	3	NM_027395.1-495s21c1	TRCN0000250266	Basp1	70350	10090	1.3056e+08	10277840	15563800	12214080	5342400	11258400	12920820	9604960	0.743371	10931304	0.635289
	DAS36	F	11	NM_027395.1-47s21c1	TRCN0000250265	Basp1	70350	10090	1.3728e+08	11892640	8457840	12379040	3982600	8337680	10175240	8.23311e+06	0.809131	9009960	0.523628
	DAS40	B	2	NM_013815.2-1102s21c1	TRCN0000241700	Baz1a	217578	10090	1.008e+08	11497640	12919720	11551960	4450040	9412720	12208680	8.47157e+06	0.693898	9966416	0.563492
	DAS40	D	8	NM_013815.2-534s21c1	TRCN0000244323	Baz1a	217578	10090	6.624e+07	14598240	15116360	2698640	8205880	4505360	14857300	5.13663e+06	0.345731	9024896	0.510259
	DAS40	D	12	NM_013815.2-752s21c1	TRCN0000241701	Baz1a	217578	10090	1.3056e+08	2577280	7958960	1780760	2964440	2951880	5268120	2.56569e+06	0.487023	3646664	0.206179
	DAS40	E	7	NM_013815.2-2752s21c1	TRCN0000244322	Baz1a	217578	10090	1.008e+08	11028880	13577040	10057400	10587200	10636760	12302960	10427120	0.847529	11177456	0.631963
	DAS40	F	10	NM_013815.2-5818s21c1	TRCN0000241702	Baz1a	217578	10090	1.3728e+08	17197920	16055640	12401600	14721240	16607760	16626780	1.45769e+07	0.87671	15396832	0.870523
	DAS39	A	10	NM_007532.2-533s1c1	TRCN0000103176	Bcat1	12035	10090	1.008e+08	14063280	18710160	8376480	12154000	9051360	16386720	9.86061e+06	0.601744	12471056	0.735213
	DAS39	B	4	NM_007532.2-2145s1c1	TRCN0000103175	Bcat1	12035	10090	1.3728e+08	20127080	20534520	19664000	22939800	15731800	20330800	19445200	0.95644	19799440	1.16725
	DAS39	C	6	NM_007532.2-727s1c1	TRCN0000103178	Bcat1	12035	10090	1.0368e+08	8745200	17383800	6263520	6729040	2856680	13064500	5283080	0.404384	8395648	0.494953
	DAS39	F	5	NM_007532.5-463s21c1	TRCN0000317184	Bcat1	12035	10090	7.872e+07	13523680	16962520	7082600	8992280	7021760	15243100	7698880	0.505073	10716568	0.631779
	DAS39	G	7	NM_007532.2-1245s1c1	TRCN0000103177	Bcat1	12035	10090	1.3728e+08	21160960	22680520	21014680	21395240	18688920	21920740	20366280	0.929087	20988064	1.23732
	DAS36	A	12	NM_007569.2-590s21c1	TRCN0000310861	Btg1	12226	10090	1.3728e+08	3500920	13680000	8039400	7880000	6825640	8590460	7581680	0.88257	7985192	0.464072
	DAS36	C	5	NM_007569.1-499s1c1	TRCN0000055298	Btg1	12226	10090	9.312e+07	4345720	2315120	1289480	519640	1356720	3330420	1055280	0.316861	1965336	0.114219
	DAS36	F	8	NM_007569.2-738s21c1	TRCN0000304264	Btg1	12226	10090	1.3728e+08	12205720	20196440	21985280	18777360	20400960	16201080	2.03879e+07	1.25843	18713152	1.08754
	DAS36	G	11	NM_007569.2-1138s21c1	TRCN0000304263	Btg1	12226	10090	1.3728e+08	15232880	17960880	16333600	12081440	15542480	16596880	1.46525e+07	0.882847	15430256	0.896753
	DAS36	H	7	NM_007569.1-351s1c1	TRCN0000055300	Btg1	12226	10090	1.3344e+08	17232840	21789000	11493120	14078720	9182840	19510920	1.15849e+07	0.593765	14755304	0.857527
	DAS39	B	1	NM_027994.1-4819s21c1	TRCN0000239082	Cand1	71902	10090	1.1328e+08	13855320	17291240	14848200	14185560	11279840	15573280	1.34379e+07	0.86288	14292032	0.842566
	DAS39	B	2	NM_027994.1-2057s21c1	TRCN0000218736	Cand1	71902	10090	1.3728e+08	20704680	21725640	23722320	24506120	23338720	21215160	23855720	1.12447	22799496	1.34411
	DAS39	C	9	NM_027994.1-3248s21c1	TRCN0000239084	Cand1	71902	10090	1.3728e+08	15907240	20066680	19028840	20649960	16930640	17986960	1.88698e+07	1.04908	18516672	1.09162
	DAS39	D	3	NM_027994.1-953s21c1	TRCN0000239085	Cand1	71902	10090	1.3728e+08	12466160	14513880	6879200	4468280	6473280	13490020	5.94025e+06	0.440344	8960160	0.528233
	DAS39	G	1	NM_027994.1-2099s21c1	TRCN0000239083	Cand1	71902	10090	1.3728e+08	14234600	17653320	14819040	7424240	8903680	15943960	10382320	0.651176	12606976	0.743226
	DAS43	E	8	NM_007599.3-1055s21c1	TRCN0000318310	Capg	12332	10090	9.312e+07	19682520	20018160	8291360	1843880	9502240	19850340	6.54583e+06	0.329759	11867632	0.597966
	DAS43	F	8	NM_007599.1-883s1c1	TRCN0000091421	Capg	12332	10090	1.152e+08	22897000	26383720	15798560	2618200	16554440	24640360	1.16571e+07	0.473088	16850384	0.849028
	DAS43	G	5	NM_007599.3-180s21c1	TRCN0000318307	Capg	12332	10090	1.1808e+08	23584120	27266800	13084000	4939840	14077160	25425460	1.07003e+07	0.420851	16590384	0.835927
	DAS43	G	10	NM_007599.1-1008s1c1	TRCN0000091422	Capg	12332	10090	9.312e+07	24265320	25156280	15164440	7443240	17604040	24710800	1.34039e+07	0.542431	17926664	0.903258
	DAS43	G	12	NM_007599.1-1242s1c1	TRCN0000091419	Capg	12332	10090	8.64e+07	17505640	15785160	2318760	601280	6461960	16645400	3.12733e+06	0.18788	8534560	0.430025
	DAS37	A	10	NM_025779.2-566s1c1	TRCN0000174454	Ccdc109b	66815	10090	1.3728e+08	23455600	24573840	21514360	26354440	25185160	24014720	24351320	1.01402	24216680	1.45041
	DAS37	C	9	NM_025779.3-426s21c1	TRCN0000340568	Ccdc109b	66815	10090	1.3728e+08	3816720	9817560	1175280	2102840	3722600	6817140	2.33357e+06	0.34231	4127000	0.247178
	DAS37	G	12	NM_025779.2-1205s1c1	TRCN0000193898	Ccdc109b	66815	10090	1.3728e+08	15460000	16418200	2883840	9678480	9074520	15939100	7212280	0.45249	10703008	0.641033
	DAS37	H	1	NM_025779.3-572s21c1	TRCN0000340490	Ccdc109b	66815	10090	1.3728e+08	19452680	20511520	16659360	22265040	17220280	19982100	1.87149e+07	0.936583	19221776	1.15125
	DAS37	H	2	NM_025779.3-653s21c1	TRCN0000340489	Ccdc109b	66815	10090	107520000	17656880	18347280	7404640	16298520	12586440	18002080	1.20965e+07	0.671952	14458752	0.865975
	DAS38	A	8	NM_009828.1-614s1c1	TRCN0000077766	Ccna2	12428	10090	1.3728e+08	11650400	16205720	12705200	5053160	4167760	13928060	7.30871e+06	0.524747	9956448	0.503925
	DAS38	B	12	NM_009828.1-1617s1c1	TRCN0000077763	Ccna2	12428	10090	1.3728e+08	25996560	24702920	22220640	19344680	16680600	25349740	1.94153e+07	0.765898	21789080	1.10281
	DAS38	C	9	NM_009828.1-626s1c1	TRCN0000077764	Ccna2	12428	10090	1.3728e+08	21105240	24952680	21551840	20139880	9444440	23028960	1.70454e+07	0.740172	19438816	0.983856
	DAS38	C	10	NM_009828.1-1314s1c1	TRCN0000077765	Ccna2	12428	10090	1.3728e+08	29013240	29558840	28310920	22950040	23910520	29286040	25057160	0.855601	26748712	1.35383
	DAS38	D	2	NM_009828.1-890s1c1	TRCN0000077767	Ccna2	12428	10090	1.3728e+08	16939600	21144640	20117360	9971800	4949680	19042120	1.16796e+07	0.613357	14624616	0.740195
	DAS36	A	10	NM_007631.2-606s21c1	TRCN0000312873	Ccnd1	12443	10090	1.3728e+08	16618800	17525800	17416560	16624880	11199520	17072300	15080320	0.883321	15877112	0.922723
	DAS36	B	10	NM_007631.2-1443s21c1	TRCN0000312881	Ccnd1	12443	10090	1.1136e+08	10550880	12615840	16089680	12327400	12850000	11583360	1.37557e+07	1.18754	12886760	0.748934
	DAS36	E	10	NM_007631.1-879s1c1	TRCN0000026910	Ccnd1	12443	10090	1.3728e+08	12144320	15131720	15235200	14238680	17340480	13638020	1.56048e+07	1.14421	14818080	0.861175
	DAS36	F	6	NM_007631.2-801s21c1	TRCN0000312946	Ccnd1	12443	10090	8.256e+07	6847640	7766360	10524120	4332680	5989920	7307000	6.94891e+06	0.950993	7092144	0.412171
	DAS36	G	6	NM_007631.2-925s21c1	TRCN0000311853	Ccnd1	12443	10090	1.3728e+08	17002760	16193920	18764480	9408680	16995680	16598340	15056280	0.907096	15673104	0.910866
	DAS45	A	9	NM_023223.1-296s1c1	TRCN0000027679	Cdc20	107995	10090	1.0464e+08	3831120	6883560	1403480	2669480	1944640	5357340	2.00587e+06	0.374415	3346456	0.170288
	DAS45	E	5	NM_023223.2-1041s21c1	TRCN0000280171	Cdc20	107995	10090	1.3728e+08	6748400	3740560	1983480	3415800	2324360	5244480	2.57455e+06	0.490906	3642520	0.185354
	DAS45	E	9	NM_023223.2-766s21c1	TRCN0000297357	Cdc20	107995	10090	0	13827200	15060400	5934480	14935480	6556280	14443800	9142080	0.632941	11262768	0.573119
	DAS45	F	5	NM_023223.1-1352s1c1	TRCN0000027730	Cdc20	107995	10090	1.3728e+08	22626080	13914440	7903760	18372000	7735560	18270260	1.13371e+07	0.620522	14110368	0.718023
	DAS45	F	9	NM_023223.1-894s1c1	TRCN0000027706	Cdc20	107995	10090	1.3248e+08	23667360	10549360	5343000	22305040	7334600	17108360	11660880	0.68159	13839872	0.704258
	DAS45	B	3	NM_028023.3-794s21c1	TRCN0000279292	Cdca4	71963	10090	1.1424e+08	18177160	18403080	23877920	19047600	17598320	18290120	2.01746e+07	1.10303	19420816	0.988251
	DAS45	E	7	NM_028023.3-830s21c1	TRCN0000375945	Cdca4	71963	10090	3.648e+07	27542280	27556240	20893240	33816720	23962960	27549260	2.62243e+07	0.951906	26754288	1.36142
	DAS45	F	8	NM_028023.3-1027s1c1	TRCN0000180955	Cdca4	71963	10090	1.3728e+08	14888480	8214640	1579840	3197760	1225760	11551560	2001120	0.173234	5821296	0.296224
	DAS45	G	8	NM_028023.3-1082s1c1	TRCN0000196081	Cdca4	71963	10090	1.3728e+08	18350080	12277840	3218720	7512440	2762280	15313960	4.49781e+06	0.293707	8824272	0.449034
	DAS45	H	8	NM_028023.3-1879s1c1	TRCN0000184592	Cdca4	71963	10090	9.792e+07	25718080	21052760	10286160	29496000	15906560	23385420	1.85629e+07	0.793781	20491912	1.04276
	DAS43	A	2	NM_009866.3-3338s1c1	TRCN0000094829	Cdh11	12552	10090	7.008e+07	22594560	24262600	16814400	10434480	19463880	23428580	15570920	0.664612	18713984	0.942928
	DAS43	B	4	NM_009866.4-3295s21c1	TRCN0000329523	Cdh11	12552	10090	1.3728e+08	23585920	25696160	22586360	17162040	22827880	24641040	20858760	0.846505	22371672	1.12722
	DAS43	E	9	NM_009866.4-2149s21c1	TRCN0000329524	Cdh11	12552	10090	61440000	16750000	20835000	2402800	2615640	3185200	18792500	2.73455e+06	0.145513	9157728	0.461424
	DAS43	G	1	NM_009866.4-2260s21c1	TRCN0000329455	Cdh11	12552	10090	1.3728e+08	18889600	21761720	15800600	7104600	19037240	20325660	1.39808e+07	0.687841	16518752	0.832318
	DAS43	G	11	NM_009866.4-2593s21c1	TRCN0000329454	Cdh11	12552	10090	1.056e+08	20628240	16507520	2132520	1568240	4861400	18567880	2.85405e+06	0.153709	9139584	0.460509
	DAS37	A	9	NM_007664.1-1047s1c1	TRCN0000094857	Cdh2	12558	10090	1.3728e+08	13539000	16408760	7690280	16242120	9144160	14973880	11025520	0.736317	12604864	0.754941
	DAS37	D	11	NM_007664.4-3410s21c1	TRCN0000375419	Cdh2	12558	10090	1.3728e+08	19588680	22244640	7641080	25115040	16527920	20916660	1.6428e+07	0.785403	18223472	1.09146
	DAS37	F	11	NM_007664.4-1805s21c1	TRCN0000327315	Cdh2	12558	10090	1.3728e+08	21179280	23055760	17363640	26168080	21760600	22117520	2.17641e+07	0.984021	21905472	1.31198
	DAS37	H	3	NM_007664.1-2975s1c1	TRCN0000094858	Cdh2	12558	10090	1.3728e+08	21789880	20455480	9614280	20992560	14006120	21122680	1.4871e+07	0.704029	17371664	1.04044
	DAS37	H	4	NM_007664.4-949s21c1	TRCN0000363547	Cdh2	12558	10090	1.3728e+08	22686680	23038200	18555920	25597640	20312560	22862440	2.14887e+07	0.939913	22038200	1.31993
	DAS45	B	7	NM_009871.2-1990s1c1	TRCN0000009515	Cdk5r1	12569	10090	1.1616e+08	12376000	10903720	8820280	12466760	8419960	11639860	9.90233e+06	0.850726	10597344	0.539258
	DAS45	B	11	NM_009871.2-1295s1c1	TRCN0000009518	Cdk5r1	12569	10090	5.28e+07	13861800	8604360	4052040	8214440	4214200	11233080	5493560	0.489052	7789368	0.396371
	DAS45	C	1	NM_009871.2-1240s1c1	TRCN0000009517	Cdk5r1	12569	10090	1.104e+08	24702520	25103520	21445880	28668440	17867480	24903020	22660600	0.909954	23557568	1.19875
	DAS45	E	4	NM_009871.2-1044s21c1	TRCN0000434115	Cdk5r1	12569	10090	1.3728e+08	10467440	14382240	9626240	14280320	9364840	12424840	1.10905e+07	0.892604	11624216	0.591512
	DAS45	G	4	NM_009871.2-1668s21c1	TRCN0000418778	Cdk5r1	12569	10090	1.3728e+08	23479200	15447800	14985880	20950160	11648840	19463500	1.58616e+07	0.814942	17302376	0.880452
	DAS38	B	9	NM_009873.1-895s1c1	TRCN0000023149	Cdk6	12571	10090	1.3728e+08	12258320	19787680	16553760	8633720	10449000	16023000	1.18788e+07	0.741361	13536496	0.685122
	DAS38	E	7	NM_009873.1-830s1c1	TRCN0000023153	Cdk6	12571	10090	1.3728e+08	11591120	21522920	17322160	14287640	9983840	16557020	1.38645e+07	0.837382	14941536	0.756235
	DAS38	F	4	NM_009873.1-367s1c1	TRCN0000023152	Cdk6	12571	10090	15360000	29795880	29575160	4401880	7503880	5397480	29685520	5.76775e+06	0.194295	15334856	0.776142
	DAS38	F	8	NM_009873.1-670s1c1	TRCN0000023150	Cdk6	12571	10090	1.3728e+08	20878520	22702280	18561040	9883800	5482400	21790400	11309080	0.518994	15501608	0.784582
	DAS38	G	2	NM_009873.1-873s1c1	TRCN0000023151	Cdk6	12571	10090	1.3728e+08	19149760	20891400	20751400	12453280	13057320	20020580	1.54207e+07	0.770241	17260632	0.873612
	DAS45	C	8	NM_026014.3-1750s21c1	TRCN0000276816	Cdt1	67177	10090	1.3728e+08	17420280	20429280	18685040	24318920	11336160	18924780	1.81134e+07	0.957125	18437936	0.938236
	DAS45	C	10	NM_026014.3-860s21c1	TRCN0000276769	Cdt1	67177	10090	1.3728e+08	7032840	12691320	2104680	10546640	4370520	9862080	5.67395e+06	0.57533	7349200	0.373973
	DAS45	D	4	NM_026014.3-1337s21c1	TRCN0000276817	Cdt1	67177	10090	3.552e+07	14320560	5682160	11428440	17808880	3952440	10001360	1.10633e+07	1.10617	10638496	0.541353
	DAS45	D	8	NM_026014.3-364s1c1	TRCN0000174013	Cdt1	67177	10090	1.3728e+08	2224440	13044680	679880	3585800	3012120	7634560	2.42593e+06	0.317757	4509384	0.229465
	DAS45	D	11	NM_026014.3-714s1c1	TRCN0000173872	Cdt1	67177	10090	0	15950000	18234920	10786760	20582920	9430400	17092460	1.36e+07	0.795674	14997000	0.76314
	DAS43	A	11	NM_007681.1-233s1c1	TRCN0000093126	Cenpa	12615	10090	7.008e+07	21806760	22703360	15928640	17314200	18812280	22255060	1.73517e+07	0.779675	19313048	0.973112
	DAS43	D	7	NM_007681.1-226s1c1	TRCN0000093127	Cenpa	12615	10090	6.048e+07	13459920	16626120	1439000	638600	1683080	15043020	1253560	0.0833317	6769344	0.341082
	DAS43	E	5	NM_007681.1-934s1c1	TRCN0000093123	Cenpa	12615	10090	1.152e+08	25140080	27749240	10481680	3099320	19550520	26444660	11043840	0.417621	17204168	0.866854
	DAS43	G	2	NM_007681.1-484s1c1	TRCN0000093125	Cenpa	12615	10090	1.3728e+08	19056080	21024280	5801400	1868280	8315040	20040180	5328240	0.265878	11213016	0.564982
	DAS43	H	8	NM_007681.1-312s1c1	TRCN0000093124	Cenpa	12615	10090	2.784e+07	24938760	22714200	3892400	840000	4616200	23826480	3116200	0.130787	11400312	0.574419
	DAS44	A	8	NM_173762.3-3120s1c1	TRCN0000089926	Cenpe	229841	10090	9.312e+07	28014920	28058240	20304880	21225680	14210560	28036580	1.85804e+07	0.662719	22362856	1.09418
	DAS44	B	7	NM_173762.4-1505s21c1	TRCN0000287430	Cenpe	229841	10090	1.008e+08	20449320	22394040	16953080	16159360	10550160	21421680	14554200	0.679414	17301192	0.846522
	DAS44	B	9	NM_173762.4-3060s21c1	TRCN0000294792	Cenpe	229841	10090	1.3728e+08	13927040	14653200	8231040	5991520	2107360	14290120	5.44331e+06	0.380914	8982032	0.439478
	DAS44	C	6	NM_173762.4-7623s21c1	TRCN0000294860	Cenpe	229841	10090	1.3728e+08	14501320	17677480	12106120	11637040	9577160	16089400	1.11068e+07	0.690316	13099824	0.640955
	DAS44	E	6	NM_173762.3-4827s1c1	TRCN0000089925	Cenpe	229841	10090	9.792e+07	15348120	17243840	12644200	9774960	6630000	16295980	9.68305e+06	0.594199	12328224	0.603202
	DAS40	A	9	NM_028760.2-1774s21c1	TRCN0000375942	Cep55	74107	10090	1.1808e+08	13045640	21489120	10815240	11950560	17330880	17267380	13365560	0.774035	14926288	0.843919
	DAS40	B	5	NM_028760.1-1146s1c1	TRCN0000183083	Cep55	74107	10090	9.792e+07	14044480	16819520	10809040	14797760	11872640	15432000	1.24931e+07	0.809561	13668688	0.772815
	DAS40	C	6	NM_028760.2-2066s21c1	TRCN0000375943	Cep55	74107	10090	1.1904e+08	13871240	14334760	9502440	10258040	14775920	14103000	1.15121e+07	0.81629	12548480	0.70948
	DAS40	D	5	NM_028760.2-1179s21c1	TRCN0000366894	Cep55	74107	10090	1.3728e+08	14634320	10960720	10886080	16417720	14716680	12797520	1.40068e+07	1.0945	13523104	0.764584
	DAS40	H	5	NM_028760.2-989s21c1	TRCN0000366948	Cep55	74107	10090	9.408e+07	12170960	17258360	12860520	13247800	9785800	14714660	1.19647e+07	0.813115	13064688	0.738666
	DAS41	A	4	NM_001081163.1-2636s21c1	TRCN0000252617	Chsy1	269941	10090	1.3728e+08	23124280	24738920	21843360	19568920	14317760	23931600	18576680	0.776241	20718648	0.982488
	DAS41	B	8	NM_001081163.1-3588s21c1	TRCN0000252618	Chsy1	269941	10090	1.3728e+08	26345680	25639320	25098200	24495240	24328160	25992500	2.46405e+07	0.947986	25181320	1.18155
	DAS41	C	2	NM_001081163.1-1110s21c1	TRCN0000252619	Chsy1	269941	10090	1.3728e+08	22070720	21437160	15644480	20956720	12752440	21753940	1.64512e+07	0.756241	18572304	0.870916
	DAS41	F	8	NM_001081163.1-1241s21c1	TRCN0000252616	Chsy1	269941	10090	1.3728e+08	15818280	10761280	6167120	4315480	3940720	13289780	4.80777e+06	0.361765	8200576	0.362073
	DAS42	B	9	NM_029295.2-150s21c1	TRCN0000327443	Cklf	75458	10090	9.696e+07	26522480	22988640	23191720	26520520	17146480	24755560	22286240	0.900252	23273968	1.0486
	DAS42	D	1	NM_029295.1-308s1c1	TRCN0000089298	Cklf	75458	10090	30720000	25230360	18156800	18262320	26914280	16992520	21693580	20723040	0.955261	21111256	0.968119
	DAS42	D	6	NM_029295.2-395s21c1	TRCN0000327367	Cklf	75458	10090	1.3728e+08	5290960	4794560	3258320	4905480	1949720	5042760	3.37117e+06	0.668518	4039808	0.174987
	DAS42	F	1	NM_029295.2-460s21c1	TRCN0000327444	Cklf	75458	10090	122880000	23233440	16497560	8387600	18905880	6439760	19865500	1.12444e+07	0.566027	14692848	0.658289
	DAS42	H	4	NM_029295.2-305s21c1	TRCN0000327366	Cklf	75458	10090	1.3728e+08	21636480	22698000	13494480	20896800	11265880	22167240	1.52191e+07	0.686556	17998328	0.836664
	DAS42	B	6	NM_016904.1-192s1c1	TRCN0000025042	Cks1b	54124	10090	1.2192e+08	17715200	17163440	18059520	25792040	13870160	17439320	1.92406e+07	1.10329	18520072	0.783519
	DAS42	D	4	NM_016904.1-160s21c1	TRCN0000274746	Cks1b	54124	10090	1.3728e+08	19543880	16162040	6762400	20481880	11334480	17852960	1.28596e+07	0.720306	14856936	0.730415
	DAS42	F	3	NM_016904.1-268s21c1	TRCN0000274691	Cks1b	54124	10090	1.3728e+08	25902480	27338200	21518200	29082720	24447280	26620340	2.50161e+07	0.939735	25657776	1.27797
	DAS42	F	5	NM_016904.1-541s21c1	TRCN0000274752	Cks1b	54124	10090	1.3728e+08	24496600	17249680	10440080	20948320	10377320	20873140	1.39219e+07	0.666977	16702400	0.782042
	DAS42	G	9	NM_016904.1-126s21c1	TRCN0000274693	Cks1b	54124	10090	1.296e+08	25840640	24158200	15575040	21042400	12592240	24999420	1.64032e+07	0.656144	19841704	0.940731
	DAS36	C	12	NM_025415.3-359s21c1	TRCN0000368800	Cks2	66197	10090	1.3728e+08	12264840	7475000	3350400	2941000	3830120	9869920	3373840	0.341831	5972272	0.347088
	DAS36	E	5	NM_025415.1-171s1c1	TRCN0000025046	Cks2	66197	10090	9.408e+07	20628320	25425560	23193360	26939080	27467680	23026940	2.58667e+07	1.12332	24730800	1.43727
	DAS36	F	7	NM_025415.3-251s21c1	TRCN0000361763	Cks2	66197	10090	1.0272e+08	9665920	7978320	11487120	3630640	10531800	8822120	8.54985e+06	0.969138	8658760	0.503217
	DAS36	G	7	NM_025415.1-162s1c1	TRCN0000025044	Cks2	66197	10090	7.296e+07	19824000	20551120	20626920	13313960	16782720	20187560	1.69079e+07	0.837539	18219744	1.05887
	DAS36	H	2	NM_025415.1-276s1c1	TRCN0000025045	Cks2	66197	10090	9.6e+07	20018640	22611280	24717880	23386960	22775480	21314960	2.36268e+07	1.10846	22702048	1.31936
	DAS44	A	9	NM_016691.2-240s1c1	TRCN0000069494	Clcn5	12728	10090	7.2e+07	21375120	12425960	12606880	13875360	7258480	16900540	1.12469e+07	0.665476	13508360	0.660945
	DAS44	B	6	NM_016691.2-437s1c1	TRCN0000069497	Clcn5	12728	10090	1.1328e+08	7657080	16498440	8964560	9816240	5703520	12077760	8161440	0.675741	9727968	0.475975
	DAS44	C	8	NM_016691.2-1163s21c1	TRCN0000352262	Clcn5	12728	10090	1.3728e+08	11418600	18405160	11635640	9437160	12527440	14911880	11200080	0.751084	12684800	0.620649
	DAS44	D	5	NM_016691.2-1748s1c1	TRCN0000069496	Clcn5	12728	10090	1.104e+08	29128240	26890440	19317440	22980920	15703320	28009340	1.93339e+07	0.690266	22804072	1.11577
	DAS44	F	12	NM_016691.2-658s21c1	TRCN0000352261	Clcn5	12728	10090	1.3728e+08	15486360	17917520	12977200	13594040	12999320	16701940	1.31902e+07	0.78974	14594888	0.714107
	DAS36	A	1	NM_009929.3-1837s21c1	TRCN0000326587	Col18a1	12822	10090	1.3728e+08	14613360	18927040	17789840	16688280	15190640	16770200	1.65563e+07	0.987242	16641832	0.967166
	DAS36	B	12	NM_009929.3-4116s21c1	TRCN0000326586	Col18a1	12822	10090	1.3728e+08	5229200	17496280	16929160	12265880	13834400	11362740	1.43431e+07	1.2623	13150984	0.76429
	DAS36	C	8	NM_009929.2-1413s1c1	TRCN0000109538	Col18a1	12822	10090	3.744e+07	11071200	11901400	6559280	7385040	8675280	11486300	7.53987e+06	0.656423	9118440	0.529932
	DAS36	D	5	NM_009929.3-3987s21c1	TRCN0000326517	Col18a1	12822	10090	1.1712e+08	6792760	4703160	2126960	4322080	6527200	5747960	4.32541e+06	0.752513	4894432	0.284447
	DAS36	G	12	NM_009929.3-917s21c1	TRCN0000326519	Col18a1	12822	10090	1.3728e+08	9393720	13023200	12830040	7984640	9142800	11208460	9.98583e+06	0.890919	10474880	0.608764
	DAS40	D	4	NM_028071.3-482s21c1	TRCN0000277052	Cotl1	72042	10090	1.2576e+08	988080	1510280	588400	522600	579200	1249180	563400	0.451016	837712	0.0473635
	DAS40	G	8	NM_028071.3-397s21c1	TRCN0000350228	Cotl1	72042	10090	1.3728e+08	11911880	10870960	7020240	4919080	5225560	11391420	5.72163e+06	0.502275	7989544	0.451722
	DAS40	H	4	NM_028071.1-266s1c1	TRCN0000184279	Cotl1	72042	10090	9.984e+07	13647600	14930080	2430800	5228160	4776880	14288840	4145280	0.290106	8202704	0.463773
	DAS40	H	6	NM_028071.1-366s1c1	TRCN0000196183	Cotl1	72042	10090	7.392e+07	21820640	22717680	19166520	20321400	15502440	22269160	18330120	0.823117	19905736	1.12545
	DAS40	H	7	NM_028071.3-587s21c1	TRCN0000277104	Cotl1	72042	10090	1.3248e+08	17901920	20288520	17283760	19724680	16433360	19095220	1.78139e+07	0.9329	18326448	1.03616
	DAS45	A	1	NM_178661.2-851s1c1	TRCN0000084449	Creb3l2	208647	10090	1.3728e+08	14491200	7449280	9624080	13660800	4878440	10970240	9.38777e+06	0.855749	10020760	0.509918
	DAS45	D	2	NM_178661.2-850s1c1	TRCN0000084451	Creb3l2	208647	10090	1.3728e+08	7973920	7362600	7004360	10546080	5539680	7668260	7.69671e+06	1.00371	7685328	0.391077
	DAS45	F	4	NM_178661.3-1838s21c1	TRCN0000301785	Creb3l2	208647	10090	1.3728e+08	28078520	29903120	30657000	32177280	24146600	28990820	2.89936e+07	1.0001	28992504	1.47532
	DAS45	G	9	NM_178661.2-2143s1c1	TRCN0000084448	Creb3l2	208647	10090	1.3728e+08	13616320	9046760	1352400	3659080	876720	11331540	1.96273e+06	0.17321	5710256	0.290573
	DAS45	H	3	NM_178661.3-1320s21c1	TRCN0000301786	Creb3l2	208647	10090	1.3728e+08	18748640	6236720	2573040	14002720	4371000	12492680	6.98225e+06	0.558908	9186424	0.467462
	DAS42	A	12	NM_007792.4-369s21c1	TRCN0000304356	Csrp2	13008	10090	7.008e+07	17414160	8074480	6827040	12459680	4698240	12744320	7.99499e+06	0.627337	9894720	0.4365
	DAS42	G	6	NM_007792.4-564s21c1	TRCN0000315999	Csrp2	13008	10090	3.36e+07	25764040	25427080	19378680	24610080	20047680	25595560	21345480	0.833952	23045512	1.14222
	DAS42	G	8	NM_007792.4-460s21c1	TRCN0000310940	Csrp2	13008	10090	1.3728e+08	26246360	27792440	21473720	26836440	18403760	27019400	2.2238e+07	0.823037	24150544	1.13671
	DAS42	G	11	NM_007792.4-680s21c1	TRCN0000315921	Csrp2	13008	10090	1.1232e+08	28886040	31248080	25704240	32131640	28638840	30067060	2.88249e+07	0.958687	29321768	1.46911
	DAS42	H	7	NM_007792.2-249s1c1	TRCN0000075455	Csrp2	13008	10090	4.416e+07	23601920	25072200	15085440	24460400	11514160	24337060	17020000	0.699345	19946824	0.897176
	DAS41	A	12	NM_007803.1-694s1c1	TRCN0000108891	Cttn	13043	10090	1.3728e+08	19981280	22387520	20485160	17898440	20526280	21184400	1.96366e+07	0.926938	20255736	0.964431
	DAS41	C	1	NM_007803.1-576s1c1	TRCN0000108890	Cttn	13043	10090	1.3728e+08	16854360	10579080	9138040	12512520	7185360	13716720	9.61197e+06	0.700749	11253872	0.500009
	DAS41	E	3	NM_007803.4-319s21c1	TRCN0000335232	Cttn	13043	10090	1.3728e+08	20368000	21140120	16630200	14911640	15017920	20754060	15519920	0.747802	17613576	0.832418
	DAS41	H	1	NM_007803.1-1565s1c1	TRCN0000108892	Cttn	13043	10090	1.2192e+08	21697600	21665400	22142000	19891280	25361000	21681500	22464760	1.03613	22151456	1.04216
	DAS41	H	5	NM_007803.1-793s1c1	TRCN0000108893	Cttn	13043	10090	4.704e+07	20369800	23375160	14950840	14151600	18186760	21872480	1.57631e+07	0.72068	18206832	0.870841
	DAS36	A	4	NM_007806.3-464s21c1	TRCN0000240562	Cyba	13057	10090	1.3728e+08	12531120	21122840	19489520	22171440	19778560	16826980	20479840	1.21708	19018696	1.1053
	DAS36	A	6	NM_007806.3-417s21c1	TRCN0000245375	Cyba	13057	10090	4.416e+07	18241320	25257520	23419440	16200240	19465520	21749420	1.96951e+07	0.905544	20516808	1.19237
	DAS36	B	7	NM_007806.3-167s21c1	TRCN0000240564	Cyba	13057	10090	8.448e+07	8518360	17541440	16744320	16065560	18568280	13029900	1.71261e+07	1.31437	15487592	0.900085
	DAS36	C	1	NM_007806.3-515s21c1	TRCN0000240563	Cyba	13057	10090	6.432e+07	4282520	12876480	3229440	3100600	6749480	8579500	4359840	0.508169	6047704	0.351472
	DAS36	E	7	NM_007806.3-269s21c1	TRCN0000240565	Cyba	13057	10090	1.0464e+08	3314480	6308240	6133080	2966960	7044640	4811360	5381560	1.11851	5153480	0.299502
	DAS39	B	8	NM_146057.1-530s1c1	TRCN0000054493	Dap	223453	10090	1.3728e+08	16493920	20546760	16684200	18974200	14024680	18520340	1.6561e+07	0.894207	17344752	1.02253
	DAS39	E	3	NM_146057.1-261s1c1	TRCN0000054494	Dap	223453	10090	3840000	21589000	24384000	132600	147680	112800	22986500	131027	0.00570016	9273216	0.546689
	DAS39	F	2	NM_146057.1-368s1c1	TRCN0000054496	Dap	223453	10090	1.3728e+08	16484560	17443960	15770640	15778200	13286320	16964260	1.49451e+07	0.880973	15752736	0.928679
	DAS39	G	11	NM_146057.1-223s1c1	TRCN0000054495	Dap	223453	10090	1.3728e+08	14093160	17389560	11283120	7725000	10834160	15741360	9.94743e+06	0.631929	12265000	0.723065
	DAS39	H	3	NM_146057.1-277s1c1	TRCN0000054497	Dap	223453	10090	1.3728e+08	16826080	18819520	13255680	12736080	14456680	17822800	1.34828e+07	0.756492	15218808	0.897202
	DAS41	A	1	NM_013726.1-1274s1c1	TRCN0000088097	Dbf4	27214	10090	1.3728e+08	20292280	20373480	18845560	19059440	18690200	20332880	1.88651e+07	0.927811	19452192	0.915681
	DAS41	C	8	NM_013726.2-907s21c1	TRCN0000348194	Dbf4	27214	10090	4.8e+07	26388760	24867400	24161800	23804840	22341840	25628080	23436160	0.914472	24312928	1.13686
	DAS41	E	5	NM_013726.1-2110s1c1	TRCN0000088093	Dbf4	27214	10090	1.3728e+08	22564040	20870600	19974000	14004960	12792440	21717320	1.55905e+07	0.717882	18041208	0.840938
	DAS41	F	2	NM_013726.1-809s1c1	TRCN0000088096	Dbf4	27214	10090	1.3728e+08	14744400	18136720	11359040	12569320	7849240	16440560	1.05925e+07	0.644293	12931744	0.624449
	DAS41	G	1	NM_013726.2-1521s21c1	TRCN0000334054	Dbf4	27214	10090	1.3728e+08	18257040	21096760	15990440	12272720	14665800	19676900	1.43097e+07	0.727231	16456552	0.787705
	DAS45	B	2	NM_019813.3-251s21c1	TRCN0000335207	Dbn1	56320	10090	1.3728e+08	17298600	15640160	16866640	17987520	12523240	16469380	1.57925e+07	0.958899	16063232	0.817397
	DAS45	B	6	NM_019813.2-1851s1c1	TRCN0000090074	Dbn1	56320	10090	9.408e+07	27192920	19058800	25736320	27489760	11838600	23125860	2.16882e+07	0.937834	22263280	1.13289
	DAS45	C	11	NM_019813.3-835s21c1	TRCN0000335208	Dbn1	56320	10090	1.3728e+08	29608200	31604920	32393440	33653560	29615320	30606560	31887440	1.04185	31375088	1.59656
	DAS45	C	12	NM_019813.2-2331s1c1	TRCN0000090073	Dbn1	56320	10090	1.3728e+08	20062560	22858200	19540920	25542760	15807040	21460380	2.02969e+07	0.945785	20762296	1.05651
	DAS45	E	10	NM_019813.2-1522s1c1	TRCN0000090076	Dbn1	56320	10090	1.3728e+08	20560720	23559800	16026280	27899080	13391880	22060260	1.91057e+07	0.866071	20287552	1.03236
	DAS37	A	11	NM_010070.3-1364s1c1	TRCN0000088817	Dok1	13448	10090	1.3728e+08	14677680	9132080	1089880	8487720	2208000	11904880	3.92853e+06	0.329994	7119072	0.426381
	DAS37	D	4	NM_010070.4-1425s21c1	TRCN0000294903	Dok1	13448	10090	1.3728e+08	16836400	16729840	4330640	22301440	21019600	16783120	1.58839e+07	0.946421	16243584	0.972874
	DAS37	D	5	NM_010070.4-1496s21c1	TRCN0000294904	Dok1	13448	10090	1.3728e+08	8350680	9553480	2087080	9009880	4635600	8952080	5.24419e+06	0.585807	6727344	0.40292
	DAS37	E	6	NM_010070.3-926s1c1	TRCN0000088814	Dok1	13448	10090	1.3728e+08	15847840	17332560	7530960	18556000	17760320	16590200	14615760	0.880988	15405536	0.922681
	DAS37	H	8	NM_010070.4-158s21c1	TRCN0000287456	Dok1	13448	10090	1.1424e+08	19682000	22273480	10680240	20603920	16100440	20977740	1.57949e+07	0.752935	17868016	1.07017
	DAS45	C	4	NM_138677.2-1102s21c1	TRCN0000292911	Edem1	192193	10090	3.36e+07	3094200	2561640	562160	870840	479200	2827920	637400	0.225395	1513608	0.0770217
	DAS45	C	7	NM_138677.1-581s1c1	TRCN0000018468	Edem1	192193	10090	8.64e+07	23047400	28693120	18441920	32310040	20981680	25870260	2.39112e+07	0.924274	24694832	1.25663
	DAS45	D	9	NM_138677.2-1827s21c1	TRCN0000292909	Edem1	192193	10090	1.3728e+08	28857280	31637720	32522760	33765720	31100200	30247500	3.24629e+07	1.07324	31576736	1.60682
	DAS45	F	1	NM_138677.2-2004s21c1	TRCN0000292840	Edem1	192193	10090	0	8299800	3898880	1072120	6309880	570320	6099340	2.65077e+06	0.4346	4030200	0.205082
	DAS45	G	6	NM_138677.1-639s1c1	TRCN0000018469	Edem1	192193	10090	1.3728e+08	20081840	16486680	8506280	25888600	10906560	18284260	15100480	0.825873	16373992	0.83321
	DAS39	B	5	XM_134499.4-1472s1c1	TRCN0000027456	Ednra	13617	10090	1.3344e+08	21725320	23289800	22011520	24493320	18853280	22507560	21786040	0.967943	22074648	1.30138
	DAS39	C	12	XM_134499.4-1691s1c1	TRCN0000027476	Ednra	13617	10090	8.352e+07	10120520	14496160	7191160	7322240	3442760	12308340	5.98539e+06	0.486287	8514568	0.501964
	DAS39	E	2	XM_134499.4-509s1c1	TRCN0000027491	Ednra	13617	10090	1.3728e+08	7955800	11150840	7230560	3406400	2552320	9553320	4.39643e+06	0.460199	6459184	0.380792
	DAS39	E	5	XM_134499.4-722s1c1	TRCN0000027461	Ednra	13617	10090	7.296e+07	16149720	17581560	14125400	11858200	13942680	16865640	13308760	0.789105	14731512	0.868474
	DAS39	H	8	XM_134499.4-1034s1c1	TRCN0000027460	Ednra	13617	10090	6.624e+07	19332880	21590040	20110120	19881720	15116280	20461460	1.83694e+07	0.897755	19206208	1.13227
	DAS43	B	5	NM_025994.2-732s1c1	TRCN0000110683	Efhd2	27984	10090	1.3728e+08	13757080	20705920	4691480	1445120	4266400	17231500	3.46767e+06	0.20124	8973200	0.452126
	DAS43	B	11	NM_025994.2-309s1c1	TRCN0000110684	Efhd2	27984	10090	1.3728e+08	15542160	23473640	3119480	2211040	9203360	19507900	4.84463e+06	0.248342	10709936	0.539634
	DAS43	C	8	NM_025994.2-475s1c1	TRCN0000110682	Efhd2	27984	10090	1.0464e+08	27419720	31458520	16533880	4969240	21978120	29439120	1.44937e+07	0.492329	20471896	1.0315
	DAS43	D	4	NM_025994.2-346s1c1	TRCN0000110681	Efhd2	27984	10090	1.3728e+08	22418760	23146760	12998560	7754520	14302240	22782760	1.16851e+07	0.512892	16124168	0.812437
	DAS43	F	12	NM_025994.2-1932s1c1	TRCN0000110680	Efhd2	27984	10090	69120000	13627880	14843560	1245880	501640	2207680	14235720	1318400	0.0926121	6485328	0.326771
	DAS42	C	11	NM_010118.3-519s21c1	TRCN0000235775	Egr2	13654	10090	1.3728e+08	16197800	17116440	9040400	11739080	5123160	16657120	8.63421e+06	0.51835	11843376	0.545051
	DAS42	D	10	NM_010118.3-1545s21c1	TRCN0000235777	Egr2	13654	10090	1.2576e+08	15435560	14930400	7087640	15737280	5641240	15182980	9488720	0.624958	11766424	0.521126
	DAS42	E	1	NM_010118.1-1032s1c1	TRCN0000081679	Egr2	13654	10090	1.3728e+08	28102920	26631960	18144120	29113120	21778520	27367440	23011920	0.84085	24754128	1.22988
	DAS42	H	2	NM_010118.3-900s21c1	TRCN0000218224	Egr2	13654	10090	1.0176e+08	22502560	17268760	15514320	22805000	8554160	19885660	1.56245e+07	0.785717	17328960	0.711706
	DAS42	H	6	NM_010118.3-2699s21c1	TRCN0000235778	Egr2	13654	10090	1.3344e+08	19772640	18875400	11019400	14648240	9214680	19324020	11627440	0.601709	14706072	0.714181
	DAS45	A	11	NM_018781.2-168s21c1	TRCN0000449786	Egr3	13655	10090	1.3728e+08	22798760	19118720	15734760	26353520	16830640	20958740	19639640	0.937062	20167280	1.02624
	DAS45	B	4	NM_018781.1-1170s1c1	TRCN0000096139	Egr3	13655	10090	1.3728e+08	22058920	13479080	10681920	10451640	6386480	17769000	9.17335e+06	0.516256	12611608	0.641757
	DAS45	B	5	NM_018781.1-131s1c1	TRCN0000096142	Egr3	13655	10090	1.3728e+08	26650640	27832200	31518200	29805000	21902200	27241420	27741800	1.01837	27541648	1.40149
	DAS45	C	2	NM_018781.2-609s21c1	TRCN0000442315	Egr3	13655	10090	1.2864e+08	24996280	21905200	27338280	26534560	17480120	23450740	23784320	1.01422	23650888	1.2035
	DAS45	D	1	NM_018781.1-191s1c1	TRCN0000096141	Egr3	13655	10090	1.3728e+08	21881720	25822720	25244920	25921440	19840680	23852220	2.3669e+07	0.992319	23742296	1.20816
	DAS37	B	11	NM_007960.1-1347s1c1	TRCN0000075476	Etv1	14009	10090	1.3728e+08	16330480	13769000	5846960	15768200	11497240	15049740	1.10375e+07	0.733399	12642376	0.757188
	DAS37	D	12	NM_007960.1-422s1c1	TRCN0000075474	Etv1	14009	10090	1.3728e+08	15327000	14397160	9545160	20885360	14482320	14862080	1.49709e+07	1.00733	14927400	0.894044
	DAS37	E	10	NM_007960.1-1344s1c1	TRCN0000075475	Etv1	14009	10090	1.3728e+08	21228280	24976520	16237400	26476440	21871120	23102400	21528320	0.931865	22157952	1.3271
	DAS37	G	7	NM_007960.1-1241s1c1	TRCN0000075477	Etv1	14009	10090	1.3536e+08	16942960	22133040	18945600	21883200	19257600	19538000	20028800	1.02512	19832480	1.18782
	DAS37	G	9	NM_007960.1-2448s1c1	TRCN0000075473	Etv1	14009	10090	1.3728e+08	26847360	29721560	28320480	32535800	31222040	28284460	3.06928e+07	1.08515	29729448	1.78058
	DAS38	A	7	NM_009510.1-497s1c1	TRCN0000071886	Ezr	22350	10090	1.3728e+08	13482040	15893080	14139800	7131360	5913000	14687560	9.06139e+06	0.616943	11311856	0.572527
	DAS38	B	3	NM_009510.1-759s1c1	TRCN0000071887	Ezr	22350	10090	1.3728e+08	18728000	24306760	20905400	16538360	18495880	21517380	1.86465e+07	0.866581	19794880	1.00188
	DAS38	C	12	NM_009510.2-2231s21c1	TRCN0000348506	Ezr	22350	10090	1.3728e+08	26648680	24859640	28891120	21635880	24754200	25754160	2.50937e+07	0.974357	25357904	1.28344
	DAS38	E	4	NM_009510.1-914s1c1	TRCN0000071883	Ezr	22350	10090	1.3728e+08	5237600	16432920	11398680	3248960	2816760	10835260	5.82147e+06	0.537271	7826984	0.396147
	DAS38	F	7	NM_009510.1-1521s1c1	TRCN0000071884	Ezr	22350	10090	1.3728e+08	20349720	23928120	19008240	8087000	4243360	22138920	10446200	0.471848	15123288	0.765434
	DAS44	B	5	NM_007974.2-2279s1c1	TRCN0000026630	F2rl1	14063	10090	1.2e+08	22585000	26465800	21251600	22355520	11677720	24525400	18428280	0.751396	20867128	1.021
	DAS44	C	4	NM_007974.2-1025s1c1	TRCN0000026645	F2rl1	14063	10090	1.3728e+08	26167000	25865200	21280640	21534440	15182520	26016100	1.93325e+07	0.743099	22005960	1.07672
	DAS44	C	10	NM_007974.2-513s1c1	TRCN0000026627	F2rl1	14063	10090	9.504e+07	18555280	21990880	12628840	10308680	10542880	20273080	1.11601e+07	0.55049	14805312	0.724403
	DAS44	D	6	NM_007974.2-1198s1c1	TRCN0000026616	F2rl1	14063	10090	1.1616e+08	25537520	24984000	22528920	21926080	15137680	25260760	1.98642e+07	0.786367	22022840	1.07755
	DAS44	D	12	NM_007974.2-1255s1c1	TRCN0000026643	F2rl1	14063	10090	8.064e+07	17038680	16404200	11121120	11700400	7038520	16721440	9.95335e+06	0.595245	12660584	0.619464
	DAS40	A	8	NM_024169.2-297s1c1	TRCN0000111834	Fkbp11	66120	10090	7.296e+07	15170760	17994960	6176920	10364400	7448840	16582860	7996720	0.482228	11431176	0.646308
	DAS40	D	1	NM_024169.2-537s1c1	TRCN0000111831	Fkbp11	66120	10090	7.488e+07	17699320	21754240	17024520	16414640	15655760	19726780	1.6365e+07	0.829582	17709696	1.00129
	DAS40	D	11	NM_024169.2-449s1c1	TRCN0000111833	Fkbp11	66120	10090	1.0848e+08	16552400	17545600	12760040	15831960	17773880	17049000	1.54553e+07	0.906522	16092776	0.909871
	DAS40	F	8	NM_024169.2-337s1c1	TRCN0000111832	Fkbp11	66120	10090	1.3728e+08	22068160	22296120	22138520	21552640	23857880	22182140	2.25163e+07	1.01507	22382664	1.2655
	DAS40	H	3	NM_024169.2-314s1c1	TRCN0000111830	Fkbp11	66120	10090	1.1136e+08	10158480	15626880	7974800	10166080	6567600	12892680	8236160	0.638825	10098768	0.570975
	DAS40	C	4	XM_129845.3-8108s1c1	TRCN0000090368	Fn1	14268	10090	6.72e+07	16091320	17833320	9182360	12321640	11757400	16962320	1.10871e+07	0.653633	13437208	0.759727
	DAS40	D	3	XM_129845.3-5056s1c1	TRCN0000090372	Fn1	14268	10090	3.936e+07	21590200	22045560	13701480	13455720	12589760	21817880	1.3249e+07	0.607254	16676544	0.942877
	DAS40	D	7	NM_010233.1-4872s21c1	TRCN0000306574	Fn1	14268	10090	1.3728e+08	20836720	18151320	23176160	13288000	19094680	19494020	1.85196e+07	0.950015	18909376	1.06912
	DAS40	G	2	NM_010233.1-1050s21c1	TRCN0000306639	Fn1	14268	10090	1.3728e+08	7330880	9597320	3723720	8892280	5248400	8464100	5954800	0.703536	6958520	0.393428
	DAS40	G	10	XM_129845.3-3050s1c1	TRCN0000090371	Fn1	14268	10090	1920000	23114680	24870040	300000	252400	147360	23992360	233253	0.00972198	9736896	0.550515
	DAS42	A	11	NM_010237.2-2368s21c1	TRCN0000274572	Frk	14302	10090	1.0944e+08	11931560	9951480	6484040	13605000	8794480	10941520	9627840	0.879936	10153312	0.493893
	DAS42	B	3	NM_010237.2-1791s21c1	TRCN0000274574	Frk	14302	10090	9.408e+07	24281080	18448480	9717920	14551400	9981440	21364780	11416920	0.53438	15396064	0.784439
	DAS42	D	11	NM_010237.2-1038s1c1	TRCN0000023322	Frk	14302	10090	1.632e+07	28069920	26533040	25776480	29347400	24787080	27301480	2.6637e+07	0.975661	26902784	1.30352
	DAS42	F	8	NM_010237.2-1248s21c1	TRCN0000274515	Frk	14302	10090	1.3728e+08	28398720	26718600	26328080	28556320	22386800	27558660	2.57571e+07	0.934627	26477704	1.24988
	DAS42	H	3	NM_010237.2-1370s21c1	TRCN0000274516	Frk	14302	10090	122880000	21713200	19882080	8228000	17446480	5862040	20797640	1.05122e+07	0.50545	14626360	0.667158
	DAS38	D	8	NM_007984.1-1299s1c1	TRCN0000108927	Fscn1	14086	10090	1.3728e+08	23190440	25830400	23562680	19954080	14826920	24510420	1.94479e+07	0.793454	21472904	1.08681
	DAS38	D	9	NM_007984.1-1593s1c1	TRCN0000108925	Fscn1	14086	10090	1.3728e+08	8412680	13469480	9019000	8156440	3700440	10941080	6.95863e+06	0.636009	8551608	0.432822
	DAS38	D	11	NM_007984.2-1083s21c1	TRCN0000374960	Fscn1	14086	10090	1.3728e+08	17480200	20473560	20537920	17140240	14570520	18976880	1.74162e+07	0.91776	18040488	0.913083
	DAS38	F	5	NM_007984.1-181s1c1	TRCN0000108928	Fscn1	14086	10090	1.3728e+08	25065000	24693800	21593760	18142360	15725840	24879400	18487320	0.743077	21044152	1.06511
	DAS38	H	4	NM_007984.2-1465s21c1	TRCN0000363835	Fscn1	14086	10090	1.3728e+08	19522320	22853600	27277280	19148080	20092720	21187960	2.21727e+07	1.04648	21778800	1.10229
	DAS45	A	2	NM_010253.2-400s1c1	TRCN0000180478	Gal	14419	10090	5.664e+07	19959960	17641640	14150720	17696920	10636520	18800800	1.41614e+07	0.753233	16017152	0.815052
	DAS45	A	6	NM_010253.3-289s21c1	TRCN0000240596	Gal	14419	10090	69120000	15919000	13144720	7749080	17553440	3931360	14531860	9.74463e+06	0.67057	11659520	0.593309
	DAS45	A	10	NM_010253.3-401s21c1	TRCN0000240598	Gal	14419	10090	76800000	14173440	11038200	11538400	12954840	8067920	12605820	10853720	0.861009	11554560	0.587968
	DAS45	E	12	NM_010253.3-325s21c1	TRCN0000240595	Gal	14419	10090	0	22356680	17420840	17359440	27302600	13687360	19888760	19449800	0.977929	19625384	0.998661
	DAS45	G	1	NM_010253.3-287s1c1	TRCN0000215311	Gal	14419	10090	1.3728e+08	16686920	14798720	6490160	10102840	5386560	15742820	7326520	0.465388	10693040	0.544128
	DAS42	A	1	NM_016722.3-760s21c1	TRCN0000294888	Galns	50917	10090	1.1136e+08	25211200	21892880	19015400	65840	16910160	23552040	1.19971e+07	0.509388	16619096	1.01257
	DAS42	B	5	NM_016722.3-1844s21c1	TRCN0000287393	Galns	50917	10090	1.2672e+08	23279200	18134400	20487600	21841120	19225520	20706800	20518080	0.990886	20593568	0.999306
	DAS42	C	4	NM_016722.3-206s21c1	TRCN0000287394	Galns	50917	10090	1.3728e+08	18557240	14593680	8879520	14099480	13552000	16575460	12177000	0.73464	13936384	0.753939
	DAS42	C	6	NM_016722.2-453s1c1	TRCN0000101806	Galns	50917	10090	0	25543560	23618360	19939400	26030840	17094080	24580960	21021440	0.855192	22445248	1.04292
	DAS42	D	5	NM_016722.3-96s21c1	TRCN0000287395	Galns	50917	10090	1.3728e+08	11411240	11328560	3192840	7840120	1256080	11369900	4.09635e+06	0.36028	7005768	0.315965
	DAS40	B	12	NM_030228.2-636s21c1	TRCN0000247527	Gas2l1	78926	10090	1.2e+08	17830520	16969720	14075400	10094480	15991200	17400120	1.3387e+07	0.769364	14992264	0.847649
	DAS40	F	2	NM_030228.2-134s21c1	TRCN0000247526	Gas2l1	78926	10090	1.3728e+08	18870640	18206200	19637080	19381280	21170080	18538420	2.00628e+07	1.08223	19453056	1.09986
	DAS40	F	11	NM_030228.2-702s21c1	TRCN0000247528	Gas2l1	78926	10090	1.3728e+08	10776080	12837880	11280040	8334160	11023000	11806980	10212400	0.864946	10850232	0.613462
	DAS40	G	9	NM_030228.2-382s21c1	TRCN0000247529	Gas2l1	78926	10090	1.3728e+08	18795880	20870640	18067000	19566560	11872400	19833260	1.6502e+07	0.832036	17834496	1.00835
	DAS40	H	1	NM_030228.1-2449s1c1	TRCN0000198513	Gas2l1	78926	10090	1.1616e+08	15883880	16093120	17119880	17459640	12936040	15988500	15838520	0.99062	15898512	0.898887
	DAS40	A	6	NM_010276.1-1638s1c1	TRCN0000102650	Gem	14579	10090	7.584e+07	17603960	25205600	15886440	21410400	17380920	21404780	18225920	0.851488	19497464	1.10237
	DAS40	B	6	NM_010276.1-338s1c1	TRCN0000102652	Gem	14579	10090	2.784e+07	20669360	19211520	14700080	11836120	15490400	19940440	1.40089e+07	0.702535	16381496	0.926195
	DAS40	B	7	NM_010276.1-446s1c1	TRCN0000102653	Gem	14579	10090	5.568e+07	22131760	28012920	26612240	21324520	24824600	25072340	2.42538e+07	0.967352	24581208	1.3898
	DAS40	B	8	NM_010276.1-948s1c1	TRCN0000102654	Gem	14579	10090	8.64e+07	19754760	19610480	17125360	11680880	19239720	19682620	16015320	0.813678	17482240	0.98843
	DAS40	F	5	NM_010276.1-572s1c1	TRCN0000102651	Gem	14579	10090	6.528e+07	22027640	25728800	21894000	22584960	20340640	23878220	2.16065e+07	0.904864	22515208	1.27299
	DAS42	C	2	NM_008122.3-1103s21c1	TRCN0000319673	Gjc1	14615	10090	1.3728e+08	26447560	19540680	19258640	23508280	17276480	22994120	2.00145e+07	0.870417	21206328	1.00777
	DAS42	C	10	NM_008122.1-1176s1c1	TRCN0000068642	Gjc1	14615	10090	6.72e+07	25667160	21744400	15363920	27251000	11809240	23705780	1.81414e+07	0.765273	20367144	0.888763
	DAS42	F	11	NM_008122.3-1641s21c1	TRCN0000319671	Gjc1	14615	10090	9.312e+07	25612560	26521240	24595040	25631200	19656760	26066900	2.32943e+07	0.893637	24403360	1.14423
	DAS42	G	4	NM_008122.3-2271s21c1	TRCN0000319672	Gjc1	14615	10090	1.3728e+08	27579960	26555400	25160240	27119200	22100600	27067680	2.47933e+07	0.915976	25703080	1.23044
	DAS42	G	12	NM_008122.3-872s21c1	TRCN0000319610	Gjc1	14615	10090	1.2096e+08	22340040	21419760	13145640	24470840	12842720	21879900	1.68197e+07	0.76873	18843800	0.868933
	DAS38	C	6	NM_028608.3-652s21c1	TRCN0000305085	Glipr1	73690	10090	1.3728e+08	18737240	22184920	21804840	18240680	11332960	20461080	17126160	0.837012	18460128	0.934322
	DAS38	D	3	NM_028608.3-681s21c1	TRCN0000308632	Glipr1	73690	10090	1.3728e+08	21220360	21183680	25252960	21672720	18716520	21202020	2.18807e+07	1.03201	21609248	1.09371
	DAS38	D	4	NM_028608.3-483s21c1	TRCN0000308631	Glipr1	73690	10090	1.3728e+08	6989320	19783360	11221000	5572880	2874040	13386340	6.55597e+06	0.489751	9288120	0.470099
	DAS38	E	5	NM_028608.3-524s21c1	TRCN0000305079	Glipr1	73690	10090	1.3728e+08	17115280	24212480	25236560	17746600	15342240	20663880	19441800	0.940859	19930632	1.00875
	DAS38	G	7	NM_028608.3-623s21c1	TRCN0000305143	Glipr1	73690	10090	1.3728e+08	15595840	21661360	15505560	8045760	3087600	18628600	8879640	0.476667	12779224	0.646794
	DAS38	A	2	NM_008142.3-51s21c1	TRCN0000301619	Gnb1	14688	10090	1.3728e+08	23834240	25688240	23923560	22358160	18770960	24761240	2.16842e+07	0.875733	22915032	1.1598
	DAS38	A	9	NM_008142.3-86s21c1	TRCN0000301618	Gnb1	14688	10090	1.3728e+08	23157040	24883760	21868720	17159920	17771560	24020400	18933400	0.788222	20968200	1.06126
	DAS38	A	11	NM_008142.2-1481s1c1	TRCN0000034429	Gnb1	14688	10090	1.3728e+08	18892880	18752480	15163480	12444360	8912680	18822680	1.21735e+07	0.646747	14833176	0.750751
	DAS38	C	1	NM_008142.3-524s21c1	TRCN0000301617	Gnb1	14688	10090	1.3728e+08	11252600	15993200	14937960	6480520	5349320	13622900	8922600	0.654971	10802720	0.546758
	DAS38	F	12	NM_008142.3-791s21c1	TRCN0000301616	Gnb1	14688	10090	1.3728e+08	17492240	20774040	21975600	13515880	8757480	19133140	1.47497e+07	0.770896	16503048	0.835268
	DAS41	B	2	NM_031999.2-447s21c1	TRCN0000243491	Gpr137b	83924	10090	1.3728e+08	18146600	17507760	10632920	16613400	13939040	17827180	1.37285e+07	0.770086	15367944	0.720114
	DAS41	C	10	NM_031999.2-249s21c1	TRCN0000241828	Gpr137b	83924	10090	1.3728e+08	25461320	26864040	24529680	24415800	22050400	26162680	2.36653e+07	0.904544	24664248	1.16715
	DAS41	E	8	NM_031999.1-497s1c1	TRCN0000173595	Gpr137b	83924	10090	1.056e+08	17895360	20234040	14332760	14249640	7666560	19064700	1.2083e+07	0.633788	14875672	0.710961
	DAS41	F	4	NM_031999.2-2700s21c1	TRCN0000243489	Gpr137b	83924	10090	1.3728e+08	16839720	14610520	3759640	5721640	4232680	15725120	4571320	0.290702	9032840	0.41454
	DAS41	F	11	NM_031999.2-464s21c1	TRCN0000241829	Gpr137b	83924	10090	1.1904e+08	23542560	22753000	21030120	21040760	17357800	23147780	19809560	0.855787	21144848	0.991229
	DAS39	A	5	NM_011824.3-567s1c1	TRCN0000098303	Grem1	23892	10090	9.216e+07	18578080	20660320	18669280	21781880	14192960	19619200	1.82147e+07	0.928412	18776504	1.10694
	DAS39	C	5	NM_011824.3-413s1c1	TRCN0000098301	Grem1	23892	10090	1.3728e+08	14608440	18989640	9543680	11503080	10189680	16799040	1.04121e+07	0.619806	12966904	0.764445
	DAS39	C	10	NM_011824.3-771s1c1	TRCN0000098300	Grem1	23892	10090	1.3728e+08	4667040	13039920	6384320	4825720	2722960	8853480	4.64433e+06	0.524577	6327992	0.373057
	DAS39	F	7	NM_011824.3-685s1c1	TRCN0000098302	Grem1	23892	10090	1.3728e+08	21634600	23104440	22384840	18735560	19214240	22369520	2.01115e+07	0.89906	21014736	1.23889
	DAS39	F	8	NM_011824.3-422s1c1	TRCN0000098304	Grem1	23892	10090	8.352e+07	19216000	22847840	21980840	20869400	18234920	21031920	20361720	0.968134	20629800	1.2162
	DAS39	D	5	NM_026231.2-692s1c1	TRCN0000097431	Gstcd	67553	10090	1.1904e+08	21790640	18684520	15978160	14719840	11727840	20237580	1.41419e+07	0.698796	16580200	0.977461
	DAS39	D	11	NM_026231.2-2356s1c1	TRCN0000097429	Gstcd	67553	10090	122880000	22516880	24810280	26890800	23766280	19995800	23663580	23550960	0.995241	23596008	1.39107
	DAS39	E	8	NM_026231.2-1122s1c1	TRCN0000097430	Gstcd	67553	10090	1.3728e+08	15047520	12628200	10129080	9797080	8514680	13837860	9480280	0.685097	11223312	0.661654
	DAS39	F	11	NM_026231.2-1310s1c1	TRCN0000097433	Gstcd	67553	10090	1.3728e+08	14386760	13864120	7585520	1912440	3240480	14125440	4.24615e+06	0.300603	8197864	0.483293
	DAS39	G	4	NM_026231.2-1583s1c1	TRCN0000097432	Gstcd	67553	10090	1.3728e+08	20783040	22897320	24016360	24088600	18969520	21840180	22358160	1.02372	22150968	1.30588
	DAS41	A	6	NM_008216.3-1520s21c1	TRCN0000337811	Has2	15117	10090	1.3728e+08	10340680	15708000	12546800	11883320	11133680	13024340	11854600	0.910188	12322496	0.605075
	DAS41	C	12	NM_008216.3-946s21c1	TRCN0000337829	Has2	15117	10090	1.3728e+08	7586400	14631160	13822360	3611120	7598800	11108780	8.34409e+06	0.751126	9449968	0.477805
	DAS41	D	3	NM_008216.2-888s1c1	TRCN0000076276	Has2	15117	10090	1.3728e+08	12482640	3760280	1936560	1402880	931680	8121460	1.42371e+06	0.175302	4102808	0.152011
	DAS41	F	12	NM_008216.3-838s21c1	TRCN0000337814	Has2	15117	10090	1.1808e+08	18400800	18865720	17008400	16651720	16806320	18633260	1.68221e+07	0.902802	17546592	0.827821
	DAS41	G	12	NM_008216.3-2417s21c1	TRCN0000337813	Has2	15117	10090	1.3728e+08	22984200	22023120	20804040	22366440	21227080	22503660	2.14659e+07	0.953883	21880976	1.02506
	DAS44	C	7	NM_008234.2-1010s1c1	TRCN0000039048	Hells	15201	10090	1.3728e+08	28644160	28989600	26538920	27367040	17205160	28816880	2.37037e+07	0.822563	25748976	1.25986
	DAS44	D	9	NM_008234.2-1177s1c1	TRCN0000039044	Hells	15201	10090	1.3728e+08	25641720	25358840	20795560	21173600	13293800	25500280	1.8421e+07	0.722384	21252704	1.03986
	DAS44	E	11	NM_008234.3-1867s21c1	TRCN0000304507	Hells	15201	10090	1.3728e+08	22091800	20338560	19659000	18396080	12175320	21215180	1.67435e+07	0.789221	18532152	0.906751
	DAS44	F	6	NM_008234.3-549s21c1	TRCN0000331756	Hells	15201	10090	1.3728e+08	23781960	23175880	20321920	17923600	10346920	23478920	16197480	0.689873	19110056	0.935027
	DAS44	G	3	NM_008234.2-1766s1c1	TRCN0000039045	Hells	15201	10090	9.408e+07	25837720	24520480	19074640	19832720	15676960	25179100	1.81948e+07	0.722614	20988504	1.02694
	DAS43	C	9	XM_486109.1-885s1c1	TRCN0000075583	Hmgb2	97165	10090	8.64e+07	18496040	15780560	656400	460880	1048120	17138300	721800	0.0421162	7288400	0.367235
	DAS43	D	5	NM_008252.2-519s21c1	TRCN0000304268	Hmgb2	97165	10090	1.2192e+08	17331400	20864360	5965040	1905960	14178840	19097880	7.34995e+06	0.384857	12049120	0.60711
	DAS43	D	6	NM_008252.2-682s21c1	TRCN0000310863	Hmgb2	97165	10090	1.3728e+08	18309920	24302560	9557320	663120	13093720	21306240	7.77139e+06	0.364747	13185328	0.664359
	DAS43	H	3	NM_008252.2-348s21c1	TRCN0000304269	Hmgb2	97165	10090	1.3728e+08	24210600	25956360	22504880	16615920	21554360	25083480	2.02251e+07	0.80631	22168424	1.11698
	DAS43	H	4	XM_486109.1-787s1c1	TRCN0000075587	Hmgb2	97165	10090	6.528e+07	20467960	23253280	5470760	2914680	4255600	21860620	4213680	0.192752	11272456	0.567977
	DAS38	C	4	NM_008255.1-274s1c1	TRCN0000173635	Hmgcr	15357	10090	1.3728e+08	19502760	24519680	20978160	17620920	19505840	22011220	1.93683e+07	0.879929	20425472	1.03379
	DAS38	C	5	NM_008255.1-815s1c1	TRCN0000173543	Hmgcr	15357	10090	1.3728e+08	19745280	21381120	19336960	15434560	11754960	20563200	1.55088e+07	0.754203	17530576	0.887274
	DAS38	G	10	NM_008255.1-470s1c1	TRCN0000173464	Hmgcr	15357	10090	1.3728e+08	17735400	19320800	13890600	11231040	8624520	18528100	11248720	0.607117	14160472	0.716703
	DAS38	H	5	NM_008255.1-1024s1c1	TRCN0000173340	Hmgcr	15357	10090	1.3728e+08	14069280	16889400	5474480	2365360	2411920	15479340	3.41725e+06	0.220762	8242088	0.417156
	DAS38	H	6	NM_008255.1-3201s1c1	TRCN0000173307	Hmgcr	15357	10090	1.3728e+08	21389520	23411200	23863920	18476280	20767600	22400360	2.10359e+07	0.939089	21581704	1.09231
	DAS43	B	10	NM_133662.2-435s21c1	TRCN0000353512	Ier3	15937	10090	1.2096e+08	21146680	24865360	15327400	11392680	19488360	23006020	1.54028e+07	0.669512	18444096	0.929329
	DAS43	B	12	NM_133662.1-578s1c1	TRCN0000175403	Ier3	15937	10090	5.568e+07	20401440	19279560	8920920	10737280	14573840	19840500	11410680	0.575121	14782608	0.74484
	DAS43	C	3	NM_133662.2-496s21c1	TRCN0000336543	Ier3	15937	10090	1.3728e+08	20264720	23570440	12059840	7080320	18987600	21917580	1.27093e+07	0.579866	16392584	0.825961
	DAS43	C	5	NM_133662.1-760s1c2	TRCN0000193083	Ier3	15937	10090	1.3728e+08	20691520	23885480	15147000	8565080	19928560	22288500	14546880	0.652663	17643528	0.888991
	DAS43	C	7	NM_133662.2-784s21c1	TRCN0000375069	Ier3	15937	10090	1.3728e+08	29097800	31434880	31397800	24569200	33278480	30266340	2.97485e+07	0.98289	29955632	1.50935
	DAS39	A	9	NM_025841.1-391s1c1	TRCN0000093585	Kdelr2	66913	10090	6.528e+07	14221520	16954840	9675800	11081120	6550880	15588180	9102600	0.583942	11696832	0.689569
	DAS39	A	11	NM_025841.1-698s1c1	TRCN0000093587	Kdelr2	66913	10090	69120000	16023120	19445200	9826160	13261880	5200720	17734160	9.42959e+06	0.531719	12751416	0.751741
	DAS39	D	4	NM_025841.1-185s1c1	TRCN0000093586	Kdelr2	66913	10090	1.3728e+08	4785080	5803760	1632680	1091280	791080	5294420	1171680	0.221305	2820776	0.166295
	DAS39	D	7	NM_025841.1-1080s1c1	TRCN0000093584	Kdelr2	66913	10090	1.3728e+08	21527600	24825920	23350200	23651240	21151360	23176760	22717600	0.980189	22901264	1.35011
	DAS39	D	10	NM_025841.1-360s1c1	TRCN0000093588	Kdelr2	66913	10090	8.832e+07	13904800	11519840	9853480	3817680	4082640	12712320	5.91793e+06	0.465527	8635688	0.509104
	DAS37	C	5	NM_010688.4-248s21c1	TRCN0000301418	Lasp1	16796	10090	1.3728e+08	21689240	25146600	18545680	26265920	22433000	23417920	2.24149e+07	0.957167	22816088	1.36652
	DAS37	C	12	NM_010688.2-2493s1c1	TRCN0000075563	Lasp1	16796	10090	1.3728e+08	11585400	14039400	5151280	14295360	14056520	12812400	11167720	0.871634	11825592	0.708268
	DAS37	E	9	NM_010688.2-373s1c1	TRCN0000075566	Lasp1	16796	10090	1.248e+08	7099600	7738760	985920	6507840	3825680	7419180	3.77315e+06	0.508567	5231560	0.313333
	DAS37	F	7	NM_010688.2-274s1c1	TRCN0000075564	Lasp1	16796	10090	1.0848e+08	4772880	14750520	1837840	3711160	2027280	9761700	2.52543e+06	0.258708	5419936	0.324615
	DAS37	F	10	NM_010688.2-462s1c1	TRCN0000075565	Lasp1	16796	10090	8.352e+07	8086160	10221280	2352200	2710160	2155320	9153720	2.40589e+06	0.262832	5105024	0.305754
	DAS40	C	10	NM_029999.3-261s1c1	TRCN0000095612	Lbh	77889	10090	1.008e+08	22092360	24894720	20428760	21654920	21857240	23493540	21313640	0.907213	22185600	1.25435
	DAS40	D	2	NM_029999.3-1832s1c1	TRCN0000095609	Lbh	77889	10090	7.968e+07	20712200	21074400	22079080	18037960	20574760	20893300	20230600	0.968282	20495680	1.15881
	DAS40	E	8	NM_029999.3-496s1c1	TRCN0000095611	Lbh	77889	10090	5.568e+07	17681040	20266600	9548560	10992040	12774560	18973820	1.11051e+07	0.585283	14252560	0.805827
	DAS40	E	11	NM_029999.3-301s1c1	TRCN0000095610	Lbh	77889	10090	1.0656e+08	16970080	18180240	14899600	13232560	9783680	17575160	1.26386e+07	0.719118	14613232	0.826219
	DAS40	F	12	NM_029999.3-334s1c1	TRCN0000095613	Lbh	77889	10090	9.792e+07	15652200	19080960	11362080	11730480	10918320	17366580	11336960	0.652803	13748808	0.777345
	DAS42	B	7	NM_008515.1-993s1c1	TRCN0000102228	Lrrfip1	16978	10090	3.264e+07	27845920	26442280	20727080	27226320	17100160	27144100	21684520	0.798867	23868352	1.10721
	DAS42	D	7	NM_008515.4-1820s21c1	TRCN0000351054	Lrrfip1	16978	10090	1.3728e+08	6480880	8468040	1363960	8260120	5137920	7474460	4.92067e+06	0.658331	5942184	0.315625
	DAS42	D	8	NM_008515.4-1498s21c1	TRCN0000340251	Lrrfip1	16978	10090	1.3728e+08	7724560	12847120	5311280	7592080	4255120	10285840	5.71949e+06	0.556055	7546032	0.363887
	DAS42	D	12	NM_008515.4-2595s21c1	TRCN0000340252	Lrrfip1	16978	10090	1.248e+08	17442240	9695400	12557680	16839560	7991880	13568820	12463040	0.918506	12905352	0.539556
	DAS42	F	2	NM_008515.4-534s21c1	TRCN0000340185	Lrrfip1	16978	10090	1.3728e+08	10843920	14259000	1183520	10469480	3987600	12551460	5.21353e+06	0.415373	8148704	0.41389
	DAS42	A	6	NM_010807.2-1293s1c1	TRCN0000198654	Marcksl1	17357	10090	1.3728e+08	15448200	5898880	5716480	14444000	3720040	10673540	7.96017e+06	0.745786	9045520	0.360199
	DAS42	C	1	NM_010807.3-996s21c1	TRCN0000336432	Marcksl1	17357	10090	1.3728e+08	23608280	23071760	16293920	19097840	14600640	23340020	1.66641e+07	0.713973	19334488	0.949465
	DAS42	D	2	NM_010807.2-285s1c1	TRCN0000200186	Marcksl1	17357	10090	1.3728e+08	24697200	20128000	19585080	24593840	17114720	22412600	2.04312e+07	0.911595	21223768	0.989171
	DAS42	E	8	NM_010807.2-443s1c1	TRCN0000176619	Marcksl1	17357	10090	1.3728e+08	32137280	32049760	29656040	33192680	27773960	32093520	30207560	0.941235	30961944	1.49818
	DAS42	F	9	NM_010807.2-1399s1c1	TRCN0000177817	Marcksl1	17357	10090	122880000	26450240	27204800	22858240	28922560	14872680	26827520	2.22178e+07	0.828173	24061704	1.04355
	DAS39	A	6	NM_008567.1-1337s1c1	TRCN0000124141	Mcm6	17219	10090	4.992e+07	15945960	19363880	16182760	20162640	11987880	17654920	1.61111e+07	0.912555	16728624	0.986211
	DAS39	A	7	NM_008567.1-1055s1c1	TRCN0000124142	Mcm6	17219	10090	4.704e+07	17849560	19947840	12325320	12935920	10246520	18898700	11835920	0.626282	14661032	0.864319
	DAS39	D	2	NM_008567.1-2745s1c1	TRCN0000124139	Mcm6	17219	10090	1.008e+08	7983800	13537600	1286080	1533960	1296640	10760700	1.37223e+06	0.127522	5127616	0.302291
	DAS39	E	6	NM_008567.1-2521s1c1	TRCN0000124143	Mcm6	17219	10090	5.472e+07	9972440	17670680	7736560	5046840	4153440	13821560	5.64561e+06	0.408464	8915992	0.525629
	DAS39	E	7	NM_008567.1-1611s1c1	TRCN0000124140	Mcm6	17219	10090	7.296e+07	15220120	13248800	11248840	12761840	11576280	14234460	11862320	0.833352	12811176	0.755264
	DAS41	C	7	NM_001001880.1-263s1c1	TRCN0000091520	Mpzl1	68481	10090	6.528e+07	30875880	30630800	29073760	27181640	27743920	30753340	2.79998e+07	0.910463	29101200	1.36817
	DAS41	D	8	NM_001001880.1-523s1c1	TRCN0000091521	Mpzl1	68481	10090	34560000	23716880	24159840	12448520	14114600	13160120	23938360	13241080	0.553132	17519992	0.826466
	DAS41	E	2	NM_001001880.1-319s1c1	TRCN0000091522	Mpzl1	68481	10090	9600000	26843120	25903000	15067040	4286240	12928080	26373060	1.07605e+07	0.408009	17005496	0.795749
	DAS41	E	11	NM_001001880.1-752s1c1	TRCN0000091519	Mpzl1	68481	10090	1.3728e+08	25429920	23349680	21333160	19004760	11989360	24389800	1.74424e+07	0.715153	20221376	0.941703
	DAS40	B	1	NM_010863.2-3626s21c1	TRCN0000302721	Myo1b	17912	10090	1.3536e+08	18625480	20601600	19776240	18008000	19121440	19613540	18968560	0.967116	19226552	1.08705
	DAS40	B	11	NM_010863.2-2324s21c1	TRCN0000302792	Myo1b	17912	10090	1.3728e+08	12141760	8577400	4423320	2241520	7681920	10359580	4.78225e+06	0.461626	7013184	0.396519
	DAS40	C	11	NM_010863.2-3321s21c1	TRCN0000302794	Myo1b	17912	10090	1.3728e+08	14381720	20795440	17833840	17619360	19806600	17588580	1.84199e+07	1.04727	18087392	1.02264
	DAS40	F	6	NM_010863.2-396s21c1	TRCN0000302793	Myo1b	17912	10090	1.3728e+08	18242200	22013840	19716240	20200360	18888680	20128020	19601760	0.973854	19812264	1.12017
	DAS40	H	8	NM_010863.2-1168s21c1	TRCN0000302795	Myo1b	17912	10090	7.104e+07	15983280	19253360	16957000	18366880	13045280	17618320	1.61231e+07	0.91513	16721160	0.945399
	DAS43	A	10	NM_015742.2-1620s21c1	TRCN0000362423	Myo9b	17925	10090	6.72e+07	22153240	23578520	21728320	14465000	24517160	22865880	2.02368e+07	0.885023	21288448	1.07265
	DAS43	B	6	NM_015742.1-4533s1c1	TRCN0000025897	Myo9b	17925	10090	1.3728e+08	9216880	14898440	3029080	2323280	6889160	12057660	4.08051e+06	0.338416	7271368	0.366377
	DAS43	D	2	NM_015742.2-4548s21c1	TRCN0000362422	Myo9b	17925	10090	1.3728e+08	22639720	24105120	20583480	16630640	21716680	23372420	19643600	0.840461	21135128	1.06492
	DAS43	E	7	NM_015742.2-1235s21c1	TRCN0000362502	Myo9b	17925	10090	1.3728e+08	10512200	8908560	930040	872480	1652520	9710380	1151680	0.118603	4575160	0.230525
	DAS43	G	6	NM_015742.2-2297s21c1	TRCN0000362501	Myo9b	17925	10090	1.3728e+08	21259720	28385480	8255360	967640	12890160	24822600	7.37105e+06	0.296949	14351672	0.723127
	DAS44	A	10	NM_010875.2-597s1c1	TRCN0000113650	Ncam1	17967	10090	1.2864e+08	23230600	22864720	15635080	14029120	11622680	23047660	1.37623e+07	0.597123	17476440	0.855097
	DAS44	E	8	NM_010875.3-2952s21c1	TRCN0000348577	Ncam1	17967	10090	1.3728e+08	27516720	27106280	20894520	21355240	15086280	27311500	1.9112e+07	0.699779	22391808	1.0956
	DAS44	E	12	NM_010875.3-1679s21c1	TRCN0000335737	Ncam1	17967	10090	1.2384e+08	12657040	15902640	15716120	11397880	9331960	14279840	1.21487e+07	0.850756	13001128	0.636126
	DAS44	F	11	NM_010875.3-436s21c1	TRCN0000335736	Ncam1	17967	10090	1.3728e+08	23097400	24101400	14318480	15184880	13268400	23599400	1.42573e+07	0.604136	17994112	0.880426
	DAS44	G	9	NM_010875.3-1924s21c1	TRCN0000335658	Ncam1	17967	10090	1.3728e+08	21093080	26590120	4536320	5417280	2887440	23841600	4.28035e+06	0.179533	12104848	0.592273
	DAS36	B	3	NM_009750.2-716s21c1	TRCN0000306389	Ngfrap1	12070	10090	1.0368e+08	10190400	13142800	10813080	11239200	13883000	11666600	1.19784e+07	1.02673	11853696	0.688896
	DAS36	B	5	NM_009750.1-465s1c1	TRCN0000124635	Ngfrap1	12070	10090	6.528e+07	13420880	19453360	15408760	16360960	13905320	16437120	1.5225e+07	0.926258	15709856	0.913002
	DAS36	C	6	NM_009750.2-617s21c1	TRCN0000306449	Ngfrap1	12070	10090	61440000	14420880	12148800	14763000	6543680	18191080	13284840	13165920	0.991048	13213488	0.767922
	DAS36	E	1	NM_009750.2-509s21c1	TRCN0000306450	Ngfrap1	12070	10090	1.3728e+08	6878200	5123120	13009480	2185920	13898080	6000660	9.69783e+06	1.61613	8218960	0.477657
	DAS36	F	4	NM_009750.2-589s21c1	TRCN0000332418	Ngfrap1	12070	10090	1.2864e+08	12302760	15842760	16482840	11821440	18788480	14072760	1.56976e+07	1.11546	15047656	0.874518
	DAS37	A	4	NM_008708.1-1621s21c1	TRCN0000249206	Nmt2	18108	10090	1.3728e+08	22358400	24150360	21253880	24323880	24029680	23254380	23202480	0.997768	23223240	1.39091
	DAS37	A	7	NM_008708.1-540s21c1	TRCN0000249205	Nmt2	18108	10090	1.3728e+08	16297280	18216840	14044720	17013440	12592960	17257060	1.45504e+07	0.843155	15633048	0.936307
	DAS37	C	4	NM_008708.1-1364s21c1	TRCN0000249203	Nmt2	18108	10090	1.3728e+08	16853120	19838480	3285440	8100280	14185080	18345800	8523600	0.464608	12452480	0.745814
	DAS37	D	8	NM_008708.1-1511s21c1	TRCN0000257854	Nmt2	18108	10090	1.3728e+08	13999800	22361240	4818200	21916320	17732680	18180520	14822400	0.81529	16165648	0.968206
	DAS37	G	1	NM_008708.1-795s21c1	TRCN0000249204	Nmt2	18108	10090	1.3728e+08	20687000	20973320	16205280	22992320	23308920	20830160	2.08355e+07	1.00026	20833368	1.24777
	DAS38	E	12	NM_010151.1-848s1c1	TRCN0000026161	Nr2f1	13865	10090	1.2864e+08	3428320	6101720	1561640	528040	362440	4765020	817373	0.171536	2396432	0.121291
	DAS38	F	2	NM_010151.1-1530s1c1	TRCN0000026160	Nr2f1	13865	10090	1.3728e+08	22361480	24288600	24546440	18319600	19964560	23325040	2.09435e+07	0.897899	21896136	1.10823
	DAS38	G	8	NM_010151.1-1263s1c1	TRCN0000026234	Nr2f1	13865	10090	1.3728e+08	29246080	28576360	27602360	22262960	21300160	28911220	2.37218e+07	0.820506	25797584	1.30569
	DAS38	G	9	NM_010151.1-1192s1c1	TRCN0000026198	Nr2f1	13865	10090	1.3728e+08	16532600	23194680	19708960	8413680	10782120	19863640	1.29683e+07	0.652864	15726408	0.79596
	DAS38	H	3	NM_010151.1-1458s1c1	TRCN0000026165	Nr2f1	13865	10090	1.3728e+08	19946720	21689400	23182680	18271560	19484400	20818060	20312880	0.975734	20514952	1.03832
	DAS37	A	5	NM_008776.1-589s1c1	TRCN0000054525	Pafah1b3	18476	10090	1.152e+08	22727160	23005920	17426240	24902440	21541120	22866540	2.12899e+07	0.931052	21920576	1.31289
	DAS37	B	12	NM_008776.1-667s1c1	TRCN0000054523	Pafah1b3	18476	10090	11520000	24133040	25009400	19909080	18358360	18624000	24571220	1.89638e+07	0.77179	21206776	1.27013
	DAS37	C	6	NM_008776.1-694s1c1	TRCN0000054527	Pafah1b3	18476	10090	1.3728e+08	11107640	11492000	3436800	12030640	9105440	11299820	8190960	0.724875	9434504	0.565059
	DAS37	E	12	NM_008776.1-488s1c1	TRCN0000054524	Pafah1b3	18476	10090	1.3728e+08	13960880	14448000	1257760	4130360	2884560	14204440	2757560	0.194134	7336312	0.439392
	DAS37	F	5	NM_008776.1-217s1c2	TRCN0000174219	Pafah1b3	18476	10090	1.2672e+08	10644280	12733240	3087360	10461760	5780440	11688760	6.44319e+06	0.551229	8541416	0.51157
	DAS45	A	12	NM_023209.2-1128s21c1	TRCN0000322233	Pbk	52033	10090	9.024e+07	11066840	3803320	3557120	7933000	5805320	7435080	5.76515e+06	0.775398	6433120	0.327357
	DAS45	C	3	NM_023209.1-946s1c1	TRCN0000026700	Pbk	52033	10090	1.1808e+08	20949560	17362680	11754000	20126480	9847840	19156120	13909440	0.726109	16008112	0.814592
	DAS45	D	5	NM_023209.1-483s1c1	TRCN0000026712	Pbk	52033	10090	122880000	20274000	23689800	22240720	25239560	16995160	21981900	2.14918e+07	0.977705	21687848	1.10361
	DAS45	F	10	NM_023209.2-1291s21c1	TRCN0000322169	Pbk	52033	10090	1.3728e+08	15820400	13098680	9657240	16382880	9685560	14459540	11908560	0.823578	12928952	0.657905
	DAS45	G	11	NM_023209.1-374s1c1	TRCN0000026752	Pbk	52033	10090	1.3728e+08	17079840	15379560	6197840	17897560	9823120	16229700	1.13062e+07	0.696635	13275584	0.675544
	DAS38	A	4	NM_019417.1-927s1c1	TRCN0000075391	Pdlim4	30794	10090	1.3728e+08	19992960	19889440	17036960	12539800	10981600	19941200	1.35195e+07	0.677966	16088152	0.814269
	DAS38	A	10	NM_019417.1-318s1c1	TRCN0000075390	Pdlim4	30794	10090	1.3728e+08	19189720	20646720	14875440	12543800	7849360	19918220	11756200	0.590223	15021008	0.760258
	DAS38	B	11	NM_019417.1-841s1c1	TRCN0000075392	Pdlim4	30794	10090	1.3728e+08	14816160	19074440	15167880	9904480	7050200	16945300	10707520	0.631887	13202632	0.668224
	DAS38	D	1	NM_019417.1-171s1c1	TRCN0000075389	Pdlim4	30794	10090	1.3728e+08	17127960	20204600	15064920	8791600	6579000	18666280	1.01452e+07	0.543503	13553616	0.685989
	DAS38	G	1	NM_019417.1-928s1c1	TRCN0000075388	Pdlim4	30794	10090	1.3728e+08	19766320	23055360	20744920	13717240	12134520	21410840	1.55322e+07	0.725438	17883672	0.905146
	DAS36	A	3	NM_019809.2-610s21c1	TRCN0000302496	Pdlim5	56376	10090	1.2192e+08	7750440	16239280	10033480	11868560	10967920	11994860	1.09567e+07	0.913446	11371936	0.660897
	DAS36	B	6	NM_019809.2-434s21c1	TRCN0000304703	Pdlim5	56376	10090	7.488e+07	11247200	17057400	17175280	15168120	16715720	14152300	16353040	1.1555	15472744	0.899222
	DAS36	F	9	NM_019809.2-904s21c1	TRCN0000304756	Pdlim5	56376	10090	1.1424e+08	15382760	22220680	22577200	16198840	19980640	18801720	19585560	1.04169	19272024	1.12002
	DAS36	F	10	NM_019809.2-370s21c1	TRCN0000304758	Pdlim5	56376	10090	1.3728e+08	12964680	18197000	17266600	12382560	16353400	15580840	1.53342e+07	0.984169	15432848	0.896904
	DAS36	H	1	NM_019809.2-1109s21c1	TRCN0000304702	Pdlim5	56376	10090	1.3728e+08	12533760	7030520	14653000	6693200	15110040	9782140	12152080	1.24227	11204104	0.651144
	DAS38	B	5	NM_199317.1-1753s1c1	TRCN0000104050	Phf16	382207	10090	1.3728e+08	23140280	27188320	25890720	24043480	24181320	25164300	2.47052e+07	0.981755	24888824	1.2597
	DAS38	C	3	NM_199317.1-2275s1c1	TRCN0000104052	Phf16	382207	10090	1.3728e+08	23670360	24635120	20514480	18709040	18182160	24152740	1.91352e+07	0.792259	21142232	1.07007
	DAS38	E	1	NM_199317.1-1579s1c1	TRCN0000104053	Phf16	382207	10090	1.3728e+08	4811160	10691800	8370200	2270200	2219720	7751480	4.28671e+06	0.553018	5672616	0.287108
	DAS38	E	9	NM_199317.1-482s1c1	TRCN0000104051	Phf16	382207	10090	1.3728e+08	12031720	17406560	18490800	10090160	5084360	14719140	1.12218e+07	0.762393	12620720	0.638772
	DAS38	H	8	NM_199317.1-163s1c1	TRCN0000104054	Phf16	382207	10090	69120000	19131920	21773920	20055400	10758040	15161680	20452920	15325040	0.749284	17376192	0.879461
	DAS44	C	5	NM_016966.2-579s1c1	TRCN0000041624	Phgdh	236539	10090	1.1232e+08	13799960	17523480	10813440	10547880	9364920	15661720	10242080	0.653956	12409936	0.6072
	DAS44	E	5	NM_016966.2-259s1c1	TRCN0000041626	Phgdh	236539	10090	6.048e+07	27898520	21959320	20049880	16316600	12957840	24928920	16441440	0.659533	19836432	0.970568
	DAS44	E	10	NM_016966.3-909s21c1	TRCN0000316644	Phgdh	236539	10090	1.3728e+08	22891560	23624920	20450280	20234040	13388040	23258240	18024120	0.774956	20117768	0.984333
	DAS44	H	2	NM_016966.2-1254s1c1	TRCN0000041627	Phgdh	236539	10090	7.776e+07	24358360	23687240	15727600	14142000	15655600	24022800	1.51751e+07	0.631694	18714160	0.915657
	DAS44	H	5	NM_016966.3-1703s21c1	TRCN0000316636	Phgdh	236539	10090	1.1616e+08	24694200	26477600	18862480	18287280	13011640	25585900	1.67205e+07	0.653503	20266640	0.991617
	DAS37	B	9	NM_009344.1-662s1c1	TRCN0000054486	Phlda1	21664	10090	1.3728e+08	20621280	20889080	14894760	25539280	21512040	20755180	2.06487e+07	0.994869	20691288	1.23926
	DAS37	C	1	NM_009344.1-920s1c1	TRCN0000054483	Phlda1	21664	10090	8.352e+07	21772560	21479600	13512400	22371680	22051360	21626080	1.93118e+07	0.892987	20237520	1.21208
	DAS37	F	3	NM_009344.3-1444s21c1	TRCN0000295139	Phlda1	21664	10090	1.3728e+08	17380600	21260000	9366680	20849400	18492680	19320300	1.62363e+07	0.840373	17469872	1.04632
	DAS37	F	12	NM_009344.1-873s1c1	TRCN0000054485	Phlda1	21664	10090	1.3728e+08	21230840	18741000	8652560	24173200	17327680	19985920	1.67178e+07	0.83648	18025056	1.07957
	DAS37	G	11	NM_009344.3-832s21c1	TRCN0000295138	Phlda1	21664	10090	1.3728e+08	21130200	20706360	10632960	18426920	16260600	20918280	1.51068e+07	0.722183	17431408	1.04402
	DAS44	A	5	NM_011495.1-906s1c1	TRCN0000025678	Plk4	20873	10090	4.992e+07	23974600	18726080	10015240	12538440	10471960	21350340	1.10085e+07	0.515615	15145264	0.741036
	DAS44	A	12	NM_011495.2-2255s21c1	TRCN0000322097	Plk4	20873	10090	1.3536e+08	14709680	17172280	17957280	12709000	10588720	15940980	1.37517e+07	0.862661	14627392	0.715697
	DAS44	B	4	NM_011495.2-352s21c1	TRCN0000322099	Plk4	20873	10090	1.3536e+08	6506280	15267600	3434080	3762560	2569000	10886940	3.25521e+06	0.299002	6307904	0.308637
	DAS44	F	7	NM_011495.2-3084s21c1	TRCN0000322034	Plk4	20873	10090	1.3728e+08	16641680	18285520	13083560	12654600	12031680	17463600	1.25899e+07	0.720925	14539408	0.711392
	DAS44	H	8	NM_011495.1-2084s1c1	TRCN0000025677	Plk4	20873	10090	4.992e+07	19110400	24921920	13237240	6108320	6356200	22016160	8.56725e+06	0.389135	13946816	0.682398
	DAS42	A	7	NM_133692.2-142s21c1	TRCN0000279479	Pold3	67967	10090	1.056e+08	16322400	1413240	2586560	7105520	2314680	8867820	4.00225e+06	0.451323	5948480	0.279842
	DAS42	C	8	NM_133692.2-530s21c1	TRCN0000279476	Pold3	67967	10090	1.3728e+08	19339960	16888360	14902080	21265640	15698440	18114160	17288720	0.954431	17618896	0.84616
	DAS42	E	4	NM_133692.2-383s21c1	TRCN0000279480	Pold3	67967	10090	1.3728e+08	16846440	18055520	1690360	8533120	2937200	17450980	4.38689e+06	0.251384	9612528	0.510214
	DAS42	E	12	NM_133692.1-1212s1c1	TRCN0000174991	Pold3	67967	10090	7.488e+07	12399000	3613480	2672520	3341560	1247640	8006240	2.42057e+06	0.302336	4654840	0.231578
	DAS42	F	7	NM_133692.2-426s21c1	TRCN0000279477	Pold3	67967	10090	1.3728e+08	27014640	27668960	22291200	28174600	23819080	27341800	2.47616e+07	0.905633	25793696	1.2803
	DAS42	B	10	NM_145150.2-171s21c1	TRCN0000340487	Prc1	233406	10090	17280000	25410400	21074040	15073760	20514360	10347640	23242220	15311920	0.658798	18484040	0.840586
	DAS42	E	2	NM_145150.1-1068s1c1	TRCN0000219540	Prc1	233406	10090	4.128e+07	26071520	24791400	10793760	18786440	13166560	25431460	14248920	0.560287	18721936	0.965915
	DAS42	E	6	NM_145150.2-2142s21c1	TRCN0000352509	Prc1	233406	10090	8.352e+07	12833640	8984640	4025880	6386320	2709880	10909140	4.37403e+06	0.400951	6988072	0.340816
	DAS42	E	9	NM_145150.2-1835s21c1	TRCN0000340564	Prc1	233406	10090	1.3728e+08	5568560	8617160	389320	756440	563880	7092860	569880	0.0803456	3179072	0.19161
	DAS42	H	1	NM_145150.2-2793s21c1	TRCN0000340488	Prc1	233406	10090	1.3536e+08	20692040	16979440	6195440	15661080	11400560	18835740	1.10857e+07	0.588546	14185712	0.756663
	DAS39	A	1	NM_008922.1-790s1c1	TRCN0000111466	Prim2	19076	10090	7.488e+07	13222760	13397920	5002720	4558640	3640640	13310340	4.40067e+06	0.33062	7964536	0.469537
	DAS39	B	10	NM_008922.1-1128s1c1	TRCN0000111467	Prim2	19076	10090	1.1328e+08	18155040	21471480	14491280	14617760	9477840	19813260	1.28623e+07	0.649176	15642680	0.922191
	DAS39	D	9	NM_008922.1-1153s1c1	TRCN0000111469	Prim2	19076	10090	7.392e+07	11619240	10098840	2680720	1837800	1616520	10859040	2.04501e+06	0.188324	5570624	0.328408
	DAS39	G	12	NM_008922.1-1711s1c1	TRCN0000111465	Prim2	19076	10090	122880000	19875440	20871320	22408520	22337520	18025280	20373380	2.09238e+07	1.02702	20703616	1.22055
	DAS39	H	4	NM_008922.1-1233s21c1	TRCN0000326544	Prim2	19076	10090	9.12e+07	10769520	12945280	1938920	1849880	1329040	11857400	1.70595e+06	0.143872	5766528	0.339957
	DAS44	B	12	NM_008926.2-1274s1c1	TRCN0000022716	Prkg2	19092	10090	7.392e+07	24585480	25222080	21756960	22703960	15297520	24903780	19919480	0.799858	21913200	1.07218
	DAS44	C	2	NM_008926.4-1297s21c1	TRCN0000361375	Prkg2	19092	10090	1.3728e+08	26557960	28808440	23768640	26905280	17639360	27683200	2.27711e+07	0.82256	24735936	1.21029
	DAS44	D	4	NM_008926.4-1261s21c1	TRCN0000361374	Prkg2	19092	10090	1.0848e+08	3953560	10078360	2243640	1597360	1793240	7015960	1878080	0.267687	3933232	0.192447
	DAS44	E	4	NM_008926.4-2267s21c1	TRCN0000361437	Prkg2	19092	10090	1.3728e+08	19977880	13540880	1269320	1163880	1602440	16759380	1.34521e+06	0.0802663	7510880	0.367497
	DAS44	H	6	NM_008926.2-1710s1c1	TRCN0000022717	Prkg2	19092	10090	2.592e+07	28170800	28876480	21253000	22978920	19072520	28523640	21101480	0.739789	24070344	1.17773
	DAS43	A	12	NM_177420.1-1695s21c1	TRCN0000363952	Psat1	107272	10090	1.2192e+08	21185720	21927880	17680640	21030920	20825720	21556800	19845760	0.920626	20530176	1.03444
	DAS43	B	3	NM_177420.1-156s1c1	TRCN0000120421	Psat1	107272	10090	1.3536e+08	23929400	25196640	19301120	16722360	25678280	24563020	2.05673e+07	0.837326	22165560	1.11684
	DAS43	C	1	NM_177420.1-474s1c1	TRCN0000120419	Psat1	107272	10090	7.104e+07	18021400	20439480	11164280	5403680	17265240	19230440	1.12777e+07	0.586452	14458816	0.728526
	DAS43	H	6	NM_177420.1-775s1c1	TRCN0000120420	Psat1	107272	10090	8.544e+07	19359680	20430680	2878560	2185200	5140840	19895180	3.40153e+06	0.170973	9998992	0.503812
	DAS37	A	2	NM_008957.2-2395s21c1	TRCN0000326120	Ptch1	19206	10090	1.3728e+08	11734280	13218280	3969000	5517320	4467120	12476280	4.65115e+06	0.372799	7781200	0.466038
	DAS37	A	6	NM_008957.2-543s21c1	TRCN0000326122	Ptch1	19206	10090	1.248e+08	9468960	14919680	8242760	12475760	6159560	12194320	8959360	0.734716	10253344	0.614102
	DAS37	B	1	NM_008957.2-1735s21c1	TRCN0000326195	Ptch1	19206	10090	1.3152e+08	9929640	10352640	6342640	10905960	8323400	10141140	8524000	0.840537	9170856	0.549268
	DAS37	F	1	NM_008957.1-1421s1c1	TRCN0000042538	Ptch1	19206	10090	1.3728e+08	15453400	14104360	2952880	7081240	4956200	14778880	4.99677e+06	0.338102	8909616	0.533622
	DAS37	H	6	NM_008957.1-3472s1c1	TRCN0000042539	Ptch1	19206	10090	5.952e+07	26105800	26548000	22052040	25630560	25625280	26326900	24435960	0.928175	25192336	1.50884
	DAS40	A	3	NM_008958.1-2017s1c1	TRCN0000088373	Ptch2	19207	10090	4.992e+07	12683360	21338880	16008440	18412880	13821440	17011120	16080920	0.945318	16453000	0.930238
	DAS40	A	4	NM_008958.1-226s1c1	TRCN0000088376	Ptch2	19207	10090	5.568e+07	13272080	18537640	5785480	8370640	5307800	15904860	6.48797e+06	0.407924	10254728	0.579793
	DAS40	A	12	NM_008958.1-523s1c1	TRCN0000088377	Ptch2	19207	10090	1.2192e+08	6390400	7254080	375600	1080960	1572960	6822240	1009840	0.148022	3334800	0.188547
	DAS40	E	3	NM_008958.1-3006s1c1	TRCN0000088375	Ptch2	19207	10090	1.0848e+08	19196880	20684320	20218560	21655520	16257760	19940600	19377280	0.97175	19602608	1.10831
	DAS40	E	10	NM_008958.1-109s1c1	TRCN0000088374	Ptch2	19207	10090	1.3728e+08	17742360	12356680	6414120	7587840	4231800	15049520	6077920	0.403861	9666560	0.546538
	DAS37	B	10	NM_022415.3-335s21c1	TRCN0000366739	Ptges	64292	10090	1.3728e+08	12775080	11380680	4807040	14126240	9492280	12077880	9.47519e+06	0.784507	10516264	0.629849
	DAS37	D	9	NM_022415.3-299s21c1	TRCN0000366670	Ptges	64292	10090	1.3728e+08	12291800	12706720	5053760	14738880	8933720	12499260	9.57545e+06	0.766082	10744976	0.643547
	DAS37	F	2	NM_022415.3-855s21c1	TRCN0000366738	Ptges	64292	10090	1.3728e+08	13334160	14270120	10494160	15532880	12808360	13802140	1.29451e+07	0.937908	13287936	0.795852
	DAS37	F	6	NM_022415.3-892s21c1	TRCN0000375552	Ptges	64292	10090	1.3728e+08	16808120	18364640	11394920	19315120	19072880	17586380	1.65943e+07	0.943589	16991136	1.01765
	DAS37	G	6	NM_022415.3-370s21c1	TRCN0000366736	Ptges	64292	10090	1.3728e+08	20232120	24276560	13473480	17661920	13436400	22254340	1.48573e+07	0.667612	17816096	1.06706
	DAS45	C	9	NM_008969.1-196s1c1	TRCN0000067902	Ptgs1	19224	10090	1.3728e+08	9519480	15215240	2776560	10947360	4986640	12367360	6.23685e+06	0.504299	8689056	0.442153
	DAS45	H	1	NM_008969.3-1051s21c1	TRCN0000334293	Ptgs1	19224	10090	9.408e+07	21168440	23804800	17786240	24574480	12863440	22486620	1.84081e+07	0.818623	20039480	1.01973
	DAS45	H	2	NM_008969.3-1190s21c1	TRCN0000334227	Ptgs1	19224	10090	1.3728e+08	8345280	6675920	1982520	7540880	1710320	7510600	3.74457e+06	0.498572	5250984	0.267203
	DAS45	H	4	NM_008969.3-2205s21c1	TRCN0000348237	Ptgs1	19224	10090	1.3728e+08	25125120	27676000	24060200	31056040	22339800	26400560	25818680	0.97796	26051432	1.32566
	DAS45	H	6	NM_008969.1-475s1c1	TRCN0000067899	Ptgs1	19224	10090	1.3728e+08	20721840	16818840	12697880	25894480	9560320	18770340	1.60509e+07	0.85512	17138672	0.872122
	DAS41	B	3	NM_172498.3-1740s21c1	TRCN0000361378	Ptk2b	19229	10090	1.3728e+08	23012200	21177440	15950760	16526240	15395920	22094820	15957640	0.722234	18412512	0.857745
	DAS41	B	10	NM_172498.1-2242s1c1	TRCN0000023631	Ptk2b	19229	10090	6.24e+07	28400760	27091560	25508560	24489760	23440480	27746160	24479600	0.88227	25786224	1.20718
	DAS41	C	11	NM_172498.3-1708s21c1	TRCN0000361440	Ptk2b	19229	10090	1.3728e+08	21947760	18596320	16948800	15389120	13878080	20272040	1.54053e+07	0.75993	17352016	0.800708
	DAS41	E	4	NM_172498.3-2562s21c1	TRCN0000361379	Ptk2b	19229	10090	1.3728e+08	13855920	14303040	7992000	6794600	5424160	14079480	6736920	0.478492	9673944	0.457299
	DAS41	G	6	NM_172498.3-1927s21c1	TRCN0000361441	Ptk2b	19229	10090	1.3728e+08	18232280	18544640	14797400	9416000	8113160	18388460	10775520	0.585994	13820696	0.651785
	DAS43	A	9	NM_008981.1-2712s1c1	TRCN0000029951	Ptprg	19270	10090	1.3728e+08	22524560	23148240	17405560	15835240	24172520	22836400	1.91378e+07	0.838038	20617224	1.03882
	DAS43	C	2	NM_008981.1-3200s1c1	TRCN0000029950	Ptprg	19270	10090	1.3728e+08	24107800	26435720	26065640	17777920	26723920	25271760	2.35225e+07	0.930782	24222200	1.22047
	DAS43	C	10	NM_008981.1-4084s1c1	TRCN0000029953	Ptprg	19270	10090	1.3728e+08	20889800	24827320	10505440	7648280	11296960	22858560	9.81689e+06	0.429462	15033560	0.757485
	DAS43	D	12	NM_008981.1-1155s1c1	TRCN0000029952	Ptprg	19270	10090	1.2672e+08	19967600	20571640	8354480	5298400	10343200	20269620	7.99869e+06	0.394615	12907064	0.650339
	DAS43	H	1	NM_008981.3-4279s21c1	TRCN0000314415	Ptprg	19270	10090	1.3344e+08	21235600	21739280	15980360	7278920	16110600	21487440	1.31233e+07	0.610743	16468952	0.829809
	DAS41	C	6	NM_009015.2-806s1c1	TRCN0000012214	Rad54l	19366	10090	122880000	10761920	5823800	2696760	2286920	1872560	8292860	2.28541e+06	0.275588	4688392	0.197371
	DAS41	D	9	NM_009015.3-1673s21c1	TRCN0000281997	Rad54l	19366	10090	1.3728e+08	10741440	13697160	2936320	3738960	1452960	12219300	2.70941e+06	0.221732	6513368	0.320386
	DAS41	D	11	NM_009015.3-2069s21c1	TRCN0000273789	Rad54l	19366	10090	1.3728e+08	23957280	23131200	22601400	22878080	21001360	23544240	22160280	0.941219	22713864	1.06489
	DAS41	E	6	NM_009015.3-2171s21c1	TRCN0000273787	Rad54l	19366	10090	1.3728e+08	8406640	13897080	8327480	6384800	2644560	11151860	5.78561e+06	0.518803	7932112	0.39907
	DAS41	G	2	NM_009015.3-2876s21c1	TRCN0000273738	Rad54l	19366	10090	1.3728e+08	22093880	20330440	18739960	17395120	17580920	21212160	1.79053e+07	0.844107	19228064	0.896455
	DAS39	A	8	NM_030690.2-759s21c1	TRCN0000255951	Rai14	75646	10090	1.0272e+08	12612960	15741120	8229240	9808160	4082960	14177040	7.37345e+06	0.520098	10094888	0.595129
	DAS39	C	3	NM_030690.2-2068s21c1	TRCN0000255954	Rai14	75646	10090	1.3728e+08	19196720	21502920	19388160	20875160	19428960	20349820	1.98974e+07	0.977769	20078384	1.18369
	DAS39	E	4	NM_030690.2-834s21c1	TRCN0000255955	Rai14	75646	10090	1.3728e+08	17139000	20721400	19458960	16892080	16589040	18930200	1.76467e+07	0.932198	18160096	1.0706
	DAS39	F	6	NM_030690.2-4645s21c1	TRCN0000255953	Rai14	75646	10090	1.152e+08	19969280	20263400	21250640	16617520	15021840	20116340	17630000	0.876402	18624536	1.09798
	DAS39	G	10	NM_030690.2-1989s21c1	TRCN0000255952	Rai14	75646	10090	1.3728e+08	18001920	20787560	19519320	15163320	14256960	19394740	16313200	0.841115	17545816	1.03439
	DAS44	A	2	NM_053268.1-386s1c1	TRCN0000034350	Rasa2	114713	10090	8.448e+07	21421120	21577240	16226000	12838040	12693880	21499180	1.39193e+07	0.647434	16951256	0.8294
	DAS44	B	1	NM_053268.2-1174s21c1	TRCN0000304370	Rasa2	114713	10090	1.0272e+08	15968160	24154840	10794160	5803320	3859760	20061500	6819080	0.339909	12116048	0.592821
	DAS44	C	3	NM_053268.1-1304s1c1	TRCN0000034351	Rasa2	114713	10090	7.296e+07	23384040	25772040	18357680	17620640	12035440	24578040	1.60046e+07	0.651174	19433968	0.950876
	DAS44	D	10	NM_053268.2-2969s21c1	TRCN0000310898	Rasa2	114713	10090	1.1424e+08	4673440	7653560	1524920	1461720	1089880	6163500	1358840	0.220466	3280704	0.16052
	DAS44	G	12	NM_053268.1-177s1c1	TRCN0000034349	Rasa2	114713	10090	1.0176e+08	17143760	16853280	13181560	9314120	10473000	16998520	10989560	0.646501	13393144	0.655307
	DAS44	D	8	XM_358326.1-488s1c1	TRCN0000088050	Rbbp8	225182	10090	122880000	15199040	17707800	16152640	10286360	8452920	16453420	11630640	0.706883	13559752	0.663459
	DAS44	E	1	NM_001081223.1-555s21c1	TRCN0000305376	Rbbp8	225182	10090	1.3728e+08	15979040	15391320	6287440	7004360	5551000	15685180	6.28093e+06	0.400437	10042632	0.491371
	DAS44	F	5	NM_001081223.1-2253s21c1	TRCN0000305310	Rbbp8	225182	10090	1.3728e+08	15712480	14228240	6677200	4212000	6103240	14970360	5.66415e+06	0.378357	9386632	0.459274
	DAS44	G	5	XM_358326.1-429s1c1	TRCN0000088051	Rbbp8	225182	10090	1.2384e+08	21847520	22700040	13491560	8957120	13441800	22273780	1.19635e+07	0.537111	16087608	0.787143
	DAS44	H	3	NM_001081223.1-1772s21c1	TRCN0000305311	Rbbp8	225182	10090	9.312e+07	11998280	18668920	8092640	1497000	807640	15333600	3465760	0.226024	8212896	0.401845
	DAS40	A	7	NM_011254.3-2191s1c1	TRCN0000105546	Rbp1	19659	10090	8.928e+07	14292760	20142760	6827240	14287760	10868840	17217760	10661280	0.619202	13283872	0.751058
	DAS40	B	3	NM_011254.3-2055s1c1	TRCN0000105547	Rbp1	19659	10090	9.408e+07	19955640	21276040	18568000	17184480	17380120	20615840	1.77109e+07	0.85909	18872856	1.06705
	DAS40	G	3	NM_011254.3-2389s1c1	TRCN0000105549	Rbp1	19659	10090	1.3728e+08	15523840	8445760	8998960	8320480	7014520	11984800	8111320	0.676801	9660712	0.546208
	DAS40	G	7	NM_011254.3-2441s1c1	TRCN0000105545	Rbp1	19659	10090	1.3728e+08	13901800	15546440	6756360	7112960	4309440	14724120	6.05959e+06	0.411542	9525400	0.538557
	DAS40	G	12	NM_011254.3-2231s1c1	TRCN0000105548	Rbp1	19659	10090	9.504e+07	12991040	15970320	9780200	10696360	12479280	14480680	10985280	0.758616	12383440	0.700148
	DAS41	A	3	NM_021557.2-794s1c1	TRCN0000041778	Rdh11	17252	10090	1.0176e+08	13677440	16033760	13719840	7032400	8665800	14855600	9.80601e+06	0.660089	11825848	0.567538
	DAS41	C	9	NM_021557.5-903s21c1	TRCN0000294909	Rdh11	17252	10090	1.3344e+08	9666800	15467840	3114680	1896440	2233440	12567320	2.41485e+06	0.192153	6475840	0.332009
	DAS41	D	2	NM_021557.2-1222s1c1	TRCN0000041782	Rdh11	17252	10090	1.3728e+08	22355120	22637240	16325160	20052080	16842920	22496180	1.77401e+07	0.788581	19642504	0.925581
	DAS41	F	1	NM_021557.5-382s21c1	TRCN0000294911	Rdh11	17252	10090	1.3728e+08	17590160	17935760	10418640	8758560	5988840	17762960	8388680	0.472257	12138392	0.572783
	DAS41	H	2	NM_021557.2-998s1c1	TRCN0000041780	Rdh11	17252	10090	5.568e+07	21070760	22926200	21770920	20176520	21245040	21998480	21064160	0.957528	21437888	1.01746
	DAS39	A	3	NM_026446.3-860s21c1	TRCN0000377063	Rgs19	56470	10090	1.2384e+08	19556240	20912960	19370320	22822480	14827640	20234600	1.90068e+07	0.939322	19497928	1.14947
	DAS39	E	11	NM_026446.3-296s21c1	TRCN0000377128	Rgs19	56470	10090	1.3728e+08	9719360	11944920	6197760	2805760	1549520	10832140	3517680	0.324745	6443464	0.379865
	DAS39	E	12	NM_026446.3-484s21c1	TRCN0000376795	Rgs19	56470	10090	1.3728e+08	17337040	21096120	18875440	19037800	16669240	19216580	18194160	0.946795	18603128	1.09672
	DAS39	G	5	NM_026446.3-694s21c1	TRCN0000377127	Rgs19	56470	10090	1.3728e+08	20058960	21206800	23711680	23144440	20693000	20632880	2.25164e+07	1.09129	21762976	1.283
	DAS39	H	7	NM_026446.3-994s21c1	TRCN0000366650	Rgs19	56470	10090	1.3728e+08	19820400	22133560	16801720	17803040	14462960	20976980	1.63559e+07	0.779707	18204336	1.07321
	DAS43	A	6	NM_009821.1-2497s1c1	TRCN0000084810	Runx1	12394	10090	1.0848e+08	22217560	19982880	10160920	8912160	14717320	21100220	1.12635e+07	0.533808	15198168	0.765779
	DAS43	F	2	NM_009821.2-6025s21c1	TRCN0000218119	Runx1	12394	10090	1.3728e+08	17767560	19588280	8294200	6955720	9336560	18677920	8.19549e+06	0.43878	12388464	0.624208
	DAS43	F	6	NM_009821.1-2053s1c1	TRCN0000084812	Runx1	12394	10090	1.2672e+08	22283840	26333600	6776920	6054200	18059640	24308720	10296920	0.42359	15901640	0.801224
	DAS43	G	7	NM_009821.1-1914s1c1	TRCN0000084809	Runx1	12394	10090	1.3728e+08	19645960	21502360	1510240	918600	2388760	20574160	1.60587e+06	0.0780526	9193184	0.46321
	DAS43	G	9	NM_009821.1-2027s1c1	TRCN0000084811	Runx1	12394	10090	7.872e+07	20241000	20786240	2774480	2562440	8141360	20513620	4492760	0.219014	10901104	0.549266
	DAS44	A	1	NM_025436.2-497s21c1	TRCN0000354091	Sc4mol	66234	10090	1.3728e+08	19614520	18218160	11871600	12322200	11877280	18916340	1.20237e+07	0.635625	14780752	0.723201
	DAS44	B	11	NM_025436.2-437s21c1	TRCN0000306154	Sc4mol	66234	10090	1.3728e+08	20440800	19444200	15352840	14683720	10136080	19942500	13390880	0.671474	16011528	0.783421
	DAS44	E	7	NM_025436.1-276s1c1	TRCN0000076632	Sc4mol	66234	10090	8.832e+07	34822800	34144560	30980600	32246320	22628840	34483680	2.86186e+07	0.829917	30964624	1.51505
	DAS44	F	9	NM_025436.1-1284s1c1	TRCN0000076628	Sc4mol	66234	10090	53760000	12489960	17489920	4257880	5743160	5169240	14989940	5056760	0.337344	9030032	0.441826
	DAS44	G	2	NM_025436.2-306s21c1	TRCN0000306155	Sc4mol	66234	10090	107520000	25017240	23458240	4078040	6186600	3592760	24237740	4.61913e+06	0.190576	12466576	0.609972
	DAS43	A	3	NM_011519.1-792s1c1	TRCN0000072001	Sdc1	20969	10090	1.3728e+08	17572960	16294640	5756600	758480	12995320	16933800	6.50347e+06	0.384052	10675600	0.537904
	DAS43	A	8	NM_011519.2-1503s21c1	TRCN0000311084	Sdc1	20969	10090	1.2864e+08	23924640	24543480	21823760	18903440	24788160	24234060	2.18385e+07	0.901147	22796696	1.14864
	DAS43	E	12	NM_011519.2-304s21c1	TRCN0000302269	Sdc1	20969	10090	8.736e+07	9815720	13042960	2728080	1778000	3247320	11429340	2.58447e+06	0.226126	6122416	0.308486
	DAS43	G	8	NM_011519.1-1072s1c1	TRCN0000072002	Sdc1	20969	10090	9.216e+07	24841160	26567400	18308240	7342240	18173160	25704280	14607880	0.568305	19046440	0.959679
	DAS43	H	7	NM_011519.1-865s1c1	TRCN0000071999	Sdc1	20969	10090	6.72e+07	24341040	25835200	18018000	11289360	18447120	25088120	15918160	0.63449	19586144	0.986873
	DAS38	D	7	NM_008304.1-595s1c1	TRCN0000071566	Sdc2	15529	10090	1.3728e+08	19943440	15092480	20533440	14944080	10301560	17517960	1.52597e+07	0.871088	16163000	0.818057
	DAS38	E	6	NM_008304.2-1584s21c1	TRCN0000312853	Sdc2	15529	10090	1.3728e+08	19537120	23596360	23593720	17157920	16975760	21566740	1.92425e+07	0.892229	20172176	1.02097
	DAS38	F	1	NM_008304.2-919s21c1	TRCN0000349353	Sdc2	15529	10090	1.3728e+08	22515160	21225320	25862400	15915520	15089560	21870240	1.89558e+07	0.866741	20121592	1.01841
	DAS38	F	6	NM_008304.2-990s21c1	TRCN0000377150	Sdc2	15529	10090	1.3728e+08	26178360	26425600	25815600	22208880	21681440	26301980	2.32353e+07	0.883405	24461976	1.23809
	DAS38	H	1	NM_008304.1-641s1c1	TRCN0000071563	Sdc2	15529	10090	1.3728e+08	18437720	19211200	20712880	14232520	13200240	18824460	1.60485e+07	0.852537	17158912	0.868463
	DAS36	D	2	NM_080559.1-306s21c1	TRCN0000251023	Sh3bgrl3	73723	10090	9.216e+07	14518440	18481320	17732000	15929560	20416520	16499880	1.8026e+07	1.09249	17415568	1.01213
	DAS36	D	10	NM_080559.1-219s21c1	TRCN0000258126	Sh3bgrl3	73723	10090	9.888e+07	10995360	10667720	12709080	6771160	10410280	10831540	9.96351e+06	0.919861	10310720	0.599223
	DAS36	E	3	NM_080559.1-175s21c1	TRCN0000251024	Sh3bgrl3	73723	10090	1.2672e+08	7458920	11134480	6166840	6381240	9283600	9296700	7.27723e+06	0.782775	8085016	0.469873
	DAS36	E	11	NM_080559.1-283s21c1	TRCN0000251022	Sh3bgrl3	73723	10090	1.3728e+08	6676640	12193560	1035800	750760	2613880	9435100	1.46681e+06	0.155463	4654128	0.270482
	DAS36	H	3	NM_080559.1-424s21c1	TRCN0000251021	Sh3bgrl3	73723	10090	1.3728e+08	19577440	20244200	21938200	20675200	21396440	19910820	2.13366e+07	1.07161	20766296	1.20687
	DAS43	A	7	NM_011369.2-1112s21c1	TRCN0000248578	Shcbp1	20419	10090	1.1904e+08	24646560	24476840	11692240	3679320	12730000	24561700	9.36719e+06	0.381374	15444992	0.778215
	DAS43	B	2	NM_011369.2-852s21c1	TRCN0000248577	Shcbp1	20419	10090	1.3728e+08	19873280	23611000	19768760	15595440	21991400	21742140	1.91185e+07	0.879331	20167976	1.01619
	DAS43	D	9	NM_011369.2-722s21c1	TRCN0000248580	Shcbp1	20419	10090	1.2192e+08	20633920	23840920	6601880	3569520	3519800	22237420	4.56373e+06	0.205228	11633208	0.586154
	DAS43	D	10	NM_011369.2-2063s21c1	TRCN0000248579	Shcbp1	20419	10090	1.3728e+08	9745320	19688640	1858880	1569400	1680320	14716980	1.70287e+06	0.115708	6908512	0.348094
	DAS43	F	9	NM_011369.2-144s1c1	TRCN0000216295	Shcbp1	20419	10090	4.992e+07	18416920	22187240	3750120	1839320	3513520	20302080	3034320	0.149459	9941424	0.500911
	DAS38	B	1	NM_028818.1-932s1c1	TRCN0000106037	Sipa1l3	74206	10090	1.3728e+08	9019720	20527840	16966960	8910080	6819080	14773780	1.08987e+07	0.737706	12448736	0.630067
	DAS38	B	2	NM_028818.1-1122s1c1	TRCN0000106038	Sipa1l3	74206	10090	1.3728e+08	19773880	24559640	21779480	18649440	17611880	22166760	1.93469e+07	0.87279	20474864	1.03629
	DAS38	B	4	NM_028818.1-3363s1c1	TRCN0000106035	Sipa1l3	74206	10090	1.3728e+08	26735960	28179280	26031520	24779000	24451000	27457620	2.50872e+07	0.913669	26035352	1.31773
	DAS38	C	8	NM_028818.1-592s1c1	TRCN0000106036	Sipa1l3	74206	10090	1.3728e+08	27472040	30260840	26953400	23786440	22269800	28866440	2.43365e+07	0.843074	26148504	1.32345
	DAS38	G	11	NM_028818.1-1119s1c1	TRCN0000106039	Sipa1l3	74206	10090	1.3728e+08	15692160	21091880	18638760	9500760	7695960	18392020	11945160	0.649475	14523904	0.735098
	DAS41	C	3	NM_013787.2-821s1c1	TRCN0000088762	Skp2	27401	10090	1.3728e+08	21956320	21414320	13016120	18292920	12819800	21685320	1.47096e+07	0.678321	17499896	0.820886
	DAS41	D	5	NM_013787.2-2834s21c1	TRCN0000302319	Skp2	27401	10090	1.3728e+08	7881880	11415440	3960800	4399880	4443920	9648660	4268200	0.442362	6420384	0.31873
	DAS41	F	3	NM_013787.2-340s21c2	TRCN0000302320	Skp2	27401	10090	1.3728e+08	23774520	22218440	21322800	20552160	19652640	22996480	20509200	0.891841	21504112	1.00453
	DAS41	G	11	NM_013787.2-1201s21c1	TRCN0000302321	Skp2	27401	10090	1.3728e+08	19544160	21321400	13443160	12862040	11062440	20432780	12455880	0.609603	15646640	0.744596
	DAS41	H	4	NM_013787.2-1418s21c1	TRCN0000302380	Skp2	27401	10090	1.3728e+08	21477640	20476720	20172880	19914440	20589320	20977180	2.02255e+07	0.964169	20526200	0.961125
	DAS41	B	7	NM_015747.2-2494s21c1	TRCN0000317074	Slc20a1	20515	10090	1.2384e+08	22889280	22338920	21389760	20493120	17918320	22614100	1.99337e+07	0.881474	21005880	0.985816
	DAS41	C	5	NM_015747.2-997s21c1	TRCN0000313521	Slc20a1	20515	10090	1.3728e+08	14389920	13179120	7707200	7085920	8635440	13784520	7809520	0.566543	10199520	0.474229
	DAS41	D	1	NM_015747.1-864s1c1	TRCN0000068404	Slc20a1	20515	10090	1.2768e+08	24879520	21710120	22302040	22024560	19134680	23294820	21153760	0.908089	22010184	1.02075
	DAS41	E	1	NM_015747.2-1836s21c1	TRCN0000313451	Slc20a1	20515	10090	1.3728e+08	20480880	16267720	16635120	16619080	12631800	18374300	1.52953e+07	0.832431	16526920	0.757829
	DAS41	F	6	NM_015747.2-2925s21c1	TRCN0000313522	Slc20a1	20515	10090	1.3728e+08	21927000	18600680	17151520	15839200	13306280	20263840	1.54323e+07	0.76157	17364936	0.801434
	DAS40	A	1	NM_172685.1-1026s1c1	TRCN0000068316	Slc25a24	229731	10090	1.2864e+08	7309800	13694800	3815840	5561320	2878320	10502300	4085160	0.388978	6652016	0.376099
	DAS40	C	7	NM_172685.1-531s1c1	TRCN0000068315	Slc25a24	229731	10090	1.3728e+08	22241960	19496640	18946280	23713560	21336720	20869300	2.13322e+07	1.02218	21147032	1.19563
	DAS40	C	8	NM_172685.1-847s1c1	TRCN0000068314	Slc25a24	229731	10090	7.104e+07	18409840	19767680	7061160	9649200	12442600	19088760	9.71765e+06	0.509077	13466096	0.761361
	DAS40	E	5	NM_172685.1-352s1c1	TRCN0000068317	Slc25a24	229731	10090	1.0368e+08	24745120	27257480	25053960	26125600	27934120	26001300	2.63712e+07	1.01423	26223256	1.48264
	DAS40	E	9	NM_172685.1-1096s1c1	TRCN0000068313	Slc25a24	229731	10090	1.3728e+08	14588480	14123400	10093400	9628720	6844600	14355940	8.85557e+06	0.616858	11055720	0.62508
	DAS39	C	1	NM_011400.1-438s1c1	TRCN0000079330	Slc2a1	20525	10090	69120000	1782560	9203560	1320080	1709440	1062480	5493060	1364000	0.248313	3015624	0.177782
	DAS39	C	2	NM_011400.1-267s1c1	TRCN0000079329	Slc2a1	20525	10090	1.3728e+08	8987080	12089040	5958800	6037800	6089560	10538060	6028720	0.57209	7832456	0.461751
	DAS39	C	7	NM_011400.3-330s21c1	TRCN0000305719	Slc2a1	20525	10090	1.3728e+08	15050440	17588480	13980200	17179040	11900440	16319460	1.43532e+07	0.879516	15139720	0.89254
	DAS39	D	12	NM_011400.3-1361s21c1	TRCN0000311403	Slc2a1	20525	10090	4.032e+07	20566600	22194840	22583440	23175040	19334600	21380720	2.16977e+07	1.01483	21570904	1.27168
	DAS39	H	1	NM_011400.1-2356s1c1	TRCN0000079328	Slc2a1	20525	10090	1.3056e+08	15151560	16844360	9157000	6808520	7427320	15997960	7.79761e+06	0.487413	11077752	0.653072
	DAS45	A	3	NM_139143.1-2997s1c1	TRCN0000079618	Slc39a6	106957	10090	1.152e+08	18893160	21072320	20781840	22578680	18451160	19982740	2.06039e+07	1.03108	20355432	1.03581
	DAS45	F	6	NM_139143.3-2689s21c1	TRCN0000308539	Slc39a6	106957	10090	0	29300200	31785360	30688560	32567960	27543160	30542780	30266560	0.990956	30377048	1.54577
	DAS45	F	11	NM_139143.1-827s1c1	TRCN0000079619	Slc39a6	106957	10090	1.248e+08	27937640	28835240	29633520	31716400	21758000	28386440	27702640	0.975911	27976160	1.4236
	DAS45	G	10	NM_139143.3-1405s21c1	TRCN0000308540	Slc39a6	106957	10090	1.2384e+08	19027440	23570160	22006240	19041840	21072200	21298800	20706760	0.972203	20943576	1.06574
	DAS45	H	7	NM_139143.1-992s1c1	TRCN0000079621	Slc39a6	106957	10090	15360000	28454200	29295080	19420240	34659760	25018760	28874640	2.63663e+07	0.913128	27369608	1.39274
	DAS45	B	10	NM_017391.1-1603s1c1	TRCN0000070090	Slc5a3	53881	10090	1.3728e+08	17628960	15234640	10040280	14167200	8304880	16431800	1.08375e+07	0.659541	13075192	0.665347
	DAS45	D	3	NM_017391.3-2032s21c1	TRCN0000328431	Slc5a3	53881	10090	1.3728e+08	8029400	5935760	2692240	5312800	933240	6982580	2.97943e+06	0.426694	4580688	0.233094
	DAS45	D	7	NM_017391.1-1879s1c1	TRCN0000070092	Slc5a3	53881	10090	1.3728e+08	22607960	23091040	23304840	26655760	19612960	22849500	2.31912e+07	1.01495	23054512	1.17316
	DAS45	E	1	NM_017391.3-1082s21c1	TRCN0000328430	Slc5a3	53881	10090	1.3728e+08	17735880	14452000	12819760	20867560	10847640	16093940	1.4845e+07	0.922396	15344568	0.780827
	DAS45	H	5	NM_017391.1-587s1c1	TRCN0000070088	Slc5a3	53881	10090	1.3728e+08	25094320	20554160	12543640	29436680	14414960	22824240	1.87984e+07	0.823617	20408752	1.03852
	DAS41	B	4	NM_008017.3-5068s1c1	TRCN0000108950	Smc2	14211	10090	1.0368e+08	19441720	20266520	10167320	14317560	10879120	19854120	11788000	0.593731	15014448	0.710367
	DAS41	D	7	NM_008017.3-616s1c1	TRCN0000108951	Smc2	14211	10090	1.3728e+08	22574400	21039440	18118840	17322520	13756520	21806920	1.63993e+07	0.752022	18562344	0.866206
	DAS41	D	12	NM_008017.3-3358s1c1	TRCN0000108953	Smc2	14211	10090	7.968e+07	12265120	13805640	9297640	8055000	9433040	13035380	8928560	0.684948	10571288	0.504668
	DAS41	E	7	NM_008017.3-1888s21c1	TRCN0000302869	Smc2	14211	10090	1.3728e+08	19053200	20340880	7909160	10025960	8258560	19697040	8.73123e+06	0.443276	13117552	0.623289
	DAS41	E	9	NM_008017.3-1418s1c1	TRCN0000108954	Smc2	14211	10090	1.2672e+08	25325440	23294880	21220320	19893560	20529760	24310160	20547880	0.845238	22052792	1.02811
	DAS38	B	8	NM_011415.2-276s1c1	TRCN0000096225	Snai2	20583	10090	1.3728e+08	17996600	19458160	18972120	14125440	11804080	18727380	1.49672e+07	0.799216	16471280	0.83366
	DAS38	C	7	NM_011415.2-814s21c1	TRCN0000317660	Snai2	20583	10090	1.3728e+08	16181320	21823880	14312000	9384720	8493040	19002600	10729920	0.564655	14038992	0.710555
	DAS38	D	5	NM_011415.2-212s21c1	TRCN0000319552	Snai2	20583	10090	1.3728e+08	10801080	17274880	15830600	12592280	9377600	14037980	12600160	0.897576	13175288	0.66684
	DAS38	D	10	NM_011415.2-1185s21c1	TRCN0000350023	Snai2	20583	10090	1.3728e+08	8212880	12170080	10427880	7029440	4116600	10191480	7.19131e+06	0.705619	8391376	0.424712
	DAS38	G	4	NM_011415.2-265s21c1	TRCN0000350022	Snai2	20583	10090	1.3728e+08	19516200	22800000	17666720	12184360	8483160	21158100	12778080	0.603933	16130088	0.816392
	DAS44	A	3	NM_019654.2-1846s21c1	TRCN0000305116	Socs5	56468	10090	8.256e+07	26876120	27490720	21040040	22367280	14482400	27183420	1.92966e+07	0.709866	22451312	1.09851
	DAS44	A	4	NM_019654.2-517s1c1	TRCN0000105752	Socs5	56468	10090	1.3728e+08	27468680	21969480	16772560	19106600	13413800	24719080	1.6431e+07	0.664709	19746224	0.966154
	DAS44	C	12	NM_019654.2-1313s1c1	TRCN0000105753	Socs5	56468	10090	107520000	8164080	16394640	2048080	1796320	1168160	12279360	1.67085e+06	0.13607	5914256	0.289376
	DAS44	D	2	NM_019654.2-1286s21c1	TRCN0000349191	Socs5	56468	10090	1.3728e+08	26597560	24901800	13530000	15076840	12613920	25749680	1.37403e+07	0.533609	18544024	0.907332
	DAS44	D	3	NM_019654.2-1415s1c1	TRCN0000105754	Socs5	56468	10090	1.056e+08	31022920	29451480	25976800	28395440	18325840	30237200	2.42327e+07	0.80142	26634496	1.30319
	DAS43	B	1	NM_009234.1-1239s1c1	TRCN0000012102	Sox11	20666	10090	9.504e+07	20647520	25737680	14162600	7407560	19054440	23192600	1.35415e+07	0.583873	17401960	0.87682
	DAS43	B	9	NM_009234.6-1476s21c1	TRCN0000365907	Sox11	20666	10090	1.296e+08	22580160	24750360	12867960	12764840	17789240	23665260	1.4474e+07	0.611614	18150512	0.914536
	DAS43	F	5	NM_009234.1-2499s1c1	TRCN0000012098	Sox11	20666	10090	1.3728e+08	24962120	28608200	17740360	13523200	23527280	26785160	1.82636e+07	0.681856	21672232	1.09198
	DAS43	F	10	NM_009234.1-1092s1c1	TRCN0000012099	Sox11	20666	10090	7.968e+07	21507520	26843480	1154400	866640	1471400	24175500	1.16415e+06	0.048154	10368688	0.522439
	DAS43	F	11	NM_009234.1-1331s1c1	TRCN0000012100	Sox11	20666	10090	7.296e+07	16768040	19327280	2270400	945880	2508600	18047660	1.90829e+06	0.105736	8364040	0.421433
	DAS37	A	12	NM_011448.2-1231s1c1	TRCN0000086164	Sox9	20682	10090	1.3728e+08	20121160	21816560	17555160	24791880	21188440	20968860	2.11785e+07	1.01	21094640	1.26342
	DAS37	B	3	NM_011448.4-959s21c1	TRCN0000321490	Sox9	20682	10090	15360000	23541440	25667840	14557680	23830360	24444120	24604640	2.09441e+07	0.851224	22408288	1.3421
	DAS37	C	7	NM_011448.2-1744s1c1	TRCN0000086167	Sox9	20682	10090	1.3728e+08	14752560	14180680	1693680	13068120	6780800	14466620	7.18087e+06	0.496375	10095168	0.604628
	DAS37	G	10	NM_011448.2-944s1c1	TRCN0000086165	Sox9	20682	10090	1.2672e+08	20869680	22752040	10477080	26529520	24057880	21810860	2.03548e+07	0.933243	20937240	1.25399
	DAS37	H	5	NM_011448.4-1753s21c1	TRCN0000321420	Sox9	20682	10090	1.3728e+08	22380360	24710400	16653840	23915720	21094080	23545380	2.05545e+07	0.872976	21750880	1.30272
	DAS45	A	7	NM_025565.1-160s1c1	TRCN0000120656	Spc25	66442	10090	7.2e+07	3783600	1191360	740200	1052960	1011760	2487480	934973	0.375872	1555976	0.0791777
	DAS45	B	12	NM_025565.2-323s21c1	TRCN0000329346	Spc25	66442	10090	1.3728e+08	10986920	12587040	7484320	15773560	11007360	11786980	1.14217e+07	0.969014	11567840	0.588643
	DAS45	C	6	NM_025565.1-486s1c1	TRCN0000120653	Spc25	66442	10090	1.3728e+08	31239240	34124240	34215600	35826800	31792760	32681740	3.39451e+07	1.03866	33439728	1.70162
	DAS45	E	6	NM_025565.2-384s21c1	TRCN0000329347	Spc25	66442	10090	1.3728e+08	27432600	24978560	26389280	33108160	22018200	26205580	27171880	1.03687	26785360	1.36301
	DAS45	G	5	NM_025565.1-878s1c1	TRCN0000120652	Spc25	66442	10090	1.3728e+08	25122160	27369200	27352520	29293480	26133880	26245680	2.75933e+07	1.05135	27054248	1.37669
	DAS39	B	6	NM_009270.3-1314s21c1	TRCN0000327590	Sqle	20775	10090	1.3728e+08	14526560	16900520	6380760	8860880	2684680	15713540	5975440	0.380273	9870680	0.581911
	DAS39	B	11	NM_009270.3-1465s21c1	TRCN0000327508	Sqle	20775	10090	1.3728e+08	17131040	18027920	18298720	17042760	14513960	17579480	16618480	0.945334	17002880	1.00238
	DAS39	D	8	NM_009270.3-1738s21c1	TRCN0000327505	Sqle	20775	10090	1.0464e+08	13705560	17393960	15801080	16152880	11377160	15549760	1.44437e+07	0.92887	14886128	0.87759
	DAS39	G	8	NM_009270.3-2566s21c1	TRCN0000327509	Sqle	20775	10090	1.3728e+08	19954960	21630680	21204560	15161720	15418040	20792820	17261440	0.830163	18673992	1.1009
	DAS39	H	2	NM_009270.3-2335s21c1	TRCN0000327591	Sqle	20775	10090	1.3728e+08	18695760	18759880	19216760	17087880	17794480	18727820	18033040	0.962901	18310952	1.0795
	DAS39	E	10	NM_011570.2-570s1c1	TRCN0000099484	Tes	21753	10090	1.3728e+08	12528280	16235920	11210600	10352080	8048920	14382100	9.87053e+06	0.686307	11675160	0.688292
	DAS39	F	1	NM_011570.2-1893s1c1	TRCN0000099480	Tes	21753	10090	1.104e+08	20888760	21535480	21964080	22081320	19240800	21212120	21095400	0.994497	21142088	1.2464
	DAS39	F	9	NM_011570.2-631s1c1	TRCN0000099483	Tes	21753	10090	1.3728e+08	15697640	19298800	11967400	14655320	9564880	17498220	1.20625e+07	0.689358	14236808	0.83931
	DAS39	F	12	NM_011570.2-1488s1c1	TRCN0000099481	Tes	21753	10090	1.3728e+08	14585960	14951240	6247480	7066040	5743680	14768600	6352400	0.430129	9718880	0.572962
	DAS39	G	3	NM_011570.2-1611s1c1	TRCN0000099482	Tes	21753	10090	1.3728e+08	16327120	16169720	8418560	8599720	4680920	16248420	7.23307e+06	0.445155	10839208	0.639009
	DAS40	C	12	NM_009365.2-1573s1c1	TRCN0000075521	Tgfb1i1	21804	10090	5.952e+07	14408840	11571640	7350400	8451240	7812200	12990240	7871280	0.605938	9918864	0.560804
	DAS40	E	1	NM_009365.2-2571s1c1	TRCN0000075519	Tgfb1i1	21804	10090	1.2768e+08	12075680	16062440	8794600	9757360	7288520	14069060	8.61349e+06	0.612229	10795720	0.61038
	DAS40	F	7	NM_009365.2-2885s1c1	TRCN0000075518	Tgfb1i1	21804	10090	1.0944e+08	15658080	18450960	5039760	7592760	8527040	17054520	7.05319e+06	0.413567	11053720	0.624967
	DAS40	G	1	NM_009365.2-1570s1c1	TRCN0000075520	Tgfb1i1	21804	10090	1.056e+08	17568000	19250480	18857240	12175360	15141480	18409240	15391360	0.836067	16598512	0.938465
	DAS40	G	5	NM_009365.2-2145s1c1	TRCN0000075522	Tgfb1i1	21804	10090	8.736e+07	10986640	16380480	1803840	4063800	2143920	13683560	2670520	0.195163	7075736	0.400056
	DAS45	D	10	NM_009372.2-1080s21c1	TRCN0000233981	Tgif1	21815	10090	1.3728e+08	6910320	8927760	6882160	9867800	6859360	7919040	7.86977e+06	0.993779	7889480	0.401466
	DAS45	F	2	NM_009372.2-1195s21c1	TRCN0000218560	Tgif1	21815	10090	1.3728e+08	15614400	13361320	6536440	18548880	6749120	14487860	10611480	0.732439	12162032	0.61888
	DAS45	F	7	NM_009372.2-671s21c1	TRCN0000233979	Tgif1	21815	10090	1.3728e+08	18704720	19749560	18164640	18891080	17151400	19227140	18069040	0.939767	18532280	0.943037
	DAS45	F	12	NM_009372.2-911s21c1	TRCN0000233980	Tgif1	21815	10090	1.3728e+08	14279080	6255440	4045600	12729560	2621800	10267260	6.46565e+06	0.629735	7986296	0.406392
	DAS45	G	3	NM_009372.2-632s1c1	TRCN0000055050	Tgif1	21815	10090	1.3728e+08	27882320	29918560	29773200	34276400	19011280	28900440	27686960	0.958012	28172352	1.43358
	DAS42	A	9	NM_011593.1-120s1c1	TRCN0000080038	Timp1	21857	10090	8.736e+07	8772440	4142880	3146120	5816360	1245960	6457660	3.40281e+06	0.526942	4624752	0.192783
	DAS42	D	9	NM_011593.1-167s1c1	TRCN0000080039	Timp1	21857	10090	1.008e+08	25989480	25874040	12586200	25948520	20977240	25931760	19837320	0.764982	22275096	1.1739
	DAS42	E	11	NM_011593.1-36s1c1	TRCN0000080042	Timp1	21857	10090	107520000	21222160	23095800	12214480	19407640	9507880	22158980	13710000	0.618711	17089592	0.792463
	DAS42	F	10	NM_011593.2-706s21c1	TRCN0000414624	Timp1	21857	10090	1.0368e+08	23182600	22248200	10653040	22526400	13038800	22715400	15406080	0.678222	18329808	0.894749
	DAS42	G	2	NM_011593.1-470s1c1	TRCN0000080041	Timp1	21857	10090	1.3728e+08	22559520	21983160	16452480	20397760	14928680	22271340	17259640	0.774971	19264320	0.93093
	DAS43	B	7	NM_021436.1-908s1c1	TRCN0000080494	Tmeff1	230157	10090	9.408e+07	15557120	16803240	1243920	934600	4117760	16180180	2098760	0.129712	7731328	0.389553
	DAS43	B	8	NM_021436.1-1265s1c1	TRCN0000080495	Tmeff1	230157	10090	9.984e+07	21918160	24722520	8717320	4709200	12212600	23320340	8.54637e+06	0.366477	14455960	0.728382
	DAS43	D	1	NM_021436.1-1725s1c1	TRCN0000080493	Tmeff1	230157	10090	8.064e+07	23583240	25593040	16616240	3967080	17586040	24588140	12723120	0.517449	17469128	0.880204
	DAS43	F	3	NM_021436.1-1237s1c1	TRCN0000080496	Tmeff1	230157	10090	1.248e+08	22538520	26882360	17891800	8792720	23057920	24710440	1.65808e+07	0.671004	19832664	0.999294
	DAS43	F	7	NM_021436.1-549s1c1	TRCN0000080497	Tmeff1	230157	10090	1.0176e+08	19442000	22429840	3812360	1338520	5637920	20935920	3.59627e+06	0.171775	10532128	0.530675
	DAS42	B	1	NM_011607.2-2342s21c1	TRCN0000313073	Tnc	21923	10090	1.3728e+08	22663520	7609120	13507600	15210240	7124360	15136320	11947400	0.78932	13222968	0.557073
	DAS42	B	4	NM_011607.2-6168s21c1	TRCN0000349876	Tnc	21923	10090	1.2e+08	8899880	5737640	990280	2302880	527760	7318760	1273640	0.174024	3691688	0.196359
	DAS42	F	6	NM_011607.2-2995s21c1	TRCN0000312137	Tnc	21923	10090	3840000	31633280	30276840	16561680	26196800	18273040	30955060	20343840	0.657206	24588328	1.23193
	DAS42	G	1	NM_011607.2-6250s21c1	TRCN0000312138	Tnc	21923	10090	960000	27853080	28351400	4686000	10220240	6153280	28102240	7019840	0.249796	15452800	0.857244
	DAS42	G	10	NM_011607.2-2069s21c1	TRCN0000349824	Tnc	21923	10090	2.4e+07	22101920	19706880	12029400	16555040	10371160	20904400	12985200	0.621171	16152880	0.782671
	DAS38	B	10	NM_011623.2-2972s21c1	TRCN0000325431	Top2a	21973	10090	1.3728e+08	18217280	20679280	18271080	12890280	8660400	19448280	13273920	0.682524	15743664	0.796833
	DAS38	C	2	NM_011623.2-3274s21c1	TRCN0000325430	Top2a	21973	10090	1.3728e+08	27937400	27853720	27005240	25023080	25511520	27895560	2.58466e+07	0.926549	26666192	1.34965
	DAS38	D	6	NM_011623.2-3939s21c1	TRCN0000353984	Top2a	21973	10090	1.3728e+08	23111760	25843640	26540120	20976840	19350240	24477700	2.22891e+07	0.910587	23164520	1.17242
	DAS38	G	12	NM_011623.1-970s1c1	TRCN0000070987	Top2a	21973	10090	1.3728e+08	19985280	23579560	20938000	13008520	16288280	21782420	1.67449e+07	0.768736	18759928	0.949495
	DAS38	H	7	NM_011623.2-1897s21c1	TRCN0000325493	Top2a	21973	10090	1.3728e+08	24390000	27219240	27468480	20724200	24616760	25804620	2.42698e+07	0.940522	24883736	1.25944
	DAS37	B	2	NM_011627.2-1890s1c1	TRCN0000193433	Tpbg	21983	10090	1920000	24202280	25913480	537480	993600	1259440	25057880	930173	0.037121	10581256	0.633741
	DAS37	B	6	NM_011627.2-1592s1c1	TRCN0000176374	Tpbg	21983	10090	1.3728e+08	16548280	10695840	8161080	18331720	15489360	13622060	1.39941e+07	1.02731	13845256	0.829231
	DAS37	B	7	NM_011627.2-1653s1c1	TRCN0000193488	Tpbg	21983	10090	1.3728e+08	23474600	22928520	20471480	28637000	25435520	23201560	24848000	1.07096	24189424	1.44877
	DAS37	D	1	NM_011627.2-1734s1c1	TRCN0000175578	Tpbg	21983	10090	7.776e+07	23028840	23690360	18823600	23661000	22908600	23359600	2.17977e+07	0.933138	22422480	1.34295
	DAS44	D	1	XM_127444.3-432s1c1	TRCN0000024992	Trip13	69716	10090	1.104e+08	22224520	21435600	15323440	15669920	11567800	21830060	1.41871e+07	0.649886	17244256	0.843737
	DAS44	F	8	NM_027182.2-654s21c1	TRCN0000319690	Trip13	69716	10090	9.408e+07	11349960	12063760	1574400	2667920	2386560	11706860	2.20963e+06	0.188746	6008520	0.293988
	DAS44	G	7	XM_127444.3-1025s1c1	TRCN0000024989	Trip13	69716	10090	1.3728e+08	24440280	19850320	15597640	12935080	13347200	22145300	1.396e+07	0.630381	17234104	0.84324
	DAS44	G	8	XM_127444.3-1458s1c1	TRCN0000024993	Trip13	69716	10090	1.3536e+08	28621320	27579920	22638400	22845600	17268720	28100620	2.09176e+07	0.744381	23790792	1.16405
	DAS44	H	4	XM_127444.3-309s1c1	TRCN0000024991	Trip13	69716	10090	1.3536e+08	25351720	27333960	19428200	18568120	15768160	26342840	1.79215e+07	0.680317	21290032	1.04169
	DAS39	A	4	NM_011653.1-711s1c1	TRCN0000123590	Tuba1a	22142	10090	4.896e+07	14351080	18655640	8467160	10983560	5024760	16503360	8.15849e+06	0.494353	11496440	0.677756
	DAS39	C	4	NM_011653.1-332s1c1	TRCN0000123593	Tuba1a	22142	10090	1.3728e+08	3693440	12308640	2294880	1267640	984960	8001040	1.51583e+06	0.189454	4109912	0.242294
	DAS39	C	11	NM_011653.1-1324s1c1	TRCN0000123591	Tuba1a	22142	10090	1.0368e+08	10298160	16669800	4681320	5171640	2360960	13483980	4.07131e+06	0.301937	7836376	0.461982
	DAS39	F	4	NM_011653.1-868s1c1	TRCN0000123592	Tuba1a	22142	10090	1.3728e+08	15400240	15668120	5957520	4666280	2973320	15534180	4.53237e+06	0.291768	8933096	0.526637
	DAS39	G	2	NM_011653.1-1430s1c1	TRCN0000123589	Tuba1a	22142	10090	1.3728e+08	19582040	21230200	22616560	21662560	19719600	20406120	2.13329e+07	1.04542	20962192	1.2358
	DAS36	B	8	NM_009450.1-1458s21c1	TRCN0000287368	Tubb2a	22151	10090	1.3728e+08	10741200	17340080	18309600	15654840	18695880	14040640	17553440	1.25019	16148320	0.938484
	DAS36	D	9	NM_009450.1-1390s21c1	TRCN0000294795	Tubb2a	22151	10090	1.3344e+08	4816400	7131640	3711720	1772160	6785360	5974020	4.08975e+06	0.684589	4843456	0.281485
	DAS36	F	1	NM_009450.1-661s1c1	TRCN0000089929	Tubb2a	22151	10090	9.696e+07	9336480	13293520	11887000	9345200	15187560	11315000	12139920	1.0729	11809952	0.686353
	DAS36	F	12	NM_009450.1-1431s21c1	TRCN0000294793	Tubb2a	22151	10090	1.3728e+08	13627880	21753200	24817840	17580200	23399920	17690540	2.19327e+07	1.2398	20235808	1.17603
	DAS36	G	9	NM_009450.1-129s21c1	TRCN0000294794	Tubb2a	22151	10090	1.3728e+08	9681600	11964160	7506440	5340160	6481800	10822880	6442800	0.595294	8194832	0.476255
	DAS42	B	12	NM_026473.2-170s1c1	TRCN0000090329	Tubb6	67951	10090	4.512e+07	22686320	21216040	18416880	23476480	17447960	21951180	19780440	0.901111	20648736	0.985963
	DAS42	C	7	NM_026473.2-732s21c1	TRCN0000353886	Tubb6	67951	10090	1.1136e+08	23290520	23519800	24021760	22235800	17482680	23405160	2.12467e+07	0.90778	22110112	1.02322
	DAS42	E	3	NM_026473.2-1375s1c1	TRCN0000090328	Tubb6	67951	10090	1.3728e+08	11274280	12001160	3244840	8187800	1721280	11637720	4384640	0.376761	7285872	0.334309
	DAS42	E	7	NM_026473.2-177s1c1	TRCN0000090331	Tubb6	67951	10090	4.992e+07	28012720	29307400	28719480	28310880	25904360	28660060	2.76449e+07	0.96458	28050968	1.36547
	DAS42	H	8	NM_026473.2-1330s1c1	TRCN0000090332	Tubb6	67951	10090	46080000	25777400	22698560	11079000	20573120	13959440	24237980	1.52039e+07	0.627274	18817504	0.95589
	DAS40	A	5	NM_026785.2-543s21c1	TRCN0000241132	Ube2c	68612	10090	1.008e+08	8499440	13758480	5729840	10275480	5273680	11128960	7093000	0.637346	8707384	0.492308
	DAS40	A	10	NM_026785.2-176s21c1	TRCN0000241130	Ube2c	68612	10090	1.2672e+08	10997880	10541480	1225640	3856560	3740640	10769680	2.94095e+06	0.273077	6072440	0.34333
	DAS40	B	4	NM_026785.2-271s21c1	TRCN0000241129	Ube2c	68612	10090	1.3728e+08	7175040	7721880	1064120	917360	1720760	7448460	1234080	0.165683	3719832	0.210316
	DAS40	F	4	NM_026785.2-643s21c1	TRCN0000241131	Ube2c	68612	10090	1.3728e+08	12471040	8064840	5106080	9727560	11884000	10267940	8905880	0.867348	9450704	0.534334
	DAS40	G	6	NM_026785.2-409s21c1	TRCN0000241128	Ube2c	68612	10090	1.3728e+08	10488800	15646760	8521160	7544480	10650800	13067780	8905480	0.681484	10570400	0.597641
	DAS37	B	4	NM_029770.1-3092s1c1	TRCN0000072078	Unc5b	107449	10090	1.2e+08	21935880	23584040	19821640	26480920	22606800	22759960	2.29698e+07	1.00922	22885856	1.3707
	DAS37	B	5	NM_029770.1-2160s1c1	TRCN0000072082	Unc5b	107449	10090	1.3728e+08	20733360	23514720	21048440	25256320	24010520	22124040	2.34384e+07	1.05941	22912672	1.3723
	DAS37	D	7	NM_029770.1-1128s1c1	TRCN0000072081	Unc5b	107449	10090	1.1904e+08	20562760	18848960	6009600	20898840	10078400	19705860	1.23289e+07	0.625649	15279712	0.915145
	DAS37	E	2	NM_029770.1-2444s1c1	TRCN0000072080	Unc5b	107449	10090	1.3728e+08	17355280	18550120	7608400	18744800	20653200	17952700	15668800	0.872782	16582360	0.993164
	DAS37	F	9	NM_029770.1-584s1c1	TRCN0000072079	Unc5b	107449	10090	1.008e+08	25620600	25788160	21152680	30621400	27667600	25704380	26480560	1.0302	26170088	1.5674
	DAS42	A	2	NM_001081249.1-8701s21c1	TRCN0000240553	Vcan	13003	10090	1.3728e+08	22893920	19276600	18514160	22815400	15316360	21085260	1.8882e+07	0.895506	19763288	0.91095
	DAS42	A	5	NM_001081249.1-698s21c1	TRCN0000240555	Vcan	13003	10090	8.448e+07	14556760	5173920	1406800	5443720	1605560	9865340	2.81869e+06	0.285717	5637352	0.287059
	DAS42	A	10	NM_001081249.1-8459s21c1	TRCN0000240554	Vcan	13003	10090	7.2e+07	25087600	26594920	25177880	27062480	21632920	25841260	2.46244e+07	0.952911	25111160	1.18804
	DAS42	C	5	NM_001081249.1-475s1c1	TRCN0000217686	Vcan	13003	10090	5.664e+07	21974640	20188160	14862840	21958040	13712280	21081400	1.68444e+07	0.799017	18539192	0.870712
	DAS42	G	5	NM_001081249.1-4748s1c1	TRCN0000216596	Vcan	13003	10090	1.3632e+08	24685360	26123200	14923320	25779840	14162800	25404280	1.82887e+07	0.719904	21134904	0.990166
	DAS40	B	10	NM_025635.1-1523s1c1	TRCN0000125654	Zwint	52696	10090	9.024e+07	17805160	18326040	12906960	10240400	15699240	18065600	1.29489e+07	0.716769	14995560	0.847835
	DAS40	C	5	NM_025635.1-132s1c1	TRCN0000125655	Zwint	52696	10090	9.12e+07	9188560	14210760	3954760	5433640	10016760	11699660	6.46839e+06	0.55287	8560896	0.484025
	DAS40	E	12	NM_025635.1-453s1c1	TRCN0000125658	Zwint	52696	10090	5.088e+07	11469080	14875880	3103640	4733160	4968560	13172480	4.26845e+06	0.324043	7830064	0.442705
	DAS40	F	1	NM_025635.1-296s1c1	TRCN0000125657	Zwint	52696	10090	6.24e+07	22543440	24440920	23980120	24902640	21699760	23492180	2.35275e+07	1.0015	23513376	1.32942
	DAS40	G	4	NM_025635.1-711s1c1	TRCN0000125656	Zwint	52696	10090	9.696e+07	21219600	21754080	18701560	22296200	20261560	21486840	2.04198e+07	0.950339	20846600	1.17865
	DAS36	C	2	lacZ_1758s1c1	TRCN0000072242	lacZ		control	9.024e+07	7227960	8994800	4368120	2184000	3520720	8111380	3.35761e+06	0.413939	5259120	0.305642
	DAS36	G	2	lacZ_305s1c1	TRCN0000072236	lacZ		control	1.3728e+08	11478640	20062480	14072480	13442680	14939160	15770560	14151440	0.897333	14799088	0.860072
	DAS37	D	10	lacZ_1758s1c1	TRCN0000072242	lacZ		control	1.3728e+08	4730120	9028960	1192960	4442560	1847800	6879540	2494440	0.362588	4248480	0.254453
	DAS37	E	1	lacZ_305s1c1	TRCN0000072236	lacZ		control	1.3728e+08	13892400	14924720	5300960	15184240	15778000	14408560	1.20877e+07	0.838927	13016064	0.779569
	DAS38	E	11	lacZ_305s1c1	TRCN0000072236	lacZ		control	1.3728e+08	15427040	23815520	18714320	7930640	8754280	19621280	1.17997e+07	0.601375	14928360	0.755568
	DAS38	G	5	lacZ_1758s1c1	TRCN0000072242	lacZ		control	1.3728e+08	14727680	18397400	9055000	5680920	3569640	16562540	6.10185e+06	0.368413	10286128	0.520611
	DAS39	D	1	lacZ_305s1c1	TRCN0000072236	lacZ		control	122880000	14502320	16722560	14685920	11664840	8179320	15612440	1.151e+07	0.737234	13150992	0.775297
	DAS39	E	1	lacZ_1758s1c1	TRCN0000072242	lacZ		control	1.3728e+08	5769480	9984280	4920160	4204440	4116360	7876880	4.41365e+06	0.56033	5798944	0.341868
	DAS40	D	6	lacZ_1758s1c1	TRCN0000072242	lacZ		control	9.024e+07	8721000	11373120	3372960	5017680	6455960	10047060	4.94887e+06	0.492569	6988144	0.395103
	DAS40	H	2	lacZ_305s1c1	TRCN0000072236	lacZ		control	2.88e+07	12666160	18063360	11230040	11254880	8107680	15364760	1.01975e+07	0.663696	12264424	0.693419
	DAS41	A	2	lacZ_305s1c1	TRCN0000072236	lacZ		control	9.024e+07	22477520	22510320	18462360	14634800	15876520	22493920	16324560	0.725732	18792304	0.884403
	DAS41	B	5	lacZ_1758s1c1	TRCN0000072242	lacZ		control	1920000	30096600	29736760	188280	173720	173240	29916680	178413	0.00596367	12073720	0.566421
	DAS42	A	3	lacZ_1758s1c1	TRCN0000072242	lacZ		control	26880000	21461680	20717200	6500200	12554000	6632080	21089440	8.56209e+06	0.40599	13573032	0.693731
	DAS42	B	8	lacZ_305s1c1	TRCN0000072236	lacZ		control	1.0656e+08	13363000	15472360	13522440	15175840	7457280	14417680	1.20519e+07	0.835908	12998184	0.547421
	DAS43	F	1	lacZ_1758s1c1	TRCN0000072242	lacZ		control	8.352e+07	20760160	22436200	7185320	4321320	8915840	21598180	6.80749e+06	0.315188	12723768	0.641103
	DAS43	G	4	lacZ_305s1c1	TRCN0000072236	lacZ		control	1.2672e+08	22918960	23942080	7870240	2979800	12294560	23430520	7.71487e+06	0.329266	14001128	0.705464
	DAS44	E	2	lacZ_1758s1c1	TRCN0000072242	lacZ		control	107520000	18543160	19508760	7836720	6493360	7307680	19025960	7.21259e+06	0.379092	11937936	0.584106
	DAS44	F	3	lacZ_305s1c1	TRCN0000072236	lacZ		control	1.3728e+08	24630360	23800440	11380520	9847880	7424200	24215400	9.55087e+06	0.394413	15416680	0.754316
	DAS45	B	8	lacZ_1758s1c1	TRCN0000072242	lacZ		control	1.1328e+08	6807760	10047800	5431160	6762040	3700280	8427780	5.29783e+06	0.628615	6549808	0.333295
	DAS45	E	11	lacZ_305s1c1	TRCN0000072236	lacZ		control	1.3728e+08	17753080	16606520	9168240	21960560	8098200	17179800	1.30757e+07	0.761107	14717320	0.748908
	DAS36	B	1	promegaLuc_229s1c1	TRCN0000072250	LUCIFERASE		control	1.632e+07	18129520	22413400	16686760	18616520	22432800	20271460	19245360	0.949382	19655800	1.14233
	DAS36	G	1	promegaLuc_755s1c1	TRCN0000072261	LUCIFERASE		control	1.0464e+08	18517720	21577120	23128440	20880200	21958640	20047420	2.19891e+07	1.09685	21212424	1.23279
	DAS37	A	3	promegaLuc_229s1c1	TRCN0000072250	LUCIFERASE		control	960000	24547560	25320480	125680	170240	161040	24934020	152320	0.00610892	10065000	0.602821
	DAS37	B	8	promegaLuc_755s1c1	TRCN0000072261	LUCIFERASE		control	1.3728e+08	21978200	23680880	21793280	25843400	26721840	22829540	2.47862e+07	1.08571	24003520	1.43764
	DAS38	F	9	promegaLuc_755s1c1	TRCN0000072261	LUCIFERASE		control	1.3728e+08	27863040	28626840	26081960	21642080	19520160	28244940	2.24147e+07	0.793584	24746816	1.25251
	DAS38	G	3	promegaLuc_229s1c1	TRCN0000072250	LUCIFERASE		control	7.296e+07	25809800	27965480	22429600	17815800	18004960	26887640	1.94168e+07	0.722145	22405128	1.13399
	DAS39	F	10	promegaLuc_755s1c1	TRCN0000072261	LUCIFERASE		control	1.3728e+08	20299000	22369800	23812560	22555120	23465320	21334400	2.32777e+07	1.09109	22500360	1.32648
	DAS39	G	9	promegaLuc_229s1c1	TRCN0000072250	LUCIFERASE		control	1.1136e+08	19776240	20704360	20949000	19881880	16510160	20240300	19113680	0.944338	19564328	1.15339
	DAS40	C	9	promegaLuc_229s1c1	TRCN0000072250	LUCIFERASE		control	107520000	19923880	21779400	19586120	16471360	20160720	20851640	18739400	0.898701	19584296	1.10728
	DAS40	E	4	promegaLuc_755s1c1	TRCN0000072261	LUCIFERASE		control	1.104e+08	23250320	24384920	22072520	22951480	22376920	23817620	2.2467e+07	0.943292	23007232	1.30081
	DAS41	C	4	promegaLuc_229s1c1	TRCN0000072250	LUCIFERASE		control	1.3344e+08	23677720	23243240	22932360	22969800	22718440	23460480	2.28735e+07	0.974981	23108312	1.08529
	DAS41	G	7	promegaLuc_755s1c1	TRCN0000072261	LUCIFERASE		control	1.3728e+08	26043680	24593920	24541600	22436200	23432760	25318800	2.34702e+07	0.926987	24209632	1.13233
	DAS42	E	10	promegaLuc_755s1c1	TRCN0000072261	LUCIFERASE		control	1.2096e+08	27981000	27056920	26181840	29159040	23164920	27518960	26168600	0.95093	26708744	1.26836
	DAS42	H	5	promegaLuc_229s1c1	TRCN0000072250	LUCIFERASE		control	8.256e+07	25419280	25534920	23691800	26061040	22348040	25477100	2.40336e+07	0.943342	24611016	1.19682
	DAS43	C	6	promegaLuc_755s1c1	TRCN0000072261	LUCIFERASE		control	1.0272e+08	27853960	30891280	25850880	17231800	31993480	29372620	2.50254e+07	0.851997	26764280	1.34855
	DAS43	C	12	promegaLuc_229s1c1	TRCN0000072250	LUCIFERASE		control	5.184e+07	21245840	22033200	18925880	18715760	18010320	21639520	1.85507e+07	0.857258	19786200	0.996953
	DAS44	F	10	promegaLuc_229s1c1	TRCN0000072250	LUCIFERASE		control	7.776e+07	24555400	24602720	22104840	24487040	15127240	24579060	20573040	0.837015	22175448	1.08501
	DAS44	H	7	promegaLuc_755s1c1	TRCN0000072261	LUCIFERASE		control	8.16e+07	26027520	25826480	20749680	24863440	20479160	25927000	22030760	0.849723	23589256	1.15419
	DAS45	C	5	promegaLuc_755s1c1	TRCN0000072261	LUCIFERASE		control	1.3056e+08	25058360	27403280	25074440	28324320	20157040	26230820	24518600	0.934725	25203488	1.28251
	DAS45	G	12	promegaLuc_229s1c1	TRCN0000072250	LUCIFERASE		control	1.3728e+08	25707680	19963280	27187480	29255280	24673520	22835480	27038760	1.18407	25357448	1.29034
	DAS36	A	11	rfp_188s1c1	TRCN0000072209	RFP		control	1.3728e+08	14803880	20477600	22301720	19870640	17368520	17640740	19846960	1.12506	18964472	1.10215
	DAS36	B	11	rfp_401s1c1	TRCN0000072212	RFP		control	1.3728e+08	14171000	18475560	25612760	18592160	19389600	16323280	2.11982e+07	1.29865	19248216	1.11864
	DAS36	E	8	rfp_269s1c1	TRCN0000072208	RFP		control	1.3728e+08	22041920	21833560	21578120	16128760	24960320	21937740	2.08891e+07	0.952198	21308536	1.23838
	DAS37	D	3	rfp_188s1c1	TRCN0000072209	RFP		control	1.3728e+08	16255440	18412960	16446040	22065000	19572520	17334200	1.93612e+07	1.11694	18550392	1.11104
	DAS37	E	4	rfp_269s1c1	TRCN0000072208	RFP		control	7.296e+07	24687960	26040160	19217960	28729360	27556280	25364060	2.51679e+07	0.992265	25246344	1.51207
	DAS37	E	7	rfp_401s1c1	TRCN0000072212	RFP		control	1.344e+08	20213480	25591720	12484320	28273680	22165000	22902600	2.09743e+07	0.915806	21745640	1.30241
	DAS38	A	3	rfp_188s1c1	TRCN0000072209	RFP		control	1.3728e+08	22753400	25432960	23024720	19974640	18002760	24093180	20334040	0.843975	21837696	1.10527
	DAS38	E	10	rfp_401s1c1	TRCN0000072212	RFP		control	1.3728e+08	20959880	25937960	25914960	18237360	17026040	23448920	2.03928e+07	0.869668	21615240	1.09401
	DAS38	F	3	rfp_269s1c1	TRCN0000072208	RFP		control	1.3728e+08	27982680	29028240	26474000	19555280	9385440	28505460	1.84716e+07	0.648001	22485128	1.13804
	DAS39	A	2	rfp_269s1c1	TRCN0000072208	RFP		control	2.592e+07	19829240	20823320	19235000	20145080	15643600	20326280	1.83412e+07	0.902341	19135248	1.12809
	DAS39	B	3	rfp_188s1c1	TRCN0000072209	RFP		control	1.3728e+08	18854240	19457120	17780600	19313440	16419000	19155680	17837680	0.931195	18364880	1.08267
	DAS39	H	5	rfp_401s1c1	TRCN0000072212	RFP		control	9.504e+07	20190880	22498800	20739040	20781800	16903760	21344840	1.94749e+07	0.912392	20222856	1.19221
	DAS40	A	2	rfp_188s1c1	TRCN0000072209	RFP		control	8.64e+07	13529640	20090400	14719480	15088880	15780920	16810020	1.51964e+07	0.90401	15841864	0.895685
	DAS40	E	6	rfp_401s1c1	TRCN0000072212	RFP		control	8.736e+07	24692120	26411920	22508920	22283880	20200680	25552020	2.16645e+07	0.847858	23219504	1.31281
	DAS40	F	9	rfp_269s1c1	TRCN0000072208	RFP		control	53760000	24062040	25021240	23176640	23060880	19192640	24541640	2.18101e+07	0.888696	22902688	1.2949
	DAS41	B	6	rfp_269s1c1	TRCN0000072208	RFP		control	6.432e+07	30071640	29646040	28293880	23467880	27271160	29858840	2.63443e+07	0.882295	27750120	1.30374
	DAS41	E	12	rfp_401s1c1	TRCN0000072212	RFP		control	1.008e+08	26321640	22425160	20813920	23973800	18525720	24373400	21104480	0.865882	22412048	1.03624
	DAS41	H	7	rfp_188s1c1	TRCN0000072209	RFP		control	1.248e+08	24007440	22263320	21333720	19112840	19520760	23135380	1.99891e+07	0.864006	21247616	0.991574
	DAS42	A	8	rfp_188s1c1	TRCN0000072209	RFP		control	4.32e+07	22419800	22543840	22577920	24325280	15377280	22481820	20760160	0.92342	21448824	0.947424
	DAS42	E	5	rfp_269s1c1	TRCN0000072208	RFP		control	42240000	29477480	28662040	22828880	30169920	22733840	29069760	2.52442e+07	0.868401	26774432	1.29638
	DAS42	F	12	rfp_401s1c1	TRCN0000072212	RFP		control	5.28e+07	25194480	26544440	23994120	27915360	16082720	25869460	2.26641e+07	0.876094	23946224	1.04985
	DAS43	A	5	rfp_269s1c1	TRCN0000072208	RFP		control	3.936e+07	26632880	27804880	19047520	17000360	25633920	27218880	20560600	0.75538	23223912	1.17017
	DAS43	C	4	rfp_401s1c1	TRCN0000072212	RFP		control	1.3728e+08	26170160	28797680	20340200	18055200	24453240	27483920	2.09495e+07	0.762247	23563296	1.18727
	DAS43	D	11	rfp_188s1c1	TRCN0000072209	RFP		control	1.0656e+08	22547800	25698040	14647600	11165120	20262320	24122920	1.53583e+07	0.63667	18864176	0.950495
	DAS44	A	7	rfp_269s1c1	TRCN0000072208	RFP		control	9.792e+07	30209960	27048680	23963760	25029640	17216760	28629320	2.20701e+07	0.77089	24693760	1.20823
	DAS44	F	4	rfp_188s1c1	TRCN0000072209	RFP		control	1.152e+08	25894920	26339920	21557560	21379920	14185080	26117420	1.90409e+07	0.729048	21871480	1.07014
	DAS44	G	10	rfp_401s1c1	TRCN0000072212	RFP		control	7.104e+07	28510960	28165000	22480720	20212160	17537040	28337980	20076640	0.708471	23381176	1.14401
	DAS45	A	8	rfp_269s1c1	TRCN0000072208	RFP		control	1.0272e+08	24902680	20765520	20399920	29083080	23481600	22834100	2.43215e+07	1.06514	23726560	1.20735
	DAS45	B	1	rfp_401s1c1	TRCN0000072212	RFP		control	107520000	22686120	16370280	17988480	25953800	13160360	19528200	1.90342e+07	0.974704	19231808	0.978633
	DAS45	G	2	rfp_188s1c1	TRCN0000072209	RFP		control	1.3728e+08	21810680	22249800	23734560	24423240	21658920	22030240	23272240	1.05638	22775440	1.15896
	DAS36	H	9	PGW	TRCN0000145620			control	4.032e+07	22023200	25377200	14337960	19475840	17612080	23700200	17141960	0.723283	19765256	1.14869
	DAS36	H	10	PGW	TRCN0000145620			control	4.416e+07	22471640	24990280	21061160	25164000	24793960	23730960	23673040	0.997559	23696208	1.37714
	DAS37	H	9	PGW	TRCN0000145620			control	3.552e+07	28144520	29113560	21938960	27354840	30381520	28629040	26558440	0.927675	27386680	1.64027
	DAS37	H	10	PGW	TRCN0000145620			control	3.36e+07	27382200	28878960	22328760	28176680	29318760	28130580	2.66081e+07	0.945877	27217072	1.63011
	DAS38	H	9	PGW	TRCN0000145620			control	42240000	26915880	27458920	17281560	14523440	18571360	27187400	16792120	0.617643	20950232	1.06035
	DAS38	H	10	PGW	TRCN0000145620			control	4.896e+07	27046760	26170080	17878200	17568760	19112560	26608420	1.81865e+07	0.683487	21555272	1.09098
	DAS39	H	9	PGW	TRCN0000145620			control	2.976e+07	19606960	21953960	15987040	17283200	9099920	20780460	1.41234e+07	0.679647	16786216	0.989607
	DAS39	H	10	PGW	TRCN0000145620			control	26880000	19254160	20806080	10621680	8233960	3585000	20030120	7.48021e+06	0.373448	12500176	0.736929
	DAS40	H	9	PGW	TRCN0000145620			control	30720000	21472600	24404200	14648920	16223160	7470920	22938400	12781000	0.557188	16843960	0.952342
	DAS40	H	10	PGW	TRCN0000145620			control	2.976e+07	22685560	24557000	18835000	13960920	10113480	23621280	1.43031e+07	0.605519	18030392	1.01942
	DAS41	H	9	PGW	TRCN0000145620			control	4.32e+07	27089480	26231480	26596000	17545680	21343480	26660480	2.18284e+07	0.818754	23761224	1.11402
	DAS41	H	10	PGW	TRCN0000145620			control	42240000	27145680	25902800	26378280	20693400	24555480	26524240	23875720	0.900147	24935128	1.16744
	DAS42	H	9	PGW	TRCN0000145620			control	30720000	30221920	29918280	21457160	25472840	19737600	30070100	2.22225e+07	0.739024	25361560	1.24644
	DAS42	H	10	PGW	TRCN0000145620			control	0	29508240	28691200	18176320	29946360	20021600	29099720	22714760	0.780583	25268744	1.22926
	DAS43	H	9	PGW	TRCN0000145620			control	2.784e+07	24143720	25762320	15290200	6672000	14822480	24953020	12261560	0.491386	17338144	0.873604
	DAS43	H	10	PGW	TRCN0000145620			control	2.592e+07	24172000	25519760	13419520	5871000	13097360	24845880	10795960	0.434517	16415928	0.827137
	DAS44	H	9	PGW	TRCN0000145620			control	2.784e+07	27630400	26230800	14902320	14703720	14351960	26930600	1.46527e+07	0.54409	19563840	0.95723
	DAS44	H	10	PGW	TRCN0000145620			control	2.784e+07	26079160	24844560	18642640	16493760	11369880	25461860	1.55021e+07	0.608836	19486000	0.953422
	DAS45	H	9	PGW	TRCN0000145620			control	1.3728e+08	30336320	33307000	22039120	35975480	19428080	31821660	2.58142e+07	0.811216	28217200	1.43587
	DAS45	H	10	PGW	TRCN0000145620			control	1.3152e+08	30073880	32644320	23741440	34395360	23274960	31359100	2.71373e+07	0.865371	28825992	1.46684
	DAS36	A	8		TRCN0000000000			no virus	0	20779440	27048680	125160	103960	112440	23914060	113853	0.00476094
	DAS36	A	9		TRCN0000000000			no virus	0	21627640	26459040	122280	105840	106800	24043340	111640	0.00464328
	DAS36	H	5		TRCN0000000000			no virus	0	23591760	26834320	149760	134160	143520	25213040	142480	0.00565104
	DAS36	H	6		TRCN0000000000			no virus	0	23601960	26764240	140520	120080	133000	25183100	131200	0.00520984
	DAS36	H	8		TRCN0000000000			no virus	0	22960040	26961000	169720	155280	164520	24960520	163173	0.00653726
	DAS36	H	11		TRCN0000000000			no virus	0	22259320	25409560	137160	127960	141680	23834440	135600	0.00568925
	DAS36	H	12		TRCN0000000000			no virus	0	21295840	24756440	87000	72920	84160	23026140	81360	0.00353338
	DAS37	C	2		TRCN0000000000			no virus	960000	24610480	25274360	129880	226560	201040	24942420	185827	0.00745023
	DAS37	C	11		TRCN0000000000			no virus	0	27499240	28845880	132200	237080	197960	28172560	189080	0.0067115
	DAS37	E	5		TRCN0000000000			no virus	960000	25302320	25785680	146920	266640	228800	25544000	214120	0.0083824
	DAS37	E	11		TRCN0000000000			no virus	0	27525000	29472280	129520	229440	191360	28498640	183440	0.0064368
	DAS37	G	2		TRCN0000000000			no virus	0	25065800	26805440	159400	242600	218560	25935620	206853	0.00797565
	DAS37	G	4		TRCN0000000000			no virus	0	25940520	28406080	179160	291920	248120	27173300	239733	0.00882239
	DAS37	H	11		TRCN0000000000			no virus	0	26954800	27282160	110880	175320	164520	27118480	150240	0.00554013
	DAS37	H	12		TRCN0000000000			no virus	0	26111120	26691920	75240	99920	179440	26401520	118200	0.00447701
	DAS38	A	5		TRCN0000000000			no virus	0	27035640	29281440	174920	140400	115440	28158540	143587	0.00509922
	DAS38	E	8		TRCN0000000000			no virus	0	26842840	30250080	254880	187200	144920	28546460	195667	0.00685432
	DAS38	F	11		TRCN0000000000			no virus	0	28158800	29764360	204360	133440	120000	28961580	152600	0.00526905
	DAS38	G	6		TRCN0000000000			no virus	0	29326200	29493640	200640	170760	150560	29409920	173987	0.00591592
	DAS38	H	2		TRCN0000000000			no virus	0	25854560	27278120	188000	148600	144520	26566340	160373	0.00603671
	DAS38	H	11		TRCN0000000000			no virus	0	25833040	26638760	126960	101640	99560	26235900	109387	0.00416935
	DAS38	H	12		TRCN0000000000			no virus	0	25574800	25216360	94120	66800	69120	25395580	76680	0.00301942
	DAS39	B	7		TRCN0000000000			no virus	0	20730640	22710760	136480	144080	109960	21720700	130173	0.00599305
	DAS39	D	6		TRCN0000000000			no virus	0	22646080	24287040	148360	146480	116760	23466560	137200	0.00584662
	DAS39	E	9		TRCN0000000000			no virus	0	21841400	23846920	160680	159040	127880	22844160	149200	0.00653121
	DAS39	F	3		TRCN0000000000			no virus	0	21292080	23751840	135160	129240	109560	22521960	124653	0.00553475
	DAS39	G	6		TRCN0000000000			no virus	0	21963480	23176880	188560	180080	150760	22570180	173133	0.00767089
	DAS39	H	11		TRCN0000000000			no virus	0	19492280	20614680	99880	86120	73760	20053480	86586.7	0.00431779
	DAS39	H	12		TRCN0000000000			no virus	0	18422480	19974920	80840	77240	65080	19198700	74386.7	0.00387457
	DAS40	B	9		TRCN0000000000			no virus	0	23268360	26095080	127560	124680	149640	24681720	133960	0.0054275
	DAS40	C	2		TRCN0000000000			no virus	0	24147720	24863200	140080	125800	132240	24505460	132707	0.00541539
	DAS40	D	10		TRCN0000000000			no virus	0	23906320	25975800	130280	136120	136880	24941060	134427	0.00538977
	DAS40	E	2		TRCN0000000000			no virus	0	23039200	25474560	165120	167120	157560	24256880	163267	0.00673074
	DAS40	F	3		TRCN0000000000			no virus	0	22982200	25209680	156720	172040	160720	24095940	163160	0.00677127
	DAS40	H	11		TRCN0000000000			no virus	0	21265680	22232000	100080	89960	86920	21748840	92320	0.00424482
	DAS40	H	12		TRCN0000000000			no virus	0	18852880	21171560	58880	58440	61200	20012220	59506.7	0.00297352
	DAS41	A	7		TRCN0000000000			no virus	0	29830880	30435800	133360	123080	122040	30133340	126160	0.00418672
	DAS41	B	1		TRCN0000000000			no virus	0	25388040	25785280	152680	157520	149560	25586660	153253	0.00598958
	DAS41	D	4		TRCN0000000000			no virus	0	26149400	26388560	174240	164200	157960	26268980	165467	0.00629894
	DAS41	F	7		TRCN0000000000			no virus	0	28679360	27564520	207400	194080	184600	28121940	195360	0.00694689
	DAS41	G	4		TRCN0000000000			no virus	0	24871320	25028240	229520	202520	216640	24949780	216227	0.00866648
	DAS41	G	9		TRCN0000000000			no virus	0	27765040	26962560	212760	178440	175320	27363800	188840	0.00690109
	DAS41	H	8		TRCN0000000000			no virus	0	26548080	25626160	202800	175280	181480	26087120	186520	0.00714989
	DAS41	H	11		TRCN0000000000			no virus	0	27248800	24670200	149840	126480	124520	25959500	133613	0.00514699
	DAS41	H	12		TRCN0000000000			no virus	0	25941800	24042320	101040	92160	95040	24992060	96080	0.00384442
	DAS42	A	4		TRCN0000000000			no virus	0	27986560	28274000	101760	138960	96960	28130280	112560	0.00400138
	DAS42	C	3		TRCN0000000000			no virus	0	29490320	29140000	190520	252520	185600	29315160	209547	0.00714806
	DAS42	C	12		TRCN0000000000			no virus	0	29335960	29296720	150080	186800	121680	29316340	152853	0.00521393
	DAS42	F	4		TRCN0000000000			no virus	0	30067200	29427840	215360	288520	203840	29747520	235907	0.0079303
	DAS42	G	3		TRCN0000000000			no virus	0	30100360	28497880	212240	282880	202080	29299120	232400	0.00793198
	DAS42	H	11		TRCN0000000000			no virus	0	28647320	28148800	174280	228480	172240	28398060	191667	0.00674929
	DAS42	H	12		TRCN0000000000			no virus	0	26373440	26179480	123600	160960	114600	26276460	133053	0.00506359
	DAS43	A	1		TRCN0000000000			no virus	960000	21148120	21785880	101440	54960	147080	21467000	101160	0.00471235
	DAS43	C	11		TRCN0000000000			no virus	0	26357400	26746280	571320	188920	229040	26551840	329760	0.0124195
	DAS43	D	3		TRCN0000000000			no virus	0	26041400	28846680	282760	321600	374200	27444040	326187	0.0118855
	DAS43	E	1		TRCN0000000000			no virus	0	24457920	25713520	1383840	67840	1008160	25085720	819947	0.0326858
	DAS43	E	2		TRCN0000000000			no virus	960000	25661920	26646320	224640	131840	259280	26154120	205253	0.00784784
	DAS43	E	3		TRCN0000000000			no virus	1920000	26243400	28242920	158160	73440	151880	27243160	127827	0.00469206
	DAS43	E	6		TRCN0000000000			no virus	0	27641840	31578560	416960	679760	1147880	29610200	748200	0.0252683
	DAS43	E	11		TRCN0000000000			no virus	0	25342400	27832840	116400	132960	696640	26587620	315333	0.0118602
	DAS43	H	11		TRCN0000000000			no virus	0	22403000	24993880	56920	29760	70040	23698440	52240	0.00220436
	DAS43	H	12		TRCN0000000000			no virus	0	20676800	22958160	27680	16280	40320	21817480	28093.3	0.00128765
	DAS44	B	8		TRCN0000000000			no virus	0	27810800	28921000	160880	159480	107880	28365900	142747	0.00503233
	DAS44	C	1		TRCN0000000000			no virus	0	28947800	27437560	145160	143920	103800	28192680	130960	0.00464518
	DAS44	C	11		TRCN0000000000			no virus	0	29046680	29023600	17980720	17170760	12680160	29035140	15943880	0.549124
	DAS44	D	7		TRCN0000000000			no virus	0	33048880	32855840	215000	210560	148840	32952360	191467	0.00581041
	DAS44	F	1		TRCN0000000000			no virus	0	28493600	27438040	116240	108600	96360	27965820	107067	0.00382848
	DAS44	H	11		TRCN0000000000			no virus	0	25015520	25114360	125040	110760	91720	25064940	109173	0.00435562
	DAS44	H	12		TRCN0000000000			no virus	0	23313120	23879080	77400	65200	58400	23596100	67000	0.00283945
	DAS45	D	6		TRCN0000000000			no virus	7.008e+07	33344840	34012680	253680	311480	219880	33678760	261680	0.00776988
	DAS45	D	12		TRCN0000000000			no virus	69120000	29244560	32919280	148880	206480	135840	31081920	163733	0.0052678
	DAS45	E	2		TRCN0000000000			no virus	5.28e+07	30738920	33725960	154480	217120	138800	32232440	170133	0.00527833
	DAS45	E	3		TRCN0000000000			no virus	30720000	29598920	33276960	158320	205760	136160	31437940	166747	0.00530399
	DAS45	E	8		TRCN0000000000			no virus	3.36e+07	31700320	34669200	747000	802840	375240	33184760	641693	0.019337
	DAS45	H	11		TRCN0000000000			no virus	0	29105840	32211160	134960	184600	136760	30658500	152107	0.00496132
	DAS45	H	12		TRCN0000000000			no virus	0	27342360	29273760	106520	131280	100480	28308060	112760	0.00398332
