# Supplementary material for: Functional genomic screening reveals asparagine dependence as a metabolic vulnerability in sarcoma
Source: eLife. 2015 Oct 24;4:e09436. doi: 10.7554/eLife.09436 (PMC4695385; doi:10.7554/eLife.09436)
Supplement: Supplementary file 2. — DOI: http://dx.doi.org/10.7554/eLife.09436.015 [file elife-09436-supp2.xlsx]

## Sheet: Sheet1
	Supplementary file 2: Kras; p16p19null non-myogenic sarcoma cell line Sca1-01: raw data from shRNA screen (plates DAS36-DAS45).
	Plate ID	Row	Col	Clone Name	Clone ID	Symbol	NCBI Gene ID	Taxon ID	Viral Particles/mL	(-) Puro	(-) Puro	(+) Puro	(+) Puro	Average(-)	Average (+)	C.C.	Average	% of control
	DAS43	H	5	NM_033360.2-269s1c1	TRCN0000033263	KRAS	3845	9606	61440000	957040	3932200	462720	352640	2444620	407680	0.166766	1426150	0.147309
	DAS43	F	4	NM_033360.2-407s1c1	TRCN0000033260	KRAS	3845	9606	8.736e+07	1825400	6067880	963040	1174200	3946640	1068620	0.270767	2507630	0.259016
	DAS43	G	3	NM_033360.2-509s1c1	TRCN0000033262	KRAS	3845	9606	1.104e+08	3917400	2766880	2007880	2395120	3342140	2201500	0.65871	2771820	0.286305
	DAS37	A	1	NM_009616.2-184s1c1	TRCN0000031896	Adam19	11492	10090	1.1424e+08	6464320	7624200	4683360	4315960	7044260	4499660	0.63877	5771960	0.386644
	DAS37	A	8	NM_009616.2-2297s1c1	TRCN0000031897	Adam19	11492	10090	1.3728e+08	7868040	11204320	9564280	8022280	9536180	8793280	0.922097	9164730	0.613914
	DAS37	F	4	NM_009616.2-946s1c1	TRCN0000031898	Adam19	11492	10090	1.1424e+08	13095600	11189720	9690720	9916560	12142660	9803640	0.807372	10973150	0.735054
	DAS37	E	3	NM_009616.2-3899s1c1	TRCN0000031894	Adam19	11492	10090	1.3728e+08	14434120	14217360	14183520	13558920	14325740	13871220	0.968272	14098480	0.944409
	DAS37	C	10	NM_009616.2-660s1c1	TRCN0000031895	Adam19	11492	10090	1.3728e+08	19781680	20147520	18200800	18501280	19964600	18351040	0.919179	19157820	1.28332
	DAS41	A	10	NM_007403.2-1956s21c2	TRCN0000351178	Adam8	11501	10090	8.832e+07	1245600	1614360	961800	952040	1429980	956920	0.669184	1193450	0.110054
	DAS41	G	10	NM_007403.1-2303s1c1	TRCN0000031785	Adam8	11501	10090	1.3728e+08	4181880	5152840	2242920	1793160	4667360	2018040	0.432373	3342700	0.308248
	DAS41	B	11	NM_007403.2-87s21c2	TRCN0000351250	Adam8	11501	10090	1.3728e+08	5761040	5778080	5022320	5220080	5769560	5121200	0.887624	5445380	0.502148
	DAS41	F	10	NM_007403.2-542s21c3	TRCN0000334452	Adam8	11501	10090	1.3728e+08	6715400	5950200	6135800	4572440	6332800	5354120	0.845459	5843460	0.538857
	DAS41	G	8	NM_007403.2-1151s21c1	TRCN0000331920	Adam8	11501	10090	1.3728e+08	16889760	15771960	14871920	15703520	16330860	15287720	0.936125	15809290	1.45786
	DAS39	C	8	NM_026644.2-925s21c1	TRCN0000250472	Agpat4	68262	10090	1.3728e+08	22089000	9777400	4874280	11668960	15933200	8271620	0.519144	12102410	0.696885
	DAS39	H	6	NM_026644.2-871s21c1	TRCN0000250468	Agpat4	68262	10090	15360000	19509520	18402880	14374000	14903520	18956200	14638760	0.772241	16797480	0.967238
	DAS39	B	12	NM_026644.2-614s21c1	TRCN0000250471	Agpat4	68262	10090	26880000	20989160	19662640	22363000	20416720	20325900	21389860	1.05235	20857880	1.20105
	DAS39	A	12	NM_026644.2-1549s21c1	TRCN0000250470	Agpat4	68262	10090	1.3728e+08	25676960	21080200	16165680	25845000	23378580	21005340	0.898487	22191960	1.27786
	DAS39	B	9	NM_026644.2-833s21c1	TRCN0000250469	Agpat4	68262	10090	1.3728e+08	26691040	26478000	23789840	27722280	26584520	25756060	0.968837	26170290	1.50695
	DAS45	F	3	NM_009655.2-2055s21c1	TRCN0000377057	Alcam	11658	10090	1.3728e+08	7518120	5386680	3149000	3650520	6452400	3399760	0.526899	4926080	0.577755
	DAS45	B	9	NM_009655.2-1859s21c1	TRCN0000327357	Alcam	11658	10090	1.3728e+08	3995560	8147320	2118080	6804480	6071440	4461280	0.734798	5266360	0.617665
	DAS45	A	4	NM_009655.1-2767s1c1	TRCN0000094212	Alcam	11658	10090	9.792e+07	9298840	10618000	7199240	8717200	9958420	7958220	0.799145	8958320	1.05068
	DAS45	A	5	NM_009655.1-3419s1c1	TRCN0000094209	Alcam	11658	10090	9.984e+07	14369760	15609960	12214240	15218800	14989860	13716520	0.915053	14353190	1.68341
	DAS45	G	7	NM_009655.1-2312s1c1	TRCN0000094210	Alcam	11658	10090	15360000	16801520	15838760	16004960	14563920	16320140	15284440	0.936539	15802290	1.85337
	DAS38	A	6	NM_177305.4-1234s21c1	TRCN0000348086	Arl4c	320982	10090	1.3728e+08	10826160	10528920	6106400	10470120	10677540	8288260	0.776233	9482900	0.531448
	DAS38	D	12	NM_177305.4-1049s21c1	TRCN0000334004	Arl4c	320982	10090	1.3728e+08	11953600	13711280	13664080	13499000	12832440	13581540	1.05838	13206990	0.740156
	DAS38	A	1	NM_177305.4-667s21c1	TRCN0000348152	Arl4c	320982	10090	1.3728e+08	19036000	21581160	20418360	19277120	20308580	19847740	0.977308	20078160	1.12524
	DAS38	E	2	NM_177305.4-1067s21c1	TRCN0000374665	Arl4c	320982	10090	1.3728e+08	18177960	20838840	20290960	21950600	19508400	21120780	1.08265	20314590	1.13849
	DAS38	C	11	NM_177305.4-1208s21c1	TRCN0000380301	Arl4c	320982	10090	1.3728e+08	23219800	24701000	26463200	28663480	23960400	27563340	1.15037	25761870	1.44377
	DAS44	F	2	NM_026139.2-3321s1c1	TRCN0000125849	Armcx2	67416	10090	1.3728e+08	6394760	8145320	5173480	5186000	7270040	5179740	0.712478	6224890	0.538018
	DAS44	G	6	NM_026139.3-869s21c1	TRCN0000312294	Armcx2	67416	10090	2.016e+07	12064080	7691400	6857640	7552320	9877740	7204980	0.729416	8541360	0.738231
	DAS44	C	9	NM_026139.3-1117s21c1	TRCN0000312295	Armcx2	67416	10090	3.36e+07	10592840	13317200	10773320	12107000	11955020	11440160	0.956934	11697590	1.01102
	DAS44	B	2	NM_026139.2-2976s1c1	TRCN0000125852	Armcx2	67416	10090	61440000	17074200	18544760	17517760	16550600	17809480	17034180	0.956467	17421830	1.50577
	DAS44	H	1	NM_026139.2-2919s1c1	TRCN0000125850	Armcx2	67416	10090	9.6e+07	17580880	19528680	17269040	17831360	18554780	17550200	0.945859	18052490	1.56028
	DAS41	A	8	NM_012055.1-821s1c1	TRCN0000031703	Asns	27053	10090	1.3728e+08	585720	724680	348040	395680	655200	371860	0.567552	513530	0.0473554
	DAS41	D	6	NM_012055.3-787s21c1	TRCN0000324779	Asns	27053	10090	1.3728e+08	954160	983720	218760	251080	968940	234920	0.242451	601930	0.0555072
	DAS41	B	9	NM_012055.1-1397s1c1	TRCN0000031700	Asns	27053	10090	1.3728e+08	638560	1033360	561200	527960	835960	544580	0.651443	690270	0.0636535
	DAS41	A	5	NM_012055.1-299s1c1	TRCN0000031701	Asns	27053	10090	1.3728e+08	1451040	690720	426080	496680	1070880	461380	0.430842	766130	0.0706489
	DAS41	F	9	NM_012055.1-1603s1c1	TRCN0000031702	Asns	27053	10090	1.2864e+08	2038640	1862400	202360	125960	1950520	164160	0.0841622	1057340	0.097503
	DAS36	F	2	NM_027395.1-55s21c1	TRCN0000250262	Basp1	70350	10090	1.3728e+08	2996520	4478760	3500880	3779280	3737640	3640080	0.973898	3688860	0.22462
	DAS36	D	3	NM_027395.1-51s1c1	TRCN0000202255	Basp1	70350	10090	4.704e+07	9450800	6772400	7530080	5805320	8111600	6667700	0.821996	7389650	0.449966
	DAS36	F	11	NM_027395.1-47s21c1	TRCN0000250265	Basp1	70350	10090	1.3728e+08	6212000	10518400	7889000	5657280	8365200	6773140	0.809681	7569170	0.460897
	DAS36	F	3	NM_027395.1-495s21c1	TRCN0000250266	Basp1	70350	10090	1.3056e+08	9003680	13958400	8277160	10253400	11481040	9265280	0.807007	10373160	0.631636
	DAS36	D	1	NM_027395.1-33s21c1	TRCN0000250263	Basp1	70350	10090	9.216e+07	14008000	14066920	12222600	10592240	14037460	11407420	0.812641	12722440	0.774687
	DAS40	D	8	NM_013815.2-534s21c1	TRCN0000244323	Baz1a	217578	10090	6.624e+07	1021880	4684720	1147840	1077560	2853300	1112700	0.38997	1983000	0.183386
	DAS40	D	12	NM_013815.2-752s21c1	TRCN0000241701	Baz1a	217578	10090	1.3056e+08	1808080	5773520	2597160	2767200	3790800	2682180	0.70755	3236490	0.299308
	DAS40	B	2	NM_013815.2-1102s21c1	TRCN0000241700	Baz1a	217578	10090	1.008e+08	4918720	11929200	6925760	5460760	8423960	6193260	0.735196	7308610	0.675895
	DAS40	F	10	NM_013815.2-5818s21c1	TRCN0000241702	Baz1a	217578	10090	1.3728e+08	8567240	10814400	10380400	8116560	9690820	9248480	0.954355	9469650	0.875747
	DAS40	E	7	NM_013815.2-2752s21c1	TRCN0000244322	Baz1a	217578	10090	1.008e+08	8649560	14013800	9344520	6783600	11331680	8064060	0.711639	9697870	0.896852
	DAS39	F	5	NM_007532.5-463s21c1	TRCN0000317184	Bcat1	12035	10090	7.872e+07	7223640	3660280	243840	1003120	5441960	623480	0.114569	3032720	0.174631
	DAS39	A	10	NM_007532.2-533s1c1	TRCN0000103176	Bcat1	12035	10090	1.008e+08	15335880	7153040	3920240	8906000	11244460	6413120	0.570336	8828790	0.508382
	DAS39	C	6	NM_007532.2-727s1c1	TRCN0000103178	Bcat1	12035	10090	1.0368e+08	23673640	13288920	3278640	8504160	18481280	5891400	0.318777	12186340	0.701718
	DAS39	B	4	NM_007532.2-2145s1c1	TRCN0000103175	Bcat1	12035	10090	1.3728e+08	22209360	18696840	12461800	19410960	20453100	15936380	0.779167	18194740	1.0477
	DAS39	G	7	NM_007532.2-1245s1c1	TRCN0000103177	Bcat1	12035	10090	1.3728e+08	23761200	21234680	17261120	20949640	22497940	19105380	0.849206	20801660	1.19781
	DAS36	C	5	NM_007569.1-499s1c1	TRCN0000055298	Btg1	12226	10090	9.312e+07	2684840	5222560	2172080	1718800	3953700	1945440	0.492056	2949570	0.179603
	DAS36	A	12	NM_007569.2-590s21c1	TRCN0000310861	Btg1	12226	10090	1.3728e+08	10642560	7696840	7097960	5709440	9169700	6403700	0.698354	7786700	0.474143
	DAS36	G	11	NM_007569.2-1138s21c1	TRCN0000304263	Btg1	12226	10090	1.3728e+08	10114600	14535920	12884560	11373800	12325260	12129180	0.984091	12227220	0.744533
	DAS36	H	7	NM_007569.1-351s1c1	TRCN0000055300	Btg1	12226	10090	1.3344e+08	13182840	13899680	13796760	15505760	13541260	14651260	1.08197	14096260	0.858341
	DAS36	F	8	NM_007569.2-738s21c1	TRCN0000304264	Btg1	12226	10090	1.3728e+08	17008000	21234360	20975960	21229920	19121180	21102940	1.10364	20112060	1.22465
	DAS39	D	3	NM_027994.1-953s21c1	TRCN0000239085	Cand1	71902	10090	1.3728e+08	10636760	4240440	2290200	3872160	7438600	3081180	0.414215	5259890	0.302877
	DAS39	G	1	NM_027994.1-2099s21c1	TRCN0000239083	Cand1	71902	10090	1.3728e+08	11507800	10710400	1538120	3316440	11109100	2427280	0.218495	6768190	0.389728
	DAS39	B	2	NM_027994.1-2057s21c1	TRCN0000218736	Cand1	71902	10090	1.3728e+08	19049680	10172360	3058360	10163080	14611020	6610720	0.452448	10610870	0.610998
	DAS39	C	9	NM_027994.1-3248s21c1	TRCN0000239084	Cand1	71902	10090	1.3728e+08	15099880	11917520	8691920	13478640	13508700	11085280	0.820603	12296990	0.708089
	DAS39	B	1	NM_027994.1-4819s21c1	TRCN0000239082	Cand1	71902	10090	1.1328e+08	15355160	14116560	9727920	13871800	14735860	11799860	0.800758	13267860	0.763994
	DAS43	F	8	NM_007599.1-883s1c1	TRCN0000091421	Capg	12332	10090	1.152e+08	2268760	3285200	1864880	1780800	2776980	1822840	0.656411	2299910	0.23756
	DAS43	G	12	NM_007599.1-1242s1c1	TRCN0000091419	Capg	12332	10090	8.64e+07	935000	3626800	2224000	2660360	2280900	2442180	1.07071	2361540	0.243926
	DAS43	G	5	NM_007599.3-180s21c1	TRCN0000318307	Capg	12332	10090	1.1808e+08	3546680	4873720	3061600	2276200	4210200	2668900	0.633913	3439550	0.355275
	DAS43	E	8	NM_007599.3-1055s21c1	TRCN0000318310	Capg	12332	10090	9.312e+07	5046040	6456000	3146240	2986600	5751020	3066420	0.533196	4408720	0.455382
	DAS43	G	10	NM_007599.1-1008s1c1	TRCN0000091422	Capg	12332	10090	9.312e+07	8672560	11753760	6334920	11502720	10213160	8918820	0.873267	9565990	0.988082
	DAS37	C	9	NM_025779.3-426s21c1	TRCN0000340568	Ccdc109b	66815	10090	1.3728e+08	3808600	7434240	3066440	2885320	5621420	2975880	0.529382	4298650	0.287952
	DAS37	G	12	NM_025779.2-1205s1c1	TRCN0000193898	Ccdc109b	66815	10090	1.3728e+08	4998320	6959560	5436280	5065600	5978940	5250940	0.878239	5614940	0.376126
	DAS37	H	2	NM_025779.3-653s21c1	TRCN0000340489	Ccdc109b	66815	10090	107520000	9635920	8802640	8375720	8385920	9219280	8380820	0.909054	8800050	0.589485
	DAS37	A	10	NM_025779.2-566s1c1	TRCN0000174454	Ccdc109b	66815	10090	1.3728e+08	15570640	17195280	16188960	14917760	16382960	15553360	0.949362	15968160	1.06965
	DAS37	H	1	NM_025779.3-572s21c1	TRCN0000340490	Ccdc109b	66815	10090	1.3728e+08	20044240	19611080	20262720	18654200	19827660	19458460	0.98138	19643060	1.31582
	DAS38	A	8	NM_009828.1-614s1c1	TRCN0000077766	Ccna2	12428	10090	1.3728e+08	10428040	12958960	9136720	10432640	11693500	9784680	0.836762	10739090	0.601848
	DAS38	D	2	NM_009828.1-890s1c1	TRCN0000077767	Ccna2	12428	10090	1.3728e+08	13467240	18187560	7322920	6369560	15827400	6846240	0.432556	11336820	0.635347
	DAS38	C	9	NM_009828.1-626s1c1	TRCN0000077764	Ccna2	12428	10090	1.3728e+08	16277600	19745840	18053040	12819440	18011720	15436240	0.857011	16723980	0.937258
	DAS38	B	12	NM_009828.1-1617s1c1	TRCN0000077763	Ccna2	12428	10090	1.3728e+08	19749000	22507880	23729680	19696280	21128440	21712980	1.02767	21420710	1.20048
	DAS38	C	10	NM_009828.1-1314s1c1	TRCN0000077765	Ccna2	12428	10090	1.3728e+08	24839800	26801200	28783160	29839880	25820500	29311520	1.1352	27566010	1.54488
	DAS36	F	6	NM_007631.2-801s21c1	TRCN0000312946	Ccnd1	12443	10090	8.256e+07	5189280	9068240	4679520	6618800	7128760	5649160	0.792446	6388960	0.389033
	DAS36	G	6	NM_007631.2-925s21c1	TRCN0000311853	Ccnd1	12443	10090	1.3728e+08	8007480	10660080	7470600	9634720	9333780	8552660	0.916313	8943220	0.544565
	DAS36	A	10	NM_007631.2-606s21c1	TRCN0000312873	Ccnd1	12443	10090	1.3728e+08	10871560	11785920	13527960	11779920	11328740	12653940	1.11698	11991340	0.73017
	DAS36	B	10	NM_007631.2-1443s21c1	TRCN0000312881	Ccnd1	12443	10090	1.1136e+08	12561920	14753880	10869240	14305800	13657900	12587520	0.921629	13122710	0.79906
	DAS36	E	10	NM_007631.1-879s1c1	TRCN0000026910	Ccnd1	12443	10090	1.3728e+08	12366480	19185320	18822040	18432440	15775900	18627240	1.18074	17201570	1.04743
	DAS45	A	9	NM_023223.1-296s1c1	TRCN0000027679	Cdc20	107995	10090	76800000	535120	1100520	217600	305400	817820	261500	0.319753	539660	0.063294
	DAS45	E	5	NM_023223.2-1041s21c1	TRCN0000280171	Cdc20	107995	10090	1.3728e+08	2210000	1317520	884200	2637520	1763760	1760860	0.998356	1762310	0.206693
	DAS45	E	9	NM_023223.2-766s21c1	TRCN0000297357	Cdc20	107995	10090	1.3728e+08	5376320	4434840	3742560	5543880	4905580	4643220	0.946518	4774400	0.559966
	DAS45	F	9	NM_023223.1-894s1c1	TRCN0000027706	Cdc20	107995	10090	1.3728e+08	4750280	5967400	4325120	4762160	5358840	4543640	0.847878	4951240	0.580706
	DAS45	F	5	NM_023223.1-1352s1c1	TRCN0000027730	Cdc20	107995	10090	1.3728e+08	9268840	7527080	6547920	7752600	8397960	7150260	0.851428	7774110	0.911787
	DAS45	F	8	NM_028023.3-1027s1c1	TRCN0000180955	Cdca4	71963	10090	9.504e+07	1250000	1105560	767600	1337400	1177780	1052500	0.89363	1115140	0.130789
	DAS45	G	8	NM_028023.3-1082s1c1	TRCN0000196081	Cdca4	71963	10090	9.792e+07	4837040	3368160	1919760	2199760	4102600	2059760	0.502062	3081180	0.361376
	DAS45	B	3	NM_028023.3-794s21c1	TRCN0000279292	Cdca4	71963	10090	1.3728e+08	4441120	5587880	2357000	4270160	5014500	3313580	0.6608	4164040	0.48838
	DAS45	E	7	NM_028023.3-830s21c1	TRCN0000375945	Cdca4	71963	10090	1.3728e+08	5533960	4777440	3491640	7524600	5155700	5508120	1.06836	5331910	0.625353
	DAS45	H	8	NM_028023.3-1879s1c1	TRCN0000184592	Cdca4	71963	10090	5.28e+07	6694320	7052960	10188760	8798720	6873640	9493740	1.38118	8183690	0.959824
	DAS43	E	9	NM_009866.4-2149s21c1	TRCN0000329524	Cdh11	12552	10090	61440000	1167240	2225560	525480	1311880	1696400	918680	0.541547	1307540	0.135057
	DAS43	G	11	NM_009866.4-2593s21c1	TRCN0000329454	Cdh11	12552	10090	1.056e+08	4709920	8219480	6100480	4845320	6464700	5472900	0.846582	5968800	0.616524
	DAS43	A	2	NM_009866.3-3338s1c1	TRCN0000094829	Cdh11	12552	10090	7.008e+07	5650760	7185960	6975080	6480680	6418360	6727880	1.04822	6573120	0.678945
	DAS43	G	1	NM_009866.4-2260s21c1	TRCN0000329455	Cdh11	12552	10090	1.3728e+08	4455040	9676400	6149440	8026680	7065720	7088060	1.00316	7076890	0.73098
	DAS43	B	4	NM_009866.4-3295s21c1	TRCN0000329523	Cdh11	12552	10090	1.3728e+08	7398400	10525160	9671120	12210040	8961780	10940580	1.2208	9951180	1.02787
	DAS37	A	9	NM_007664.1-1047s1c1	TRCN0000094857	Cdh2	12558	10090	1.3728e+08	6243520	9189960	6630520	5305280	7716740	5967900	0.773371	6842320	0.458344
	DAS37	H	4	NM_007664.4-949s21c1	TRCN0000363547	Cdh2	12558	10090	1.3728e+08	12583360	12698640	13289880	12014640	12641000	12652260	1.00089	12646630	0.847155
	DAS37	D	11	NM_007664.4-3410s21c1	TRCN0000375419	Cdh2	12558	10090	1.3728e+08	15612400	14879160	13826080	13604560	15245780	13715320	0.899614	14480550	0.970003
	DAS37	H	3	NM_007664.1-2975s1c1	TRCN0000094858	Cdh2	12558	10090	1.3728e+08	14992240	15920640	14606800	16015680	15456440	15311240	0.990606	15383840	1.03051
	DAS37	F	11	NM_007664.4-1805s21c1	TRCN0000327315	Cdh2	12558	10090	1.3728e+08	17756120	17993880	18795480	17485680	17875000	18140580	1.01486	18007790	1.20628
	DAS45	B	11	NM_009871.2-1295s1c1	TRCN0000009518	Cdk5r1	12569	10090	1.2864e+08	3009000	2664800	970880	1432920	2836900	1201900	0.423667	2019400	0.236845
	DAS45	B	7	NM_009871.2-1990s1c1	TRCN0000009515	Cdk5r1	12569	10090	1.3728e+08	2741920	4817200	2487200	4696240	3779560	3591720	0.950301	3685640	0.43227
	DAS45	G	4	NM_009871.2-1668s21c1	TRCN0000418778	Cdk5r1	12569	10090	1.3728e+08	5336880	5273280	4728600	5714360	5305080	5221480	0.984242	5263280	0.617304
	DAS45	E	4	NM_009871.2-1044s21c1	TRCN0000434115	Cdk5r1	12569	10090	1.3728e+08	9085880	6998400	4632640	6287120	8042140	5459880	0.678909	6751010	0.791792
	DAS45	C	1	NM_009871.2-1240s1c1	TRCN0000009517	Cdk5r1	12569	10090	3.36e+07	10381080	12111560	10990240	11005720	11246320	10997980	0.977918	11122150	1.30446
	DAS38	G	2	NM_009873.1-873s1c1	TRCN0000023151	Cdk6	12571	10090	1.3728e+08	8824800	9537560	9572880	8430800	9181180	9001840	0.980467	9091510	0.509513
	DAS38	F	8	NM_009873.1-670s1c1	TRCN0000023150	Cdk6	12571	10090	1.3728e+08	8843200	11434880	10693080	9792160	10139040	10242620	1.01022	10190830	0.571122
	DAS38	E	7	NM_009873.1-830s1c1	TRCN0000023153	Cdk6	12571	10090	1.3728e+08	9747120	10511080	11217960	10033160	10129100	10625560	1.04901	10377330	0.581574
	DAS38	B	9	NM_009873.1-895s1c1	TRCN0000023149	Cdk6	12571	10090	1.3728e+08	11824600	11695960	8447040	10084920	11760280	9265980	0.787905	10513130	0.589185
	DAS38	F	4	NM_009873.1-367s1c1	TRCN0000023152	Cdk6	12571	10090	15360000	21217640	23430280	19712360	21683200	22323960	20697780	0.927155	21510870	1.20553
	DAS45	C	10	NM_026014.3-860s21c1	TRCN0000276769	Cdt1	67177	10090	1.3728e+08	1022920	2899680	1134800	1424040	1961300	1279420	0.652333	1620360	0.190044
	DAS45	D	8	NM_026014.3-364s1c1	TRCN0000174013	Cdt1	67177	10090	1.3728e+08	3419640	1504480	1644600	2522240	2462060	2083420	0.84621	2272740	0.266558
	DAS45	C	8	NM_026014.3-1750s21c1	TRCN0000276816	Cdt1	67177	10090	1.3728e+08	4927480	4047400	1877200	6709760	4487440	4293480	0.956777	4390460	0.514935
	DAS45	D	4	NM_026014.3-1337s21c1	TRCN0000276817	Cdt1	67177	10090	1.3728e+08	4687840	7463040	2986120	6200280	6075440	4593200	0.756028	5334320	0.625636
	DAS45	D	11	NM_026014.3-714s1c1	TRCN0000173872	Cdt1	67177	10090	3.648e+07	7856160	6534240	4046120	4529760	7195200	4287940	0.595945	5741570	0.6734
	DAS43	D	7	NM_007681.1-226s1c1	TRCN0000093127	Cenpa	12615	10090	6.048e+07	2675680	3307800	2476920	2838080	2991740	2657500	0.888279	2824620	0.291758
	DAS43	G	2	NM_007681.1-484s1c1	TRCN0000093125	Cenpa	12615	10090	1.3728e+08	1464360	7272480	1898760	1665520	4368420	1782140	0.40796	3075280	0.317649
	DAS43	E	5	NM_007681.1-934s1c1	TRCN0000093123	Cenpa	12615	10090	1.152e+08	3383920	5122600	2992200	2312880	4253260	2652540	0.623649	3452900	0.356654
	DAS43	H	8	NM_007681.1-312s1c1	TRCN0000093124	Cenpa	12615	10090	2.784e+07	4540640	6717880	2348440	1797680	5629260	2073060	0.368265	3851160	0.397791
	DAS43	A	11	NM_007681.1-233s1c1	TRCN0000093126	Cenpa	12615	10090	7.008e+07	7062720	9025720	8790880	10806840	8044220	9798860	1.21812	8921540	0.921516
	DAS44	C	6	NM_173762.4-7623s21c1	TRCN0000294860	Cenpe	229841	10090	1.3728e+08	1481360	2222560	2472600	1907040	1851960	2189820	1.18243	2020890	0.174666
	DAS44	E	6	NM_173762.3-4827s1c1	TRCN0000089925	Cenpe	229841	10090	9.792e+07	3311640	2359120	2301920	1761960	2835380	2031940	0.716638	2433660	0.210342
	DAS44	B	9	NM_173762.4-3060s21c1	TRCN0000294792	Cenpe	229841	10090	1.3728e+08	2041760	4478400	1864520	1632640	3260080	1748580	0.536361	2504330	0.21645
	DAS44	B	7	NM_173762.4-1505s21c1	TRCN0000287430	Cenpe	229841	10090	1.008e+08	5151320	6960440	7430000	8217440	6055880	7823720	1.29192	6939800	0.599808
	DAS44	A	8	NM_173762.3-3120s1c1	TRCN0000089926	Cenpe	229841	10090	9.312e+07	8414440	11097840	7312360	9922040	9756140	8617200	0.883259	9186670	0.794005
	DAS40	C	6	NM_028760.2-2066s21c1	TRCN0000375943	Cep55	74107	10090	1.1904e+08	3720360	5664240	4572720	2991640	4692300	3782180	0.80604	4237240	0.391857
	DAS40	B	5	NM_028760.1-1146s1c1	TRCN0000183083	Cep55	74107	10090	9.792e+07	4555800	8508400	6500080	4126640	6532100	5313360	0.813423	5922730	0.54773
	DAS40	H	5	NM_028760.2-989s21c1	TRCN0000366948	Cep55	74107	10090	9.408e+07	8658000	10672360	8498760	8586680	9665180	8542720	0.883866	9103950	0.841927
	DAS40	D	5	NM_028760.2-1179s21c1	TRCN0000366894	Cep55	74107	10090	1.3728e+08	7686040	12252760	9232000	8572200	9969400	8902100	0.892942	9435750	0.872612
	DAS40	A	9	NM_028760.2-1774s21c1	TRCN0000375942	Cep55	74107	10090	1.1808e+08	8349720	15030880	13764840	8103600	11690300	10934220	0.935324	11312260	1.04615
	DAS41	F	8	NM_001081163.1-1241s21c1	TRCN0000252616	Chsy1	269941	10090	1.3728e+08	3054720	3818800	864800	1008320	3436760	936560	0.272512	2186660	0.201644
	DAS41	C	2	NM_001081163.1-1110s21c1	TRCN0000252619	Chsy1	269941	10090	1.3728e+08	5329240	5097000	4840160	5030840	5213120	4935500	0.946746	5074310	0.467929
	DAS41	A	4	NM_001081163.1-2636s21c1	TRCN0000252617	Chsy1	269941	10090	1.3728e+08	6330480	6033840	3254600	5391600	6182160	4323100	0.699286	5252630	0.484373
	DAS41	B	8	NM_001081163.1-3588s21c1	TRCN0000252618	Chsy1	269941	10090	1.3728e+08	13330640	10432400	12955240	13821560	11881520	13388400	1.12683	12634960	1.16514
	DAS42	D	6	NM_029295.2-395s21c1	TRCN0000327367	Cklf	75458	10090	1.3728e+08	276960	1983360	12480	1021160	1130160	516820	0.457298	823490	0.111411
	DAS42	H	4	NM_029295.2-305s21c1	TRCN0000327366	Cklf	75458	10090	1.3728e+08	54920	8891920	16800	5518040	4473420	2767420	0.618636	3620420	0.489812
	DAS42	F	1	NM_029295.2-460s21c1	TRCN0000327444	Cklf	75458	10090	122880000	47840	10183760	2120	7634600	5115800	3818360	0.746386	4467080	0.604358
	DAS42	D	1	NM_029295.1-308s1c1	TRCN0000089298	Cklf	75458	10090	30720000	455160	10726360	2200	10015560	5590760	5008880	0.895921	5299820	0.71702
	DAS42	B	9	NM_029295.2-150s21c1	TRCN0000327443	Cklf	75458	10090	9.696e+07	12131880	11512240	10241600	12837400	11822060	11539500	0.976099	11680780	1.58031
	DAS42	F	5	NM_016904.1-541s21c1	TRCN0000274752	Cks1b	54124	10090	1.3728e+08	392560	5703320	8040	4396960	3047940	2202500	0.722619	2625220	0.35517
	DAS42	D	4	NM_016904.1-160s21c1	TRCN0000274746	Cks1b	54124	10090	1.3728e+08	23400	5125840	5120	8566880	2574620	4286000	1.66471	3430310	0.464092
	DAS42	F	3	NM_016904.1-268s21c1	TRCN0000274691	Cks1b	54124	10090	1.3728e+08	44920	10144600	2560	10520760	5094760	5261660	1.03276	5178210	0.700568
	DAS42	B	6	NM_016904.1-192s1c1	TRCN0000025042	Cks1b	54124	10090	1.2192e+08	6013720	7834880	12560	6885440	6924300	3449000	0.498101	5186650	0.70171
	DAS42	G	9	NM_016904.1-126s21c1	TRCN0000274693	Cks1b	54124	10090	1.296e+08	7433840	7582320	471040	6006640	7508080	3238840	0.431381	5373460	0.726983
	DAS36	C	12	NM_025415.3-359s21c1	TRCN0000368800	Cks2	66197	10090	1.3728e+08	5800000	6393680	4800920	4600880	6096840	4700900	0.771039	5398870	0.328745
	DAS36	F	7	NM_025415.3-251s21c1	TRCN0000361763	Cks2	66197	10090	1.0272e+08	9695840	15737760	9500480	14457960	12716800	11979220	0.942	12348010	0.751888
	DAS36	G	7	NM_025415.1-162s1c1	TRCN0000025044	Cks2	66197	10090	7.296e+07	11195200	13439600	12573440	12567080	12317400	12570260	1.02053	12443830	0.757722
	DAS36	E	5	NM_025415.1-171s1c1	TRCN0000025046	Cks2	66197	10090	9.408e+07	14693000	16314840	17574200	18349280	15503920	17961740	1.15853	16732830	1.01889
	DAS36	H	2	NM_025415.1-276s1c1	TRCN0000025045	Cks2	66197	10090	9.6e+07	19093960	21781960	23822480	23763360	20437960	23792920	1.16415	22115440	1.34664
	DAS44	B	6	NM_016691.2-437s1c1	TRCN0000069497	Clcn5	12728	10090	1.1328e+08	2467320	4692600	3421680	3541400	3579960	3481540	0.972508	3530750	0.305163
	DAS44	C	8	NM_016691.2-1163s21c1	TRCN0000352262	Clcn5	12728	10090	1.3728e+08	2996000	4793000	5147680	4802160	3894500	4974920	1.27742	4434710	0.383293
	DAS44	F	12	NM_016691.2-658s21c1	TRCN0000352261	Clcn5	12728	10090	1.3728e+08	6699400	5289880	6821040	6618720	5994640	6719880	1.12098	6357260	0.549459
	DAS44	A	9	NM_016691.2-240s1c1	TRCN0000069494	Clcn5	12728	10090	7.2e+07	6331320	9431440	5206160	4919920	7881380	5063040	0.642405	6472210	0.559394
	DAS44	D	5	NM_016691.2-1748s1c1	TRCN0000069496	Clcn5	12728	10090	1.104e+08	9521160	13856400	11829560	11335960	11688780	11582760	0.99093	11635770	1.00568
	DAS36	D	5	NM_009929.3-3987s21c1	TRCN0000326517	Col18a1	12822	10090	1.1712e+08	8536120	9812400	8639800	8527000	9174260	8583400	0.935596	8878830	0.540644
	DAS36	C	8	NM_009929.2-1413s1c1	TRCN0000109538	Col18a1	12822	10090	3.744e+07	11553200	14456920	13886000	12865240	13005060	13375620	1.02849	13190340	0.803178
	DAS36	G	12	NM_009929.3-917s21c1	TRCN0000326519	Col18a1	12822	10090	1.3728e+08	15779720	19278480	15149360	16485760	17529100	15817560	0.90236	16673330	1.01526
	DAS36	B	12	NM_009929.3-4116s21c1	TRCN0000326586	Col18a1	12822	10090	1.3728e+08	15662560	17121440	17285600	18235240	16392000	17760420	1.08348	17076210	1.03979
	DAS36	A	1	NM_009929.3-1837s21c1	TRCN0000326587	Col18a1	12822	10090	1.3728e+08	17742520	20189920	17891720	19494800	18966220	18693260	0.985608	18829740	1.14657
	DAS40	D	4	NM_028071.3-482s21c1	TRCN0000277052	Cotl1	72042	10090	1.2576e+08	1653600	4429680	1227000	643560	3041640	935280	0.307492	1988460	0.183891
	DAS40	G	8	NM_028071.3-397s21c1	TRCN0000350228	Cotl1	72042	10090	1.3728e+08	3969800	5471120	2870640	2277960	4720460	2574300	0.545349	3647380	0.337307
	DAS40	H	4	NM_028071.1-266s1c1	TRCN0000184279	Cotl1	72042	10090	9.984e+07	3087760	8323600	3749880	2410480	5705680	3080180	0.539845	4392930	0.406255
	DAS40	H	7	NM_028071.3-587s21c1	TRCN0000277104	Cotl1	72042	10090	1.3248e+08	14199760	18228960	15473280	14388040	16214360	14930660	0.920829	15572510	1.44013
	DAS40	H	6	NM_028071.1-366s1c1	TRCN0000196183	Cotl1	72042	10090	7.392e+07	14563040	17964000	16129560	14464160	16263520	15296860	0.940563	15780190	1.45934
	DAS45	H	3	NM_178661.3-1320s21c1	TRCN0000301786	Creb3l2	208647	10090	1.3728e+08	1678640	2178640	825480	587880	1928640	706680	0.366414	1317660	0.154542
	DAS45	G	9	NM_178661.2-2143s1c1	TRCN0000084448	Creb3l2	208647	10090	1.0272e+08	3829960	1586160	956400	792840	2708060	874620	0.322969	1791340	0.210097
	DAS45	A	1	NM_178661.2-851s1c1	TRCN0000084449	Creb3l2	208647	10090	1.3728e+08	3321840	6622880	2684200	2421480	4972360	2552840	0.513406	3762600	0.441297
	DAS45	D	2	NM_178661.2-850s1c1	TRCN0000084451	Creb3l2	208647	10090	1.3728e+08	3859000	7666920	4346080	6220360	5762960	5283220	0.916755	5523090	0.647776
	DAS45	F	4	NM_178661.3-1838s21c1	TRCN0000301785	Creb3l2	208647	10090	1.3728e+08	14905440	13102280	11595440	13558640	14003860	12577040	0.898112	13290450	1.55877
	DAS42	A	12	NM_007792.4-369s21c1	TRCN0000304356	Csrp2	13008	10090	7.008e+07	5904480	4371160	5800	4347600	5137820	2176700	0.423662	3657260	0.494796
	DAS42	G	8	NM_007792.4-460s21c1	TRCN0000310940	Csrp2	13008	10090	1.3728e+08	7277120	7141920	57040	3535240	7209520	1796140	0.249134	4502830	0.609195
	DAS42	G	6	NM_007792.4-564s21c1	TRCN0000315999	Csrp2	13008	10090	3.36e+07	9034440	12397440	1127920	11912080	10715940	6520000	0.608439	8617970	1.16594
	DAS42	H	7	NM_007792.2-249s1c1	TRCN0000075455	Csrp2	13008	10090	4.416e+07	11467520	8208120	7975720	7621720	9837820	7798720	0.792728	8818270	1.19304
	DAS42	G	11	NM_007792.4-680s21c1	TRCN0000315921	Csrp2	13008	10090	1.1232e+08	13804320	13000640	1097760	14987000	13402480	8042380	0.600067	10722430	1.45065
	DAS41	C	1	NM_007803.1-576s1c1	TRCN0000108890	Cttn	13043	10090	1.3728e+08	4544440	2408240	2051320	2764800	3476340	2408060	0.6927	2942200	0.271316
	DAS41	H	5	NM_007803.1-793s1c1	TRCN0000108893	Cttn	13043	10090	4.704e+07	5298040	9330920	6099880	4047200	7314480	5073540	0.69363	6194010	0.571183
	DAS41	H	1	NM_007803.1-1565s1c1	TRCN0000108892	Cttn	13043	10090	1.2192e+08	75680	17115840	12523760	13601280	8595760	13062520	1.51965	10829140	0.998613
	DAS41	E	3	NM_007803.4-319s21c1	TRCN0000335232	Cttn	13043	10090	1.3728e+08	14324000	10588480	9153120	10418480	12456240	9785800	0.785614	11121020	1.02553
	DAS41	A	12	NM_007803.1-694s1c1	TRCN0000108891	Cttn	13043	10090	1.3728e+08	10722560	11043800	11194720	11572680	10883180	11383700	1.04599	11133440	1.02667
	DAS36	E	7	NM_007806.3-269s21c1	TRCN0000240565	Cyba	13057	10090	1.0464e+08	6124560	5718640	6181800	4296440	5921600	5239120	0.884747	5580360	0.339796
	DAS36	A	6	NM_007806.3-417s21c1	TRCN0000245375	Cyba	13057	10090	4.416e+07	11963840	12922520	12510080	13060960	12443180	12785520	1.02751	12614350	0.768106
	DAS36	A	4	NM_007806.3-464s21c1	TRCN0000240562	Cyba	13057	10090	1.3728e+08	13135240	15061600	15740160	14434320	14098420	15087240	1.07014	14592830	0.888578
	DAS36	C	1	NM_007806.3-515s21c1	TRCN0000240563	Cyba	13057	10090	6.432e+07	16084560	15301800	15373480	15173680	15693180	15273580	0.973262	15483380	0.942805
	DAS36	B	7	NM_007806.3-167s21c1	TRCN0000240564	Cyba	13057	10090	8.448e+07	20560040	23017480	24899320	24794000	21788760	24846660	1.14034	23317710	1.41985
	DAS39	B	8	NM_146057.1-530s1c1	TRCN0000054493	Dap	223453	10090	1.3728e+08	11693560	3636040	3115760	6275720	7664800	4695740	0.612637	6180270	0.355874
	DAS39	E	3	NM_146057.1-261s1c1	TRCN0000054494	Dap	223453	10090	3840000	22229480	21343120	720960	1017480	21786300	869220	0.0398976	11327760	0.652279
	DAS39	G	11	NM_146057.1-223s1c1	TRCN0000054495	Dap	223453	10090	1.3728e+08	19188240	17426600	8043560	12074040	18307420	10058800	0.549438	14183110	0.816696
	DAS39	H	3	NM_146057.1-277s1c1	TRCN0000054497	Dap	223453	10090	1.3728e+08	19992120	18974040	10699080	13355680	19483080	12027380	0.617324	15755230	0.907223
	DAS39	F	2	NM_146057.1-368s1c1	TRCN0000054496	Dap	223453	10090	1.3728e+08	21428440	20475600	10538160	20326680	20952020	15432420	0.73656	18192220	1.04755
	DAS41	F	2	NM_013726.1-809s1c1	TRCN0000088096	Dbf4	27214	10090	1.3728e+08	5527200	6972760	2810400	3529520	6249980	3169960	0.507195	4709970	0.434332
	DAS41	E	5	NM_013726.1-2110s1c1	TRCN0000088093	Dbf4	27214	10090	1.3728e+08	8048080	6997600	6702160	4590560	7522840	5646360	0.750562	6584600	0.607201
	DAS41	G	1	NM_013726.2-1521s21c1	TRCN0000334054	Dbf4	27214	10090	1.3728e+08	3110400	12009840	9554600	6957880	7560120	8256240	1.09208	7908180	0.729256
	DAS41	A	1	NM_013726.1-1274s1c1	TRCN0000088097	Dbf4	27214	10090	1.3728e+08	11532120	10681320	8626800	10142400	11106720	9384600	0.844948	10245660	0.944807
	DAS41	C	8	NM_013726.2-907s21c1	TRCN0000348194	Dbf4	27214	10090	4.8e+07	15702320	11475360	13534880	13691480	13588840	13613180	1.00179	13601010	1.25422
	DAS45	B	6	NM_019813.2-1851s1c1	TRCN0000090074	Dbn1	56320	10090	9.408e+07	2822080	9117680	4501360	6600400	5969880	5550880	0.929814	5760380	0.675606
	DAS45	E	10	NM_019813.2-1522s1c1	TRCN0000090076	Dbn1	56320	10090	1.3728e+08	7101560	6081800	5480520	7966080	6591680	6723300	1.01997	6657490	0.780824
	DAS45	B	2	NM_019813.3-251s21c1	TRCN0000335207	Dbn1	56320	10090	1.3728e+08	6886560	9218080	5523040	8268720	8052320	6895880	0.856384	7474100	0.8766
	DAS45	C	12	NM_019813.2-2331s1c1	TRCN0000090073	Dbn1	56320	10090	3.552e+07	11449720	12968520	7852880	10812200	12209120	9332540	0.764391	10770830	1.26326
	DAS45	C	11	NM_019813.3-835s21c1	TRCN0000335208	Dbn1	56320	10090	1.3728e+08	14454640	16053080	11910520	15636080	15253860	13773300	0.902939	14513580	1.70223
	DAS37	A	11	NM_010070.3-1364s1c1	TRCN0000088817	Dok1	13448	10090	1.3728e+08	1175600	5045360	2368680	3069680	3110480	2719180	0.874199	2914830	0.195255
	DAS37	D	5	NM_010070.4-1496s21c1	TRCN0000294904	Dok1	13448	10090	1.3728e+08	5559880	7621240	5373400	5390040	6590560	5381720	0.81658	5986140	0.400991
	DAS37	H	8	NM_010070.4-158s21c1	TRCN0000287456	Dok1	13448	10090	1.1424e+08	6198960	6456360	6386240	6524600	6327660	6455420	1.02019	6391540	0.428147
	DAS37	E	6	NM_010070.3-926s1c1	TRCN0000088814	Dok1	13448	10090	1.3728e+08	8771080	5752720	7765440	7174760	7261900	7470100	1.02867	7366000	0.493423
	DAS37	D	4	NM_010070.4-1425s21c1	TRCN0000294903	Dok1	13448	10090	1.3728e+08	13675880	11620120	12139480	11924600	12648000	12032040	0.9513	12340020	0.826616
	DAS45	C	4	NM_138677.2-1102s21c1	TRCN0000292911	Edem1	192193	10090	1.3728e+08	1752320	3388760	1150240	1626680	2570540	1388460	0.540143	1979500	0.232166
	DAS45	F	1	NM_138677.2-2004s21c1	TRCN0000292840	Edem1	192193	10090	1.248e+08	3406440	3517080	2147760	2003240	3461760	2075500	0.599551	2768630	0.324719
	DAS45	C	7	NM_138677.1-581s1c1	TRCN0000018468	Edem1	192193	10090	1.3728e+08	2852080	3093280	2695840	6156880	2972680	4426360	1.48901	3699520	0.433898
	DAS45	G	6	NM_138677.1-639s1c1	TRCN0000018469	Edem1	192193	10090	1.3728e+08	5455400	6055360	6361680	6846120	5755380	6603900	1.14743	6179640	0.724779
	DAS45	D	9	NM_138677.2-1827s21c1	TRCN0000292909	Edem1	192193	10090	1.3728e+08	11149800	14052200	9704040	15090320	12601000	12397180	0.983825	12499090	1.46596
	DAS39	E	2	XM_134499.4-509s1c1	TRCN0000027491	Ednra	13617	10090	1.3728e+08	5052960	4176400	383920	1483680	4614680	933800	0.202354	2774240	0.159747
	DAS39	C	12	XM_134499.4-1691s1c1	TRCN0000027476	Ednra	13617	10090	8.352e+07	20744840	12529480	3043600	8277120	16637160	5660360	0.340224	11148760	0.641971
	DAS39	E	5	XM_134499.4-722s1c1	TRCN0000027461	Ednra	13617	10090	7.296e+07	16886760	12335320	8028280	13292160	14611040	10660220	0.7296	12635630	0.727589
	DAS39	H	8	XM_134499.4-1034s1c1	TRCN0000027460	Ednra	13617	10090	6.624e+07	16530680	14612240	9342960	12750440	15571460	11046700	0.70942	13309080	0.766368
	DAS39	B	5	XM_134499.4-1472s1c1	TRCN0000027456	Ednra	13617	10090	1.3344e+08	25621400	22620040	17883120	23948080	24120720	20915600	0.867122	22518160	1.29665
	DAS42	H	6	NM_010118.3-2699s21c1	TRCN0000235778	Egr2	13654	10090	1.3344e+08	1258640	2266040	252080	929000	1762340	590540	0.335089	1176440	0.159162
	DAS42	H	2	NM_010118.3-900s21c1	TRCN0000218224	Egr2	13654	10090	1.0176e+08	19000	6241840	1880	2749360	3130420	1375620	0.439436	2253020	0.304814
	DAS42	C	11	NM_010118.3-519s21c1	TRCN0000235775	Egr2	13654	10090	1.3728e+08	4382280	3501320	758040	1510080	3941800	1134060	0.287701	2537930	0.34336
	DAS42	D	10	NM_010118.3-1545s21c1	TRCN0000235777	Egr2	13654	10090	1.2576e+08	5411120	5699200	1088760	2592720	5555160	1840740	0.331357	3697950	0.500301
	DAS42	E	1	NM_010118.1-1032s1c1	TRCN0000081679	Egr2	13654	10090	1.3728e+08	52160	13851480	5560	12526160	6951820	6265860	0.901327	6608840	0.89412
	DAS45	B	4	NM_018781.1-1170s1c1	TRCN0000096139	Egr3	13655	10090	9.408e+07	7634640	8781040	3928200	5278240	8207840	4603220	0.560832	6405530	0.751273
	DAS45	A	11	NM_018781.2-168s21c1	TRCN0000449786	Egr3	13655	10090	9.024e+07	5397480	5876400	7577920	9777360	5636940	8677640	1.53942	7157290	0.839443
	DAS45	B	5	NM_018781.1-131s1c1	TRCN0000096142	Egr3	13655	10090	1.1616e+08	9197040	9622120	7189920	8280880	9409580	7735400	0.822077	8572490	1.00542
	DAS45	C	2	NM_018781.2-609s21c1	TRCN0000442315	Egr3	13655	10090	1.3728e+08	11286280	13628760	11647000	13349920	12457520	12498460	1.00329	12477990	1.46348
	DAS45	D	1	NM_018781.1-191s1c1	TRCN0000096141	Egr3	13655	10090	122880000	12078320	16151800	12353400	16319600	14115060	14336500	1.01569	14225780	1.66847
	DAS37	B	11	NM_007960.1-1347s1c1	TRCN0000075476	Etv1	14009	10090	1.3728e+08	8212520	11307240	10604600	8066560	9759880	9335580	0.956526	9547730	0.63957
	DAS37	E	10	NM_007960.1-1344s1c1	TRCN0000075475	Etv1	14009	10090	1.3728e+08	17211360	14698840	14586600	11923360	15955100	13254980	0.830768	14605040	0.978342
	DAS37	D	12	NM_007960.1-422s1c1	TRCN0000075474	Etv1	14009	10090	1.3728e+08	16874520	17436720	17205240	16327120	17155620	16766180	0.9773	16960900	1.13615
	DAS37	G	9	NM_007960.1-2448s1c1	TRCN0000075473	Etv1	14009	10090	1.3728e+08	18691240	18490920	19343640	17100560	18591080	18222100	0.980153	18406590	1.23299
	DAS37	G	7	NM_007960.1-1241s1c1	TRCN0000075477	Etv1	14009	10090	1.3536e+08	20471680	17900200	19878960	17079760	19185940	18479360	0.963172	18832650	1.26153
	DAS38	E	4	NM_009510.1-914s1c1	TRCN0000071883	Ezr	22350	10090	1.3728e+08	3591600	4395520	4152680	4811280	3993560	4481980	1.1223	4237770	0.237496
	DAS38	A	7	NM_009510.1-497s1c1	TRCN0000071886	Ezr	22350	10090	1.3728e+08	9629440	9788480	5784200	6489000	9708960	6136600	0.632055	7922780	0.444015
	DAS38	F	7	NM_009510.1-1521s1c1	TRCN0000071884	Ezr	22350	10090	1.3728e+08	8416240	14314320	8633040	7552920	11365280	8092980	0.712079	9729130	0.545247
	DAS38	B	3	NM_009510.1-759s1c1	TRCN0000071887	Ezr	22350	10090	1.3728e+08	21566760	23144440	25156600	24151080	22355600	24653840	1.1028	23504720	1.31727
	DAS38	C	12	NM_009510.2-2231s21c1	TRCN0000348506	Ezr	22350	10090	1.3728e+08	22136000	24363280	24570680	25503600	23249640	25037140	1.07688	24143390	1.35306
	DAS44	D	12	NM_007974.2-1255s1c1	TRCN0000026643	F2rl1	14063	10090	8.064e+07	3523800	3413920	4581280	3323160	3468860	3952220	1.13934	3710540	0.320702
	DAS44	B	5	NM_007974.2-2279s1c1	TRCN0000026630	F2rl1	14063	10090	1.2e+08	4016120	5020240	4528240	3955040	4518180	4241640	0.938794	4379910	0.378556
	DAS44	C	10	NM_007974.2-513s1c1	TRCN0000026627	F2rl1	14063	10090	9.504e+07	6171760	4752840	4748680	2727640	5462300	3738160	0.684356	4600230	0.397598
	DAS44	D	6	NM_007974.2-1198s1c1	TRCN0000026616	F2rl1	14063	10090	1.1616e+08	5696800	9019680	5793560	8434800	7358240	7114180	0.966832	7236210	0.625426
	DAS44	C	4	NM_007974.2-1025s1c1	TRCN0000026645	F2rl1	14063	10090	1.3728e+08	9003800	11031320	12755200	9924240	10017560	11339720	1.13198	10678640	0.922956
	DAS40	H	3	NM_024169.2-314s1c1	TRCN0000111830	Fkbp11	66120	10090	1.1136e+08	5147320	6889840	4282240	4545400	6018580	4413820	0.733366	5216200	0.482391
	DAS40	F	8	NM_024169.2-337s1c1	TRCN0000111832	Fkbp11	66120	10090	1.3728e+08	6187960	10555200	1489080	3558080	8371580	2523580	0.301446	5447580	0.503788
	DAS40	A	8	NM_024169.2-297s1c1	TRCN0000111834	Fkbp11	66120	10090	7.296e+07	4512880	12996000	5882360	4729440	8754440	5305900	0.606081	7030170	0.650145
	DAS40	D	11	NM_024169.2-449s1c1	TRCN0000111833	Fkbp11	66120	10090	1.0848e+08	6480080	12734560	8250680	7533480	9607320	7892080	0.821465	8749700	0.809166
	DAS40	D	1	NM_024169.2-537s1c1	TRCN0000111831	Fkbp11	66120	10090	7.488e+07	7427040	15124280	7291160	6371120	11275660	6831140	0.605831	9053400	0.837252
	DAS40	G	2	NM_010233.1-1050s21c1	TRCN0000306639	Fn1	14268	10090	1.3728e+08	4437360	6748440	1685680	1304720	5592900	1495200	0.267339	3544050	0.327751
	DAS40	C	4	XM_129845.3-8108s1c1	TRCN0000090368	Fn1	14268	10090	6.72e+07	4300880	8595760	5731320	3585400	6448320	4658360	0.722415	5553340	0.513569
	DAS40	D	7	NM_010233.1-4872s21c1	TRCN0000306574	Fn1	14268	10090	1.3728e+08	2428120	10714240	7471640	6581480	6571180	7026560	1.0693	6798870	0.628755
	DAS40	D	3	XM_129845.3-5056s1c1	TRCN0000090372	Fn1	14268	10090	3.936e+07	7545480	12548160	8077000	6862600	10046820	7469800	0.743499	8758310	0.809962
	DAS40	G	10	XM_129845.3-3050s1c1	TRCN0000090371	Fn1	14268	10090	1920000	16617880	18978400	1678480	1692960	17798140	1685720	0.0947133	9741930	0.900927
	DAS42	A	11	NM_010237.2-2368s21c1	TRCN0000274572	Frk	14302	10090	1.0944e+08	5291640	4244600	6720	4018600	4768120	2012660	0.422108	3390390	0.458691
	DAS42	H	3	NM_010237.2-1370s21c1	TRCN0000274516	Frk	14302	10090	122880000	882920	6860600	2280	6837400	3871760	3419840	0.883278	3645800	0.493246
	DAS42	B	3	NM_010237.2-1791s21c1	TRCN0000274574	Frk	14302	10090	9.408e+07	475160	10408280	3240	10940200	5441720	5471720	1.00551	5456720	0.738248
	DAS42	F	8	NM_010237.2-1248s21c1	TRCN0000274515	Frk	14302	10090	1.3728e+08	12673360	13807600	883360	12044280	13240480	6463820	0.488186	9852150	1.33291
	DAS42	D	11	NM_010237.2-1038s1c1	TRCN0000023322	Frk	14302	10090	1.632e+07	14230200	16222240	15794600	16850480	15226220	16322540	1.072	15774380	2.13414
	DAS38	F	5	NM_007984.1-181s1c1	TRCN0000108928	Fscn1	14086	10090	1.3728e+08	10381960	13834600	11985240	11620320	12108280	11802780	0.974769	11955530	0.670021
	DAS38	D	9	NM_007984.1-1593s1c1	TRCN0000108925	Fscn1	14086	10090	1.3728e+08	11964680	16458040	11222960	11210760	14211360	11216860	0.789288	12714110	0.712534
	DAS38	D	11	NM_007984.2-1083s21c1	TRCN0000374960	Fscn1	14086	10090	1.3728e+08	11863960	15493480	12494200	13735000	13678720	13114600	0.958759	13396660	0.750786
	DAS38	H	4	NM_007984.2-1465s21c1	TRCN0000363835	Fscn1	14086	10090	1.3728e+08	14870360	17071800	19953000	19362640	15971080	19657820	1.23084	17814450	0.998371
	DAS38	D	8	NM_007984.1-1299s1c1	TRCN0000108927	Fscn1	14086	10090	1.3728e+08	16975720	20841240	20736720	20133520	18908480	20435120	1.08074	19671800	1.10246
	DAS45	A	6	NM_010253.3-289s21c1	TRCN0000240596	Gal	14419	10090	69120000	749680	1518680	428160	755560	1134180	591860	0.52184	863020	0.101219
	DAS45	G	1	NM_010253.3-287s1c1	TRCN0000215311	Gal	14419	10090	9.408e+07	5295080	6687000	2298480	888400	5991040	1593440	0.265971	3792240	0.444773
	DAS45	E	12	NM_010253.3-325s21c1	TRCN0000240595	Gal	14419	10090	1.3728e+08	6836280	9289040	3438520	5393520	8062660	4416020	0.547713	6239340	0.731781
	DAS45	A	10	NM_010253.3-401s21c1	TRCN0000240598	Gal	14419	10090	1.3728e+08	8946520	6951920	6824280	7087040	7949220	6955660	0.875012	7452440	0.87406
	DAS45	A	2	NM_010253.2-400s1c1	TRCN0000180478	Gal	14419	10090	5.664e+07	8879560	9431240	8960520	8228080	9155400	8594300	0.938714	8874850	1.04089
	DAS42	D	5	NM_016722.3-96s21c1	TRCN0000287395	Galns	50917	10090	1.3728e+08	43120	4071480	6960	1670040	2057300	838500	0.407573	1447900	0.195889
	DAS42	C	4	NM_016722.3-206s21c1	TRCN0000287394	Galns	50917	10090	1.3728e+08	2344520	4611360	4520	5030280	3477940	2517400	0.723819	2997670	0.405559
	DAS42	B	5	NM_016722.3-1844s21c1	TRCN0000287393	Galns	50917	10090	1.2672e+08	3602760	6600960	6200	4663960	5101860	2335080	0.457692	3718470	0.503077
	DAS42	C	6	NM_016722.2-453s1c1	TRCN0000101806	Galns	50917	10090	0	8556480	10145320	24080	8946280	9350900	4485180	0.479652	6918040	0.935952
	DAS42	A	1	NM_016722.3-760s21c1	TRCN0000294888	Galns	50917	10090	1.1136e+08	17840	12801520	3920	17763920	6409680	8883920	1.38602	7646800	1.03455
	DAS40	B	12	NM_030228.2-636s21c1	TRCN0000247527	Gas2l1	78926	10090	1.2e+08	2389160	5704440	1374640	1384800	4046800	1379720	0.340941	2713260	0.25092
	DAS40	F	11	NM_030228.2-702s21c1	TRCN0000247528	Gas2l1	78926	10090	1.3728e+08	3747600	7997800	3340120	4185800	5872700	3762960	0.640755	4817830	0.44555
	DAS40	H	1	NM_030228.1-2449s1c1	TRCN0000198513	Gas2l1	78926	10090	1.1616e+08	5991720	8742560	8427160	6106520	7367140	7266840	0.986385	7316990	0.67667
	DAS40	G	9	NM_030228.2-382s21c1	TRCN0000247529	Gas2l1	78926	10090	1.3728e+08	6567040	14931040	6485320	7065640	10749040	6775480	0.630333	8762260	0.810328
	DAS40	F	2	NM_030228.2-134s21c1	TRCN0000247526	Gas2l1	78926	10090	1.3728e+08	9005080	12625560	11283840	11291000	10815320	11287420	1.04365	11051370	1.02202
	DAS40	F	5	NM_010276.1-572s1c1	TRCN0000102651	Gem	14579	10090	6.528e+07	7683240	11719960	7118120	5485560	9701600	6301840	0.649567	8001720	0.739994
	DAS40	B	6	NM_010276.1-338s1c1	TRCN0000102652	Gem	14579	10090	2.784e+07	6655640	12583840	9885320	7759240	9619740	8822280	0.917102	9221010	0.852753
	DAS40	B	8	NM_010276.1-948s1c1	TRCN0000102654	Gem	14579	10090	8.64e+07	8313400	14959560	11882920	9216720	11636480	10549820	0.906616	11093150	1.02589
	DAS40	A	6	NM_010276.1-1638s1c1	TRCN0000102650	Gem	14579	10090	7.584e+07	9290760	13540480	13308840	11756280	11415620	12532560	1.09784	11974090	1.10736
	DAS40	B	7	NM_010276.1-446s1c1	TRCN0000102653	Gem	14579	10090	5.568e+07	16324680	20622680	21311680	21165880	18473680	21238780	1.14968	19856230	1.83629
	DAS42	G	12	NM_008122.3-872s21c1	TRCN0000319610	Gjc1	14615	10090	1.2096e+08	6713480	6054200	295240	4264840	6383840	2280040	0.357158	4331940	0.586075
	DAS42	G	4	NM_008122.3-2271s21c1	TRCN0000319672	Gjc1	14615	10090	1.3728e+08	6997720	8800000	9360	7367400	7898860	3688380	0.466951	5793620	0.783827
	DAS42	C	10	NM_008122.1-1176s1c1	TRCN0000068642	Gjc1	14615	10090	6.72e+07	8136560	12684280	54680	7891080	10410420	3972880	0.381625	7191650	0.972969
	DAS42	C	2	NM_008122.3-1103s21c1	TRCN0000319673	Gjc1	14615	10090	1.3728e+08	9660240	11584480	3360	11056040	10622360	5529700	0.520572	8076030	1.09262
	DAS42	F	11	NM_008122.3-1641s21c1	TRCN0000319671	Gjc1	14615	10090	9.312e+07	11901440	8926680	347960	12258600	10414060	6303280	0.605266	8358670	1.13086
	DAS38	G	7	NM_028608.3-623s21c1	TRCN0000305143	Glipr1	73690	10090	1.3728e+08	3355280	4623480	3241600	813200	3989380	2027400	0.508199	3008390	0.168599
	DAS38	D	4	NM_028608.3-483s21c1	TRCN0000308631	Glipr1	73690	10090	1.3728e+08	11335120	17150720	10881880	11313600	14242920	11097740	0.779176	12670330	0.71008
	DAS38	C	6	NM_028608.3-652s21c1	TRCN0000305085	Glipr1	73690	10090	1.3728e+08	13711640	15128920	11509720	10824680	14420280	11167200	0.774409	12793740	0.716997
	DAS38	D	3	NM_028608.3-681s21c1	TRCN0000308632	Glipr1	73690	10090	1.3728e+08	13725760	15607960	15433720	14988960	14666860	15211340	1.03712	14939100	0.837229
	DAS38	E	5	NM_028608.3-524s21c1	TRCN0000305079	Glipr1	73690	10090	1.3728e+08	13704720	19804040	14081680	15725800	16754380	14903740	0.889543	15829060	0.887104
	DAS38	C	1	NM_008142.3-524s21c1	TRCN0000301617	Gnb1	14688	10090	1.3728e+08	7864760	10460200	5993520	6848120	9162480	6420820	0.700773	7791650	0.436666
	DAS38	A	2	NM_008142.3-51s21c1	TRCN0000301619	Gnb1	14688	10090	1.3728e+08	12105920	13125480	12565360	13741480	12615700	13153420	1.04262	12884560	0.722086
	DAS38	F	12	NM_008142.3-791s21c1	TRCN0000301616	Gnb1	14688	10090	1.3728e+08	11900480	16881280	12877600	10836040	14390880	11856820	0.823912	13123850	0.735497
	DAS38	A	9	NM_008142.3-86s21c1	TRCN0000301618	Gnb1	14688	10090	1.3728e+08	15193000	17315200	15743800	15799760	16254100	15771780	0.970326	16012940	0.89741
	DAS38	A	11	NM_008142.2-1481s1c1	TRCN0000034429	Gnb1	14688	10090	1.3728e+08	17709200	17974480	16130120	18026440	17841840	17078280	0.957204	17460060	0.97851
	DAS41	F	4	NM_031999.2-2700s21c1	TRCN0000243489	Gpr137b	83924	10090	1.3728e+08	4579480	3755520	1372520	1183360	4167500	1277940	0.306644	2722720	0.251077
	DAS41	B	2	NM_031999.2-447s21c1	TRCN0000243491	Gpr137b	83924	10090	1.3728e+08	6131120	4885240	2850600	3152800	5508180	3001700	0.544953	4254940	0.392371
	DAS41	E	8	NM_031999.1-497s1c1	TRCN0000173595	Gpr137b	83924	10090	1.056e+08	5355320	6927320	4082840	5051400	6141320	4567120	0.743671	5354220	0.493741
	DAS41	C	10	NM_031999.2-249s21c1	TRCN0000241828	Gpr137b	83924	10090	1.3728e+08	8628320	8480920	8439440	10551760	8554620	9495600	1.11	9025110	0.832254
	DAS41	F	11	NM_031999.2-464s21c1	TRCN0000241829	Gpr137b	83924	10090	1.1904e+08	12860960	10485440	9712000	10356160	11673200	10034080	0.859583	10853640	1.00087
	DAS39	C	10	NM_011824.3-771s1c1	TRCN0000098300	Grem1	23892	10090	1.3728e+08	9739800	4647480	3635080	6121880	7193640	4878480	0.678166	6036060	0.34757
	DAS39	C	5	NM_011824.3-413s1c1	TRCN0000098301	Grem1	23892	10090	1.3728e+08	14957880	7742160	2385800	6358880	11350020	4372340	0.385228	7861180	0.452665
	DAS39	F	7	NM_011824.3-685s1c1	TRCN0000098302	Grem1	23892	10090	1.3728e+08	11233680	10580880	8019640	9236840	10907280	8628240	0.791053	9767760	0.56245
	DAS39	A	5	NM_011824.3-567s1c1	TRCN0000098303	Grem1	23892	10090	9.216e+07	21435080	19433080	16733600	21340240	20434080	19036920	0.931626	19735500	1.13642
	DAS39	F	8	NM_011824.3-422s1c1	TRCN0000098304	Grem1	23892	10090	8.352e+07	22508040	19610840	20084160	23496880	21059440	21790520	1.03472	21424980	1.2337
	DAS39	F	11	NM_026231.2-1310s1c1	TRCN0000097433	Gstcd	67553	10090	1.3728e+08	14469800	5562000	1550760	3857160	10015900	2703960	0.269967	6359930	0.36622
	DAS39	E	8	NM_026231.2-1122s1c1	TRCN0000097430	Gstcd	67553	10090	1.3728e+08	12930640	7083080	4189040	6102840	10006860	5145940	0.514241	7576400	0.436267
	DAS39	D	11	NM_026231.2-2356s1c1	TRCN0000097429	Gstcd	67553	10090	122880000	21436880	16839680	9554400	13773080	19138280	11663740	0.609446	15401010	0.886826
	DAS39	D	5	NM_026231.2-692s1c1	TRCN0000097431	Gstcd	67553	10090	1.1904e+08	24389840	22708040	17955920	22859400	23548940	20407660	0.866606	21978300	1.26556
	DAS39	G	4	NM_026231.2-1583s1c1	TRCN0000097432	Gstcd	67553	10090	1.3728e+08	22903760	21080720	22177600	24422200	21992240	23299900	1.05946	22646070	1.30401
	DAS41	A	6	NM_008216.3-1520s21c1	TRCN0000337811	Has2	15117	10090	1.3728e+08	1834840	638320	513600	1132680	1236580	823140	0.665659	1029860	0.0949689
	DAS41	D	3	NM_008216.2-888s1c1	TRCN0000076276	Has2	15117	10090	1.3728e+08	4275760	3059680	1273520	1558600	3667720	1416060	0.386087	2541890	0.234401
	DAS41	C	12	NM_008216.3-946s21c1	TRCN0000337829	Has2	15117	10090	1.3728e+08	4568600	4583480	2325160	3275160	4576040	2800160	0.611918	3688100	0.340099
	DAS41	F	12	NM_008216.3-838s21c1	TRCN0000337814	Has2	15117	10090	1.1808e+08	8044800	7702680	6753160	7168360	7873740	6960760	0.884047	7417250	0.683984
	DAS41	G	12	NM_008216.3-2417s21c1	TRCN0000337813	Has2	15117	10090	1.3728e+08	8232840	8631880	6812760	7649480	8432360	7231120	0.857544	7831740	0.722207
	DAS44	E	11	NM_008234.3-1867s21c1	TRCN0000304507	Hells	15201	10090	1.3728e+08	6553880	4607480	6467960	5885720	5580680	6176840	1.10683	5878760	0.508102
	DAS44	F	6	NM_008234.3-549s21c1	TRCN0000331756	Hells	15201	10090	1.3728e+08	8651360	6141040	5724400	8514520	7396200	7119460	0.962583	7257830	0.627295
	DAS44	C	7	NM_008234.2-1010s1c1	TRCN0000039048	Hells	15201	10090	1.3728e+08	6475120	10446200	6467720	11394400	8460660	8931060	1.0556	8695860	0.751584
	DAS44	D	9	NM_008234.2-1177s1c1	TRCN0000039044	Hells	15201	10090	1.3728e+08	9615240	9212080	10037480	11048520	9413660	10543000	1.11997	9978330	0.862428
	DAS44	G	3	NM_008234.2-1766s1c1	TRCN0000039045	Hells	15201	10090	9.408e+07	10837360	11677960	10451320	9251720	11257660	9851520	0.875095	10554590	0.912234
	DAS43	C	9	XM_486109.1-885s1c1	TRCN0000075583	Hmgb2	97165	10090	8.64e+07	826080	1057240	272840	241600	941660	257220	0.273156	599440	0.0619169
	DAS43	D	5	NM_008252.2-519s21c1	TRCN0000304268	Hmgb2	97165	10090	1.2192e+08	2136840	2598080	1174320	1915200	2367460	1544760	0.652497	1956110	0.202049
	DAS43	D	6	NM_008252.2-682s21c1	TRCN0000310863	Hmgb2	97165	10090	1.3728e+08	5122360	4943200	5005000	2572640	5032780	3788820	0.752828	4410800	0.455597
	DAS43	H	4	XM_486109.1-787s1c1	TRCN0000075587	Hmgb2	97165	10090	6.528e+07	4325800	8741960	2906120	1923280	6533880	2414700	0.369566	4474290	0.462155
	DAS43	H	3	NM_008252.2-348s21c1	TRCN0000304269	Hmgb2	97165	10090	1.3728e+08	13280720	18783040	19080480	16468480	16031880	17774480	1.1087	16903180	1.74595
	DAS38	H	5	NM_008255.1-1024s1c1	TRCN0000173340	Hmgcr	15357	10090	1.3728e+08	11919280	10080720	3010200	4578560	11000000	3794380	0.344944	7397190	0.414559
	DAS38	C	4	NM_008255.1-274s1c1	TRCN0000173635	Hmgcr	15357	10090	1.3728e+08	13452000	12638600	11710480	10138960	13045300	10924720	0.837445	11985010	0.671673
	DAS38	G	10	NM_008255.1-470s1c1	TRCN0000173464	Hmgcr	15357	10090	1.3728e+08	12733200	13726320	14110160	13522840	13229760	13816500	1.04435	13523130	0.757874
	DAS38	C	5	NM_008255.1-815s1c1	TRCN0000173543	Hmgcr	15357	10090	1.3728e+08	15539480	17707040	17066320	14960960	16623260	16013640	0.963327	16318450	0.914531
	DAS38	H	6	NM_008255.1-3201s1c1	TRCN0000173307	Hmgcr	15357	10090	1.3728e+08	20402880	23005720	26364600	25678440	21704300	26021520	1.19891	23862910	1.33734
	DAS43	B	10	NM_133662.2-435s21c1	TRCN0000353512	Ier3	15937	10090	1.2096e+08	3190760	2708360	3336720	4879920	2949560	4108320	1.39286	3528940	0.364508
	DAS43	C	3	NM_133662.2-496s21c1	TRCN0000336543	Ier3	15937	10090	1.3728e+08	3417440	5571600	4637920	2602640	4494520	3620280	0.805488	4057400	0.419094
	DAS43	C	5	NM_133662.1-760s1c2	TRCN0000193083	Ier3	15937	10090	1.3728e+08	4834200	7765360	4423160	3767160	6299780	4095160	0.650048	5197470	0.536853
	DAS43	B	12	NM_133662.1-578s1c1	TRCN0000175403	Ier3	15937	10090	5.568e+07	4731320	7240600	7746360	5672480	5985960	6709420	1.12086	6347690	0.65566
	DAS43	C	7	NM_133662.2-784s21c1	TRCN0000375069	Ier3	15937	10090	1.3728e+08	9741320	12407840	13655000	9230200	11074580	11442600	1.03323	11258590	1.16291
	DAS39	D	4	NM_025841.1-185s1c1	TRCN0000093586	Kdelr2	66913	10090	1.3728e+08	7051200	3143360	390520	1200960	5097280	795740	0.156111	2946510	0.169667
	DAS39	D	10	NM_025841.1-360s1c1	TRCN0000093588	Kdelr2	66913	10090	8.832e+07	8904800	1440520	467880	1310280	5172660	889080	0.171881	3030870	0.174525
	DAS39	A	9	NM_025841.1-391s1c1	TRCN0000093585	Kdelr2	66913	10090	6.528e+07	16267640	12172400	7703320	12689960	14220020	10196640	0.717062	12208330	0.702984
	DAS39	A	11	NM_025841.1-698s1c1	TRCN0000093587	Kdelr2	66913	10090	69120000	19609880	15473680	12071080	17198640	17541780	14634860	0.834286	16088320	0.926403
	DAS39	D	7	NM_025841.1-1080s1c1	TRCN0000093584	Kdelr2	66913	10090	1.3728e+08	18387280	17262880	16483480	17812720	17825080	17148100	0.962021	17486590	1.00692
	DAS37	F	10	NM_010688.2-462s1c1	TRCN0000075565	Lasp1	16796	10090	8.352e+07	5577560	1482320	2888520	1868560	3529940	2378540	0.673819	2954240	0.197894
	DAS37	F	7	NM_010688.2-274s1c1	TRCN0000075564	Lasp1	16796	10090	1.0848e+08	7089760	2969360	3784800	3804000	5029560	3794400	0.75442	4411980	0.295543
	DAS37	E	9	NM_010688.2-373s1c1	TRCN0000075566	Lasp1	16796	10090	1.248e+08	6985320	6834760	5694680	4209040	6910040	4951860	0.716618	5930950	0.397294
	DAS37	C	12	NM_010688.2-2493s1c1	TRCN0000075563	Lasp1	16796	10090	1.3728e+08	5360880	8643000	7454440	7223320	7001940	7338880	1.04812	7170410	0.480321
	DAS37	C	5	NM_010688.4-248s21c1	TRCN0000301418	Lasp1	16796	10090	1.3728e+08	23330840	25612240	22606640	21615600	24471540	22111120	0.903544	23291330	1.56021
	DAS40	E	8	NM_029999.3-496s1c1	TRCN0000095611	Lbh	77889	10090	5.568e+07	5123920	9444920	4178120	4184680	7284420	4181400	0.57402	5732910	0.530176
	DAS40	F	12	NM_029999.3-334s1c1	TRCN0000095613	Lbh	77889	10090	9.792e+07	6133200	8882320	6385240	6386400	7507760	6385820	0.850563	6946790	0.642434
	DAS40	E	11	NM_029999.3-301s1c1	TRCN0000095610	Lbh	77889	10090	1.0656e+08	6589040	10986520	8251320	7861880	8787780	8056600	0.916796	8422190	0.778878
	DAS40	C	10	NM_029999.3-261s1c1	TRCN0000095612	Lbh	77889	10090	1.008e+08	10196720	16391040	11919880	10988640	13293880	11454260	0.861619	12374070	1.14435
	DAS40	D	2	NM_029999.3-1832s1c1	TRCN0000095609	Lbh	77889	10090	7.968e+07	8699880	16778680	12250000	12868280	12739280	12559140	0.985859	12649210	1.16979
	DAS42	D	7	NM_008515.4-1820s21c1	TRCN0000351054	Lrrfip1	16978	10090	1.3728e+08	1638440	2069080	51680	2309040	1853760	1180360	0.636738	1517060	0.205245
	DAS42	F	2	NM_008515.4-534s21c1	TRCN0000340185	Lrrfip1	16978	10090	1.3728e+08	16480	8884560	2720	3195280	4450520	1599000	0.359284	3024760	0.409224
	DAS42	D	8	NM_008515.4-1498s21c1	TRCN0000340251	Lrrfip1	16978	10090	1.3728e+08	5072560	2902240	223240	4093120	3987400	2158180	0.54125	3072790	0.415722
	DAS42	D	12	NM_008515.4-2595s21c1	TRCN0000340252	Lrrfip1	16978	10090	1.248e+08	3886400	5458640	3867120	4096480	4672520	3981800	0.852174	4327160	0.585428
	DAS42	B	7	NM_008515.1-993s1c1	TRCN0000102228	Lrrfip1	16978	10090	3.264e+07	10268400	9746280	1913360	10797360	10007340	6355360	0.63507	8181350	1.10687
	DAS42	A	6	NM_010807.2-1293s1c1	TRCN0000198654	Marcksl1	17357	10090	1.3728e+08	139520	1275520	8400	569920	707520	289160	0.408695	498340	0.0674212
	DAS42	D	2	NM_010807.2-285s1c1	TRCN0000200186	Marcksl1	17357	10090	1.3728e+08	881880	15799640	2600	12251360	8340760	6126980	0.734583	7233870	0.978681
	DAS42	F	9	NM_010807.2-1399s1c1	TRCN0000177817	Marcksl1	17357	10090	122880000	6000720	11066680	683440	11686680	8533700	6185060	0.724781	7359380	0.995661
	DAS42	C	1	NM_010807.3-996s21c1	TRCN0000336432	Marcksl1	17357	10090	1.3728e+08	6130560	15068400	5640	16567200	10599480	8286420	0.781776	9442950	1.27755
	DAS42	E	8	NM_010807.2-443s1c1	TRCN0000176619	Marcksl1	17357	10090	1.3728e+08	18571880	17047320	213080	20718360	17809600	10465720	0.587645	14137660	1.9127
	DAS39	D	2	NM_008567.1-2745s1c1	TRCN0000124139	Mcm6	17219	10090	1.008e+08	15982040	3816800	1020720	2930520	9899420	1975620	0.199569	5937520	0.341896
	DAS39	E	6	NM_008567.1-2521s1c1	TRCN0000124143	Mcm6	17219	10090	5.472e+07	12081000	7109240	3011920	7337000	9595120	5174460	0.53928	7384790	0.425233
	DAS39	E	7	NM_008567.1-1611s1c1	TRCN0000124140	Mcm6	17219	10090	7.296e+07	17156880	12680200	6570880	12866480	14918540	9718680	0.65145	12318610	0.709334
	DAS39	A	7	NM_008567.1-1055s1c1	TRCN0000124142	Mcm6	17219	10090	4.704e+07	24339200	17446080	10166520	13568040	20892640	11867280	0.568012	16379960	0.943196
	DAS39	A	6	NM_008567.1-1337s1c1	TRCN0000124141	Mcm6	17219	10090	4.992e+07	22289160	19846680	20272760	21727440	21067920	21000100	0.996781	21034010	1.21119
	DAS41	E	11	NM_001001880.1-752s1c1	TRCN0000091519	Mpzl1	68481	10090	1.3728e+08	6905840	6492120	5748600	5170720	6698980	5459660	0.814999	6079320	0.560607
	DAS41	D	8	NM_001001880.1-523s1c1	TRCN0000091521	Mpzl1	68481	10090	34560000	11527120	6310720	3556040	4750200	8918920	4153120	0.465653	6536020	0.602721
	DAS41	E	2	NM_001001880.1-319s1c1	TRCN0000091522	Mpzl1	68481	10090	9600000	18533920	12352440	9242960	8704080	15443180	8973520	0.581067	12208350	1.1258
	DAS41	C	7	NM_001001880.1-263s1c1	TRCN0000091520	Mpzl1	68481	10090	6.528e+07	21218720	13766840	16891520	17582680	17492780	17237100	0.985384	17364940	1.60131
	DAS40	C	1	NM_010849.4-925s21c1	TRCN0000234925	Myc	17869	10090	9.696e+07	1582640	2744360	1375800	1815920	2163500	1595860	0.737629	1879680	0.173832
	DAS40	A	11	NM_010849.4-675s21c1	TRCN0000234924	Myc	17869	10090	1.3056e+08	911520	5561560	1988120	1349120	3236540	1668620	0.515557	2452580	0.226813
	DAS40	D	9	NM_010849.4-2082s21c1	TRCN0000234927	Myc	17869	10090	9.216e+07	1296960	5054920	2486600	1561680	3175940	2024140	0.637336	2600040	0.24045
	DAS40	C	3	NM_010849.4-643s21c1	TRCN0000234923	Myc	17869	10090	1.3728e+08	3603400	5784480	3253200	2444720	4693940	2848960	0.606944	3771450	0.348781
	DAS40	G	11	NM_010849.2-1675s1c1	TRCN0000054857	Myc	17869	10090	1.3728e+08	10853320	12481880	8726840	8428440	11667600	8577640	0.735167	10122620	0.936133
	DAS40	B	11	NM_010863.2-2324s21c1	TRCN0000302792	Myo1b	17912	10090	1.3728e+08	2817880	7388920	5428800	3293600	5103400	4361200	0.854568	4732300	0.43764
	DAS40	C	11	NM_010863.2-3321s21c1	TRCN0000302794	Myo1b	17912	10090	1.3728e+08	2913840	9430720	3863960	4653080	6172280	4258520	0.689943	5215400	0.482317
	DAS40	B	1	NM_010863.2-3626s21c1	TRCN0000302721	Myo1b	17912	10090	1.3536e+08	7144040	11573760	9167520	4460480	9358900	6814000	0.728077	8086450	0.747829
	DAS40	F	6	NM_010863.2-396s21c1	TRCN0000302793	Myo1b	17912	10090	1.3728e+08	8566400	12552960	9495600	6740600	10559680	8118100	0.768783	9338890	0.863654
	DAS40	H	8	NM_010863.2-1168s21c1	TRCN0000302795	Myo1b	17912	10090	7.104e+07	11195800	14905840	13180760	13493680	13050820	13337220	1.02194	13194020	1.22017
	DAS43	E	7	NM_015742.2-1235s21c1	TRCN0000362502	Myo9b	17925	10090	1.3728e+08	1975960	2358200	1408520	1511880	2167080	1460200	0.67381	1813640	0.187333
	DAS43	D	2	NM_015742.2-4548s21c1	TRCN0000362422	Myo9b	17925	10090	1.3728e+08	1985120	2131520	1540320	2200680	2058320	1870500	0.908751	1964410	0.202906
	DAS43	B	6	NM_015742.1-4533s1c1	TRCN0000025897	Myo9b	17925	10090	1.3728e+08	3767200	2791920	1796240	2155240	3279560	1975740	0.602441	2627650	0.271413
	DAS43	G	6	NM_015742.2-2297s21c1	TRCN0000362501	Myo9b	17925	10090	1.3728e+08	2290480	6446920	4601320	1923120	4368700	3262220	0.746726	3815460	0.394103
	DAS43	A	10	NM_015742.2-1620s21c1	TRCN0000362423	Myo9b	17925	10090	6.72e+07	3256640	7130320	5853280	7920240	5193480	6886760	1.32604	6040120	0.623891
	DAS44	F	11	NM_010875.3-436s21c1	TRCN0000335736	Ncam1	17967	10090	1.3728e+08	5495360	2575480	1503360	2447320	4035420	1975340	0.4895	3005380	0.259755
	DAS44	E	8	NM_010875.3-2952s21c1	TRCN0000348577	Ncam1	17967	10090	1.3728e+08	4413720	5559440	3992760	3746080	4986580	3869420	0.775967	4428000	0.382713
	DAS44	E	12	NM_010875.3-1679s21c1	TRCN0000335737	Ncam1	17967	10090	1.2384e+08	3973920	6185880	4610360	3160480	5079900	3885420	0.764862	4482660	0.387437
	DAS44	G	9	NM_010875.3-1924s21c1	TRCN0000335658	Ncam1	17967	10090	1.3728e+08	6382760	6337920	4960560	3513520	6360340	4237040	0.666166	5298690	0.457966
	DAS44	A	10	NM_010875.2-597s1c1	TRCN0000113650	Ncam1	17967	10090	1.2864e+08	9101720	7773880	7961360	7144040	8437800	7552700	0.895103	7995250	0.69103
	DAS36	B	5	NM_009750.1-465s1c1	TRCN0000124635	Ngfrap1	12070	10090	6.528e+07	7799360	9179680	6555000	8106640	8489520	7330820	0.863514	7910170	0.481661
	DAS36	F	4	NM_009750.2-589s21c1	TRCN0000332418	Ngfrap1	12070	10090	1.2864e+08	9470960	12575760	10328280	10767960	11023360	10548120	0.956888	10785740	0.656759
	DAS36	E	1	NM_009750.2-509s21c1	TRCN0000306450	Ngfrap1	12070	10090	1.3728e+08	11622560	17001000	10226800	14955120	14311780	12590960	0.879762	13451370	0.819073
	DAS36	C	6	NM_009750.2-617s21c1	TRCN0000306449	Ngfrap1	12070	10090	61440000	13193440	13220440	15932320	13347800	13206940	14640060	1.10851	13923500	0.847822
	DAS36	B	3	NM_009750.2-716s21c1	TRCN0000306389	Ngfrap1	12070	10090	1.0368e+08	13804120	16223800	15388560	14351360	15013960	14869960	0.990409	14941960	0.909837
	DAS37	A	7	NM_008708.1-540s21c1	TRCN0000249205	Nmt2	18108	10090	1.3728e+08	9424280	9824400	8592160	7843480	9624340	8217820	0.853858	8921080	0.597593
	DAS37	D	8	NM_008708.1-1511s21c1	TRCN0000257854	Nmt2	18108	10090	1.3728e+08	11856760	15327600	10769920	12074840	13592180	11422380	0.840364	12507280	0.83782
	DAS37	C	4	NM_008708.1-1364s21c1	TRCN0000249203	Nmt2	18108	10090	1.3728e+08	11199720	16099120	12827720	14438720	13649420	13633220	0.998813	13641320	0.913786
	DAS37	G	1	NM_008708.1-795s21c1	TRCN0000249204	Nmt2	18108	10090	1.3728e+08	12358960	20738120	16285040	14172320	16548540	15228680	0.920243	15888610	1.06432
	DAS37	A	4	NM_008708.1-1621s21c1	TRCN0000249206	Nmt2	18108	10090	1.3728e+08	20799120	20910920	19909520	18538240	20855020	19223880	0.921787	20039450	1.34237
	DAS38	E	12	NM_010151.1-848s1c1	TRCN0000026161	Nr2f1	13865	10090	1.2864e+08	4427560	2953160	914920	1618400	3690360	1266660	0.343235	2478510	0.138903
	DAS38	G	9	NM_010151.1-1192s1c1	TRCN0000026198	Nr2f1	13865	10090	1.3728e+08	8599040	7208200	10609920	10263200	7903620	10436560	1.32048	9170090	0.513917
	DAS38	F	2	NM_010151.1-1530s1c1	TRCN0000026160	Nr2f1	13865	10090	1.3728e+08	12642600	13416080	15738840	13854160	13029340	14796500	1.13563	13912920	0.779719
	DAS38	H	3	NM_010151.1-1458s1c1	TRCN0000026165	Nr2f1	13865	10090	1.3728e+08	13370600	14416480	15076080	14943120	13893540	15009600	1.08033	14451570	0.809906
	DAS38	G	8	NM_010151.1-1263s1c1	TRCN0000026234	Nr2f1	13865	10090	1.3728e+08	20133240	21569520	23329640	23242360	20851380	23286000	1.11676	22068690	1.23679
	DAS37	E	12	NM_008776.1-488s1c1	TRCN0000054524	Pafah1b3	18476	10090	1.3728e+08	3519040	7137880	5133760	3839640	5328460	4486700	0.842026	4907580	0.328742
	DAS37	C	6	NM_008776.1-694s1c1	TRCN0000054527	Pafah1b3	18476	10090	1.3728e+08	7360040	7202120	9045280	8747880	7281080	8896580	1.22188	8088830	0.541843
	DAS37	A	5	NM_008776.1-589s1c1	TRCN0000054525	Pafah1b3	18476	10090	1.152e+08	10617280	12849920	11528080	9852840	11733600	10690460	0.911098	11212030	0.751056
	DAS37	F	5	NM_008776.1-217s1c2	TRCN0000174219	Pafah1b3	18476	10090	1.2672e+08	16161600	12998120	13127760	12201000	14579860	12664380	0.868622	13622120	0.912499
	DAS37	B	12	NM_008776.1-667s1c1	TRCN0000054523	Pafah1b3	18476	10090	11520000	20083480	19230760	16332600	15986960	19657120	16159780	0.822083	17908450	1.19963
	DAS45	F	10	NM_023209.2-1291s21c1	TRCN0000322169	Pbk	52033	10090	1.3728e+08	1709760	3655600	2032160	2866760	2682680	2449460	0.913065	2566070	0.300962
	DAS45	D	5	NM_023209.1-483s1c1	TRCN0000026712	Pbk	52033	10090	1.3728e+08	5923760	5419680	3125520	5446480	5671720	4286000	0.755679	4978860	0.583946
	DAS45	G	11	NM_023209.1-374s1c1	TRCN0000026752	Pbk	52033	10090	1.1328e+08	6142960	5166120	4015840	4807920	5654540	4411880	0.780237	5033210	0.59032
	DAS45	C	3	NM_023209.1-946s1c1	TRCN0000026700	Pbk	52033	10090	8.64e+07	6496840	8900600	7080880	7646320	7698720	7363600	0.956471	7531160	0.883292
	DAS45	A	12	NM_023209.2-1128s21c1	TRCN0000322233	Pbk	52033	10090	1.3728e+08	7563800	9471320	6724040	11136480	8517560	8930260	1.04845	8723910	1.02318
	DAS38	D	1	NM_019417.1-171s1c1	TRCN0000075389	Pdlim4	30794	10090	1.3728e+08	10592720	8808320	6164400	7662160	9700520	6913280	0.712671	8306900	0.465542
	DAS38	A	4	NM_019417.1-927s1c1	TRCN0000075391	Pdlim4	30794	10090	1.3728e+08	16915800	16400240	12640320	11848760	16658020	12244540	0.735054	14451280	0.80989
	DAS38	G	1	NM_019417.1-928s1c1	TRCN0000075388	Pdlim4	30794	10090	1.3728e+08	16826520	15604040	13984320	14228600	16215280	14106460	0.869949	15160870	0.849657
	DAS38	B	11	NM_019417.1-841s1c1	TRCN0000075392	Pdlim4	30794	10090	1.3728e+08	15051240	19147960	13657560	15605920	17099600	14631740	0.855677	15865670	0.889156
	DAS38	A	10	NM_019417.1-318s1c1	TRCN0000075390	Pdlim4	30794	10090	1.3728e+08	18861040	20958240	19737160	18090680	19909640	18913920	0.949988	19411780	1.08789
	DAS36	B	6	NM_019809.2-434s21c1	TRCN0000304703	Pdlim5	56376	10090	7.488e+07	9522200	11196360	11375000	10864720	10359280	11119860	1.07342	10739570	0.653948
	DAS36	F	10	NM_019809.2-370s21c1	TRCN0000304758	Pdlim5	56376	10090	1.3728e+08	9395600	12990760	10704000	12311480	11193180	11507740	1.0281	11350460	0.691146
	DAS36	A	3	NM_019809.2-610s21c1	TRCN0000302496	Pdlim5	56376	10090	1.2192e+08	12010000	13664160	13305840	11499520	12837080	12402680	0.966161	12619880	0.768442
	DAS36	F	9	NM_019809.2-904s21c1	TRCN0000304756	Pdlim5	56376	10090	1.1424e+08	14912080	16542000	18519760	17919560	15727040	18219660	1.15849	16973350	1.03353
	DAS36	H	1	NM_019809.2-1109s21c1	TRCN0000304702	Pdlim5	56376	10090	1.3728e+08	17639240	20536000	20835040	23304280	19087620	22069660	1.15623	20578640	1.25306
	DAS38	E	1	NM_199317.1-1579s1c1	TRCN0000104053	Phf16	382207	10090	1.3728e+08	7211600	8307480	9114240	7330160	7759540	8222200	1.05962	7990870	0.447831
	DAS38	E	9	NM_199317.1-482s1c1	TRCN0000104051	Phf16	382207	10090	1.3728e+08	12020400	9677320	9665920	10790880	10848860	10228400	0.942809	10538630	0.590614
	DAS38	C	3	NM_199317.1-2275s1c1	TRCN0000104052	Phf16	382207	10090	1.3728e+08	15465840	20188400	6386640	6681320	17827120	6533980	0.366519	12180550	0.682632
	DAS38	H	8	NM_199317.1-163s1c1	TRCN0000104054	Phf16	382207	10090	69120000	13950640	14844000	10977160	12997080	14397320	11987120	0.832594	13192220	0.739329
	DAS38	B	5	NM_199317.1-1753s1c1	TRCN0000104050	Phf16	382207	10090	1.3728e+08	25783680	30250320	31576760	32421920	28017000	31999340	1.14214	30008170	1.68174
	DAS44	E	10	NM_016966.3-909s21c1	TRCN0000316644	Phgdh	236539	10090	1.3728e+08	8606120	4111400	3992920	3643160	6358760	3818040	0.600438	5088400	0.439791
	DAS44	C	5	NM_016966.2-579s1c1	TRCN0000041624	Phgdh	236539	10090	1.1232e+08	7716080	7726400	8889200	9142800	7721240	9016000	1.16769	8368620	0.723301
	DAS44	H	2	NM_016966.2-1254s1c1	TRCN0000041627	Phgdh	236539	10090	7.776e+07	12162920	14900600	10003040	12593840	13531760	11298440	0.834957	12415100	1.07304
	DAS44	H	5	NM_016966.3-1703s21c1	TRCN0000316636	Phgdh	236539	10090	1.1616e+08	15500440	12312200	12093440	12517720	13906320	12305580	0.884891	13105950	1.13275
	DAS44	E	5	NM_016966.2-259s1c1	TRCN0000041626	Phgdh	236539	10090	6.048e+07	16745240	17566880	13395800	17025440	17156060	15210620	0.886603	16183340	1.39873
	DAS37	F	3	NM_009344.3-1444s21c1	TRCN0000295139	Phlda1	21664	10090	1.3728e+08	12386880	10213640	10413840	9156320	11300260	9785080	0.865916	10542670	0.706218
	DAS37	G	11	NM_009344.3-832s21c1	TRCN0000295138	Phlda1	21664	10090	1.3728e+08	13891120	9011080	11978920	11596040	11451100	11787480	1.02938	11619290	0.778337
	DAS37	B	9	NM_009344.1-662s1c1	TRCN0000054486	Phlda1	21664	10090	1.3728e+08	15133600	13143160	13946800	12714120	14138380	13330460	0.942856	13734420	0.920022
	DAS37	F	12	NM_009344.1-873s1c1	TRCN0000054485	Phlda1	21664	10090	1.3728e+08	16943040	16785520	14115520	14321640	16864280	14218580	0.843118	15541430	1.04107
	DAS37	C	1	NM_009344.1-920s1c1	TRCN0000054483	Phlda1	21664	10090	8.352e+07	21137760	21575960	20367800	20468880	21356860	20418340	0.956055	20887600	1.39919
	DAS44	B	4	NM_011495.2-352s21c1	TRCN0000322099	Plk4	20873	10090	1.3536e+08	2740760	5484720	792160	1214640	4112740	1003400	0.243974	2558070	0.221094
	DAS44	F	7	NM_011495.2-3084s21c1	TRCN0000322034	Plk4	20873	10090	1.3728e+08	7984000	4721000	6532560	4990120	6352500	5761340	0.906941	6056920	0.5235
	DAS44	A	5	NM_011495.1-906s1c1	TRCN0000025678	Plk4	20873	10090	4.992e+07	7048280	8861480	5976360	7039880	7954880	6508120	0.818129	7231500	0.625019
	DAS44	A	12	NM_011495.2-2255s21c1	TRCN0000322097	Plk4	20873	10090	1.3536e+08	7689560	8141480	7502520	8796200	7915520	8149360	1.02954	8032440	0.694245
	DAS44	H	8	NM_011495.1-2084s1c1	TRCN0000025677	Plk4	20873	10090	4.992e+07	12080200	8439880	7530200	5648520	10260040	6589360	0.642235	8424700	0.728148
	DAS42	A	7	NM_133692.2-142s21c1	TRCN0000279479	Pold3	67967	10090	1.056e+08	152120	136440	26000	97960	144280	61980	0.429581	103130	0.0139526
	DAS42	E	12	NM_133692.1-1212s1c1	TRCN0000174991	Pold3	67967	10090	7.488e+07	2795560	906120	198520	758080	1850840	478300	0.258423	1164570	0.157556
	DAS42	E	4	NM_133692.2-383s21c1	TRCN0000279480	Pold3	67967	10090	1.3728e+08	31680	5300480	3960	1205840	2666080	604900	0.226887	1635490	0.221268
	DAS42	C	8	NM_133692.2-530s21c1	TRCN0000279476	Pold3	67967	10090	1.3728e+08	4712560	4787560	121080	5054920	4750060	2588000	0.544835	3669030	0.496389
	DAS42	F	7	NM_133692.2-426s21c1	TRCN0000279477	Pold3	67967	10090	1.3728e+08	7121240	7477840	55880	6310240	7299540	3183060	0.436063	5241300	0.709103
	DAS42	E	6	NM_145150.2-2142s21c1	TRCN0000352509	Prc1	233406	10090	8.352e+07	211200	1132680	12960	1254160	671940	633560	0.942882	652750	0.0883115
	DAS42	E	9	NM_145150.2-1835s21c1	TRCN0000340564	Prc1	233406	10090	1.3728e+08	1489880	1486000	938240	538880	1487940	738560	0.496364	1113250	0.150613
	DAS42	H	1	NM_145150.2-2793s21c1	TRCN0000340488	Prc1	233406	10090	1.3536e+08	508280	7694960	1880	6220720	4101620	3111300	0.758554	3606460	0.487923
	DAS42	E	2	NM_145150.1-1068s1c1	TRCN0000219540	Prc1	233406	10090	4.128e+07	56520	10104680	2280	8820280	5080600	4411280	0.86826	4745940	0.642085
	DAS42	B	10	NM_145150.2-171s21c1	TRCN0000340487	Prc1	233406	10090	17280000	6775280	7214000	19360	5270000	6994640	2644680	0.378101	4819660	0.652059
	DAS39	D	9	NM_008922.1-1153s1c1	TRCN0000111469	Prim2	19076	10090	7.392e+07	11317000	5981400	2224880	5009560	8649200	3617220	0.418214	6133210	0.353164
	DAS39	A	1	NM_008922.1-790s1c1	TRCN0000111466	Prim2	19076	10090	7.488e+07	10549040	7865960	3084800	4398040	9207500	3741420	0.406345	6474460	0.372814
	DAS39	H	4	NM_008922.1-1233s21c1	TRCN0000326544	Prim2	19076	10090	9.12e+07	13015760	8028920	3773480	4033880	10522340	3903680	0.37099	7213010	0.415342
	DAS39	B	10	NM_008922.1-1128s1c1	TRCN0000111467	Prim2	19076	10090	1.1328e+08	24474480	18304280	10042680	18719680	21389380	14381180	0.672351	17885280	1.02988
	DAS39	G	12	NM_008922.1-1711s1c1	TRCN0000111465	Prim2	19076	10090	122880000	24175240	22137360	23093480	22366880	23156300	22730180	0.981598	22943240	1.32112
	DAS44	D	4	NM_008926.4-1261s21c1	TRCN0000361374	Prkg2	19092	10090	1.0848e+08	2478040	599520	634960	955840	1538780	795400	0.516903	1167090	0.100872
	DAS44	E	4	NM_008926.4-2267s21c1	TRCN0000361437	Prkg2	19092	10090	1.3728e+08	2839280	2503880	1106720	1814800	2671580	1460760	0.546778	2066170	0.178579
	DAS44	B	12	NM_008926.2-1274s1c1	TRCN0000022716	Prkg2	19092	10090	7.392e+07	14241160	14540960	14527280	14668920	14391060	14598100	1.01439	14494580	1.25277
	DAS44	C	2	NM_008926.4-1297s21c1	TRCN0000361375	Prkg2	19092	10090	1.3728e+08	12801440	14953120	16257000	15346080	13877280	15801540	1.13866	14839410	1.28257
	DAS44	H	6	NM_008926.2-1710s1c1	TRCN0000022717	Prkg2	19092	10090	2.592e+07	14607040	17942320	17615320	17035400	16274680	17325360	1.06456	16800020	1.45203
	DAS43	H	6	NM_177420.1-775s1c1	TRCN0000120420	Psat1	107272	10090	8.544e+07	4690960	6738280	3288560	2148800	5714620	2718680	0.475741	4216650	0.435543
	DAS43	C	1	NM_177420.1-474s1c1	TRCN0000120419	Psat1	107272	10090	7.104e+07	3104560	7310400	3255280	3252360	5207480	3253820	0.624836	4230650	0.436989
	DAS43	A	12	NM_177420.1-1695s21c1	TRCN0000363952	Psat1	107272	10090	1.2192e+08	4988440	6147760	6798360	6118560	5568100	6458460	1.1599	6013280	0.621119
	DAS43	B	3	NM_177420.1-156s1c1	TRCN0000120421	Psat1	107272	10090	1.3536e+08	7813640	9209680	6574120	7689280	8511660	7131700	0.837874	7821680	0.80791
	DAS37	G	6	NM_022415.3-370s21c1	TRCN0000366736	Ptges	64292	10090	1.3728e+08	7706720	3607720	4058640	4791840	5657220	4425240	0.782229	5041230	0.337695
	DAS37	F	6	NM_022415.3-892s21c1	TRCN0000375552	Ptges	64292	10090	1.3728e+08	7932200	8342880	8808840	6894000	8137540	7851420	0.964839	7994480	0.535523
	DAS37	D	9	NM_022415.3-299s21c1	TRCN0000366670	Ptges	64292	10090	1.3728e+08	10071400	8652520	8591320	5154680	9361960	6873000	0.734141	8117480	0.543762
	DAS37	B	10	NM_022415.3-335s21c1	TRCN0000366739	Ptges	64292	10090	1.3728e+08	11911240	9900600	11656760	7398080	10905920	9527420	0.873601	10216670	0.68438
	DAS37	F	2	NM_022415.3-855s21c1	TRCN0000366738	Ptges	64292	10090	1.3728e+08	14258600	12696840	11005040	10757560	13477720	10881300	0.807355	12179510	0.815864
	DAS45	H	2	NM_008969.3-1190s21c1	TRCN0000334227	Ptgs1	19224	10090	1.3728e+08	1584000	3971640	1541520	388680	2777820	965100	0.347431	1871460	0.219494
	DAS45	C	9	NM_008969.1-196s1c1	TRCN0000067902	Ptgs1	19224	10090	1.3728e+08	4210360	3205640	2507160	4049200	3708000	3278180	0.884083	3493090	0.409687
	DAS45	H	6	NM_008969.1-475s1c1	TRCN0000067899	Ptgs1	19224	10090	7.008e+07	9876000	8968760	9410360	9039160	9422380	9224760	0.979027	9323570	1.09352
	DAS45	H	1	NM_008969.3-1051s21c1	TRCN0000334293	Ptgs1	19224	10090	1.3728e+08	10201320	10714640	11327000	7667520	10457980	9497260	0.908135	9977620	1.17023
	DAS45	H	4	NM_008969.3-2205s21c1	TRCN0000348237	Ptgs1	19224	10090	1.3728e+08	7741280	13603360	10899560	10100560	10672320	10500060	0.983859	10586190	1.2416
	DAS41	G	6	NM_172498.3-1927s21c1	TRCN0000361441	Ptk2b	19229	10090	1.3728e+08	4385560	5136160	3048040	2719240	4760860	2883640	0.605697	3822250	0.35247
	DAS41	E	4	NM_172498.3-2562s21c1	TRCN0000361379	Ptk2b	19229	10090	1.3728e+08	6267160	4846800	4107960	3915760	5556980	4011860	0.72195	4784420	0.441197
	DAS41	B	3	NM_172498.3-1740s21c1	TRCN0000361378	Ptk2b	19229	10090	1.3728e+08	6722480	6429200	4771240	6108800	6575840	5440020	0.827274	6007930	0.554023
	DAS41	C	11	NM_172498.3-1708s21c1	TRCN0000361440	Ptk2b	19229	10090	1.3728e+08	9665240	8419440	8531280	11604920	9042340	10068100	1.11344	9555220	0.881138
	DAS41	B	10	NM_172498.1-2242s1c1	TRCN0000023631	Ptk2b	19229	10090	6.24e+07	13509920	9833680	10207160	11947320	11671800	11077240	0.94906	11374520	1.04891
	DAS43	D	12	NM_008981.1-1155s1c1	TRCN0000029952	Ptprg	19270	10090	1.2672e+08	1391160	2438400	345760	417400	1914780	381580	0.199281	1148180	0.118597
	DAS43	C	10	NM_008981.1-4084s1c1	TRCN0000029953	Ptprg	19270	10090	1.3728e+08	1345400	5512840	2777400	2033720	3429120	2405560	0.701509	2917340	0.301335
	DAS43	C	2	NM_008981.1-3200s1c1	TRCN0000029950	Ptprg	19270	10090	1.3728e+08	8156120	10209880	7665080	6152520	9183000	6908800	0.752347	8045900	0.83107
	DAS43	A	9	NM_008981.1-2712s1c1	TRCN0000029951	Ptprg	19270	10090	1.3728e+08	6636400	9643520	11250440	10654320	8139960	10952380	1.34551	9546170	0.986035
	DAS43	H	1	NM_008981.3-4279s21c1	TRCN0000314415	Ptprg	19270	10090	1.3344e+08	6887640	15991680	10565240	6708600	11439660	8636920	0.754998	10038290	1.03687
	DAS41	C	6	NM_009015.2-806s1c1	TRCN0000012214	Rad54l	19366	10090	122880000	1235640	1581400	430880	581600	1408520	506240	0.359413	957380	0.0882851
	DAS41	E	6	NM_009015.3-2171s21c1	TRCN0000273787	Rad54l	19366	10090	1.3728e+08	1859480	1585120	1560120	3083960	1722300	2322040	1.34822	2022170	0.186475
	DAS41	D	9	NM_009015.3-1673s21c1	TRCN0000281997	Rad54l	19366	10090	1.3728e+08	4781200	4109040	3893240	2503840	4445120	3198540	0.719562	3821830	0.352431
	DAS41	G	2	NM_009015.3-2876s21c1	TRCN0000273738	Rad54l	19366	10090	1.3728e+08	415840	6966120	6061000	4391440	3690980	5226220	1.41594	4458600	0.411151
	DAS41	D	11	NM_009015.3-2069s21c1	TRCN0000273789	Rad54l	19366	10090	1.3728e+08	12401400	9930840	11754080	8994560	11166120	10374320	0.929089	10770220	0.99318
	DAS39	A	8	NM_030690.2-759s21c1	TRCN0000255951	Rai14	75646	10090	1.0272e+08	6574240	2934400	732120	746600	4754320	739360	0.155513	2746840	0.158169
	DAS39	F	6	NM_030690.2-4645s21c1	TRCN0000255953	Rai14	75646	10090	1.152e+08	12677640	8780400	4198600	6082640	10729020	5140620	0.479132	7934820	0.456905
	DAS39	E	4	NM_030690.2-834s21c1	TRCN0000255955	Rai14	75646	10090	1.3728e+08	14344760	12600640	9597600	12172000	13472700	10884800	0.807915	12178750	0.701281
	DAS39	G	10	NM_030690.2-1989s21c1	TRCN0000255952	Rai14	75646	10090	1.3728e+08	20949040	16120240	7180520	13950200	18534640	10565360	0.570033	14550000	0.837823
	DAS39	C	3	NM_030690.2-2068s21c1	TRCN0000255954	Rai14	75646	10090	1.3728e+08	20851760	18400120	13067560	18102680	19625940	15585120	0.794108	17605530	1.01377
	DAS44	D	10	NM_053268.2-2969s21c1	TRCN0000310898	Rasa2	114713	10090	1.1424e+08	3483480	579960	1219640	629360	2031720	924500	0.455033	1478110	0.127753
	DAS44	B	1	NM_053268.2-1174s21c1	TRCN0000304370	Rasa2	114713	10090	1.0272e+08	5746880	4267280	3272280	4158040	5007080	3715160	0.741981	4361120	0.376932
	DAS44	A	2	NM_053268.1-386s1c1	TRCN0000034350	Rasa2	114713	10090	8.448e+07	3355320	8248240	2929040	2971360	5801780	2950200	0.508499	4375990	0.378217
	DAS44	G	12	NM_053268.1-177s1c1	TRCN0000034349	Rasa2	114713	10090	1.0176e+08	7606320	6543240	6118280	6724960	7074780	6421620	0.907678	6748200	0.583248
	DAS44	C	3	NM_053268.1-1304s1c1	TRCN0000034351	Rasa2	114713	10090	7.296e+07	9997240	8414680	8673640	7723680	9205960	8198660	0.890582	8702310	0.752142
	DAS44	F	5	NM_001081223.1-2253s21c1	TRCN0000305310	Rbbp8	225182	10090	1.3728e+08	3753480	3318880	1448520	1713800	3536180	1581160	0.447138	2558670	0.221146
	DAS44	H	3	NM_001081223.1-1772s21c1	TRCN0000305311	Rbbp8	225182	10090	9.312e+07	3469480	5780680	644120	627600	4625080	635860	0.137481	2630470	0.227352
	DAS44	D	8	XM_358326.1-488s1c1	TRCN0000088050	Rbbp8	225182	10090	122880000	2441800	3616840	3239960	2291240	3029320	2765600	0.912944	2897460	0.250428
	DAS44	G	5	XM_358326.1-429s1c1	TRCN0000088051	Rbbp8	225182	10090	1.2384e+08	5320800	6015240	3926400	3009240	5668020	3467820	0.611822	4567920	0.394806
	DAS44	E	1	NM_001081223.1-555s21c1	TRCN0000305376	Rbbp8	225182	10090	1.3728e+08	4224520	7358400	4021120	4892760	5791460	4456940	0.769571	5124200	0.442885
	DAS40	G	7	NM_011254.3-2441s1c1	TRCN0000105545	Rbp1	19659	10090	1.3728e+08	1600320	4689080	1514960	848920	3144700	1181940	0.375851	2163320	0.200062
	DAS40	G	3	NM_011254.3-2389s1c1	TRCN0000105549	Rbp1	19659	10090	1.3728e+08	5044760	9241040	4757800	4279760	7142900	4518780	0.632625	5830840	0.539232
	DAS40	A	7	NM_011254.3-2191s1c1	TRCN0000105546	Rbp1	19659	10090	8.928e+07	6814400	13060440	6491440	5896880	9937420	6194160	0.623317	8065790	0.745919
	DAS40	G	12	NM_011254.3-2231s1c1	TRCN0000105548	Rbp1	19659	10090	9.504e+07	9131400	14685680	11445360	8925240	11908540	10185300	0.855294	11046920	1.02161
	DAS40	B	3	NM_011254.3-2055s1c1	TRCN0000105547	Rbp1	19659	10090	9.408e+07	9568000	14820760	12769280	8929960	12194380	10849620	0.889723	11522000	1.06555
	DAS41	C	9	NM_021557.5-903s21c1	TRCN0000294909	Rdh11	17252	10090	1.3344e+08	5775840	1419760	1041080	953200	3597800	997140	0.277153	2297470	0.211862
	DAS41	A	3	NM_021557.2-794s1c1	TRCN0000041778	Rdh11	17252	10090	1.0176e+08	3678200	5185720	1053040	2527160	4431960	1790100	0.403907	3111030	0.286885
	DAS41	F	1	NM_021557.5-382s21c1	TRCN0000294911	Rdh11	17252	10090	1.3728e+08	6376080	8469840	5483760	4107080	7422960	4795420	0.646025	6109190	0.563361
	DAS41	D	2	NM_021557.2-1222s1c1	TRCN0000041782	Rdh11	17252	10090	1.3728e+08	11062960	9842960	8099360	9100600	10452960	8599980	0.822732	9526470	0.878487
	DAS41	H	2	NM_021557.2-998s1c1	TRCN0000041780	Rdh11	17252	10090	5.568e+07	60680	19386200	18601720	15208480	9723440	16905100	1.73859	13314270	1.22778
	DAS39	E	11	NM_026446.3-296s21c1	TRCN0000377128	Rgs19	56470	10090	1.3728e+08	14408320	8549160	2597080	3012520	11478740	2804800	0.244347	7141770	0.41124
	DAS39	H	7	NM_026446.3-994s21c1	TRCN0000366650	Rgs19	56470	10090	1.3728e+08	19918400	12530640	5888240	13516600	16224520	9702420	0.59801	12963470	0.746467
	DAS39	G	5	NM_026446.3-694s21c1	TRCN0000377127	Rgs19	56470	10090	1.3728e+08	20299480	19685040	19297360	18768400	19992260	19032880	0.952012	19512570	1.12358
	DAS39	A	3	NM_026446.3-860s21c1	TRCN0000377063	Rgs19	56470	10090	1.2384e+08	23441400	20721240	20643800	22070960	22081320	21357380	0.967215	21719350	1.25065
	DAS39	E	12	NM_026446.3-484s21c1	TRCN0000376795	Rgs19	56470	10090	1.3728e+08	33675080	24932800	15142240	27589400	29303940	21365820	0.729111	25334880	1.45884
	DAS43	G	7	NM_009821.1-1914s1c1	TRCN0000084809	Runx1	12394	10090	1.3728e+08	321600	860800	359640	770560	591200	565100	0.955853	578150	0.0597178
	DAS43	F	2	NM_009821.2-6025s21c1	TRCN0000218119	Runx1	12394	10090	1.3728e+08	2503120	3942120	1975960	2702960	3222620	2339460	0.72595	2781040	0.287257
	DAS43	F	6	NM_009821.1-2053s1c1	TRCN0000084812	Runx1	12394	10090	1.2672e+08	3643400	5050800	2189360	824920	4347100	1507140	0.3467	2927120	0.302346
	DAS43	G	9	NM_009821.1-2027s1c1	TRCN0000084811	Runx1	12394	10090	7.872e+07	3306360	4748840	3366200	4508480	4027600	3937340	0.97759	3982470	0.411354
	DAS43	A	6	NM_009821.1-2497s1c1	TRCN0000084810	Runx1	12394	10090	1.0848e+08	3166640	6588760	5213840	3385760	4877700	4299800	0.881522	4588750	0.473977
	DAS44	F	9	NM_025436.1-1284s1c1	TRCN0000076628	Sc4mol	66234	10090	53760000	6056720	4858360	3180880	3590720	5457540	3385800	0.620389	4421670	0.382165
	DAS44	G	2	NM_025436.2-306s21c1	TRCN0000306155	Sc4mol	66234	10090	107520000	5422160	7490120	2686800	2298960	6456140	2492880	0.386125	4474510	0.386732
	DAS44	B	11	NM_025436.2-437s21c1	TRCN0000306154	Sc4mol	66234	10090	1.3728e+08	6574960	4205080	5633880	5468440	5390020	5551160	1.0299	5470590	0.472824
	DAS44	A	1	NM_025436.2-497s21c1	TRCN0000354091	Sc4mol	66234	10090	1.3728e+08	7245400	12579240	8391720	1266760	9912320	4829240	0.487196	7370780	0.637057
	DAS44	E	7	NM_025436.1-276s1c1	TRCN0000076632	Sc4mol	66234	10090	8.832e+07	19037120	17931320	19646440	19303560	18484220	19475000	1.0536	18979610	1.64041
	DAS43	A	3	NM_011519.1-792s1c1	TRCN0000072001	Sdc1	20969	10090	1.3728e+08	2827400	1272560	812040	869840	2049980	840940	0.410219	1445460	0.149303
	DAS43	E	12	NM_011519.2-304s21c1	TRCN0000302269	Sdc1	20969	10090	8.736e+07	844000	4288400	1282560	1033720	2566200	1158140	0.451305	1862170	0.192346
	DAS43	A	8	NM_011519.2-1503s21c1	TRCN0000311084	Sdc1	20969	10090	1.2864e+08	4301440	3938160	5964400	8901880	4119800	7433140	1.80425	5776470	0.596658
	DAS43	G	8	NM_011519.1-1072s1c1	TRCN0000072002	Sdc1	20969	10090	9.216e+07	5622520	7821760	6970160	5058480	6722140	6014320	0.894703	6368230	0.657782
	DAS43	H	7	NM_011519.1-865s1c1	TRCN0000071999	Sdc1	20969	10090	6.72e+07	12570240	13158840	13658560	13380560	12864540	13519560	1.05092	13192050	1.36262
	DAS38	E	6	NM_008304.2-1584s21c1	TRCN0000312853	Sdc2	15529	10090	1.3728e+08	10126600	12435480	11793280	10661160	11281040	11227220	0.995229	11254130	0.630713
	DAS38	H	1	NM_008304.1-641s1c1	TRCN0000071563	Sdc2	15529	10090	1.3728e+08	11142200	12231960	11529720	11072120	11687080	11300920	0.966958	11494000	0.644156
	DAS38	D	7	NM_008304.1-595s1c1	TRCN0000071566	Sdc2	15529	10090	1.3728e+08	14982960	17446600	13916080	9369160	16214780	11642620	0.718025	13928700	0.780603
	DAS38	F	1	NM_008304.2-919s21c1	TRCN0000349353	Sdc2	15529	10090	1.3728e+08	13789520	13999840	15096680	14026800	13894680	14561740	1.04801	14228210	0.797388
	DAS38	F	6	NM_008304.2-990s21c1	TRCN0000377150	Sdc2	15529	10090	1.3728e+08	13581000	17284280	16776440	16145240	15432640	16460840	1.06663	15946740	0.8937
	DAS36	E	11	NM_080559.1-283s21c1	TRCN0000251022	Sh3bgrl3	73723	10090	1.3728e+08	5218600	8795720	2385320	3668520	7007160	3026920	0.431975	5017040	0.305495
	DAS36	E	3	NM_080559.1-175s21c1	TRCN0000251024	Sh3bgrl3	73723	10090	1.2672e+08	3164800	10717480	3304480	3276800	6941140	3290640	0.474078	5115890	0.311514
	DAS36	D	10	NM_080559.1-219s21c1	TRCN0000258126	Sh3bgrl3	73723	10090	9.888e+07	11821760	13482040	10496320	9936560	12651900	10216440	0.807502	11434170	0.696243
	DAS36	D	2	NM_080559.1-306s21c1	TRCN0000251023	Sh3bgrl3	73723	10090	9.216e+07	14933920	16200480	13221760	13872640	15567200	13547200	0.87024	14557200	0.886408
	DAS36	H	3	NM_080559.1-424s21c1	TRCN0000251021	Sh3bgrl3	73723	10090	1.3728e+08	20204400	24237000	24074720	25593480	22220700	24834100	1.11761	23527400	1.43262
	DAS43	D	10	NM_011369.2-2063s21c1	TRCN0000248579	Shcbp1	20419	10090	1.3728e+08	430560	376240	528840	743480	403400	636160	1.577	519780	0.0536887
	DAS43	D	9	NM_011369.2-722s21c1	TRCN0000248580	Shcbp1	20419	10090	1.2192e+08	1960800	1291480	1501040	400880	1626140	950960	0.584796	1288550	0.133096
	DAS43	F	9	NM_011369.2-144s1c1	TRCN0000216295	Shcbp1	20419	10090	4.992e+07	2753240	4302680	945320	1430240	3527960	1187780	0.336676	2357870	0.243547
	DAS43	A	7	NM_011369.2-1112s21c1	TRCN0000248578	Shcbp1	20419	10090	1.1904e+08	2276640	5600680	4678920	5201680	3938660	4940300	1.25431	4439480	0.458559
	DAS43	B	2	NM_011369.2-852s21c1	TRCN0000248577	Shcbp1	20419	10090	1.3728e+08	8938080	10342280	8466440	10889160	9640180	9677800	1.0039	9658990	0.997688
	DAS38	G	11	NM_028818.1-1119s1c1	TRCN0000106039	Sipa1l3	74206	10090	1.3728e+08	7605120	9178520	7073920	5038520	8391820	6056220	0.721681	7224020	0.404854
	DAS38	B	1	NM_028818.1-932s1c1	TRCN0000106037	Sipa1l3	74206	10090	1.3728e+08	14093640	12511840	9674760	10033120	13302740	9853940	0.740745	11578340	0.648882
	DAS38	B	2	NM_028818.1-1122s1c1	TRCN0000106038	Sipa1l3	74206	10090	1.3728e+08	15224560	17752160	15726520	16639360	16488360	16182940	0.981477	16335650	0.915495
	DAS38	B	4	NM_028818.1-3363s1c1	TRCN0000106035	Sipa1l3	74206	10090	1.3728e+08	19819240	23085840	24976560	23948640	21452540	24462600	1.14031	22957570	1.28661
	DAS38	C	8	NM_028818.1-592s1c1	TRCN0000106036	Sipa1l3	74206	10090	1.3728e+08	24607200	27692320	27987800	28438720	26149760	28213260	1.07891	27181510	1.52333
	DAS41	D	5	NM_013787.2-2834s21c1	TRCN0000302319	Skp2	27401	10090	1.3728e+08	3178600	3194960	1577800	1113360	3186780	1345580	0.422238	2266180	0.208977
	DAS41	G	11	NM_013787.2-1201s21c1	TRCN0000302321	Skp2	27401	10090	1.3728e+08	1755360	4244120	1967080	1585280	2999740	1776180	0.592111	2387960	0.220207
	DAS41	C	3	NM_013787.2-821s1c1	TRCN0000088762	Skp2	27401	10090	1.3728e+08	5592480	5376560	6023360	4738440	5484520	5380900	0.981107	5432710	0.500979
	DAS41	F	3	NM_013787.2-340s21c2	TRCN0000302320	Skp2	27401	10090	1.3728e+08	13682840	12152920	10443840	9258960	12917880	9851400	0.762617	11384640	1.04984
	DAS41	H	4	NM_013787.2-1418s21c1	TRCN0000302380	Skp2	27401	10090	1.3728e+08	12553080	13971720	12588360	12037960	13262400	12313160	0.928426	12787780	1.17923
	DAS41	C	5	NM_015747.2-997s21c1	TRCN0000313521	Slc20a1	20515	10090	1.3728e+08	2747640	1533560	2349760	4350360	2140600	3350060	1.56501	2745330	0.253162
	DAS41	F	6	NM_015747.2-2925s21c1	TRCN0000313522	Slc20a1	20515	10090	1.3728e+08	5147440	4631840	4916160	3772000	4889640	4344080	0.888425	4616860	0.425745
	DAS41	E	1	NM_015747.2-1836s21c1	TRCN0000313451	Slc20a1	20515	10090	1.3728e+08	6301720	4345880	4578920	4596760	5323800	4587840	0.86176	4955820	0.457003
	DAS41	B	7	NM_015747.2-2494s21c1	TRCN0000317074	Slc20a1	20515	10090	1.2384e+08	7911480	7803160	5610400	9674720	7857320	7642560	0.972668	7749940	0.714663
	DAS41	D	1	NM_015747.1-864s1c1	TRCN0000068404	Slc20a1	20515	10090	1.2768e+08	16147040	13676480	16168840	16899960	14911760	16534400	1.10882	15723080	1.44991
	DAS40	C	8	NM_172685.1-847s1c1	TRCN0000068314	Slc25a24	229731	10090	7.104e+07	2358960	6978640	4183040	2229920	4668800	3206480	0.686789	3937640	0.36415
	DAS40	A	1	NM_172685.1-1026s1c1	TRCN0000068316	Slc25a24	229731	10090	1.2864e+08	3780880	7047480	3190600	1786000	5414180	2488300	0.459589	3951240	0.365408
	DAS40	E	9	NM_172685.1-1096s1c1	TRCN0000068313	Slc25a24	229731	10090	1.3728e+08	3130960	11344200	6173000	3083720	7237580	4628360	0.63949	5932970	0.548677
	DAS40	C	7	NM_172685.1-531s1c1	TRCN0000068315	Slc25a24	229731	10090	1.3728e+08	11413200	14605040	13421880	13216560	13009120	13319220	1.02384	13164170	1.21741
	DAS40	E	5	NM_172685.1-352s1c1	TRCN0000068317	Slc25a24	229731	10090	1.0368e+08	13822840	17941080	16942320	16393040	15881960	16667680	1.04947	16274820	1.50508
	DAS39	C	1	NM_011400.1-438s1c1	TRCN0000079330	Slc2a1	20525	10090	69120000	8972320	3708240	1005200	2714680	6340280	1859940	0.293353	4100110	0.236094
	DAS39	C	2	NM_011400.1-267s1c1	TRCN0000079329	Slc2a1	20525	10090	1.3728e+08	10789080	6112560	2471360	6510120	8450820	4490740	0.531397	6470780	0.372603
	DAS39	H	1	NM_011400.1-2356s1c1	TRCN0000079328	Slc2a1	20525	10090	1.3056e+08	13944360	10933680	7291640	9906520	12439020	8599080	0.691299	10519050	0.605711
	DAS39	C	7	NM_011400.3-330s21c1	TRCN0000305719	Slc2a1	20525	10090	1.3728e+08	17119400	11212000	7748040	12171280	14165700	9959660	0.703083	12062680	0.694597
	DAS39	D	12	NM_011400.3-1361s21c1	TRCN0000311403	Slc2a1	20525	10090	4.032e+07	24784280	21523120	18975440	22846200	23153700	20910820	0.903131	22032260	1.26867
	DAS45	A	3	NM_139143.1-2997s1c1	TRCN0000079618	Slc39a6	106957	10090	1.152e+08	3113360	4744200	1888120	3877120	3928780	2882620	0.733719	3405700	0.399438
	DAS45	F	6	NM_139143.3-2689s21c1	TRCN0000308539	Slc39a6	106957	10090	1.3728e+08	6689560	5303480	5066400	6822680	5996520	5944540	0.991332	5970530	0.700254
	DAS45	F	11	NM_139143.1-827s1c1	TRCN0000079619	Slc39a6	106957	10090	1.2384e+08	10880640	10543240	9571080	9125160	10711940	9348120	0.872682	10030030	1.17637
	DAS45	G	10	NM_139143.3-1405s21c1	TRCN0000308540	Slc39a6	106957	10090	107520000	10474320	11041040	9725000	12360760	10757680	11042880	1.02651	10900280	1.27844
	DAS45	H	7	NM_139143.1-992s1c1	TRCN0000079621	Slc39a6	106957	10090	69120000	12420960	11731240	13081320	12670760	12076100	12876040	1.06624	12476070	1.46326
	DAS45	B	10	NM_017391.1-1603s1c1	TRCN0000070090	Slc5a3	53881	10090	1.104e+08	2664240	5372040	2057880	2767880	4018140	2412880	0.600497	3215510	0.377131
	DAS45	D	3	NM_017391.3-2032s21c1	TRCN0000328431	Slc5a3	53881	10090	1.3728e+08	6361680	5493440	1272000	1570040	5927560	1421020	0.239731	3674290	0.430939
	DAS45	H	5	NM_017391.1-587s1c1	TRCN0000070088	Slc5a3	53881	10090	1.3152e+08	7077200	6649640	7594280	9685080	6863420	8639680	1.2588	7751550	0.909141
	DAS45	D	7	NM_017391.1-1879s1c1	TRCN0000070092	Slc5a3	53881	10090	1.3728e+08	10164960	8598160	5268760	8362960	9381560	6815860	0.726517	8098710	0.949857
	DAS45	E	1	NM_017391.3-1082s21c1	TRCN0000328430	Slc5a3	53881	10090	1.3728e+08	9732720	11900400	8475320	10578400	10816560	9526860	0.880766	10171710	1.19299
	DAS41	E	7	NM_008017.3-1888s21c1	TRCN0000302869	Smc2	14211	10090	1.3728e+08	6314720	4807000	2710640	4330080	5560860	3520360	0.63306	4540610	0.418714
	DAS41	D	12	NM_008017.3-3358s1c1	TRCN0000108953	Smc2	14211	10090	7.968e+07	9437600	4960040	8440440	6594360	7198820	7517400	1.04425	7358110	0.678531
	DAS41	E	9	NM_008017.3-1418s1c1	TRCN0000108954	Smc2	14211	10090	1.2672e+08	7740560	9946800	7875320	5989720	8843680	6932520	0.783895	7888100	0.727404
	DAS41	B	4	NM_008017.3-5068s1c1	TRCN0000108950	Smc2	14211	10090	1.0368e+08	9421240	9022240	6492080	8188760	9221740	7340420	0.795991	8281080	0.763643
	DAS41	D	7	NM_008017.3-616s1c1	TRCN0000108951	Smc2	14211	10090	1.3728e+08	10517880	7017400	5441760	10745640	8767640	8093700	0.923133	8430670	0.777437
	DAS38	D	10	NM_011415.2-1185s21c1	TRCN0000350023	Snai2	20583	10090	1.3728e+08	7434040	6791440	6924720	6255720	7112740	6590220	0.926537	6851480	0.383976
	DAS38	G	4	NM_011415.2-265s21c1	TRCN0000350022	Snai2	20583	10090	1.3728e+08	6258760	6573040	8289760	9088080	6415900	8688920	1.35428	7552410	0.423258
	DAS38	B	8	NM_011415.2-276s1c1	TRCN0000096225	Snai2	20583	10090	1.3728e+08	11668760	12745680	9517320	9742240	12207220	9629780	0.788859	10918500	0.611903
	DAS38	C	7	NM_011415.2-814s21c1	TRCN0000317660	Snai2	20583	10090	1.3728e+08	14609080	17153760	16959560	12434400	15881420	14696980	0.92542	15289200	0.856849
	DAS38	D	5	NM_011415.2-212s21c1	TRCN0000319552	Snai2	20583	10090	1.3728e+08	15533000	17334560	16990800	18412720	16433780	17701760	1.07716	17067770	0.956525
	DAS44	C	12	NM_019654.2-1313s1c1	TRCN0000105753	Socs5	56468	10090	107520000	3428040	1942800	776600	1327800	2685420	1052200	0.39182	1868810	0.161521
	DAS44	D	2	NM_019654.2-1286s21c1	TRCN0000349191	Socs5	56468	10090	1.3728e+08	6752280	4455320	3873880	3843240	5603800	3858560	0.688561	4731180	0.408916
	DAS44	A	4	NM_019654.2-517s1c1	TRCN0000105752	Socs5	56468	10090	1.3728e+08	5667880	10586000	5984720	5230600	8126940	5607660	0.690009	6867300	0.593542
	DAS44	A	3	NM_019654.2-1846s21c1	TRCN0000305116	Socs5	56468	10090	8.256e+07	6205560	10951080	8293040	10630840	8578320	9461940	1.10301	9020130	0.779611
	DAS44	D	3	NM_019654.2-1415s1c1	TRCN0000105754	Socs5	56468	10090	1.056e+08	11282200	11656440	9863320	11698200	11469320	10780760	0.939965	11125040	0.961539
	DAS43	F	10	NM_009234.1-1092s1c1	TRCN0000012099	Sox11	20666	10090	7.968e+07	1410120	1762400	410480	656400	1586260	533440	0.336288	1059850	0.109473
	DAS43	F	11	NM_009234.1-1331s1c1	TRCN0000012100	Sox11	20666	10090	7.296e+07	2772240	5600840	1325360	1938120	4186540	1631740	0.389759	2909140	0.300488
	DAS43	B	9	NM_009234.6-1476s21c1	TRCN0000365907	Sox11	20666	10090	1.296e+08	7327680	6214560	6527600	6590720	6771120	6559160	0.968696	6665140	0.68845
	DAS43	B	1	NM_009234.1-1239s1c1	TRCN0000012102	Sox11	20666	10090	9.504e+07	7638600	9246600	9294400	7329760	8442600	8312080	0.98454	8377340	0.865305
	DAS43	F	5	NM_009234.1-2499s1c1	TRCN0000012098	Sox11	20666	10090	1.3728e+08	11979320	12940880	11333680	13727200	12460100	12530440	1.00565	12495270	1.29065
	DAS37	C	7	NM_011448.2-1744s1c1	TRCN0000086167	Sox9	20682	10090	1.3728e+08	6196040	4977440	4191240	4069400	5586740	4130320	0.739308	4858530	0.325456
	DAS37	G	10	NM_011448.2-944s1c1	TRCN0000086165	Sox9	20682	10090	1.2672e+08	11908000	10650400	10171720	9158320	11279200	9665020	0.856889	10472110	0.701491
	DAS37	A	12	NM_011448.2-1231s1c1	TRCN0000086164	Sox9	20682	10090	1.3728e+08	15008000	16830760	16823560	14879080	15919380	15851320	0.995725	15885350	1.06411
	DAS37	H	5	NM_011448.4-1753s21c1	TRCN0000321420	Sox9	20682	10090	1.3728e+08	16701640	17013000	15463480	15846560	16857320	15655020	0.928678	16256170	1.08895
	DAS37	B	3	NM_011448.4-959s21c1	TRCN0000321490	Sox9	20682	10090	15360000	24677640	24216880	17139560	18522160	24447260	17830860	0.72936	21139060	1.41603
	DAS45	A	7	NM_025565.1-160s1c1	TRCN0000120656	Spc25	66442	10090	7.2e+07	403240	555840	240880	246120	479540	243500	0.507778	361520	0.0424009
	DAS45	B	12	NM_025565.2-323s21c1	TRCN0000329346	Spc25	66442	10090	1.1808e+08	4589560	5773400	2389400	4975640	5181480	3682520	0.710708	4432000	0.519807
	DAS45	E	6	NM_025565.2-384s21c1	TRCN0000329347	Spc25	66442	10090	1.3728e+08	10538680	9039760	9989240	11163600	9789220	10576420	1.08041	10182820	1.19429
	DAS45	G	5	NM_025565.1-878s1c1	TRCN0000120652	Spc25	66442	10090	1.3728e+08	12443440	10787880	9587200	10588400	11615660	10087800	0.868466	10851730	1.27275
	DAS45	C	6	NM_025565.1-486s1c1	TRCN0000120653	Spc25	66442	10090	1.3728e+08	11709760	13328000	12006520	12344840	12518880	12175680	0.972585	12347280	1.44815
	DAS39	D	8	NM_009270.3-1738s21c1	TRCN0000327505	Sqle	20775	10090	1.0464e+08	20680920	7868200	4336880	7251560	14274560	5794220	0.405912	10034390	0.577803
	DAS39	B	6	NM_009270.3-1314s21c1	TRCN0000327590	Sqle	20775	10090	1.3728e+08	18149760	15127720	4071880	12073720	16638740	8072800	0.485181	12355770	0.711474
	DAS39	G	8	NM_009270.3-2566s21c1	TRCN0000327509	Sqle	20775	10090	1.3728e+08	14223000	13185960	9339800	12891520	13704480	11115660	0.811097	12410070	0.714601
	DAS39	H	2	NM_009270.3-2335s21c1	TRCN0000327591	Sqle	20775	10090	1.3728e+08	18469040	16678200	8927200	14848920	17573620	11888060	0.676472	14730840	0.848236
	DAS39	B	11	NM_009270.3-1465s21c1	TRCN0000327508	Sqle	20775	10090	1.3728e+08	23018760	17432000	11756640	19473720	20225380	15615180	0.772059	17920280	1.03189
	DAS39	E	10	NM_011570.2-570s1c1	TRCN0000099484	Tes	21753	10090	1.3728e+08	12024560	4342480	1298120	3703120	8183520	2500620	0.305568	5342070	0.307609
	DAS39	F	12	NM_011570.2-1488s1c1	TRCN0000099481	Tes	21753	10090	1.3728e+08	14055160	2904400	516840	4926920	8479780	2721880	0.320985	5600830	0.322509
	DAS39	G	3	NM_011570.2-1611s1c1	TRCN0000099482	Tes	21753	10090	1.3728e+08	11101600	7687040	5313840	4018000	9394320	4665920	0.496675	7030120	0.404811
	DAS39	F	9	NM_011570.2-631s1c1	TRCN0000099483	Tes	21753	10090	1.3728e+08	14550640	12610360	5555360	8249120	13580500	6902240	0.508246	10241370	0.589722
	DAS39	F	1	NM_011570.2-1893s1c1	TRCN0000099480	Tes	21753	10090	1.104e+08	20879760	17812400	10385160	16470120	19346080	13427640	0.694075	16386860	0.943593
	DAS40	F	7	NM_009365.2-2885s1c1	TRCN0000075518	Tgfb1i1	21804	10090	1.0944e+08	1419400	4686400	1119720	1171040	3052900	1145380	0.375178	2099140	0.194127
	DAS40	G	5	NM_009365.2-2145s1c1	TRCN0000075522	Tgfb1i1	21804	10090	8.736e+07	6578560	6816840	2910640	3534720	6697700	3222680	0.481162	4960190	0.458715
	DAS40	C	12	NM_009365.2-1573s1c1	TRCN0000075521	Tgfb1i1	21804	10090	5.952e+07	3676960	10108800	3907040	4072200	6892880	3989620	0.578803	5441250	0.503203
	DAS40	E	1	NM_009365.2-2571s1c1	TRCN0000075519	Tgfb1i1	21804	10090	1.2768e+08	5536480	7935600	6566360	3333840	6736040	4950100	0.734868	5843070	0.540363
	DAS40	G	1	NM_009365.2-1570s1c1	TRCN0000075520	Tgfb1i1	21804	10090	1.056e+08	5895400	10646440	8542320	4720280	8270920	6631300	0.801761	7451110	0.689073
	DAS45	F	12	NM_009372.2-911s21c1	TRCN0000233980	Tgif1	21815	10090	1.3728e+08	1646520	2055720	1206760	1955680	1851120	1581220	0.854196	1716170	0.201281
	DAS45	D	10	NM_009372.2-1080s21c1	TRCN0000233981	Tgif1	21815	10090	1.3728e+08	4963720	6302600	4614480	3860600	5633160	4237540	0.752249	4935350	0.578843
	DAS45	F	2	NM_009372.2-1195s21c1	TRCN0000218560	Tgif1	21815	10090	1.3728e+08	4935600	7687480	5057560	5656720	6311540	5357140	0.848785	5834340	0.684281
	DAS45	F	7	NM_009372.2-671s21c1	TRCN0000233979	Tgif1	21815	10090	1.3728e+08	6116160	7120240	7390640	9222640	6618200	8306640	1.25512	7462420	0.87523
	DAS45	G	3	NM_009372.2-632s1c1	TRCN0000055050	Tgif1	21815	10090	1.3728e+08	9910960	12300280	9236240	9680320	11105620	9458280	0.851666	10281950	1.20592
	DAS42	A	9	NM_011593.1-120s1c1	TRCN0000080038	Timp1	21857	10090	8.736e+07	750000	658360	41600	781280	704180	411440	0.584282	557810	0.0754669
	DAS42	F	10	NM_011593.2-706s21c1	TRCN0000414624	Timp1	21857	10090	1.0368e+08	169440	9980440	401320	7913480	5074940	4157400	0.819202	4616170	0.624528
	DAS42	G	2	NM_011593.1-470s1c1	TRCN0000080041	Timp1	21857	10090	1.3728e+08	897280	11243400	1920	11847840	6070340	5924880	0.976038	5997610	0.811426
	DAS42	D	9	NM_011593.1-167s1c1	TRCN0000080039	Timp1	21857	10090	1.008e+08	9399920	9055880	152280	8515080	9227900	4333680	0.469628	6780790	0.917383
	DAS42	E	11	NM_011593.1-36s1c1	TRCN0000080042	Timp1	21857	10090	107520000	12941400	12277520	151440	11689120	12609460	5920280	0.469511	9264870	1.25346
	DAS43	B	7	NM_021436.1-908s1c1	TRCN0000080494	Tmeff1	230157	10090	9.408e+07	1332680	1030440	643200	922640	1181560	782920	0.662616	982240	0.101457
	DAS43	F	7	NM_021436.1-549s1c1	TRCN0000080497	Tmeff1	230157	10090	1.0176e+08	2666160	5130200	2917240	2415440	3898180	2666340	0.683996	3282260	0.339028
	DAS43	B	8	NM_021436.1-1265s1c1	TRCN0000080495	Tmeff1	230157	10090	9.984e+07	2484320	4465800	4847600	3791040	3475060	4319320	1.24295	3897190	0.402545
	DAS43	D	1	NM_021436.1-1725s1c1	TRCN0000080493	Tmeff1	230157	10090	8.064e+07	5586120	6572640	4803160	3430560	6079380	4116860	0.677184	5098120	0.526591
	DAS43	F	3	NM_021436.1-1237s1c1	TRCN0000080496	Tmeff1	230157	10090	1.248e+08	12028360	14683880	10954200	10796400	13356120	10875300	0.814256	12115710	1.25145
	DAS42	B	4	NM_011607.2-6168s21c1	TRCN0000349876	Tnc	21923	10090	1.2e+08	389840	3362200	3920	1234240	1876020	619080	0.329996	1247550	0.168783
	DAS42	B	1	NM_011607.2-2342s21c1	TRCN0000313073	Tnc	21923	10090	1.3728e+08	795320	5986360	922360	6511240	3390840	3716800	1.09613	3553820	0.480802
	DAS42	G	10	NM_011607.2-2069s21c1	TRCN0000349824	Tnc	21923	10090	2.4e+07	5583720	5174480	120000	4263840	5379100	2191920	0.407488	3785510	0.512147
	DAS42	G	1	NM_011607.2-6250s21c1	TRCN0000312138	Tnc	21923	10090	960000	36200	17735920	1440	6648600	8886060	3325020	0.374184	6105540	0.826028
	DAS42	F	6	NM_011607.2-2995s21c1	TRCN0000312137	Tnc	21923	10090	3840000	72720	18098720	17360	18017320	9085720	9017340	0.992474	9051530	1.22459
	DAS38	G	12	NM_011623.1-970s1c1	TRCN0000070987	Top2a	21973	10090	1.3728e+08	11442480	12618840	10754000	10269960	12030660	10511980	0.873766	11271320	0.631676
	DAS38	B	10	NM_011623.2-2972s21c1	TRCN0000325431	Top2a	21973	10090	1.3728e+08	12982680	13605920	6312600	13155760	13294300	9734180	0.732207	11514240	0.64529
	DAS38	H	7	NM_011623.2-1897s21c1	TRCN0000325493	Top2a	21973	10090	1.3728e+08	16033120	18867400	18359120	18112160	17450260	18235640	1.04501	17842950	0.999968
	DAS38	C	2	NM_011623.2-3274s21c1	TRCN0000325430	Top2a	21973	10090	1.3728e+08	17290800	19534320	20865520	18611800	18412560	19738660	1.07202	19075610	1.06905
	DAS38	D	6	NM_011623.2-3939s21c1	TRCN0000353984	Top2a	21973	10090	1.3728e+08	17190000	19648720	21427960	20993720	18419360	21210840	1.15155	19815100	1.11049
	DAS37	B	6	NM_011627.2-1592s1c1	TRCN0000176374	Tpbg	21983	10090	1.3728e+08	6258480	7526480	6310800	4491000	6892480	5400900	0.783593	6146690	0.411746
	DAS37	B	2	NM_011627.2-1890s1c1	TRCN0000193433	Tpbg	21983	10090	1920000	19575680	19140480	2749240	1984760	19358080	2367000	0.122275	10862540	0.727645
	DAS37	B	7	NM_011627.2-1653s1c1	TRCN0000193488	Tpbg	21983	10090	1.3728e+08	20245240	21251080	20687240	17870320	20748160	19278780	0.92918	20013470	1.34063
	DAS37	D	1	NM_011627.2-1734s1c1	TRCN0000175578	Tpbg	21983	10090	7.776e+07	21553040	21348400	21253120	19386800	21450720	20319960	0.947286	20885340	1.39904
	DAS44	F	8	NM_027182.2-654s21c1	TRCN0000319690	Trip13	69716	10090	9.408e+07	531680	1363600	398000	334880	947640	366440	0.386687	657040	0.056788
	DAS44	G	7	XM_127444.3-1025s1c1	TRCN0000024989	Trip13	69716	10090	1.3728e+08	5124760	3787040	2313120	2181840	4455900	2247480	0.504383	3351690	0.289687
	DAS44	D	1	XM_127444.3-432s1c1	TRCN0000024992	Trip13	69716	10090	1.104e+08	9904880	12577360	11946240	12771040	11241120	12358640	1.09941	11799880	1.01987
	DAS44	G	8	XM_127444.3-1458s1c1	TRCN0000024993	Trip13	69716	10090	1.3536e+08	13179760	13819200	13687240	13850160	13499480	13768700	1.01994	13634090	1.1784
	DAS44	H	4	XM_127444.3-309s1c1	TRCN0000024991	Trip13	69716	10090	1.3536e+08	17409120	17276280	14664280	15492760	17342700	15078520	0.869445	16210610	1.40108
	DAS39	C	4	NM_011653.1-332s1c1	TRCN0000123593	Tuba1a	22142	10090	1.3728e+08	5602240	6239480	458760	1068560	5920860	763660	0.128978	3342260	0.192455
	DAS39	C	11	NM_011653.1-1324s1c1	TRCN0000123591	Tuba1a	22142	10090	1.0368e+08	8669400	2528720	1093400	2614560	5599060	1853980	0.331123	3726520	0.214582
	DAS39	F	4	NM_011653.1-868s1c1	TRCN0000123592	Tuba1a	22142	10090	1.3728e+08	8104320	5377960	2440880	3199680	6741140	2820280	0.418368	4780710	0.275284
	DAS39	A	4	NM_011653.1-711s1c1	TRCN0000123590	Tuba1a	22142	10090	4.896e+07	15468640	9944280	4094880	6244760	12706460	5169820	0.406865	8938140	0.514679
	DAS39	G	2	NM_011653.1-1430s1c1	TRCN0000123589	Tuba1a	22142	10090	1.3728e+08	17602160	16753560	16397320	17596600	17177860	16996960	0.989469	17087410	0.983933
	DAS36	F	12	NM_009450.1-1431s21c1	TRCN0000294793	Tubb2a	22151	10090	1.3728e+08	9824400	9495120	10238480	9107360	9659760	9672920	1.00136	9666340	0.588597
	DAS36	G	9	NM_009450.1-129s21c1	TRCN0000294794	Tubb2a	22151	10090	1.3728e+08	10594320	14228120	9578120	11153240	12411220	10365680	0.835186	11388450	0.693459
	DAS36	F	1	NM_009450.1-661s1c1	TRCN0000089929	Tubb2a	22151	10090	9.696e+07	11160280	14437760	13399800	10464640	12799020	11932220	0.932276	12365620	0.75296
	DAS36	D	9	NM_009450.1-1390s21c1	TRCN0000294795	Tubb2a	22151	10090	1.3344e+08	13133760	14153120	12264320	11082840	13643440	11673580	0.855619	12658510	0.770795
	DAS36	B	8	NM_009450.1-1458s21c1	TRCN0000287368	Tubb2a	22151	10090	1.3728e+08	14182360	15377480	16943560	15735520	14779920	16339540	1.10552	15559730	0.947454
	DAS42	E	3	NM_026473.2-1375s1c1	TRCN0000090328	Tubb6	67951	10090	1.3728e+08	18760	4301000	3120	733480	2159880	368300	0.170519	1264090	0.171021
	DAS42	H	8	NM_026473.2-1330s1c1	TRCN0000090332	Tubb6	67951	10090	46080000	2311680	6652080	593760	1912040	4481880	1252900	0.279548	2867390	0.387933
	DAS42	E	7	NM_026473.2-177s1c1	TRCN0000090331	Tubb6	67951	10090	4.992e+07	11505480	12036480	196880	15448760	11770980	7822820	0.664585	9796900	1.32544
	DAS42	B	12	NM_026473.2-170s1c1	TRCN0000090329	Tubb6	67951	10090	4.512e+07	12880600	12813520	60440	15381000	12847060	7720720	0.600972	10283890	1.39132
	DAS42	C	7	NM_026473.2-732s21c1	TRCN0000353886	Tubb6	67951	10090	1.1136e+08	15150760	15261360	16334520	17234640	15206060	16784580	1.10381	15995320	2.16403
	DAS40	B	4	NM_026785.2-271s21c1	TRCN0000241129	Ube2c	68612	10090	1.3728e+08	1030320	3975400	695680	193600	2502860	444640	0.177653	1473750	0.136291
	DAS40	A	10	NM_026785.2-176s21c1	TRCN0000241130	Ube2c	68612	10090	1.2672e+08	820360	3414720	1983680	691280	2117540	1337480	0.63162	1727510	0.159759
	DAS40	F	4	NM_026785.2-643s21c1	TRCN0000241131	Ube2c	68612	10090	1.3728e+08	4383640	8012560	3672720	2417440	6198100	3045080	0.491292	4621590	0.427401
	DAS40	A	5	NM_026785.2-543s21c1	TRCN0000241132	Ube2c	68612	10090	1.008e+08	2982600	7484880	5509360	3284080	5233740	4396720	0.840072	4815230	0.445309
	DAS40	G	6	NM_026785.2-409s21c1	TRCN0000241128	Ube2c	68612	10090	1.3728e+08	7087960	9641400	9023120	7362240	8364680	8192680	0.979437	8278680	0.765607
	DAS37	D	7	NM_029770.1-1128s1c1	TRCN0000072081	Unc5b	107449	10090	1.1904e+08	8847200	8453880	8411840	7181720	8650540	7796780	0.901306	8223660	0.550875
	DAS37	E	2	NM_029770.1-2444s1c1	TRCN0000072080	Unc5b	107449	10090	1.3728e+08	14225240	12365080	13344960	11521240	13295160	12433100	0.93516	12864130	0.861724
	DAS37	F	9	NM_029770.1-584s1c1	TRCN0000072079	Unc5b	107449	10090	1.008e+08	16401920	16667120	16294440	12708320	16534520	14501380	0.877037	15517950	1.03949
	DAS37	B	4	NM_029770.1-3092s1c1	TRCN0000072078	Unc5b	107449	10090	1.2e+08	17458720	17988720	18269920	16693320	17723720	17481620	0.98634	17602670	1.17914
	DAS37	B	5	NM_029770.1-2160s1c1	TRCN0000072082	Unc5b	107449	10090	1.3728e+08	21601240	22189760	21515560	18181480	21895500	19848520	0.906511	20872010	1.39814
	DAS42	A	5	NM_001081249.1-698s21c1	TRCN0000240555	Vcan	13003	10090	8.448e+07	46800	945560	4680	1047200	496180	525940	1.05998	511060	0.0691421
	DAS42	A	2	NM_001081249.1-8701s21c1	TRCN0000240553	Vcan	13003	10090	1.3728e+08	533760	5524840	3200	7163440	3029300	3583320	1.18289	3306310	0.447316
	DAS42	C	5	NM_001081249.1-475s1c1	TRCN0000217686	Vcan	13003	10090	5.664e+07	702040	5551880	7960	8730480	3126960	4369220	1.39727	3748090	0.507085
	DAS42	G	5	NM_001081249.1-4748s1c1	TRCN0000216596	Vcan	13003	10090	1.3632e+08	3934160	11018080	5840	9255160	7476120	4630500	0.619372	6053310	0.818961
	DAS42	A	10	NM_001081249.1-8459s21c1	TRCN0000240554	Vcan	13003	10090	7.2e+07	11549240	7540120	10840	12149400	9544680	6080120	0.637017	7812400	1.05695
	DAS40	E	12	NM_025635.1-453s1c1	TRCN0000125658	Zwint	52696	10090	5.088e+07	4163480	9102800	2879240	2506240	6633140	2692740	0.405953	4662940	0.431225
	DAS40	C	5	NM_025635.1-132s1c1	TRCN0000125655	Zwint	52696	10090	9.12e+07	5463000	8573640	6620640	4369520	7018320	5495080	0.782962	6256700	0.578615
	DAS40	B	10	NM_025635.1-1523s1c1	TRCN0000125654	Zwint	52696	10090	9.024e+07	5615560	11092320	7216000	5990720	8353940	6603360	0.790449	7478650	0.69162
	DAS40	G	4	NM_025635.1-711s1c1	TRCN0000125656	Zwint	52696	10090	9.696e+07	11183440	12358080	8900120	9202040	11770760	9051080	0.768946	10410920	0.962795
	DAS40	F	1	NM_025635.1-296s1c1	TRCN0000125657	Zwint	52696	10090	6.24e+07	17288800	21859480	20314200	20675120	19574140	20494660	1.04703	20034400	1.85277
	DAS36	C	2	lacZ_1758s1c1	TRCN0000072242	lacZ		control	9.024e+07	7735480	5998960	4763080	3751000	6867220	4257040	0.619907	5562130	0.338686
	DAS36	G	2	lacZ_305s1c1	TRCN0000072236	lacZ		control	1.3728e+08	12746480	15549080	13278160	14786800	14147780	14032480	0.99185	14090130	0.857968
	DAS37	D	10	lacZ_1758s1c1	TRCN0000072242	lacZ		control	1.3728e+08	4143840	4272440	3046800	2242040	4208140	2644420	0.628406	3426280	0.229515
	DAS37	E	1	lacZ_305s1c1	TRCN0000072236	lacZ		control	1.3728e+08	15956720	14567840	13885200	11206000	15262280	12545600	0.822	13903940	0.931378
	DAS38	G	5	lacZ_1758s1c1	TRCN0000072242	lacZ		control	1.3728e+08	2463240	2863920	2842320	2594840	2663580	2718580	1.02065	2691080	0.150816
	DAS38	E	11	lacZ_305s1c1	TRCN0000072236	lacZ		control	1.3728e+08	16213160	17642960	15982200	13540120	16928060	14761160	0.871994	15844610	0.887976
	DAS39	E	1	lacZ_1758s1c1	TRCN0000072242	lacZ		control	1.3728e+08	9203320	3626400	706320	2915240	6414860	1810780	0.282279	4112820	0.236826
	DAS39	D	1	lacZ_305s1c1	TRCN0000072236	lacZ		control	122880000	19887680	13896360	2836680	15029760	16892020	8933220	0.528843	12912620	0.743539
	DAS40	D	6	lacZ_1758s1c1	TRCN0000072242	lacZ		control	9.024e+07	973480	3739760	1176520	1211840	2356620	1194180	0.506734	1775400	0.164188
	DAS40	H	2	lacZ_305s1c1	TRCN0000072236	lacZ		control	2.88e+07	6153720	13888800	9397320	9001080	10021260	9199200	0.917968	9610230	0.888747
	DAS41	A	2	lacZ_305s1c1	TRCN0000072236	lacZ		control	9.024e+07	7253920	6933280	3943040	5084360	7093600	4513700	0.636306	5803650	0.535186
	DAS41	B	5	lacZ_1758s1c1	TRCN0000072242	lacZ		control	1920000	18423240	16556720	44040	63160	17489980	53600	0.00306461	8771790	0.808894
	DAS42	A	3	lacZ_1758s1c1	TRCN0000072242	lacZ		control	26880000	13640	3666040	3560	6142840	1839840	3073200	1.67036	2456520	0.332346
	DAS42	B	8	lacZ_305s1c1	TRCN0000072236	lacZ		control	1.0656e+08	5389680	3465280	1958840	3814840	4427480	2886840	0.652028	3657160	0.494783
	DAS43	F	1	lacZ_1758s1c1	TRCN0000072242	lacZ		control	8.352e+07	3641600	7531360	1219720	1640120	5586480	1429920	0.255961	3508200	0.362366
	DAS43	G	4	lacZ_305s1c1	TRCN0000072236	lacZ		control	1.2672e+08	6137840	8429680	6662320	4035280	7283760	5348800	0.734346	6316280	0.652416
	DAS44	E	2	lacZ_1758s1c1	TRCN0000072242	lacZ		control	107520000	4385640	6219240	1847880	1999680	5302440	1923780	0.36281	3613110	0.312282
	DAS44	F	3	lacZ_305s1c1	TRCN0000072236	lacZ		control	1.3728e+08	8886240	7468600	6634880	5410520	8177420	6022700	0.736504	7100060	0.613659
	DAS45	B	8	lacZ_1758s1c1	TRCN0000072242	lacZ		control	5.28e+07	1827080	2183720	905680	1577920	2005400	1241800	0.619228	1623600	0.190424
	DAS45	E	11	lacZ_305s1c1	TRCN0000072236	lacZ		control	1.3248e+08	7526000	4133720	5791120	6930960	5829860	6361040	1.09111	6095450	0.714905
	DAS36	B	1	promegaLuc_229s1c1	TRCN0000072250	LUCIFERASE		control	1.632e+07	18536880	19699760	21281880	21744240	19118320	21513060	1.12526	20315690	1.23705
	DAS36	G	1	promegaLuc_755s1c1	TRCN0000072261	LUCIFERASE		control	1.0464e+08	19325560	21306280	21762920	23815000	20315920	22788960	1.12173	21552440	1.31236
	DAS37	A	3	promegaLuc_229s1c1	TRCN0000072250	LUCIFERASE		control	960000	18301120	18643960	108360	102000	18472540	105180	0.00569386	9288860	0.622229
	DAS37	B	8	promegaLuc_755s1c1	TRCN0000072261	LUCIFERASE		control	1.3728e+08	18134520	18820000	17229920	16977760	18477260	17103840	0.92567	17790550	1.19173
	DAS38	F	9	promegaLuc_755s1c1	TRCN0000072261	LUCIFERASE		control	1.3728e+08	17024040	19101080	21574480	22448800	18062560	22011640	1.21863	20037100	1.12293
	DAS38	G	3	promegaLuc_229s1c1	TRCN0000072250	LUCIFERASE		control	7.296e+07	19385800	22821840	21591440	22138880	21103820	21865160	1.03608	21484490	1.20405
	DAS39	G	9	promegaLuc_229s1c1	TRCN0000072250	LUCIFERASE		control	1.1136e+08	22073440	20312560	14356680	16788360	21193000	15572520	0.734795	18382760	1.05852
	DAS39	F	10	promegaLuc_755s1c1	TRCN0000072261	LUCIFERASE		control	1.3728e+08	26025080	22746640	14143040	21263640	24385860	17703340	0.725967	21044600	1.2118
	DAS40	C	9	promegaLuc_229s1c1	TRCN0000072250	LUCIFERASE		control	107520000	2330040	8279640	6652960	2683240	5304840	4668100	0.87997	4986470	0.461145
	DAS40	E	4	promegaLuc_755s1c1	TRCN0000072261	LUCIFERASE		control	1.104e+08	9992000	16416960	15066760	10757400	13204480	12912080	0.977856	13058280	1.20762
	DAS41	C	4	promegaLuc_229s1c1	TRCN0000072250	LUCIFERASE		control	1.3344e+08	5897720	4620800	4510960	7445360	5259260	5978160	1.13669	5618710	0.518131
	DAS41	G	7	promegaLuc_755s1c1	TRCN0000072261	LUCIFERASE		control	1.3728e+08	14845600	16299040	12610920	12754160	15572320	12682540	0.814428	14127430	1.30277
	DAS42	H	5	promegaLuc_229s1c1	TRCN0000072250	LUCIFERASE		control	8.256e+07	61800	9679760	37800	10940840	4870780	5489320	1.12699	5180050	0.700817
	DAS42	E	10	promegaLuc_755s1c1	TRCN0000072261	LUCIFERASE		control	1.2096e+08	10432960	9584680	10520120	11900320	10008820	11210220	1.12003	10609520	1.43538
	DAS43	C	12	promegaLuc_229s1c1	TRCN0000072250	LUCIFERASE		control	5.184e+07	3005520	5187840	6900240	5087120	4096680	5993680	1.46306	5045180	0.521123
	DAS43	C	6	promegaLuc_755s1c1	TRCN0000072261	LUCIFERASE		control	1.0272e+08	11964720	10255920	10956200	10262120	11110320	10609160	0.954892	10859740	1.12172
	DAS44	F	10	promegaLuc_229s1c1	TRCN0000072250	LUCIFERASE		control	7.776e+07	9252320	10467600	7191360	7713240	9859960	7452300	0.755814	8656130	0.74815
	DAS44	H	7	promegaLuc_755s1c1	TRCN0000072261	LUCIFERASE		control	8.16e+07	15144200	15810280	15568800	14960840	15477240	15264820	0.986275	15371030	1.32852
	DAS45	G	12	promegaLuc_229s1c1	TRCN0000072250	LUCIFERASE		control	1.3056e+08	3776080	10273520	5113480	9190640	7024800	7152060	1.01812	7088430	0.831367
	DAS45	C	5	promegaLuc_755s1c1	TRCN0000072261	LUCIFERASE		control	1.3728e+08	6382840	10070120	6925560	11015080	8226480	8970320	1.09042	8598400	1.00846
	DAS36	H	9	PGW	TRCN0000145620			control	4.032e+07	17083560	19528040	20153000	20782000	18305800	20467500	1.11809	19386650	1.18048
	DAS36	H	10	PGW	TRCN0000145620			control	4.416e+07	20293440	21513840	23400200	23229280	20903640	23314740	1.11534	22109190	1.34626
	DAS37	H	10	PGW	TRCN0000145620			control	3.36e+07	18682480	18800440	19826160	18986080	18741460	19406120	1.03546	19073790	1.27769
	DAS37	H	9	PGW	TRCN0000145620			control	3.552e+07	19779120	18702520	19686840	18758840	19240820	19222840	0.999066	19231830	1.28827
	DAS38	H	9	PGW	TRCN0000145620			control	42240000	19986360	21073120	21778400	22643480	20529740	22210940	1.08189	21370340	1.19765
	DAS38	H	10	PGW	TRCN0000145620			control	4.896e+07	19527240	22408520	22493120	23246920	20967880	22870020	1.09072	21918950	1.2284
	DAS39	H	10	PGW	TRCN0000145620			control	26880000	22964880	20500120	23269680	21594760	21732500	22432220	1.0322	22082360	1.27155
	DAS39	H	9	PGW	TRCN0000145620			control	2.976e+07	23024480	22578000	21490760	23215120	22801240	22352940	0.980339	22577090	1.30004
	DAS40	H	10	PGW	TRCN0000145620			control	2.976e+07	16713120	19195840	15570640	17164080	17954480	16367360	0.911603	17160920	1.58703
	DAS40	H	9	PGW	TRCN0000145620			control	30720000	17162160	18127680	17702800	18550480	17644920	18126640	1.0273	17885780	1.65406
	DAS41	H	10	PGW	TRCN0000145620			control	42240000	19028560	18258880	17344960	17279520	18643720	17312240	0.928583	17977980	1.65785
	DAS41	H	9	PGW	TRCN0000145620			control	4.32e+07	19936680	19094440	16803040	18215080	19515560	17509060	0.897185	18512310	1.70712
	DAS42	H	10	PGW	TRCN0000145620			control	0	18277880	17673800	13261960	345760	17975840	6803860	0.3785	12389850	1.67624
	DAS42	H	9	PGW	TRCN0000145620			control	30720000	18454840	17312520	510240	21269440	17883680	10889840	0.608926	14386760	1.94641
	DAS43	H	9	PGW	TRCN0000145620			control	2.784e+07	17068640	16876400	17678000	19016960	16972520	18347480	1.08101	17660000	1.82412
	DAS43	H	10	PGW	TRCN0000145620			control	2.592e+07	17125520	17504800	18765600	17890480	17315160	18328040	1.0585	17821600	1.84081
	DAS44	H	9	PGW	TRCN0000145620			control	2.784e+07	18501400	18940720	15887040	16688120	18721060	16287580	0.870014	17504320	1.5129
	DAS44	H	10	PGW	TRCN0000145620			control	2.784e+07	19859800	18501800	15883680	16429440	19180800	16156560	0.84233	17668680	1.52711
	DAS45	H	10	PGW	TRCN0000145620			control	3.36e+07	17988760	18476880	17941080	15903320	18232820	16922200	0.928118	17577510	2.06158
	DAS45	H	9	PGW	TRCN0000145620			control	30720000	19353640	18946640	15975240	18425160	19150140	17200200	0.898176	18175170	2.13168
	DAS36	E	8	rfp_269s1c1	TRCN0000072208	RFP		control	1.3728e+08	12636440	11896040	9960920	10713800	12266240	10337360	0.842749	11301800	0.688183
	DAS36	A	11	rfp_188s1c1	TRCN0000072209	RFP		control	1.3728e+08	15626080	17101640	17618120	17907720	16363860	17762920	1.0855	17063390	1.03901
	DAS36	B	11	rfp_401s1c1	TRCN0000072212	RFP		control	1.3728e+08	17364280	20303560	20837880	19241840	18833920	20039860	1.06403	19436890	1.18354
	DAS37	E	4	rfp_269s1c1	TRCN0000072208	RFP		control	7.296e+07	15438640	15639200	14229920	11403920	15538920	12816920	0.824827	14177920	0.949731
	DAS37	D	3	rfp_188s1c1	TRCN0000072209	RFP		control	1.3728e+08	18553480	18791840	18057960	17412200	18672660	17735080	0.949789	18203870	1.21942
	DAS37	E	7	rfp_401s1c1	TRCN0000072212	RFP		control	1.344e+08	20663520	19412680	20778200	16178440	20038100	18478320	0.922159	19258210	1.29004
	DAS38	F	3	rfp_269s1c1	TRCN0000072208	RFP		control	1.3728e+08	13459320	16124080	15021040	13455400	14791700	14238220	0.962582	14514960	0.813459
	DAS38	A	3	rfp_188s1c1	TRCN0000072209	RFP		control	1.3728e+08	17597240	21413240	21081760	20060680	19505240	20571220	1.05465	20038230	1.123
	DAS38	E	10	rfp_401s1c1	TRCN0000072212	RFP		control	1.3728e+08	19427480	22300040	23880240	25159720	20863760	24519980	1.17524	22691870	1.27172
	DAS39	A	2	rfp_269s1c1	TRCN0000072208	RFP		control	2.592e+07	20679240	15873320	8508680	14905400	18276280	11707040	0.640559	14991660	0.863255
	DAS39	B	3	rfp_188s1c1	TRCN0000072209	RFP		control	1.3728e+08	21899080	19307760	16527120	19513560	20603420	18020340	0.874629	19311880	1.11202
	DAS39	H	5	rfp_401s1c1	TRCN0000072212	RFP		control	9.504e+07	22863480	23468600	14434640	22762040	23166040	18598340	0.802828	20882190	1.20244
	DAS40	F	9	rfp_269s1c1	TRCN0000072208	RFP		control	53760000	6664000	12443240	9204000	4751480	9553620	6977740	0.730377	8265680	0.764404
	DAS40	E	6	rfp_401s1c1	TRCN0000072212	RFP		control	8.736e+07	7972280	17196120	11111040	10892960	12584200	11002000	0.874271	11793100	1.09062
	DAS40	A	2	rfp_188s1c1	TRCN0000072209	RFP		control	8.64e+07	9677520	16167880	13544880	11742560	12922700	12643720	0.978412	12783210	1.18218
	DAS41	B	6	rfp_269s1c1	TRCN0000072208	RFP		control	6.432e+07	8981440	5156200	5189200	7340800	7068820	6265000	0.886287	6666910	0.614791
	DAS41	E	12	rfp_401s1c1	TRCN0000072212	RFP		control	1.008e+08	13218480	10434600	11880880	8224280	11826540	10052580	0.850002	10939560	1.0088
	DAS41	H	7	rfp_188s1c1	TRCN0000072209	RFP		control	1.248e+08	15270480	16747400	13820360	12567280	16008940	13193820	0.824153	14601380	1.34647
	DAS42	E	5	rfp_269s1c1	TRCN0000072208	RFP		control	42240000	29000	8868120	9640	7219440	4448560	3614540	0.812519	4031550	0.545434
	DAS42	F	12	rfp_401s1c1	TRCN0000072212	RFP		control	5.28e+07	8222840	10298200	326280	8935840	9260520	4631060	0.500086	6945790	0.939706
	DAS42	A	8	rfp_188s1c1	TRCN0000072209	RFP		control	4.32e+07	11304160	11200520	9067320	10674240	11252340	9870780	0.87722	10561560	1.42889
	DAS43	C	4	rfp_401s1c1	TRCN0000072212	RFP		control	1.3728e+08	3928560	8584840	5847160	4910400	6256700	5378780	0.859683	5817740	0.600921
	DAS43	A	5	rfp_269s1c1	TRCN0000072208	RFP		control	3.936e+07	8551280	9705160	7126280	7720720	9128220	7423500	0.813247	8275860	0.854823
	DAS43	D	11	rfp_188s1c1	TRCN0000072209	RFP		control	1.0656e+08	12858760	13752160	12173040	13240440	13305460	12706740	0.955002	13006100	1.34342
	DAS44	A	7	rfp_269s1c1	TRCN0000072208	RFP		control	9.792e+07	6512800	7473360	5606800	5435240	6993080	5521020	0.789498	6257050	0.540798
	DAS44	F	4	rfp_188s1c1	TRCN0000072209	RFP		control	1.152e+08	12020680	13178600	14607720	14482640	12599640	14545180	1.15441	13572410	1.17306
	DAS44	G	10	rfp_401s1c1	TRCN0000072212	RFP		control	7.104e+07	15921280	17662440	12693680	11272920	16791860	11983300	0.713637	14387580	1.24352
	DAS45	A	8	rfp_269s1c1	TRCN0000072208	RFP		control	1.0464e+08	3290200	3102640	2651800	3004720	3196420	2828260	0.884821	3012340	0.353302
	DAS45	B	1	rfp_401s1c1	TRCN0000072212	RFP		control	1.1424e+08	3532840	9022960	4618160	6598080	6277900	5608120	0.893311	5943010	0.697026
	DAS45	G	2	rfp_188s1c1	TRCN0000072209	RFP		control	1.3728e+08	12239680	14313680	12415560	12572440	13276680	12494000	0.941049	12885340	1.51126
	DAS36	H	12		TRCN0000000000			no virus	0	15617680	17884880	66360	67560	16751280	66960	0.00399731
	DAS36	A	9		TRCN0000000000			no virus	0	15789840	18941600	92280	95720	17365720	94000	0.00541296
	DAS36	A	8		TRCN0000000000			no virus	0	15591400	19594280	111640	110480	17592840	111060	0.0063128
	DAS36	H	5		TRCN0000000000			no virus	0	17271680	19169680	104920	103400	18220680	104160	0.00571658
	DAS36	H	11		TRCN0000000000			no virus	0	17002560	19919920	109920	106520	18461240	108220	0.00586201
	DAS36	H	8		TRCN0000000000			no virus	0	17124960	20337720	126960	129760	18731340	128360	0.00685269
	DAS36	H	6		TRCN0000000000			no virus	0	17651760	20335080	86600	88520	18993420	87560	0.00461002
	DAS37	H	12		TRCN0000000000			no virus	0	18834920	17191600	64640	144520	18013260	104580	0.00580572
	DAS37	H	11		TRCN0000000000			no virus	0	19449000	17777320	89320	85600	18613160	87460	0.00469883
	DAS37	G	2		TRCN0000000000			no virus	0	19630880	18250480	126240	116320	18940680	121280	0.00640315
	DAS37	G	4		TRCN0000000000			no virus	0	20456440	18804120	133200	125720	19630280	129460	0.00659491
	DAS37	C	11		TRCN0000000000			no virus	0	20356480	19300120	131320	122720	19828300	127020	0.006406
	DAS37	C	2		TRCN0000000000			no virus	960000	19915520	19761320	127440	119960	19838420	123700	0.00623538
	DAS37	E	5		TRCN0000000000			no virus	960000	20365440	19378560	143680	127280	19872000	135480	0.00681763
	DAS37	E	11		TRCN0000000000			no virus	0	20612120	19875360	127480	113320	20243740	120400	0.00594752
	DAS38	H	2		TRCN0000000000			no virus	0	16705720	18091480	119440	113880	17398600	116660	0.00670514
	DAS38	G	6		TRCN0000000000			no virus	0	18577200	22107240	133240	130320	20342220	131780	0.00647815
	DAS38	H	12		TRCN0000000000			no virus	0	19718560	21154520	57840	56240	20436540	57040	0.00279108
	DAS38	H	11		TRCN0000000000			no virus	0	19236240	21887080	93560	92520	20561660	93040	0.00452493
	DAS38	F	11		TRCN0000000000			no virus	0	19725720	23510360	135280	121920	21618040	128600	0.00594874
	DAS38	E	8		TRCN0000000000			no virus	0	19370400	25519480	179480	171120	22444940	175300	0.00781022
	DAS38	A	5		TRCN0000000000			no virus	0	21554400	24788120	144040	148680	23171260	146360	0.00631645
	DAS39	H	12		TRCN0000000000			no virus	0	21130360	20555080	68080	75520	20842720	71800	0.00344485
	DAS39	F	3		TRCN0000000000			no virus	0	22923760	20643400	85200	116320	21783580	100760	0.0046255
	DAS39	G	6		TRCN0000000000			no virus	0	23411800	20971800	128120	130280	22191800	129200	0.00582197
	DAS39	H	11		TRCN0000000000			no virus	0	22504360	22172280	93240	105440	22338320	99340	0.00444707
	DAS39	D	6		TRCN0000000000			no virus	0	23456800	22544640	100760	141520	23000720	121140	0.00526679
	DAS39	B	7		TRCN0000000000			no virus	0	25917040	23016440	84800	129880	24466740	107340	0.00438718
	DAS39	E	9		TRCN0000000000			no virus	0	26617640	23147840	87240	121920	24882740	104580	0.00420291
	DAS40	B	9		TRCN0000000000			no virus	0	14843000	15724160	87280	63280	15283580	75280	0.00492555
	DAS40	D	10		TRCN0000000000			no virus	0	15307840	16863600	78480	66480	16085720	72480	0.00450586
	DAS40	C	2		TRCN0000000000			no virus	0	14759440	17478600	80960	73120	16119020	77040	0.00477945
	DAS40	E	2		TRCN0000000000			no virus	0	15919280	17832440	107800	96320	16875860	102060	0.00604769
	DAS40	H	12		TRCN0000000000			no virus	0	16207640	17897640	44840	41640	17052640	43240	0.00253568
	DAS40	F	3		TRCN0000000000			no virus	0	15903600	18681040	105560	96480	17292320	101020	0.0058419
	DAS40	H	11		TRCN0000000000			no virus	0	15891280	18827920	68680	68720	17359600	68700	0.00395746
	DAS41	D	4		TRCN0000000000			no virus	0	16763400	16273000	56720	62200	16518200	59460	0.00359967
	DAS41	F	7		TRCN0000000000			no virus	0	17440120	17183400	74720	72720	17311760	73720	0.00425838
	DAS41	G	9		TRCN0000000000			no virus	0	17377600	17076440	88440	262040	17227020	175240	0.0101724
	DAS41	G	4		TRCN0000000000			no virus	0	18481880	17819280	95320	80000	18150580	87660	0.0048296
	DAS41	H	11		TRCN0000000000			no virus	0	18702120	18458800	59200	55960	18580460	57580	0.00309895
	DAS41	H	12		TRCN0000000000			no virus	0	19378280	18386520	34160	36200	18882400	35180	0.00186311
	DAS41	B	1		TRCN0000000000			no virus	0	20682600	18342080	46000	52520	19512340	49260	0.00252456
	DAS41	H	8		TRCN0000000000			no virus	0	19721040	19241280	106480	93600	19481160	100040	0.00513522
	DAS41	A	7		TRCN0000000000			no virus	0	19709520	19725880	41360	52400	19717700	46880	0.00237756
	DAS42	G	3		TRCN0000000000			no virus	0	50720	16607200	2760	82800	8328960	42780	0.0051363
	DAS42	C	3		TRCN0000000000			no virus	0	225040	16747360	3200	94840	8486200	49020	0.00577644
	DAS42	A	4		TRCN0000000000			no virus	0	15280	17712840	3240	45800	8864060	24520	0.00276623
	DAS42	F	4		TRCN0000000000			no virus	0	1080760	16824600	4400	76840	8952680	40620	0.00453719
	DAS42	H	12		TRCN0000000000			no virus	0	17541760	16960880	45400	36480	17251320	40940	0.00237315
	DAS42	H	11		TRCN0000000000			no virus	0	17432440	17290800	28080	54880	17361620	41480	0.00238918
	DAS42	C	12		TRCN0000000000			no virus	0	16803120	18315880	2905200	63040	17559500	1484120	0.0845195
	DAS43	A	1		TRCN0000000000			no virus	960000	16667520	15661600	484200	1643960	16164560	1064080	0.065828
	DAS43	H	12		TRCN0000000000			no virus	0	17395920	17403000	20360	21240	17399460	20800	0.00119544
	DAS43	E	3		TRCN0000000000			no virus	1920000	17489840	17723200	405720	255920	17606520	330820	0.0187896
	DAS43	H	11		TRCN0000000000			no virus	0	18193440	17769760	53160	51200	17981600	52180	0.00290186
	DAS43	C	11		TRCN0000000000			no virus	0	15639600	17295080	1977800	1275560	16467340	1626680	0.0987822
	DAS43	D	3		TRCN0000000000			no virus	0	16179080	16630040	1311120	2434520	16404560	1872820	0.114165
	DAS43	E	2		TRCN0000000000			no virus	960000	17741560	19598840	643800	1370440	18670200	1007120	0.0539426
	DAS43	E	11		TRCN0000000000			no virus	0	18795000	17940040	1743480	1032080	18367520	1387780	0.0755562
	DAS43	E	1		TRCN0000000000			no virus	0	18294280	18496160	2854840	2538360	18395220	2696600	0.146592
	DAS43	E	6		TRCN0000000000			no virus	0	16021360	17283760	4590840	5357040	16652560	4973940	0.298689
	DAS44	D	7		TRCN0000000000			no virus	0	18081720	17759360	87800	95920	17920540	91860	0.00512596
	DAS44	B	8		TRCN0000000000			no virus	0	18392480	17757440	67920	74600	18074960	71260	0.00394247
	DAS44	H	11		TRCN0000000000			no virus	0	18353920	17821000	62560	62360	18087460	62460	0.00345322
	DAS44	C	1		TRCN0000000000			no virus	0	17705360	18475320	79840	77760	18090340	78800	0.00435592
	DAS44	C	11		TRCN0000000000			no virus	0	18375600	17999920	63920	61840	18187760	62880	0.00345727
	DAS44	H	12		TRCN0000000000			no virus	0	18532200	18113800	34080	35240	18323000	34660	0.00189161
	DAS44	F	1		TRCN0000000000			no virus	0	18928080	20349080	54520	55480	19638580	55000	0.00280061
	DAS45	D	6		TRCN0000000000			no virus	0	6585520	18914760	73960	91760	12750140	82860	0.00649875
	DAS45	H	12		TRCN0000000000			no virus	0	17815840	17073720	29320	39720	17444780	34520	0.00197882
	DAS45	H	11		TRCN0000000000			no virus	0	17631760	18266120	60720	66240	17948940	63480	0.0035367
	DAS45	E	2		TRCN0000000000			no virus	0	18331560	18624360	65520	79720	18477960	72620	0.00393009
	DAS45	D	12		TRCN0000000000			no virus	0	19066160	18035040	46160	62800	18550600	54480	0.00293683
	DAS45	E	3		TRCN0000000000			no virus	0	18671960	18940840	57440	70880	18806400	64160	0.0034116
	DAS45	E	8		TRCN0000000000			no virus	0	17858080	19543040	1191760	825680	18700560	1008720	0.0539406
