# Supplementary material for: Functional genomic screening reveals asparagine dependence as a metabolic vulnerability in sarcoma
Source: eLife. 2015 Oct 24;4:e09436. doi: 10.7554/eLife.09436 (PMC4695385; doi:10.7554/eLife.09436)
Supplement: Supplementary file 3. — DOI: http://dx.doi.org/10.7554/eLife.09436.016 [file elife-09436-supp3.xlsx]

## Sheet: Sheet1
	Supplementary File 3: Kras; p16p19null rhabdomyosarcoma cell line T14R: raw data from shRNA screen (control plate CTR01).
	Plate ID	Well	Column	Clone Name	Clone ID	Symbol	Taxon ID	(-) Puro	(-) Puro	(+) Puro	(+) Puro	(+) Puro	Average(-)	Average (+)	C.C.	Average	% of control
	CTR01_1	A	1	clonetechGfp_438s1c1	TRCN0000072178	GFP	control	11610600	18765320	684560	1016240	1592400	15187960	1.09773e+06	0.0722765	6733824	0.458982
	CTR01_1	A	2	clonetechGfp_228s1c1	TRCN0000072179	GFP	control	2122440	9654960	122560	111720	179960	5888700	138080	0.0234483	2438328	0.166198
	CTR01_1	A	3	clonetechGfp_453s1c1	TRCN0000072180	GFP	control	12250480	10671440	1465480	926920	1483120	11460960	1291840	0.112717	5359488	0.365307
	CTR01_1	A	4	clonetechGfp_437s1c1	TRCN0000072181	GFP	control	12339880	15810160	494320	604000	498120	14075020	532147	0.0378079	5949296	0.405508
	CTR01_1	A	5	clonetechGfp_693s1c1	TRCN0000072182	GFP	control	24537800	26582120	17355840	16348600	14927440	25559960	1.62106e+07	0.63422	19950360	1.35983
	CTR01_1	A	6	clonetechGfp_696s1c1	TRCN0000072183	GFP	control	12867200	15084400	330560	230400	734160	13975800	431707	0.0308896	5849344	0.398696
	CTR01_1	A	7	clonetechGfp_684s1c1	TRCN0000072184	GFP	control	11479480	23121120	6097400	3483800	4656520	17300300	4.74591e+06	0.274325	9767664	0.665771
	CTR01_1	A	8	clonetechGfp_436s1c1	TRCN0000072185	GFP	control	8784720	15594160	305440	214360	197920	12189440	239240	0.0196268	5019320	0.342121
	CTR01_1	A	9	clonetechGfp_587s1c1	TRCN0000072186	GFP	control	9481120	29760000	9384480	4048240	5853240	19620560	6.42865e+06	0.327649	11705416	0.79785
	CTR01_1	A	10	clonetechGfp_692s1c1	TRCN0000072187	GFP	control	14834560	30439440	19379000	9961400	11329800	22637000	1.35567e+07	0.598875	17188840	1.1716
	CTR01_1	A	11	clonetechGfp_226s1c1	TRCN0000072188	GFP	control	6962960	14427400	1680760	1649280	1460240	10695180	1596760	0.149297	5236128	0.356898
	CTR01_1	A	12	clonetechGfp_197s1c1	TRCN0000072189	GFP	control	11004840	16660320	2273040	3648600	2409000	13832580	2776880	0.200749	7199160	0.4907
	CTR01_1	B	1	clonetechGfp_229s1c1	TRCN0000072190	GFP	control	3865120	7549000	116480	68440	102960	5707060	95960	0.0168143	2340400	0.159523
	CTR01_1	B	3	clonetechGfp_477s1c1	TRCN0000072192	GFP	control	5893520	1969000	131600	109040	139840	3931260	126827	0.0322611	1648600	0.11237
	CTR01_1	B	4	clonetechGfp_63s1c1	TRCN0000072193	GFP	control	3686160	7147080	1236440	553360	903520	5416620	897773	0.165744	2705312	0.184396
	CTR01_1	B	5	clonetechGfp_231s1c1	TRCN0000072194	GFP	control	5216560	3879800	1227840	714640	266640	4548180	736373	0.161905	2261096	0.154118
	CTR01_1	B	6	clonetechGfp_62s1c1	TRCN0000072195	GFP	control	512640	3776360	284400	1510680	647880	2144500	814320	0.379725	1346392	0.0917711
	CTR01_1	B	7	clonetechGfp_449s1c1	TRCN0000072196	GFP	control	4517200	4226560	1220920	1040200	1231720	4371880	1164280	0.266311	2447320	0.166811
	CTR01_1	B	8	clonetechGfp_117s1c1	TRCN0000072197	GFP	control	9999400	12640920	5101680	6640640	6108280	11320160	5950200	0.525629	8098184	0.551978
	CTR01_1	B	9	clonetechGfp_645s1c1	TRCN0000072198	GFP	control	2210320	8566760	1002680	764080	935120	5388540	900627	0.167137	2695792	0.183747
	CTR01_1	B	10	clonetechGfp_128s1c1	TRCN0000072199	GFP	control	6895520	8361680	2441960	3024480	2828280	7628600	2.76491e+06	0.36244	4710384	0.321063
	CTR01_1	B	11	clonetechGfp_428s1c1	TRCN0000072200	GFP	control	1604000	6811320	939920	991240	680920	4207660	870693	0.206931	2205480	0.150327
	CTR01_1	B	12	clonetechGfp_49s1c1	TRCN0000072201	GFP	control	2326960	3745360	946920	566840	659200	3036160	724320	0.238565	1649056	0.112401
	CTR01_1	C	1	clonetechGfp_506s1c1	TRCN0000072202	GFP	control	8734440	12372320	3574040	3376880	1663720	10553380	2.87155e+06	0.272097	5944280	0.405167
	CTR01_2	A	1	clonetechGfp_438s1c1	TRCN0000072178	GFP	control	11415640	13103040	731840	878400	1078800	12259340	896347	0.0731154	5441544	0.3709
	CTR01_2	A	2	clonetechGfp_228s1c1	TRCN0000072179	GFP	control	4289960	7075360	99240	279240	630600	5682660	336360	0.0591906	2474880	0.16869
	CTR01_2	A	3	clonetechGfp_453s1c1	TRCN0000072180	GFP	control	7993200	11064320	460000	675040	1542000	9528760	892347	0.0936477	4346912	0.296289
	CTR01_2	A	4	clonetechGfp_437s1c1	TRCN0000072181	GFP	control	3249120	4827320	157840	305600	591120	4038220	351520	0.0870483	1826200	0.124475
	CTR01_2	A	5	clonetechGfp_693s1c1	TRCN0000072182	GFP	control	16323200	15969360	11811760	13825000	16186040	16146280	1.39409e+07	0.863415	14823072	1.01035
	CTR01_2	A	6	clonetechGfp_696s1c1	TRCN0000072183	GFP	control	3447120	6285320	256080	227920	459200	4866220	314400	0.0646087	2135128	0.145532
	CTR01_2	A	7	clonetechGfp_684s1c1	TRCN0000072184	GFP	control	10597880	9705760	2777800	3947280	7655080	10151820	4.79339e+06	0.47217	6936760	0.472815
	CTR01_2	A	8	clonetechGfp_436s1c1	TRCN0000072185	GFP	control	2243000	4727120	218040	223400	487400	3485060	309613	0.0888402	1579792	0.10768
	CTR01_2	A	9	clonetechGfp_587s1c1	TRCN0000072186	GFP	control	8950840	12826720	3717800	4399960	6656440	10888780	4.92473e+06	0.452276	7310352	0.498279
	CTR01_2	A	10	clonetechGfp_692s1c1	TRCN0000072187	GFP	control	17924840	17812360	14115920	17019480	16097560	17868600	15744320	0.881117	16594032	1.13106
	CTR01_2	A	11	clonetechGfp_226s1c1	TRCN0000072188	GFP	control	9405920	9843880	1447760	2245280	2262440	9624900	1985160	0.206253	5041056	0.343602
	CTR01_2	A	12	clonetechGfp_197s1c1	TRCN0000072189	GFP	control	8529440	10633160	4869320	7169760	7383680	9581300	6.47425e+06	0.675718	7717072	0.526001
	CTR01_2	B	1	clonetechGfp_229s1c1	TRCN0000072190	GFP	control	2498080	5007480	59600	115240	161880	3752780	112240	0.0299085	1568456	0.106907
	CTR01_2	B	3	clonetechGfp_477s1c1	TRCN0000072192	GFP	control	1037880	3069920	66960	117800	115160	2053900	99973.3	0.0486749	881544	0.0600867
	CTR01_2	B	4	clonetechGfp_63s1c1	TRCN0000072193	GFP	control	3598400	3428880	497720	1022080	1237760	3513640	919187	0.261605	1956968	0.133388
	CTR01_2	B	5	clonetechGfp_231s1c1	TRCN0000072194	GFP	control	2161200	1574880	1016320	931040	942760	1868040	963373	0.515713	1325240	0.0903293
	CTR01_2	B	6	clonetechGfp_62s1c1	TRCN0000072195	GFP	control	985440	2911240	609520	602080	506680	1948340	572760	0.293973	1122992	0.076544
	CTR01_2	B	7	clonetechGfp_449s1c1	TRCN0000072196	GFP	control	4630800	2907960	1588560	1868280	1099600	3769380	1.51881e+06	0.402935	2419040	0.164884
	CTR01_2	B	8	clonetechGfp_117s1c1	TRCN0000072197	GFP	control	9961400	12243200	4343440	5387360	4582560	11102300	4771120	0.429742	7303592	0.497818
	CTR01_2	B	9	clonetechGfp_645s1c1	TRCN0000072198	GFP	control	6028000	8086080	633600	908960	810040	7057040	784200	0.111123	3293336	0.224476
	CTR01_2	B	10	clonetechGfp_128s1c1	TRCN0000072199	GFP	control	7990240	9350000	1660680	3006760	2249960	8670120	2305800	0.265948	4851528	0.330684
	CTR01_2	B	11	clonetechGfp_428s1c1	TRCN0000072200	GFP	control	4342120	9700880	652560	858480	670320	7021500	727120	0.103556	3244872	0.221173
	CTR01_2	B	12	clonetechGfp_49s1c1	TRCN0000072201	GFP	control	8921960	7986680	595520	912840	895040	8454320	801133	0.0947602	3862408	0.263265
	CTR01_2	C	1	clonetechGfp_506s1c1	TRCN0000072202	GFP	control	8013880	16475000	3010120	6391960	3184400	12244440	4.19549e+06	0.342645	7415072	0.505417
	CTR01_1	D	10	lacZ_1168s1c1	TRCN0000072223	lacZ	control	7677360	5521120	3885280	4020320	4428640	6599240	4.11141e+06	0.623013	5106544	0.348066
	CTR01_1	D	11	lacZ_1339s1c1	TRCN0000072224	lacZ	control	33021800	36764160	25685760	33249080	26324200	34892980	28419680	0.814481	31009000	2.1136
	CTR01_1	D	12	lacZ_2083s1c1	TRCN0000072225	lacZ	control	22626320	22665760	17767760	21826080	15518680	22646040	18370840	0.811216	20080920	1.36873
	CTR01_1	E	1	lacZ_1341s1c1	TRCN0000072226	lacZ	control	6945120	12575040	1184240	1548880	3447200	9760080	2.06011e+06	0.211075	5140096	0.350353
	CTR01_1	E	2	lacZ_1397s1c1	TRCN0000072227	lacZ	control	14366160	14277560	6263680	1456760	9032040	14321860	5584160	0.389905	9079240	0.618848
	CTR01_1	E	3	lacZ_2082s1c1	TRCN0000072228	lacZ	control	15467440	23210480	14164000	2239000	8923560	19338960	8.44219e+06	0.436538	12800896	0.872519
	CTR01_1	E	4	lacZ_1340s1c1	TRCN0000072229	lacZ	control	18428560	18372240	8587600	2794440	5099080	18400400	5.49371e+06	0.298565	10656384	0.726347
	CTR01_1	E	5	lacZ_3003s1c1	TRCN0000072230	lacZ	control	9804680	13743440	3873200	4950640	5589560	11774060	4.80447e+06	0.408055	7592304	0.517497
	CTR01_1	E	6	lacZ_1650s1c1	TRCN0000072231	lacZ	control	30714840	36131160	37891320	26567000	26842360	33423000	30433560	0.910557	31629336	2.15588
	CTR01_1	E	7	lacZ_27s1c1	TRCN0000072232	lacZ	control	23921040	28714920	18683600	19834400	18672880	26317980	1.90636e+07	0.724358	21965368	1.49718
	CTR01_1	E	8	lacZ_656s1c1	TRCN0000072233	lacZ	control	12337120	9618880	1781720	3217480	4739440	10978000	3.24621e+06	0.295702	6338928	0.432066
	CTR01_1	E	9	lacZ_14s1c1	TRCN0000072234	lacZ	control	17763600	14674800	9871160	3620160	4408560	16219200	5.96663e+06	0.367874	10067656	0.686219
	CTR01_1	E	10	lacZ_1935s1c1	TRCN0000072235	lacZ	control	13711160	13320960	2895160	2714480	2290640	13516060	2.63343e+06	0.194837	6986480	0.476204
	CTR01_1	E	11	lacZ_305s1c1	TRCN0000072236	lacZ	control	12461880	13693160	6107800	4590840	4994880	13077520	5.23117e+06	0.400013	8369712	0.570486
	CTR01_1	E	12	lacZ_816s1c1	TRCN0000072237	lacZ	control	20947960	23171240	12353720	16196440	11577240	22059600	13375800	0.606348	16849320	1.14846
	CTR01_1	F	1	lacZ_1932s1c1	TRCN0000072238	lacZ	control	6629120	9767360	643800	978240	1910320	8198240	1.17745e+06	0.143623	3985768	0.271673
	CTR01_1	F	2	lacZ_25s1c1	TRCN0000072239	lacZ	control	29085240	30917520	20565320	14399680	20683880	30001380	1.85496e+07	0.618292	23130328	1.57658
	CTR01_1	F	3	lacZ_29s1c1	TRCN0000072240	lacZ	control	28886520	33025120	6481720	6196400	11179680	30955820	7952600	0.256902	17153888	1.16922
	CTR01_1	F	4	lacZ_2265s1c1	TRCN0000072241	lacZ	control	20787280	22080560	17132280	15059520	11228240	21433920	1.44733e+07	0.675254	17257576	1.17629
	CTR01_1	F	5	lacZ_1758s1c1	TRCN0000072242	lacZ	control	14159960	13814760	5112120	3461920	2244600	13987360	3.60621e+06	0.257819	7758672	0.528837
	CTR01_2	D	10	lacZ_1168s1c1	TRCN0000072223	lacZ	control	5950720	14538040	4890360	8127200	5422720	10244380	6146760	0.600013	7785808	0.530686
	CTR01_2	D	11	lacZ_1339s1c1	TRCN0000072224	lacZ	control	22448000	20136000	17924040	21304440	20495000	21292000	1.99078e+07	0.934991	20461496	1.39467
	CTR01_2	D	12	lacZ_2083s1c1	TRCN0000072225	lacZ	control	16055520	16249960	18601760	17628520	18174480	16152740	18134920	1.12271	17342048	1.18205
	CTR01_2	E	1	lacZ_1341s1c1	TRCN0000072226	lacZ	control	11434200	18490800	4930160	10908560	8604400	14962500	8.14771e+06	0.544542	10873624	0.741154
	CTR01_2	E	2	lacZ_1397s1c1	TRCN0000072227	lacZ	control	16520800	14198080	4914080	14242520	10480560	15359440	9.87905e+06	0.643191	12071208	0.822782
	CTR01_2	E	3	lacZ_2082s1c1	TRCN0000072228	lacZ	control	17176120	19531640	15022880	17527800	18123400	18353880	16891360	0.920315	17476368	1.1912
	CTR01_2	E	4	lacZ_1340s1c1	TRCN0000072229	lacZ	control	13237000	18162400	11579320	12536040	8605440	15699700	1.09069e+07	0.694722	12824040	0.874096
	CTR01_2	E	5	lacZ_3003s1c1	TRCN0000072230	lacZ	control	13680600	15258080	6895160	15491920	10641160	14469340	1.10094e+07	0.760879	12393384	0.844742
	CTR01_2	E	6	lacZ_1650s1c1	TRCN0000072231	lacZ	control	21726200	22238520	20784560	22546560	22560680	21982360	2.19639e+07	0.999162	21971304	1.49758
	CTR01_2	E	7	lacZ_27s1c1	TRCN0000072232	lacZ	control	20232440	20813000	18127760	21974000	21650160	20522720	2.0584e+07	1.00298	20559472	1.40135
	CTR01_2	E	8	lacZ_656s1c1	TRCN0000072233	lacZ	control	13589640	12632200	3497000	12344280	3457000	13110920	6432760	0.490641	9104024	0.620537
	CTR01_2	E	9	lacZ_14s1c1	TRCN0000072234	lacZ	control	14220440	15512640	8132240	9670160	9098160	14866540	8.96685e+06	0.603157	11326728	0.772038
	CTR01_2	E	10	lacZ_1935s1c1	TRCN0000072235	lacZ	control	12438320	17103080	4994760	14269560	4678880	14770700	7.98107e+06	0.540331	10696920	0.72911
	CTR01_2	E	11	lacZ_305s1c1	TRCN0000072236	lacZ	control	9444400	15729720	6111400	9161360	7787720	12587060	7.68683e+06	0.610693	9646920	0.657541
	CTR01_2	E	12	lacZ_816s1c1	TRCN0000072237	lacZ	control	15149280	17953040	13452760	17627920	15872480	16551160	1.56511e+07	0.945617	16011096	1.09133
	CTR01_2	F	1	lacZ_1932s1c1	TRCN0000072238	lacZ	control	8756280	15031600	941920	2733840	2758880	11893940	2144880	0.180334	6044504	0.411998
	CTR01_2	F	2	lacZ_25s1c1	TRCN0000072239	lacZ	control	20688240	20931000	2982840	4768760	7621480	20809620	5124360	0.24625	11398464	0.776928
	CTR01_2	F	3	lacZ_29s1c1	TRCN0000072240	lacZ	control	20543960	21447600	745000	2045040	1763120	20995780	1517720	0.0722869	9308944	0.634505
	CTR01_2	F	4	lacZ_2265s1c1	TRCN0000072241	lacZ	control	14337400	20059720	8418960	14125240	12073440	17198560	1.15392e+07	0.670941	13802952	0.940819
	CTR01_2	F	5	lacZ_1758s1c1	TRCN0000072242	lacZ	control	7003680	12242280	2442480	6350920	5936160	9622980	4.90985e+06	0.510222	6795104	0.463159
	CTR01_1	F	6	promegaLuc_168s1c1	TRCN0000072243	LUCIFERASE	control	27607520	32762760	24752600	24278960	22633080	30185140	2.38882e+07	0.79139	26406984	1.79992
	CTR01_1	F	7	promegaLuc_224s1c1	TRCN0000072244	LUCIFERASE	control	31772280	32144320	24188880	24211400	21193600	31958300	23197960	0.725882	26702096	1.82003
	CTR01_1	F	8	promegaLuc_225s1c1	TRCN0000072245	LUCIFERASE	control	31065240	34855920	26020120	24121960	21276480	32960580	2.38062e+07	0.722262	27467944	1.87224
	CTR01_1	F	9	promegaLuc_221s1c1	TRCN0000072246	LUCIFERASE	control	30239440	33990400	30450760	22854240	23370600	32114920	2.55585e+07	0.795846	28181088	1.92084
	CTR01_1	F	10	promegaLuc_230s1c1	TRCN0000072247	LUCIFERASE	control	17822920	22071040	8040320	10541200	7618360	19946980	8.73329e+06	0.437825	13218768	0.901001
	CTR01_1	F	11	promegaLuc_1510s1c1	TRCN0000072248	LUCIFERASE	control	28239360	32949520	21902960	18118200	14676520	30594440	18232560	0.595944	23177312	1.57978
	CTR01_1	F	12	promegaLuc_976s1c1	TRCN0000072249	LUCIFERASE	control	19623960	19480840	11746800	13422000	3940080	19552400	9702960	0.496254	13642736	0.929899
	CTR01_1	G	1	promegaLuc_229s1c1	TRCN0000072250	LUCIFERASE	control	27131840	28659920	5693000	4457760	6965720	27895880	5.70549e+06	0.204528	14581648	0.993896
	CTR01_1	G	2	promegaLuc_163s1c1	TRCN0000072251	LUCIFERASE	control	26467280	29403520	21916240	21885800	20719800	27935400	21507280	0.769893	24078528	1.64121
	CTR01_1	G	3	promegaLuc_154s1c1	TRCN0000072252	LUCIFERASE	control	29037600	31015240	28351240	21339960	24467240	30026420	24719480	0.823258	26842256	1.82959
	CTR01_1	G	4	promegaLuc_754s1c1	TRCN0000072253	LUCIFERASE	control	21723440	26699440	20221240	20144520	16238120	24211440	18867960	0.779299	21005352	1.43174
	CTR01_1	G	5	promegaLuc_745s1c1	TRCN0000072254	LUCIFERASE	control	16897120	27566160	14746800	11800160	9528200	22231640	1.20251e+07	0.540898	16107688	1.09791
	CTR01_1	G	6	promegaLuc_601s1c1	TRCN0000072255	LUCIFERASE	control	22766080	22103480	4159360	1704360	1437520	22434780	2.43375e+06	0.108481	10434160	0.7112
	CTR01_1	G	7	promegaLuc_158s1c1	TRCN0000072256	LUCIFERASE	control	27201600	31736080	20630080	20838960	16316920	29468840	1.9262e+07	0.653639	23344728	1.59119
	CTR01_1	G	8	promegaLuc_162s1c1	TRCN0000072257	LUCIFERASE	control	15273960	17736480	4360120	10579120	2717280	16505220	5.88551e+06	0.356585	10133392	0.6907
	CTR01_1	G	9	promegaLuc_1193s1c1	TRCN0000072258	LUCIFERASE	control	15953520	18523640	4439440	6790080	3219680	17238580	4816400	0.279397	9785272	0.666971
	CTR01_1	G	10	promegaLuc_159s1c1	TRCN0000072259	LUCIFERASE	control	25922000	29546680	18055840	26349040	20809040	27734340	2.1738e+07	0.783793	24136520	1.64516
	CTR01_1	G	11	promegaLuc_228s1c1	TRCN0000072260	LUCIFERASE	control	15168920	19701120	9782000	9063800	8960520	17435020	9.26877e+06	0.531618	12535272	0.854413
	CTR01_1	G	12	promegaLuc_755s1c1	TRCN0000072261	LUCIFERASE	control	23385880	27226360	24452160	26761120	20781840	25306120	2.39984e+07	0.948323	24521472	1.6714
	CTR01_1	H	1	promegaLuc_153s1c1	TRCN0000072262	LUCIFERASE	control	23999960	25819800	14100840	15403320	15033960	24909880	14846040	0.59599	18871576	1.2863
	CTR01_1	H	2	promegaLuc_164s1c1	TRCN0000072263	LUCIFERASE	control	20754880	23327400	15172640	15093960	13455200	22041140	1.45739e+07	0.661215	17560816	1.19696
	CTR01_1	H	3	promegaLuc_160s1c1	TRCN0000072264	LUCIFERASE	control	28065320	30690720	16246680	12207200	20050720	29378020	16168200	0.55035	21452128	1.46219
	CTR01_1	H	4	promegaLuc_1546s1c1	TRCN0000072265	LUCIFERASE	control	16702400	19356200	14479360	10409600	10274200	18029300	1.17211e+07	0.650111	14244352	0.970906
	CTR01_1	H	5	promegaLuc_743s1c1	TRCN0000072266	LUCIFERASE	control	24242840	26517360	19233760	21032840	20341720	25380100	2.02028e+07	0.796008	22273704	1.51819
	CTR01_1	H	6	promegaLuc_34s1c1	TRCN0000072267	LUCIFERASE	control	26763280	32061200	26479720	24190840	21742960	29412240	24137840	0.820673	26247600	1.78906
	CTR01_2	F	6	promegaLuc_168s1c1	TRCN0000072243	LUCIFERASE	control	21682400	20975360	16028560	21338800	17042280	21328880	1.81365e+07	0.850328	19413480	1.32324
	CTR01_2	F	7	promegaLuc_224s1c1	TRCN0000072244	LUCIFERASE	control	21292000	20288280	15892320	15438760	12822160	20790140	1.47177e+07	0.70792	17146704	1.16873
	CTR01_2	F	8	promegaLuc_225s1c1	TRCN0000072245	LUCIFERASE	control	21882360	23105760	11480840	19183680	16285600	22494060	15650040	0.695741	18387648	1.25332
	CTR01_2	F	9	promegaLuc_221s1c1	TRCN0000072246	LUCIFERASE	control	22195960	19034720	10281120	15847880	16387600	20615340	14172200	0.687459	16749456	1.14166
	CTR01_2	F	10	promegaLuc_230s1c1	TRCN0000072247	LUCIFERASE	control	16299840	17873440	4284880	9030160	9510440	17086640	7.60849e+06	0.445289	11399752	0.777016
	CTR01_2	F	11	promegaLuc_1510s1c1	TRCN0000072248	LUCIFERASE	control	18007760	21573200	8145600	14776200	10169000	19790480	1.10303e+07	0.557352	14534352	0.990672
	CTR01_2	F	12	promegaLuc_976s1c1	TRCN0000072249	LUCIFERASE	control	15097160	21437480	8147400	17129560	15694720	18267320	1.36572e+07	0.747632	15501264	1.05658
	CTR01_2	G	1	promegaLuc_229s1c1	TRCN0000072250	LUCIFERASE	control	20351920	20853400	695240	1721880	1263760	20602660	1226960	0.0595535	8977240	0.611895
	CTR01_2	G	2	promegaLuc_163s1c1	TRCN0000072251	LUCIFERASE	control	19655000	20815200	10297200	13992600	13615680	20235100	12635160	0.624418	15675136	1.06843
	CTR01_2	G	3	promegaLuc_154s1c1	TRCN0000072252	LUCIFERASE	control	21414040	22499080	12526200	16363120	14310640	21956560	1.44e+07	0.65584	17422616	1.18754
	CTR01_2	G	4	promegaLuc_754s1c1	TRCN0000072253	LUCIFERASE	control	19752480	19932760	16102720	18884320	18133440	19842620	1.77068e+07	0.892363	18561144	1.26514
	CTR01_2	G	5	promegaLuc_745s1c1	TRCN0000072254	LUCIFERASE	control	18883960	16322520	7942080	11864960	13584480	17603240	1.11305e+07	0.632299	13719600	0.935138
	CTR01_2	G	6	promegaLuc_601s1c1	TRCN0000072255	LUCIFERASE	control	12880080	11153960	2132320	2462360	1289840	12017020	1.96151e+06	0.163227	5983712	0.407854
	CTR01_2	G	7	promegaLuc_158s1c1	TRCN0000072256	LUCIFERASE	control	19015720	20597960	12510760	16712960	13723320	19806840	14315680	0.722764	16512144	1.12548
	CTR01_2	G	8	promegaLuc_162s1c1	TRCN0000072257	LUCIFERASE	control	13373520	15325080	2026040	11055680	6487160	14349300	6522960	0.454584	9653496	0.657989
	CTR01_2	G	9	promegaLuc_1193s1c1	TRCN0000072258	LUCIFERASE	control	14719000	16010560	3728720	5557400	4980440	15364780	4755520	0.309508	8999224	0.613394
	CTR01_2	G	10	promegaLuc_159s1c1	TRCN0000072259	LUCIFERASE	control	16011480	19222400	8860440	17022080	16142240	17616940	1.40083e+07	0.795158	15451728	1.0532
	CTR01_2	G	11	promegaLuc_228s1c1	TRCN0000072260	LUCIFERASE	control	14796840	18131120	8868840	12139400	9305600	16463980	1.01046e+07	0.613741	12648360	0.862122
	CTR01_2	G	12	promegaLuc_755s1c1	TRCN0000072261	LUCIFERASE	control	16289880	18566360	16199320	19616280	17602000	17428120	1.78059e+07	1.02167	17654768	1.20336
	CTR01_2	H	1	promegaLuc_153s1c1	TRCN0000072262	LUCIFERASE	control	20035520	20345360	1383200	8618960	7537800	20190440	5.84665e+06	0.289575	11584168	0.789585
	CTR01_2	H	2	promegaLuc_164s1c1	TRCN0000072263	LUCIFERASE	control	17739280	19142200	7272560	14632520	12998480	18440740	11634520	0.630914	14357008	0.978584
	CTR01_2	H	3	promegaLuc_160s1c1	TRCN0000072264	LUCIFERASE	control	20047320	21368000	903440	11698960	11475280	20707660	8.02589e+06	0.387581	13098600	0.89281
	CTR01_2	H	4	promegaLuc_1546s1c1	TRCN0000072265	LUCIFERASE	control	16278160	17402560	5026720	13680240	130040	16840360	6279000	0.372854	10503544	0.715929
	CTR01_2	H	5	promegaLuc_743s1c1	TRCN0000072266	LUCIFERASE	control	20315880	21168800	11615480	16158160	14460120	20742340	14077920	0.678705	16743688	1.14126
	CTR01_2	H	6	promegaLuc_34s1c1	TRCN0000072267	LUCIFERASE	control	22756840	23853800	15549400	21146160	19795800	23305320	1.88305e+07	0.807989	20620400	1.4055
	CTR01_1	C	2	rfp_283s1c1	TRCN0000072203	RFP	control	15192880	16920960	6008400	5601320	4629040	16056920	5412920	0.337108	9670520	0.65915
	CTR01_1	C	3	rfp_189s1c1	TRCN0000072204	RFP	control	19157960	18384680	12879960	5831800	7978800	18771320	8.89685e+06	0.47396	12846640	0.875637
	CTR01_1	C	4	rfp_59s1c1	TRCN0000072205	RFP	control	14693160	21155280	18541240	4755080	9859600	17924220	1.1052e+07	0.616594	13800872	0.940678
	CTR01_1	C	5	rfp_276s1c1	TRCN0000072206	RFP	control	2006160	10128680	240240	306360	108640	6067420	218413	0.0359977	2558016	0.174356
	CTR01_1	C	7	rfp_269s1c1	TRCN0000072208	RFP	control	24641360	36471000	21043800	12113280	2537520	30556180	11898200	0.389388	19361392	1.31969
	CTR01_1	C	8	rfp_188s1c1	TRCN0000072209	RFP	control	21483720	25463120	22762920	14964840	12797040	23473420	16841600	0.717475	19494328	1.32875
	CTR01_1	C	9	rfp_402s1c1	TRCN0000072210	RFP	control	22365200	23675480	16966440	9225320	9159280	23020340	11783680	0.511881	16278344	1.10954
	CTR01_1	C	10	rfp_621s1c1	TRCN0000072211	RFP	control	752440	2066120	561600	335520	378960	1409280	425360	0.301828	818928	0.0558187
	CTR01_1	C	11	rfp_401s1c1	TRCN0000072212	RFP	control	17709880	20846640	15229240	16087920	11722880	19278260	14346680	0.74419	16319312	1.11234
	CTR01_1	C	12	rfp_620s1c1	TRCN0000072213	RFP	control	5302320	3899720	1057080	1193800	939680	4601020	1063520	0.231149	2478520	0.168938
	CTR01_1	D	2	rfp_403s1c1	TRCN0000072215	RFP	control	19952440	23952120	7573080	8151840	7155320	21952280	7.62675e+06	0.347424	13356960	0.91042
	CTR01_1	D	3	rfp_513s1c1	TRCN0000072216	RFP	control	21652720	25018320	17753240	13875640	13593320	23335520	1.50741e+07	0.645971	18378648	1.2527
	CTR01_1	D	4	rfp_612s1c1	TRCN0000072217	RFP	control	12650680	12602240	647200	402520	645880	12626460	565200	0.0447631	5389704	0.367366
	CTR01_1	D	5	rfp_66s1c1	TRCN0000072218	RFP	control	20587800	25652720	7692720	8295320	10262440	23120260	8750160	0.378463	14498200	0.988208
	CTR01_1	D	6	rfp_576s1c1	TRCN0000072219	RFP	control	9002560	12408280	6664480	4821280	4955760	10705420	5.48051e+06	0.511938	7570472	0.516009
	CTR01_1	D	8	rfp_407s1c1	TRCN0000072221	RFP	control	35395400	40867640	34938680	31631240	15279800	38131520	27283240	0.715504	31622552	2.15542
	CTR01_2	C	2	rfp_283s1c1	TRCN0000072203	RFP	control	8901280	15655200	5496480	8003800	9270200	12278240	7590160	0.61818	9465392	0.645168
	CTR01_2	C	3	rfp_189s1c1	TRCN0000072204	RFP	control	8968720	16839880	9529160	12316480	9003240	12904300	10282960	0.796863	11331496	0.772363
	CTR01_2	C	4	rfp_59s1c1	TRCN0000072205	RFP	control	15027200	18607920	9288520	16070880	12927800	16817560	12762400	0.758873	14384464	0.980456
	CTR01_2	C	5	rfp_276s1c1	TRCN0000072206	RFP	control	2326520	10632640	500440	1644840	698520	6479580	947933	0.146295	3160592	0.215428
	CTR01_2	C	7	rfp_269s1c1	TRCN0000072208	RFP	control	14890760	21228400	16518280	21819400	12390320	18059580	1.69093e+07	0.936308	17369432	1.18391
	CTR01_2	C	8	rfp_188s1c1	TRCN0000072209	RFP	control	16235000	15940480	13148960	17185760	13281360	16087740	1.45387e+07	0.903713	15158312	1.0332
	CTR01_2	C	9	rfp_402s1c1	TRCN0000072210	RFP	control	17217280	18896160	17419200	17957160	20481560	18056720	1.86193e+07	1.03116	18394272	1.25377
	CTR01_2	C	10	rfp_621s1c1	TRCN0000072211	RFP	control	3165960	4164160	456480	528400	343960	3665060	442947	0.120857	1731792	0.11804
	CTR01_2	C	11	rfp_401s1c1	TRCN0000072212	RFP	control	13594960	20335880	13776720	19772560	9909760	16965420	1.44863e+07	0.853875	15477976	1.05499
	CTR01_2	C	12	rfp_620s1c1	TRCN0000072213	RFP	control	3066160	13242880	1305680	2466800	1530440	8154520	1767640	0.216768	4322392	0.294617
	CTR01_2	D	2	rfp_403s1c1	TRCN0000072215	RFP	control	16973920	20847960	14225440	17547040	12969640	18910940	14914040	0.788646	16512800	1.12552
	CTR01_2	D	3	rfp_513s1c1	TRCN0000072216	RFP	control	17426560	19141800	15338160	17488120	18081800	18284180	16969360	0.92809	17495288	1.19249
	CTR01_2	D	4	rfp_612s1c1	TRCN0000072217	RFP	control	4453000	13080960	1058040	2115560	2178400	8766980	1784000	0.203491	4577192	0.311985
	CTR01_2	D	5	rfp_66s1c1	TRCN0000072218	RFP	control	12163800	17776120	10405560	16298560	15006560	14969960	13903560	0.928764	14330120	0.976752
	CTR01_2	D	6	rfp_576s1c1	TRCN0000072219	RFP	control	11013200	20048280	8830880	12836880	7204880	15530740	9.62421e+06	0.619688	11986824	0.817031
	CTR01_2	D	8	rfp_407s1c1	TRCN0000072221	RFP	control	19544840	20485240	21225600	21700440	20241080	20015040	2.10557e+07	1.05199	20639440	1.4068
	CTR01_1	B	2				no virus	27031200	30764960	10229120	4475600	8444040	28898080	7.71625e+06	0.267016
	CTR01_1	C	6				no virus	33575600	39477720	15601440	7957360	3778160	36526660	9112320	0.24947
	CTR01_1	D	1				no virus	28830520	32978000	136520	108280	189640	30904260	144813	0.00468587
	CTR01_1	D	7				no virus	33308720	37552200	7143600	2729840	6316360	35430460	5396600	0.152315
	CTR01_1	D	9				no virus	31902640	35949440	186880	157720	129200	33926040	157933	0.00465522
	CTR01_1	H	7				no virus	28753360	33635160	26803600	27248040	25891120	31194260	2.66476e+07	0.854246
	CTR01_1	H	8				no virus	28748120	31853240	33240760	32011200	24830800	30300680	3.00276e+07	0.990987
	CTR01_1	H	9				no virus	28326240	31527640	33038760	30942040	26139680	29926940	30040160	1.00378
	CTR01_1	H	10				no virus	28371560	31637400	31227320	22638880	26453400	30004480	26773200	0.892307
	CTR01_1	H	11				no virus	27457200	31048720	11542360	14514680	19288880	29252960	1.51153e+07	0.51671
	CTR01_1	H	12				no virus	25261800	28234960	15327400	12563720	18808360	26748380	1.55665e+07	0.58196
	CTR01_2	B	2				no virus	19757200	20624680	1823880	2868520	1732640	20190940	2141680	0.106071
	CTR01_2	C	6				no virus	21460400	21805360	2859280	6598840	4306520	21632880	4.58821e+06	0.212094
	CTR01_2	D	1				no virus	21496040	21512920	95760	122800	174720	21504480	131093	0.00609609
	CTR01_2	D	7				no virus	20494480	23371640	682640	1268440	543440	21933060	831507	0.0379111
	CTR01_2	D	9				no virus	21660640	21765000	116840	152760	144320	21712820	137973	0.00635446
	CTR01_2	H	7				no virus	22324720	21681160	15907000	19829080	18035840	22002940	1.7924e+07	0.814617
	CTR01_2	H	8				no virus	21796720	21486480	19006440	21383440	22697680	21641600	2.10292e+07	0.971702
	CTR01_2	H	9				no virus	21293760	20555600	20375880	21358880	22339160	20924680	2.1358e+07	1.02071
	CTR01_2	H	10				no virus	21495120	21421600	11660680	19469120	16218720	21458360	15782840	0.73551
	CTR01_2	H	11				no virus	21229920	20514040	3893880	9171840	5809160	20871980	6.29163e+06	0.301439
	CTR01_2	H	12				no virus	19746080	18261120	4617760	12248520	11162560	19003600	9.34295e+06	0.491641
