# Supplementary material for: Functional genomic screening reveals asparagine dependence as a metabolic vulnerability in sarcoma
Source: eLife. 2015 Oct 24;4:e09436. doi: 10.7554/eLife.09436 (PMC4695385; doi:10.7554/eLife.09436)
Supplement: Supplementary file 4. — DOI: http://dx.doi.org/10.7554/eLife.09436.017 [file elife-09436-supp4.xlsx]

## Sheet: Sheet1
	Supplementary File 4: Kras; p16p19null non-myogenic sarcoma cell line Sca1-01: raw data from shRNA screen (control plate CTR01).
	Plate ID	Row	Column	Clone Name	Clone ID	Symbol	Taxon ID	(-) Puro	(-) Puro	(+) Puro	(+) Puro	Average(-)	Average (+)	C.C.	Average	% of control
	CTR01_1	A	1	TRCN0000072178	clonetechGfp_438s1c1	GFP	control	7359960	3373880	3190480	3391120	5366920	3290800	0.613164	4328860	0.336158
	CTR01_1	A	2	TRCN0000072179	clonetechGfp_228s1c1	GFP	control	6738760	3830600	1433240	2581240	5284680	2007240	0.379822	3645960	0.283127
	CTR01_1	A	3	TRCN0000072180	clonetechGfp_453s1c1	GFP	control	7935680	5407680	3039640	5328800	6671680	4184220	0.627161	5427950	0.421507
	CTR01_1	A	4	TRCN0000072181	clonetechGfp_437s1c1	GFP	control	1599120	5495040	1496760	1807960	3547080	1652360	0.465837	2599720	0.201881
	CTR01_1	A	5	TRCN0000072182	clonetechGfp_693s1c1	GFP	control	14350840	14557920	14455000	15204920	14454380	14829960	1.02598	14642170	1.13704
	CTR01_1	A	6	TRCN0000072183	clonetechGfp_696s1c1	GFP	control	3203160	6234160	1490480	1550320	4718660	1520400	0.32221	3119530	0.242247
	CTR01_1	A	7	TRCN0000072184	clonetechGfp_684s1c1	GFP	control	7319600	7094120	6719240	7971880	7206860	7345560	1.01925	7276210	0.565034
	CTR01_1	A	8	TRCN0000072185	clonetechGfp_436s1c1	GFP	control	537200	1149080	187720	418920	843140	303320	0.35975	573230	0.0445142
	CTR01_1	A	9	TRCN0000072186	clonetechGfp_587s1c1	GFP	control	8245320	8453720	8392880	8168080	8349520	8280480	0.991731	8315000	0.645701
	CTR01_1	A	10	TRCN0000072187	clonetechGfp_692s1c1	GFP	control	16575200	14640840	18681040	18047960	15608020	18364500	1.17661	16986260	1.31907
	CTR01_1	A	11	TRCN0000072188	clonetechGfp_226s1c1	GFP	control	9136240	7695800	7942040	8629000	8416020	8285520	0.984494	8350770	0.648479
	CTR01_1	A	12	TRCN0000072189	clonetechGfp_197s1c1	GFP	control	9224720	5554480	7553520	6881320	7389600	7217420	0.9767	7303510	0.567154
	CTR01_1	B	1	TRCN0000072190	clonetechGfp_229s1c1	GFP	control	5583960	1858800	1313840	704720	3721380	1009280	0.271211	2365330	0.18368
	CTR01_1	B	3	TRCN0000072192	clonetechGfp_477s1c1	GFP	control	1412480	180600	297720	544160	796540	420940	0.528461	608740	0.0472717
	CTR01_1	B	4	TRCN0000072193	clonetechGfp_63s1c1	GFP	control	1398720	1293440	1635000	2669360	1346080	2152180	1.59885	1749130	0.135829
	CTR01_1	B	5	TRCN0000072194	clonetechGfp_231s1c1	GFP	control	4539240	2847600	5286800	6540120	3693420	5913460	1.60108	4803440	0.373011
	CTR01_1	B	6	TRCN0000072195	clonetechGfp_62s1c1	GFP	control	2308720	2550280	2902320	4221960	2429500	3562140	1.4662	2995820	0.23264
	CTR01_1	B	7	TRCN0000072196	clonetechGfp_449s1c1	GFP	control	6216680	5329440	6506520	6631960	5773060	6569240	1.13791	6171150	0.479221
	CTR01_1	B	8	TRCN0000072197	clonetechGfp_117s1c1	GFP	control	10286800	8325000	12316920	12464680	9305900	12390800	1.3315	10848350	0.842429
	CTR01_1	B	9	TRCN0000072198	clonetechGfp_645s1c1	GFP	control	4420640	3498000	4128160	5146560	3959320	4637360	1.17125	4298340	0.333788
	CTR01_1	B	10	TRCN0000072199	clonetechGfp_128s1c1	GFP	control	8120320	3940280	5306240	7747040	6030300	6526640	1.08231	6278470	0.487555
	CTR01_1	B	11	TRCN0000072200	clonetechGfp_428s1c1	GFP	control	3004000	4177080	4382600	3939200	3590540	4160900	1.15885	3875720	0.300969
	CTR01_1	B	12	TRCN0000072201	clonetechGfp_49s1c1	GFP	control	5821600	4400360	4910120	6414800	5110980	5662460	1.1079	5386720	0.418306
	CTR01_1	C	1	TRCN0000072202	clonetechGfp_506s1c1	GFP	control	6620720	3409800	7168800	7334240	5015260	7251520	1.44589	6133390	0.476288
	CTR01_2	A	1	TRCN0000072178	clonetechGfp_438s1c1	GFP	control	4625560	4818320	1637400	1427760	4721940	1532580	0.324566	3127260	0.242847
	CTR01_2	A	2	TRCN0000072179	clonetechGfp_228s1c1	GFP	control	6279200	10560400	2035200	1662280	8419800	1848740	0.219571	5134270	0.398702
	CTR01_2	A	3	TRCN0000072180	clonetechGfp_453s1c1	GFP	control	5644560	10820000	1634600	2954880	8232280	2294740	0.278749	5263510	0.408738
	CTR01_2	A	4	TRCN0000072181	clonetechGfp_437s1c1	GFP	control	2068560	4005960	394440	397280	3037260	395860	0.130335	1716560	0.133299
	CTR01_2	A	5	TRCN0000072182	clonetechGfp_693s1c1	GFP	control	11941840	14738880	13694840	10391520	13340360	12043180	0.902763	12691770	0.985579
	CTR01_2	A	6	TRCN0000072183	clonetechGfp_696s1c1	GFP	control	5314320	5455320	1178440	791120	5384820	984780	0.182881	3184800	0.247316
	CTR01_2	A	7	TRCN0000072184	clonetechGfp_684s1c1	GFP	control	2962320	13426640	2431200	3338120	8194480	2884660	0.352025	5539570	0.430175
	CTR01_2	A	8	TRCN0000072185	clonetechGfp_436s1c1	GFP	control	136520	4376560	190400	134080	2256540	162240	0.0718977	1209390	0.0939152
	CTR01_2	A	9	TRCN0000072186	clonetechGfp_587s1c1	GFP	control	5503960	9238680	2953440	2001720	7371320	2477580	0.336111	4924450	0.382408
	CTR01_2	A	10	TRCN0000072187	clonetechGfp_692s1c1	GFP	control	12198600	15664400	13358160	13154440	13931500	13256300	0.951534	13593900	1.05563
	CTR01_2	A	11	TRCN0000072188	clonetechGfp_226s1c1	GFP	control	6034200	6347360	3184080	2962480	6190780	3073280	0.496429	4632030	0.3597
	CTR01_2	A	12	TRCN0000072189	clonetechGfp_197s1c1	GFP	control	8459160	7932600	4514080	3589880	8195880	4051980	0.494392	6123930	0.475554
	CTR01_2	B	1	TRCN0000072190	clonetechGfp_229s1c1	GFP	control	1791520	6980600	724360	876360	4386060	800360	0.182478	2593210	0.201376
	CTR01_2	B	3	TRCN0000072192	clonetechGfp_477s1c1	GFP	control	932920	3135960	230840	233960	2034440	232400	0.114233	1133420	0.0880157
	CTR01_2	B	4	TRCN0000072193	clonetechGfp_63s1c1	GFP	control	2723600	4031360	1747160	1632600	3377480	1689880	0.500338	2533680	0.196753
	CTR01_2	B	5	TRCN0000072194	clonetechGfp_231s1c1	GFP	control	4441040	4849400	3804800	3501240	4645220	3653020	0.786404	4149120	0.3222
	CTR01_2	B	6	TRCN0000072195	clonetechGfp_62s1c1	GFP	control	3457720	3211360	2052560	1673200	3334540	1862880	0.558662	2598710	0.201803
	CTR01_2	B	7	TRCN0000072196	clonetechGfp_449s1c1	GFP	control	3655680	5486640	3301120	3039160	4571160	3170140	0.693509	3870650	0.300575
	CTR01_2	B	8	TRCN0000072197	clonetechGfp_117s1c1	GFP	control	8085920	11306760	7931440	7370200	9696340	7650820	0.789042	8673580	0.673547
	CTR01_2	B	9	TRCN0000072198	clonetechGfp_645s1c1	GFP	control	3812880	4516040	2246920	3178760	4164460	2712840	0.651427	3438650	0.267028
	CTR01_2	B	10	TRCN0000072199	clonetechGfp_128s1c1	GFP	control	2595720	5822760	2611560	1504560	4209240	2058060	0.488939	3133650	0.243344
	CTR01_2	B	11	TRCN0000072200	clonetechGfp_428s1c1	GFP	control	3388320	4198840	1282000	1151240	3793580	1216620	0.320705	2505100	0.194534
	CTR01_2	B	12	TRCN0000072201	clonetechGfp_49s1c1	GFP	control	7782800	5878760	2463520	1576200	6830780	2019860	0.2957	4425320	0.343648
	CTR01_2	C	1	TRCN0000072202	clonetechGfp_506s1c1	GFP	control	3672240	8288560	1781000	2754520	5980400	2267760	0.379199	4124080	0.320255
	CTR01_1	D	10	TRCN0000072223	lacZ_1168s1c1	lacZ	control	17600440	9395640	17383880	21613560	13498040	19498720	1.44456	16498380	1.28118
	CTR01_1	D	11	TRCN0000072224	lacZ_1339s1c1	lacZ	control	28326800	24341840	27187360	25750640	26334320	26469000	1.00511	26401660	2.05022
	CTR01_1	D	12	TRCN0000072225	lacZ_2083s1c1	lacZ	control	20596400	18599360	22293040	20679080	19597880	21486060	1.09635	20541970	1.59519
	CTR01_1	E	1	TRCN0000072226	lacZ_1341s1c1	lacZ	control	18461400	9828360	17017520	17643240	14144880	17330380	1.22521	15737630	1.22211
	CTR01_1	E	2	TRCN0000072227	lacZ_1397s1c1	lacZ	control	7576880	6875560	5972320	6612520	7226220	6292420	0.870776	6759320	0.524895
	CTR01_1	E	3	TRCN0000072228	lacZ_2082s1c1	lacZ	control	10943120	9121600	10533320	10777240	10032360	10655280	1.06209	10343820	0.803249
	CTR01_1	E	4	TRCN0000072229	lacZ_1340s1c1	lacZ	control	25162480	22709160	25397040	25025440	23935820	25211240	1.05328	24573530	1.90826
	CTR01_1	E	5	TRCN0000072230	lacZ_3003s1c1	lacZ	control	12222760	7394960	9260680	13191680	9808860	11226180	1.14449	10517520	0.816738
	CTR01_1	E	6	TRCN0000072231	lacZ_1650s1c1	lacZ	control	26944480	25574720	27771760	25143400	26259600	26457580	1.00754	26358590	2.04688
	CTR01_1	E	7	TRCN0000072232	lacZ_27s1c1	lacZ	control	24974720	22766000	24449760	25159360	23870360	24804560	1.03914	24337460	1.88993
	CTR01_1	E	8	TRCN0000072233	lacZ_656s1c1	lacZ	control	13681480	5709720	8971560	13165240	9695600	11068400	1.14159	10382000	0.806214
	CTR01_1	E	9	TRCN0000072234	lacZ_14s1c1	lacZ	control	4899560	3929160	5158960	5699720	4414360	5429340	1.22993	4921850	0.382206
	CTR01_1	E	10	TRCN0000072235	lacZ_1935s1c1	lacZ	control	9164720	6696120	9192760	10811960	7930420	10002360	1.26126	8966390	0.696285
	CTR01_1	E	11	TRCN0000072236	lacZ_305s1c1	lacZ	control	13860520	8789760	13979120	15161920	11325140	14570520	1.28656	12947830	1.00546
	CTR01_1	E	12	TRCN0000072237	lacZ_816s1c1	lacZ	control	17578520	12946360	18334120	18163800	15262440	18248960	1.19568	16755700	1.30116
	CTR01_1	F	1	TRCN0000072238	lacZ_1932s1c1	lacZ	control	2200720	4439800	3063520	4649600	3320260	3856560	1.16152	3588410	0.278658
	CTR01_1	F	2	TRCN0000072239	lacZ_25s1c1	lacZ	control	11604720	17965040	13240360	18514760	14784880	15877560	1.07391	15331220	1.19055
	CTR01_1	F	3	TRCN0000072240	lacZ_29s1c1	lacZ	control	22237600	19836960	23209640	24700720	21037280	23955180	1.1387	22496230	1.74694
	CTR01_1	F	4	TRCN0000072241	lacZ_2265s1c1	lacZ	control	10987320	7818320	9905840	11428040	9402820	10666940	1.13444	10034880	0.779259
	CTR01_1	F	5	TRCN0000072242	lacZ_1758s1c1	lacZ	control	2724920	3539320	3649200	6433760	3132120	5041480	1.60961	4086800	0.31736
	CTR01_2	D	10	TRCN0000072223	lacZ_1168s1c1	lacZ	control	14221840	19555680	16095880	9415360	16888760	12755620	0.755273	14822190	1.15102
	CTR01_2	D	11	TRCN0000072224	lacZ_1339s1c1	lacZ	control	23915360	24304000	22929520	19261320	24109680	21095420	0.874977	22602550	1.7552
	CTR01_2	D	12	TRCN0000072225	lacZ_2083s1c1	lacZ	control	15434640	18584800	15167920	15368600	17009720	15268260	0.89762	16138990	1.25327
	CTR01_2	E	1	TRCN0000072226	lacZ_1341s1c1	lacZ	control	11098280	11357680	9989200	7954280	11227980	8971740	0.799052	10099860	0.784305
	CTR01_2	E	2	TRCN0000072227	lacZ_1397s1c1	lacZ	control	11130360	8192120	8146440	4130720	9661240	6138580	0.635382	7899910	0.613468
	CTR01_2	E	3	TRCN0000072228	lacZ_2082s1c1	lacZ	control	10709160	12785360	11486360	7986640	11747260	9736500	0.828832	10741880	0.834161
	CTR01_2	E	4	TRCN0000072229	lacZ_1340s1c1	lacZ	control	20521120	22385440	15963640	19376160	21453280	17669900	0.823646	19561590	1.51906
	CTR01_2	E	5	TRCN0000072230	lacZ_3003s1c1	lacZ	control	10640640	12525360	6780240	9683480	11583000	8231860	0.710685	9907430	0.769361
	CTR01_2	E	6	TRCN0000072231	lacZ_1650s1c1	lacZ	control	20772840	22131560	20626960	19904000	21452200	20265480	0.944681	20858840	1.61979
	CTR01_2	E	7	TRCN0000072232	lacZ_27s1c1	lacZ	control	20025320	18636560	19169360	18246280	19330940	18707820	0.967766	19019380	1.47695
	CTR01_2	E	8	TRCN0000072233	lacZ_656s1c1	lacZ	control	13771680	12543720	10466640	9906080	13157700	10186360	0.774175	11672030	0.906392
	CTR01_2	E	9	TRCN0000072234	lacZ_14s1c1	lacZ	control	7139440	8962480	4508960	4611080	8050960	4560020	0.566395	6305490	0.489653
	CTR01_2	E	10	TRCN0000072235	lacZ_1935s1c1	lacZ	control	9155640	11726440	6915880	7749200	10441040	7332540	0.702281	8886790	0.690104
	CTR01_2	E	11	TRCN0000072236	lacZ_305s1c1	lacZ	control	12262280	14707280	8755080	11386600	13484780	10070840	0.74683	11777810	0.914606
	CTR01_2	E	12	TRCN0000072237	lacZ_816s1c1	lacZ	control	11016960	15525240	8279200	11642760	13271100	9960980	0.750577	11616040	0.902044
	CTR01_2	F	1	TRCN0000072238	lacZ_1932s1c1	lacZ	control	6530080	8565480	3008680	2629920	7547780	2819300	0.373527	5183540	0.402528
	CTR01_2	F	2	TRCN0000072239	lacZ_25s1c1	lacZ	control	15701040	14387680	11847680	11220760	15044360	11534220	0.766681	13289290	1.03198
	CTR01_2	F	3	TRCN0000072240	lacZ_29s1c1	lacZ	control	18746840	16785120	18422920	14124320	17765980	16273620	0.915999	17019800	1.32167
	CTR01_2	F	4	TRCN0000072241	lacZ_2265s1c1	lacZ	control	10113280	10712240	7538360	7512080	10412760	7525220	0.722692	8968990	0.696487
	CTR01_2	F	5	TRCN0000072242	lacZ_1758s1c1	lacZ	control	7652200	10730200	4548800	4138120	9191200	4343460	0.472567	6767330	0.525517
	CTR01_1	F	6	TRCN0000072243	promegaLuc_168s1c1	LUCIFERASE	control	18993840	19120160	18875440	19852440	19057000	19363940	1.01611	19210470	1.49179
	CTR01_1	F	7	TRCN0000072244	promegaLuc_224s1c1	LUCIFERASE	control	15407880	9599480	12239600	18937120	12503680	15588360	1.2467	14046020	1.09074
	CTR01_1	F	8	TRCN0000072245	promegaLuc_225s1c1	LUCIFERASE	control	16371280	12403680	15095080	21526080	14387480	18310580	1.27267	16349030	1.26958
	CTR01_1	F	9	TRCN0000072246	promegaLuc_221s1c1	LUCIFERASE	control	19081320	14231520	14715080	20008240	16656420	17361660	1.04234	17009040	1.32084
	CTR01_1	F	10	TRCN0000072247	promegaLuc_230s1c1	LUCIFERASE	control	9131000	9292360	7301080	10948040	9211680	9124560	0.990542	9168120	0.71195
	CTR01_1	F	11	TRCN0000072248	promegaLuc_1510s1c1	LUCIFERASE	control	16191760	14890520	16423840	17655800	15541140	17039820	1.09643	16290480	1.26504
	CTR01_1	F	12	TRCN0000072249	promegaLuc_976s1c1	LUCIFERASE	control	19544080	22242960	21775600	23798600	20893520	22787100	1.09063	21840310	1.69601
	CTR01_1	G	1	TRCN0000072250	promegaLuc_229s1c1	LUCIFERASE	control	21277480	19740960	21212000	21042600	20509220	21127300	1.03014	20818260	1.61664
	CTR01_1	G	2	TRCN0000072251	promegaLuc_163s1c1	LUCIFERASE	control	14478240	13991480	13619720	14084200	14234860	13851960	0.973101	14043410	1.09054
	CTR01_1	G	3	TRCN0000072252	promegaLuc_154s1c1	LUCIFERASE	control	12602000	17669960	13853480	18870280	15135980	16361880	1.08099	15748930	1.22298
	CTR01_1	G	4	TRCN0000072253	promegaLuc_754s1c1	LUCIFERASE	control	10861000	15181680	11510400	15006600	13021340	13258500	1.01821	13139920	1.02038
	CTR01_1	G	5	TRCN0000072254	promegaLuc_745s1c1	LUCIFERASE	control	19437920	18487880	19724400	23716960	18962900	21720680	1.14543	20341790	1.57964
	CTR01_1	G	6	TRCN0000072255	promegaLuc_601s1c1	LUCIFERASE	control	1694120	2055640	654640	1906240	1874880	1280440	0.682945	1577660	0.122513
	CTR01_1	G	7	TRCN0000072256	promegaLuc_158s1c1	LUCIFERASE	control	14865240	16409360	14721560	16063680	15637300	15392620	0.984353	15514960	1.20481
	CTR01_1	G	8	TRCN0000072257	promegaLuc_162s1c1	LUCIFERASE	control	10688840	14980920	6660000	14818880	12834880	10739440	0.836739	11787160	0.915332
	CTR01_1	G	9	TRCN0000072258	promegaLuc_1193s1c1	LUCIFERASE	control	14968440	18299080	7343640	22717160	16633760	15030400	0.903608	15832080	1.22944
	CTR01_1	G	10	TRCN0000072259	promegaLuc_159s1c1	LUCIFERASE	control	17799000	17750760	17627040	18097360	17774880	17862200	1.00491	17818540	1.3837
	CTR01_1	G	11	TRCN0000072260	promegaLuc_228s1c1	LUCIFERASE	control	18508320	15443760	14754320	19599440	16976040	17176880	1.01183	17076460	1.32607
	CTR01_1	G	12	TRCN0000072261	promegaLuc_755s1c1	LUCIFERASE	control	23002400	18174160	22861200	23802800	20588280	23332000	1.13327	21960140	1.70531
	CTR01_1	H	1	TRCN0000072262	promegaLuc_153s1c1	LUCIFERASE	control	18259360	16224240	13360360	16057560	17241800	14708960	0.853099	15975380	1.24057
	CTR01_1	H	2	TRCN0000072263	promegaLuc_164s1c1	LUCIFERASE	control	15319960	15833200	15342360	16244600	15576580	15793480	1.01392	15685030	1.21802
	CTR01_1	H	3	TRCN0000072264	promegaLuc_160s1c1	LUCIFERASE	control	23058120	19922440	24808320	28015000	21490280	26411660	1.229	23950970	1.85991
	CTR01_1	H	4	TRCN0000072265	promegaLuc_1546s1c1	LUCIFERASE	control	8546000	10986080	7322680	10963160	9766040	9142920	0.936195	9454480	0.734188
	CTR01_1	H	5	TRCN0000072266	promegaLuc_743s1c1	LUCIFERASE	control	14115920	14688560	14252240	15489600	14402240	14870920	1.03254	14636580	1.1366
	CTR01_1	H	6	TRCN0000072267	promegaLuc_34s1c1	LUCIFERASE	control	21623480	22573400	19685640	25261920	22098440	22473780	1.01698	22286110	1.73063
	CTR01_2	F	6	TRCN0000072243	promegaLuc_168s1c1	LUCIFERASE	control	17002080	15678920	16051440	13502040	16340500	14776740	0.904302	15558620	1.2082
	CTR01_2	F	7	TRCN0000072244	promegaLuc_224s1c1	LUCIFERASE	control	11913120	9865080	8393120	7281000	10889100	7837060	0.719716	9363080	0.72709
	CTR01_2	F	8	TRCN0000072245	promegaLuc_225s1c1	LUCIFERASE	control	11595840	17671240	10652280	8815040	14633540	9733660	0.665161	12183600	0.946117
	CTR01_2	F	9	TRCN0000072246	promegaLuc_221s1c1	LUCIFERASE	control	16297440	19822520	12920880	9897120	18059980	11409000	0.631728	14734490	1.14421
	CTR01_2	F	10	TRCN0000072247	promegaLuc_230s1c1	LUCIFERASE	control	7220800	12338640	6813880	8048200	9779720	7431040	0.759842	8605380	0.668251
	CTR01_2	F	11	TRCN0000072248	promegaLuc_1510s1c1	LUCIFERASE	control	12761960	15640480	11697360	13076360	14201220	12386860	0.872239	13294040	1.03235
	CTR01_2	F	12	TRCN0000072249	promegaLuc_976s1c1	LUCIFERASE	control	16972680	20359600	14547600	13596640	18666140	14072120	0.753885	16369130	1.27114
	CTR01_2	G	1	TRCN0000072250	promegaLuc_229s1c1	LUCIFERASE	control	17532760	17460840	17833000	12612960	17496800	15222980	0.870044	16359890	1.27043
	CTR01_2	G	2	TRCN0000072251	promegaLuc_163s1c1	LUCIFERASE	control	12207840	13402600	10118040	8948600	12805220	9533320	0.744487	11169270	0.86735
	CTR01_2	G	3	TRCN0000072252	promegaLuc_154s1c1	LUCIFERASE	control	13960280	16197920	11571760	9153400	15079100	10362580	0.687215	12720840	0.987837
	CTR01_2	G	4	TRCN0000072253	promegaLuc_754s1c1	LUCIFERASE	control	14493040	15213160	8866200	9464120	14853100	9165160	0.617054	12009130	0.932569
	CTR01_2	G	5	TRCN0000072254	promegaLuc_745s1c1	LUCIFERASE	control	17835760	14202800	16205000	14332120	16019280	15268560	0.953136	15643920	1.21483
	CTR01_2	G	6	TRCN0000072255	promegaLuc_601s1c1	LUCIFERASE	control	5501320	6952160	937120	1119440	6226740	1028280	0.165139	3627510	0.281694
	CTR01_2	G	7	TRCN0000072256	promegaLuc_158s1c1	LUCIFERASE	control	14155840	14188840	11959160	11324600	14172340	11641880	0.821451	12907110	1.0023
	CTR01_2	G	8	TRCN0000072257	promegaLuc_162s1c1	LUCIFERASE	control	7097080	12009800	6867720	6465960	9553440	6666840	0.697847	8110140	0.629793
	CTR01_2	G	9	TRCN0000072258	promegaLuc_1193s1c1	LUCIFERASE	control	16642360	13554440	9512320	11817680	15098400	10665000	0.706366	12881700	1.00033
	CTR01_2	G	10	TRCN0000072259	promegaLuc_159s1c1	LUCIFERASE	control	13175800	14298000	13432960	12486640	13736900	12959800	0.94343	13348350	1.03657
	CTR01_2	G	11	TRCN0000072260	promegaLuc_228s1c1	LUCIFERASE	control	12726840	14686800	7432840	6430760	13706820	6931800	0.505719	10319310	0.801346
	CTR01_2	G	12	TRCN0000072261	promegaLuc_755s1c1	LUCIFERASE	control	17671320	20624880	16491880	15388840	19148100	15940360	0.832477	17544230	1.3624
	CTR01_2	H	1	TRCN0000072262	promegaLuc_153s1c1	LUCIFERASE	control	16572880	16050120	8914080	9296760	16311500	9105420	0.558221	12708460	0.986875
	CTR01_2	H	2	TRCN0000072263	promegaLuc_164s1c1	LUCIFERASE	control	13628480	14799200	13384920	9259320	14213840	11322120	0.796556	12767980	0.991498
	CTR01_2	H	3	TRCN0000072264	promegaLuc_160s1c1	LUCIFERASE	control	19438320	17146080	17018560	13617760	18292200	15318160	0.837415	16805180	1.30501
	CTR01_2	H	4	TRCN0000072265	promegaLuc_1546s1c1	LUCIFERASE	control	8027120	11709600	5813440	5689720	9868360	5751580	0.58283	7809970	0.606483
	CTR01_2	H	5	TRCN0000072266	promegaLuc_743s1c1	LUCIFERASE	control	12843640	13257640	12176960	10005200	13050640	11091080	0.84985	12070860	0.937363
	CTR01_2	H	6	TRCN0000072267	promegaLuc_34s1c1	LUCIFERASE	control	23930160	20831360	16563160	20091640	22380760	18327400	0.818891	20354080	1.5806
	CTR01_1	C	2	TRCN0000072203	rfp_283s1c1	RFP	control	4535360	2555800	4557040	5756560	3545580	5156800	1.45443	4351190	0.337892
	CTR01_1	C	3	TRCN0000072204	rfp_189s1c1	RFP	control	16744880	11767640	16324120	19348640	14256260	17836380	1.25113	16046320	1.24608
	CTR01_1	C	4	TRCN0000072205	rfp_59s1c1	RFP	control	14632040	11350480	14081360	14177320	12991260	14129340	1.0876	13560300	1.05303
	CTR01_1	C	5	TRCN0000072206	rfp_276s1c1	RFP	control	1322320	2699360	956040	1066520	2010840	1011280	0.502914	1511060	0.117341
	CTR01_1	C	7	TRCN0000072208	rfp_269s1c1	RFP	control	8331880	5399920	9320440	10975840	6865900	10148140	1.47805	8507020	0.660613
	CTR01_1	C	8	TRCN0000072209	rfp_188s1c1	RFP	control	21432400	15735400	21941120	21143520	18583900	21542320	1.15919	20063110	1.558
	CTR01_1	C	9	TRCN0000072210	rfp_402s1c1	RFP	control	14190280	13811120	19443720	18463320	14000700	18953520	1.35376	16477110	1.27953
	CTR01_1	C	10	TRCN0000072211	rfp_621s1c1	RFP	control	2853600	2164360	2713560	2948080	2508980	2830820	1.12828	2669900	0.207331
	CTR01_1	C	11	TRCN0000072212	rfp_401s1c1	RFP	control	17736040	10053440	14432680	19702280	13894740	17067480	1.22834	15481110	1.20219
	CTR01_1	C	12	TRCN0000072213	rfp_620s1c1	RFP	control	9977480	4588040	8044200	8334000	7282760	8189100	1.12445	7735930	0.600734
	CTR01_1	D	2	TRCN0000072215	rfp_403s1c1	RFP	control	11456640	5226240	8819560	10779600	8341440	9799580	1.17481	9070510	0.70437
	CTR01_1	D	3	TRCN0000072216	rfp_513s1c1	RFP	control	14187280	9558280	14413720	14132880	11872780	14273300	1.20219	13073040	1.01519
	CTR01_1	D	4	TRCN0000072217	rfp_612s1c1	RFP	control	5047600	3534000	1497960	5649840	4290800	3573900	0.832922	3932350	0.305367
	CTR01_1	D	5	TRCN0000072218	rfp_66s1c1	RFP	control	7472080	2950080	5203400	5940960	5211080	5572180	1.06929	5391630	0.418687
	CTR01_1	D	6	TRCN0000072219	rfp_576s1c1	RFP	control	6058440	3400200	6350120	8945680	4729320	7647900	1.61712	6188610	0.480577
	CTR01_1	D	8	TRCN0000072221	rfp_407s1c1	RFP	control	24773120	22506320	25741960	24302800	23639720	25022380	1.05849	24331050	1.88943
	CTR01_2	C	2	TRCN0000072203	rfp_283s1c1	RFP	control	5145440	7286480	3809240	4446000	6215960	4127620	0.664036	5171790	0.401615
	CTR01_2	C	3	TRCN0000072204	rfp_189s1c1	RFP	control	12257920	10312160	13864080	12463840	11285040	13163960	1.1665	12224500	0.949294
	CTR01_2	C	4	TRCN0000072205	rfp_59s1c1	RFP	control	10655000	9444680	10042800	9234240	10049840	9638520	0.959072	9844180	0.76445
	CTR01_2	C	5	TRCN0000072206	rfp_276s1c1	RFP	control	1175480	876600	386560	555640	1026040	471100	0.459144	748570	0.0581302
	CTR01_2	C	7	TRCN0000072208	rfp_269s1c1	RFP	control	5514320	5993920	7054680	4907040	5754120	5980860	1.0394	5867490	0.45564
	CTR01_2	C	8	TRCN0000072209	rfp_188s1c1	RFP	control	16076040	17426680	15688200	13230200	16751360	14459200	0.863166	15605280	1.21183
	CTR01_2	C	9	TRCN0000072210	rfp_402s1c1	RFP	control	10517080	12644000	11975920	10750920	11580540	11363420	0.981251	11471980	0.890857
	CTR01_2	C	10	TRCN0000072211	rfp_621s1c1	RFP	control	3675000	2517840	1726400	1302880	3096420	1514640	0.489158	2305530	0.179036
	CTR01_2	C	11	TRCN0000072212	rfp_401s1c1	RFP	control	10936600	14379000	13011640	7684360	12657800	10348000	0.81752	11502900	0.893258
	CTR01_2	C	12	TRCN0000072213	rfp_620s1c1	RFP	control	5360040	8454920	4262640	4366240	6907480	4314440	0.624604	5610960	0.435719
	CTR01_2	D	2	TRCN0000072215	rfp_403s1c1	RFP	control	16589760	14286880	11538680	7588800	15438320	9563740	0.619481	12501030	0.970768
	CTR01_2	D	3	TRCN0000072216	rfp_513s1c1	RFP	control	11834160	13326520	10961160	11765280	12580340	11363220	0.903252	11971780	0.929669
	CTR01_2	D	4	TRCN0000072217	rfp_612s1c1	RFP	control	4206600	4621920	2564360	1417480	4414260	1990920	0.45102	3202590	0.248697
	CTR01_2	D	5	TRCN0000072218	rfp_66s1c1	RFP	control	5522480	5950520	3855520	3932280	5736500	3893900	0.678794	4815200	0.373924
	CTR01_2	D	6	TRCN0000072219	rfp_576s1c1	RFP	control	3787160	7606880	5916360	3823280	5697020	4869820	0.854801	5283420	0.410284
	CTR01_2	D	8	TRCN0000072221	rfp_407s1c1	RFP	control	20130720	19480000	18597600	17733480	19805360	18165540	0.917203	18985450	1.47432
	CTR01_1	C	6				no virus	24586040	24662280	141000	142120	24624160	141560	0.00574883
	CTR01_1	D	1				no virus	24292560	23745200	2410720	2520640	24018880	2465680	0.102656
	CTR01_1	D	7				no virus	26956640	25551200	170880	217720	26253920	194300	0.0074008
	CTR01_1	D	9				no virus	25252640	23847240	2596640	1131320	24549940	1863980	0.0759261
	CTR01_1	H	7				no virus	23996040	26956120	129560	160520	25476080	145040	0.00569318
	CTR01_1	H	8				no virus	23722680	26411680	24655520	24094480	25067180	24375000	0.972387
	CTR01_1	H	9				no virus	24229280	25111960	23981320	23983360	24670620	23982340	0.972101
	CTR01_1	H	10				no virus	23273760	24994360	189440	138880	24134060	164160	0.00680201
	CTR01_1	H	11				no virus	23878520	24617680	86520	103040	24248100	94780	0.00390876
	CTR01_1	H	12				no virus	22812200	24113880	81800	95760	23463040	88780	0.00378382
	CTR01_2	B	2				no virus	18685000	19910440	575360	518800	19297720	547080	0.0283495
	CTR01_2	C	6				no virus	18940560	18943360	141240	138360	18941960	139800	0.00738044
	CTR01_2	D	1				no virus	19038760	19838960	1941120	1509280	19438860	1725200	0.0887501
	CTR01_2	D	7				no virus	18997360	19611120	127840	115400	19304240	121620	0.00630017
	CTR01_2	D	9				no virus	19000080	20092640	298480	441000	19546360	369740	0.0189161
	CTR01_2	H	7				no virus	19997160	19296480	108680	124000	19646820	116340	0.00592157
	CTR01_2	H	8				no virus	19411400	19161640	18386600	17648880	19286520	18017740	0.934214
	CTR01_2	H	11				no virus	17475000	19312600	61960	63800	18393800	62880	0.00341854
	CTR01_2	H	12				no virus	17272840	18225560	60880	57120	17749200	59000	0.00332409
	CTR01_1	B	2				no virus	21945880	22787280	1704280	1704480	22366580	1704380	0.0762021
	CTR01_2	H	9				no virus	19894600	18722800	20789800	17793680	19308700	19291740	0.999122
	CTR01_2	H	10				no virus	18329960	18316360	159640	88440	18323160	124040	0.00676957
