# Supplementary material for: Functional genomic screening reveals asparagine dependence as a metabolic vulnerability in sarcoma
Source: eLife. 2015 Oct 24;4:e09436. doi: 10.7554/eLife.09436 (PMC4695385; doi:10.7554/eLife.09436)
Supplement: Supplementary file 5. — DOI: http://dx.doi.org/10.7554/eLife.09436.018 [file elife-09436-supp5.xlsx]

## Sheet: Sheet1
	Supplemental file 5: Kras; p16p19null rhabdomyosarcoma cell line T14R: statistical evaluation
	(Significance levels: 1, 5 shRNAs with FDR<30%; 2, 4 shRNAs with FDR<30%; 3, 3 shRNAs with FDR<30%).
	Gene	Average % of control	Level	p-Value	q-value
	Kras	38.0152	na	0.0008	0.00928
	Asns	30.1621	2	<.0001	0.0058
	Creb3l2	62.687	2	0.009	0.032625
	Basp1	45.3731	3	0.0002	0.00386667
	Ube2c	43.5586	3	<.0001	0.0058
	Rbbp8	56.0619	3	0.0022	0.01595
	Lrrfip1	54.8034	3	0.0017	0.0164333
	Rad54l	57.5634	3	0.0031	0.01798
	Lasp1	60.3698	3	0.0056	0.0270667
	Pold3	62.9619	3	0.0095	0.029
	Prim2	65.6129	3	0.0157	0.0395913
	Cdc20	47.0209	-	0.0002	0.00386667
	Baz1a	55.6483	-	0.002	0.0165714
	Cdt1	56.9233	-	0.0027	0.0174
	Efhd2	53.2742	-	0.0034	0.0179273
	Plk4	63.1832	-	0.0099	0.0273429
	Col18a1	63.092	-	0.0097	0.02813
	Rasa2	63.7785	-	0.0111	0.0292636
	Tuba1a	62.8893	-	0.0093	0.0299667
	Prc1	61.9118	-	0.0077	0.0319
	Tgfb1i1	62.6934	-	0.009	0.032625
	Cotl1	62.4894	-	0.0086	0.0332533
	Has2	61.7554	-	0.0075	0.0334615
	Btg1	68.4023	-	0.0259	0.060088
	Mcm6	68.6743	-	0.0272	0.0606769
	Slc2a1	69.1365	-	0.0294	0.0609
	Kdelr2	69.3364	-	0.0305	0.061
	Rdh11	68.3075	-	0.0255	0.061625
	Snai2	69.0432	-	0.029	0.0622963
	Cenpe	72.4868	-	0.0511	0.0689256
	Tnc	69.2009	-	0.0502	0.0693238
	Cdk5r1	72.127	-	0.0482	0.06989
	Adam8	72.7644	-	0.0533	0.0702591
	Capg	72.3241	-	0.0498	0.0704488
	Runx1	64.6418	-	0.0455	0.0713243
	Hmgb2	68.8922	-	0.0481	0.0715333
	Rbp1	72.0605	-	0.0477	0.0728053
	Clcn5	71.7489	-	0.0454	0.0731444
	Slc39a6	129.273	-	0.0568	0.0732089
	Myo9b	67.4119	-	0.0445	0.0737429
	Cenpa	62.6392	-	0.0397	0.0742774
	Gal	70.7823	-	0.0388	0.0750133
	Sh3bgrl3	71.1715	-	0.0414	0.0750375
	Tubb2a	71.1723	-	0.0414	0.0750375
	Pbk	71.5802	-	0.0442	0.0754
	Cklf	73.7331	-	0.062	0.0781739
	Ngfrap1	74.4399	-	0.069	0.083375
	Smc2	74.6528	-	0.0712	0.0842776
	Egr2	74.4388	-	0.0689	0.0850255
	Dok1	75.9004	-	0.0855	0.09918
	Tgif1	76.0672	-	0.0876	0.0996235
	Pdlim4	76.6777	-	0.0955	0.102574
	Cep55	76.5893	-	0.0943	0.103196
	Ccnd1	77.1174	-	0.1016	0.103382
	Skp2	76.9973	-	0.0999	0.103468
	Cdh11	76.4881	-	0.093	0.103731
	Cyba	76.9745	-	0.0996	0.105033
	Tmeff1	74.9358	-	0.1078	0.1078
	Slc5a3	77.8189	-	0.1119	0.10817
	Shcbp1	71.4166	-	0.1118	0.109905
	Unc5b	124.374	-	0.1158	0.110105
	Ptgs1	78.5374	-	0.1233	0.115345
	Sdc1	78.8316	-	0.1282	0.118025
	Tes	79.7195	-	0.1441	0.124743
	Cdk6	77.4888	-	0.1464	0.124871
	Galns	77.8032	-	0.1519	0.12586
	Edem1	79.5752	-	0.1414	0.126172
	Timp1	79.6964	-	0.1436	0.126194
	Prkg2	80.4029	-	0.1572	0.126633
	Ptk2b	79.4943	-	0.1399	0.126784
	Gpr137b	80.0798	-	0.1509	0.126843
	Ezr	80.3885	-	0.1569	0.128172
	Slc20a1	80.8011	-	0.1653	0.131334
	Fn1	79.1288	-	0.1764	0.138259
	Pafah1b3	81.9808	-	0.1911	0.147784
	Ptges	83.079	-	0.2176	0.15776
	Cdca4	82.7538	-	0.2095	0.157805
	Phf16	82.7022	-	0.2082	0.158889
	Hmgcr	82.9448	-	0.2142	0.159277
	Glipr1	83.0734	-	0.2175	0.159684
	Etv1	118.935	-	0.2287	0.16376
	Trip13	83.7341	-	0.2347	0.164007
	Ednra	83.6976	-	0.2337	0.1653
	Cttn	84.1971	-	0.2473	0.170755
	Pdlim5	84.5638	-	0.2576	0.17373
	Sox11	82.6193	-	0.2549	0.173932
	Vcan	84.9386		0.2684	0.178933
	Bcat1	85.3302	-	0.2801	0.184611
	Zwint	85.6528	-	0.29	0.188989
	Tpbg	120.698	-	0.2984	0.192302
	Dbf4	86.1126	-	0.3044	0.194013
	Psat1	84.5904	-	0.3086	0.194552
	Chsy1	84.9257	-	0.3185	0.198634
	Ccdc109b	87.1168	-	0.3377	0.204027
	Sox9	115.337	-	0.3373	0.205931
	Gnb1	87.0767	-	0.3363	0.207504
	Nr2f1	87.3899	-	0.3471	0.207544
	Fkbp11	87.8788	-	0.3644	0.215665
	Ncam1	78.8981	-	0.3734	0.216572
	Sc4mol	86.5876	-	0.3703	0.216943
	Gem	113.596	-	0.4002	0.227565
	Slc25a24	88.8163	-	0.399	0.229129
	Phgdh	89.3875	-	0.4211	0.234844
	Gas2l1	89.3641	-	0.4202	0.236617
	Phlda1	112.425	-	0.4463	0.23968
	Dbn1	112.714	-	0.4346	0.240065
	Frk	89.9778	-	0.4446	0.240998
	Ptprg	89.9385	-	0.443	0.242396
	Dap	89.287	-	0.4649	0.242921
	F2rl1	90.3826	-	0.4612	0.243178
	Cks1b	90.2935	-	0.4575	0.24344
	Cand1	90.9952	-	0.4869	0.252145
	Socs5	91.2912	-	0.4996	0.256432
	Myo1b	91.4356	-	0.5058	0.257337
	Cdh2	110.375	-	0.5337	0.264569
	Top2a	110.557	-	0.5256	0.265085
	Fscn1	92.0022	-	0.5308	0.2654
	Agpat4	110.205	-	0.5414	0.266112
	Sqle	92.8455	-	0.569	0.275017
	Egr3	109.623	-	0.5679	0.276792
	Cks2	93.3161	-	0.5909	0.28092
	Tubb6	93.2971	-	0.59	0.28281
	Arl4c	93.5308	-	0.601	0.283398
	Ccna2	93.6924	-	0.6087	0.284715
	Grem1	93.9907	-	0.623	0.289072
	Armcx2	105.771	-	0.7571	0.340402
	Lbh	96.451	-	0.7456	0.34051
	Marcksl1	96.8113	-	0.7643	0.340995
	Gstcd	96.3871	-	0.7424	0.34174
	Nmt2	105.78	-	0.7566	0.342834
	Adam19	104.359	-	0.8311	0.36518
	Ier3	97.9695	-	0.825	0.365267
	Mpzl1	98.3021	-	0.8581	0.374209
	Hells	103.369	-	0.8839	0.382584
	Rgs19	99.6454	-	0.9146	0.384397
	Sdc2	99.28	-	0.895	0.384519
	Gjc1	102.803	-	0.9144	0.387118
	Rai14	99.6358	-	0.9141	0.389837
	Spc25	102.183	-	0.9479	0.392701
	Alcam	100.17	-	0.943	0.393482
	Sipa1l3	100.853	-	0.98	0.400282
	Csrp2	101.635	-	0.9776	0.402133
