# Supplementary material for: Functional genomic screening reveals asparagine dependence as a metabolic vulnerability in sarcoma
Source: eLife. 2015 Oct 24;4:e09436. doi: 10.7554/eLife.09436 (PMC4695385; doi:10.7554/eLife.09436)
Supplement: Supplementary file 6. — DOI: http://dx.doi.org/10.7554/eLife.09436.019 [file elife-09436-supp6.xlsx]

## Sheet: Sheet1
	Supplemental file 6: Kras; p16p19null non-myogenic sarcoma cell line Sca1-01: statistical evaluation.
	(Significance levels: 1, 5 shRNAs with FDR<30%; 2, 4 shRNAs with FDR<30%; 3, 3 shRNAs with FDR<30%).
	Symbol	Average % of control	Level	p-value	q value
	Kras	23.0876	na	0.0038	0.0390857
	Asns	6.69336	1	<.0001	0.0072
	Efhd2	46.8886	2	0.0007	0.0252
	Rbbp8	30.7323	2	0.0012	0.0288
	Myo9b	33.5929	2	0.0021	0.0252
	Rad54l	40.5093	3	0.0076	0.0420923
	Runx1	30.693	3	0.0012	0.0288
	Shcbp1	37.7316	3	0.0045	0.0405
	Egr2	42.9416	3	0.0048	0.0384
	Cenpe	39.9054	3	0.0067	0.0402
	Has2	41.5132	3	0.0088	0.0452571
	Cenpa	45.7074	2	0.0173	0.06228
	Ncam1	43.578	3	0.0124	0.05952
	Rasa2	44.3658	3	0.014	0.063
	Capg	45.6045	3	0.0171	0.0648
	Tuba1a	41.6563	3	0.0185	0.0634286
	F2rl1	52.9048	3	0.0493	0.114503
	Lasp1	58.6252	3	0.1019	0.170623
	Cotl1	76.5386	-	0.5477	0.358495
	Pold3	31.9654	-	0.0015	0.0216
	Ube2c	38.6873	-	0.0054	0.03888
	Prc1	34.4727	-	0.0064	0.0418909
	Cdc20	46.4489	-	0.0194	0.0634909
	Dok1	46.8886	-	0.0208	0.065113
	Vcan	34.1181	-	0.0166	0.0664
	Cdt1	45.4115	-	0.0165	0.0698824
	Tgfb1i1	47.7096	-	0.0235	0.0705
	Tnc	38.7244	-	0.0287	0.082656
	Marcksl1	6.74212	-	0.0329	0.0911077
	Basp1	50.8361	-	0.0371	0.0989333
	Cdca4	51.3145	-	0.0397	0.102086
	Tmeff1	52.4213	-	0.0462	0.11088
	Rdh11	48.5149	-	0.0456	0.113214
	Agpat4	123.827	-	0.0548	0.1233
	Galns	51.0119	-	0.0615	0.130235
	Lrrfip1	54.4497	-	0.0606	0.132218
	Plk4	55.8401	-	0.0724	0.148937
	Clcn5	56.0598	-	0.0745	0.149
	Gpr137b	59.4063	-	0.1116	0.1674
	Kdelr2	59.6099	-	0.1143	0.167951
	Egr3	114.562	-	0.1103	0.16897
	Cks1b	56.1989	-	0.1095	0.171391
	Fn1	57.0009	-	0.1191	0.171504
	Creb3l2	60.2497	-	0.123	0.173647
	Psat1	57.539	-	0.1258	0.174185
	Tes	56.1434	-	0.1089	0.17424
	Baz1a	58.6238	-	0.1018	0.174514
	Hmgb2	58.5533	-	0.101	0.177366
	Sdc1	59.1742	-	0.1087	0.177873
	Chsy1	57.9771	-	0.1316	0.178777
	Rai14	58.2531	-	0.1353	0.1804
	Adam8	58.3433	-	0.0985	0.181846
	Ptges	64.4882	-	0.0985	0.181846
	Alcam	115.658	-	0.0969	0.1836
	Socs5	58.1026	-	0.0957	0.186227
	Timp1	49.6425	-	0.1633	0.206274
	Ier3	62.7806	-	0.1627	0.209186
	Gem	111.246	-	0.1599	0.209324
	Gas2l1	64.1098	-	0.187	0.210375
	Skp2	63.1846	-	0.1698	0.210786
	Gal	63.8544	-	0.1821	0.211471
	Prim2	61.5611	-	0.1863	0.212914
	Edem1	63.6304	-	0.1779	0.21348
	Cdh11	63.7875	-	0.1809	0.213521
	Slc2a1	63.5535	-	0.1765	0.21539
	Snai2	64.6502	-	0.1977	0.218991
	Cand1	59.1653	-	0.207	0.222448
	Fkbp11	65.6549	-	0.2186	0.224846
	Sox11	65.0874	-	0.2066	0.225382
	Ptk2b	73.1316	-	0.2164	0.225809
	Ptprg	55.9259	-	0.2148	0.227435
	Slc20a1	66.0097	-	0.2264	0.229589
	Glipr1	66.4002	-	0.2351	0.231879
	Rgs19	118.711	-	0.2348	0.2348
	Armcx2	107.066	-	0.2444	0.237795
	Smc2	67.3146	-	0.2566	0.246336
	Cdk5r1	67.6535	-	0.2649	0.247699
	Dbn1	105.97	-	0.271	0.250154
	Pbk	67.6341	-	0.2645	0.250579
	Ccna2	107.111	-	0.2931	0.267129
	Etv1	104.972	-	0.2969	0.26721
	Cdk6	69.1385	-	0.3035	0.269778
	Btg1	69.6254	-	0.3169	0.274901
	Nr2f1	69.5847	-	0.3157	0.2772
	Ccnd1	70.2051	-	0.3334	0.285771
	Sc4mol	70.3838	-	0.3385	0.286729
	Tgif1	70.9111	-	0.3541	0.296456
	Dap	63.1548	-	0.3739	0.305918
	Rbp1	71.4474	-	0.3705	0.306621
	Ccdc109b	72.7807	-	0.4131	0.326848
	Tpbg	105.047	-	0.4102	0.32816
	Sh3bgrl3	72.6455	-	0.4086	0.330553
	Unc5b	100.588	-	0.4297	0.332671
	Hells	73.2329	-	0.4281	0.335035
	Slc39a6	100.355	-	0.4376	0.335183
	Ednra	73.7588	-	0.4924	0.337646
	Tubb2a	75.0653	-	0.4924	0.337646
	Cttn	72.3675	-	0.4478	0.339385
	Gnb1	75.4034	-	0.5048	0.339679
	Myo1b	75.0323	-	0.4912	0.340062
	Frk	102.869	-	0.4688	0.340945
	Cep55	74.0055	-	0.4546	0.34095
	Pafah1b3	74.6753	-	0.4783	0.340966
	Ngfrap1	74.303	-	0.4651	0.341706
	Bcat1	73.2129	-	0.4746	0.341712
	Gjc1	68.4951	-	0.4904	0.342804
	Sdc2	74.9312	-	0.4876	0.344188
	Arl4c	99.5819	-	0.4644	0.344709
	Cklf	72.7178	-	0.5181	0.3454
	Gstcd	100.195	-	0.5465	0.360991
	Phlda1	96.8967	-	0.5644	0.366097
	Slc5a3	77.2012	-	0.5735	0.368679
	Mpzl1	97.261	-	0.5904	0.376184
	Ezr	77.9418	-	0.603	0.380842
	Sipa1l3	95.5833	-	0.6168	0.38617
	Phgdh	95.3521	-	0.6263	0.388738
	Trip13	78.9164	-	0.6428	0.388921
	Csrp2	71.9004	-	0.6374	0.388922
	Nmt2	95.1179	-	0.6359	0.391323
	Dbf4	79.3964	-	0.6628	0.394393
	Adam19	79.2668	-	0.6574	0.39444
	Mcm6	78.1918	-	0.691	0.404488
	Slc25a24	80.0146	-	0.689	0.406623
	Pdlim4	82.0427	-	0.7772	0.444114
	Sox9	91.9206	-	0.773	0.445248
	Hmgcr	81.9196	-	0.7718	0.448142
	Grem1	82.0034	-	0.7972	0.451956
	Ptgs1	76.0252	-	0.8061	0.453431
	Col18a1	90.909	-	0.8181	0.456614
	Cdh2	90.2458	-	0.848	0.466076
	Zwint	90.3405	-	0.8438	0.467335
	Tubb6	90.7662	-	0.8616	0.469964
	Cks2	84.0776	-	0.8688	0.470328
	Spc25	89.5479	-	0.8798	0.472728
	Top2a	89.1295	-	0.8989	0.475888
	Fscn1	84.6835	-	0.8964	0.47808
	Prkg2	85.3364	-	0.9264	0.483339
	Lbh	85.3125	-	0.9253	0.486289
	Pdlim5	88.0026	-	0.9507	0.492449
	Cyba	87.1827	-	0.9885	0.501211
	Sqle	86.4909	-	0.9839	0.502417
	Phf16	86.4879	-	0.9815	0.504771
