# Supplementary material for: Functional genomic screening reveals asparagine dependence as a metabolic vulnerability in sarcoma
Source: eLife. 2015 Oct 24;4:e09436. doi: 10.7554/eLife.09436 (PMC4695385; doi:10.7554/eLife.09436)
Supplement: Supplementary file 7. — DOI: http://dx.doi.org/10.7554/eLife.09436.020 [file elife-09436-supp7.xlsx]

## Sheet: Sheet1
	Supplemental file 7: Amino acid levels (mM) in Asparaginase-treated and untreated mice.
		Untreated (mean)	Asparaginase treated (mean)	Ratio (treated/untreated)	p
	Asparagine	51.5333	4.425	0.0858668	<0.0001
	Aspartate	11.0667	48.05	4.34187	0.008
	Methionine	44.1333	133.725	3.03002	0.03
	Proline	95.6333	273.8	2.86302	0.02
	Lysine	200.967	548.65	2.73005	0.001
	Alanine	352.033	903.325	2.56602	0.01
	Serine	100.4	248.15	2.47161	0.002
	Glycine	283.9	679.5	2.39345	0.03
	Threonine	149.867	344.4	2.29804	0.009
	Arginine	75.0333	144.55	1.92648	0.001
	Citrulline	70.6667	129.35	1.83042	0.009
	Ornithine	111.1	200.275	1.80266	0.02
	Histidine	65.8667	116.775	1.7729	0.0005
	Phenylalanine	63.6667	98.35	1.54476	0.02
	Glutamine	554.267	732	1.32066	0.004
	Valine	246.9	366.125	1.48289	0.05
	Hydroxyproline	21.4667	59.475	2.77057	0.07
	Leucine	178.267	258	1.44727	0.1
	Tyrosine	76.2333	95.85	1.25732	0.1
	Isoleucine	107.033	145.525	1.35962	0.2
	Tryptophan	39.4333	49.625	1.25845	0.2
	Glutamate	88.4667	134.95	1.52543	0.3
	Taurine	955.867	1063.22	1.11232	0.4
	Cysteine	36.3	33.85	0.932507	0.7
