# Supplementary figures and images for: Functional genomic screening reveals asparagine dependence as a metabolic vulnerability in sarcoma
Source: eLife journal article supplement (doi:10.7554/elife.09436), 2015-10-24

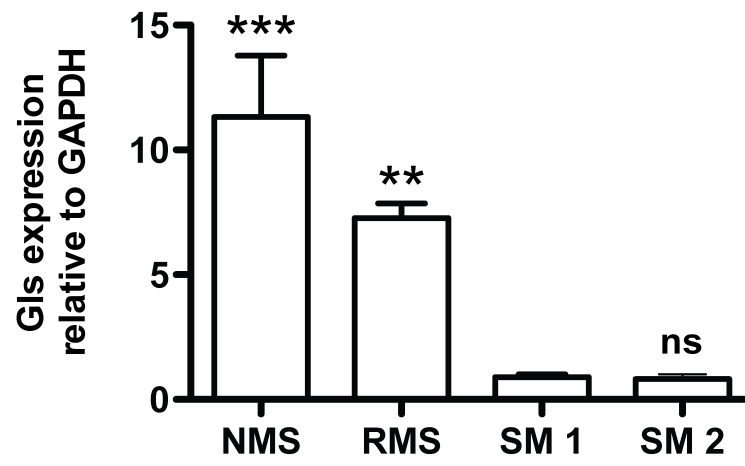

Figure 2 - Figure Supplement 3. Glutaminase expression in mouse *Kras;p16p19<sup>null</sup>* sarcoma cells.

Supplement: supp [file elife-09436-supp-v1.zip]

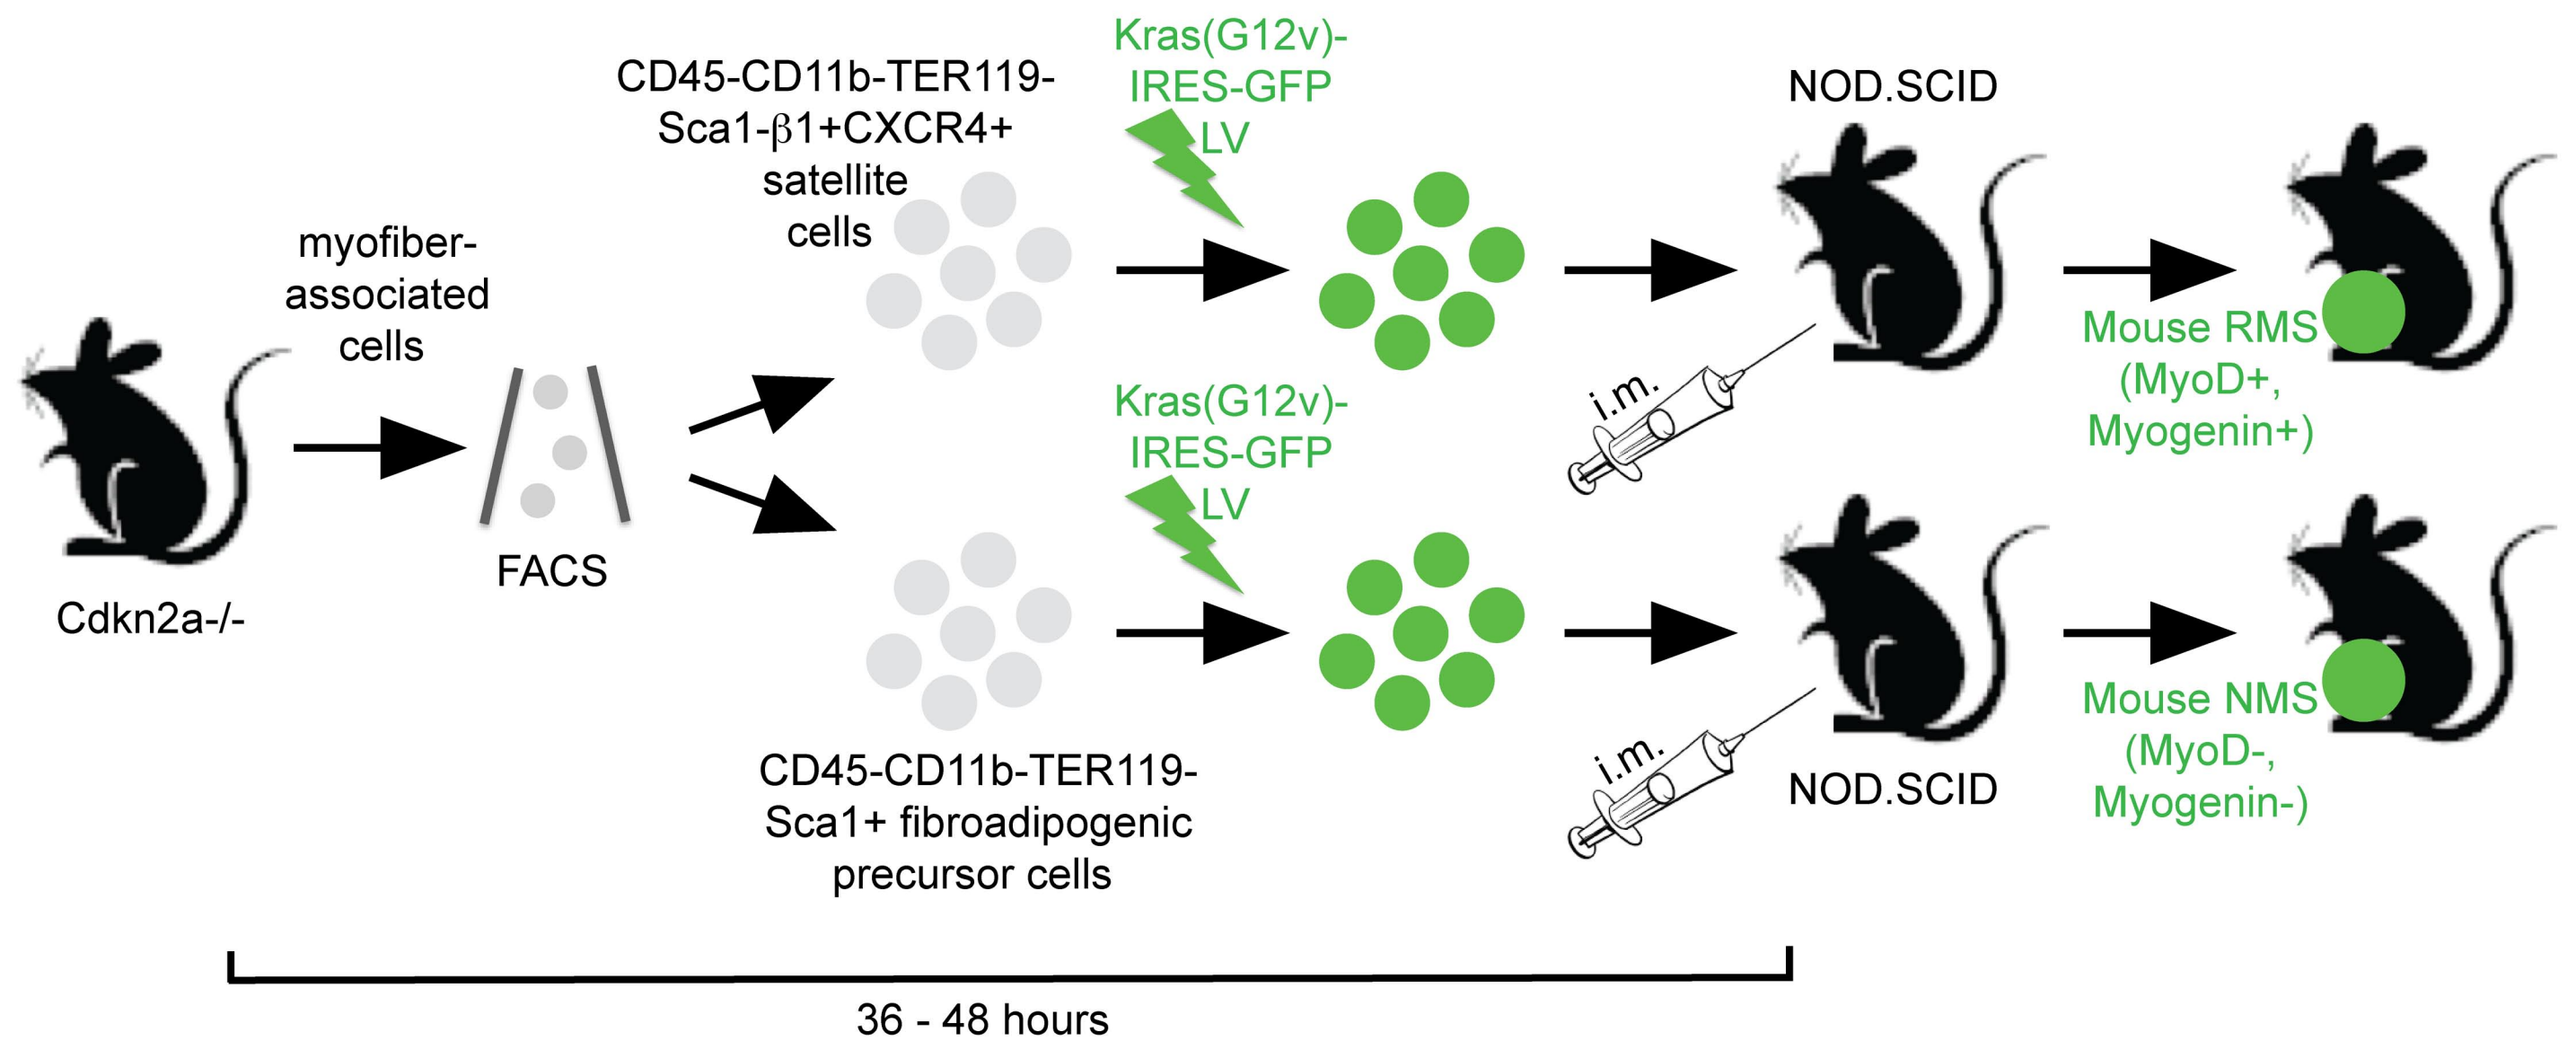

Supplement: supp [file elife-09436-supp-v1.zip]

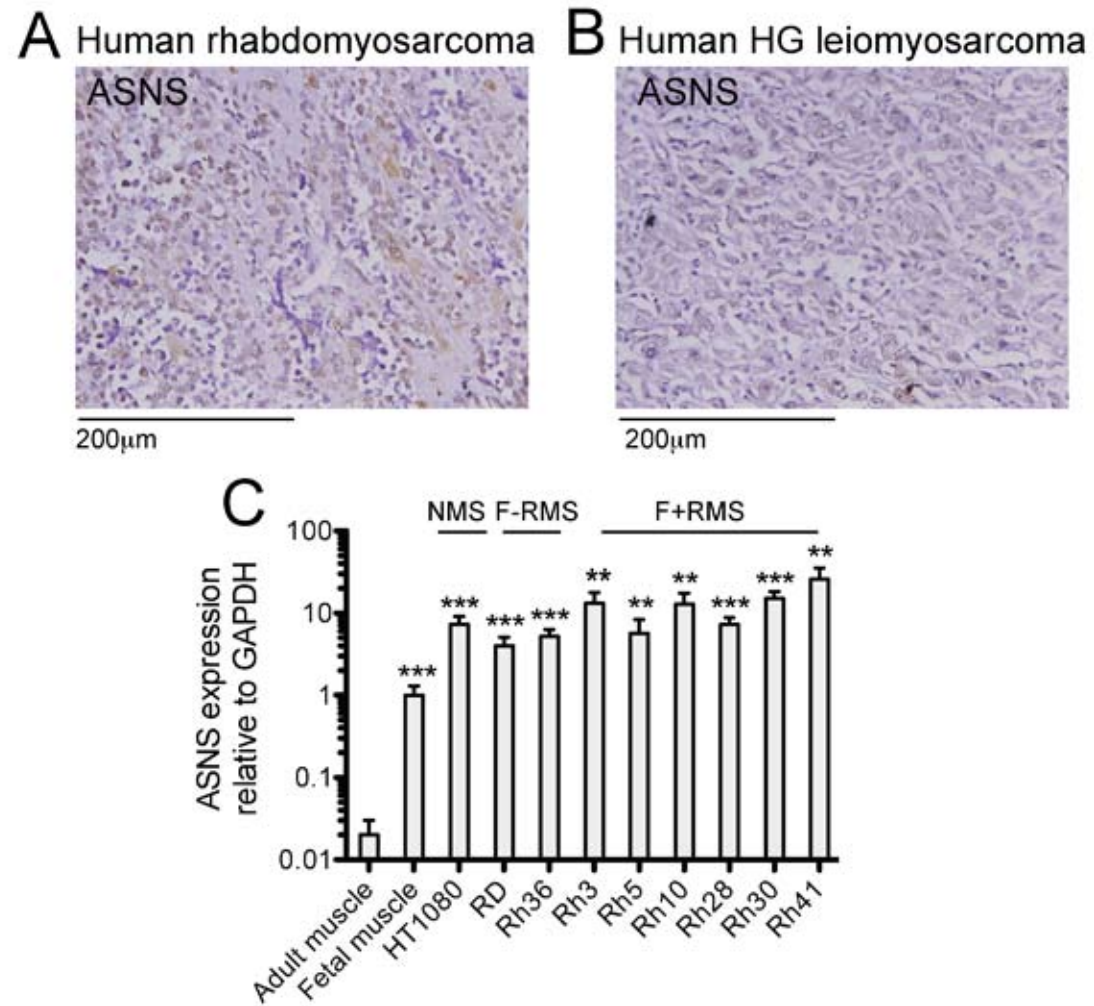

Figure 4 – Figure supplement 1. Expression of candidate sarcoma targets in human sarcoma tissue.

Supplement: supp [file elife-09436-supp-v1.zip]
